# Supplementary material for: Naming the Unnamed: Over 45,000 Candidatus Names for Unnamed Archaea and Bacteria in the Genome Taxonomy Database
Source: Preprints.org preprint supplement (doi:10.20944/preprints202111.0557.v1), 2021-11-30
Supplement: Supplementary file 1 [file supplementary]

## Sheet: 1,474 name_openings.txt
ceruc
lorip
petul
tamet
hegum
daduc
merid
denun
malig
recor
malif
dilud
depoc
perid
lanif
velif
reful
murel
defun
munim
haric
pinac
cisor
fiden
lucel
figil
saxop
manub
gemeb
nubif
vocam
monim
negot
muril
bical
pomif
vigen
divor
rudic
bacif
megal
venab
desac
cacal
vicat
fetul
sarab
nucif
cinef
dicim
casab
dehis
cibar
soliv
cenac
vecor
ruric
xenod
nocen
bucol
perex
dilec
genoc
revul
levid
solif
debuc
teleg
nutab
teneb
habac
mirac
laxit
nubec
resul
monop
tegum
perib
cenod
dilib
dehon
cunab
mahem
cosid
rorul
recoc
tabit
dedig
negid
fecun
resur
taxil
decup
manup
colut
dimid
deten
catag
culul
lamet
decit
dibuc
colip
fiduc
virip
demig
benif
semun
lanug
renav
lacin
fefel
detor
salub
munif
teten
peric
deful
canac
bonit
codif
camil
caruc
monod
cufer
lavab
bicip
lupan
menap
subin
rinoc
perip
docum
defes
morig
totid
defac
sanab
tibic
simin
dinup
telef
cosig
desom
bulap
maliv
denec
cibic
rumif
delap
saxif
locel
cohur
fecul
denup
vitig
culig
holov
venuc
perac
hirud
demog
sugil
dirit
casel
conop
turif
decec
forin
depic
vanid
divol
visib
depac
cicil
buxan
defar
nicot
monac
colim
tomac
soniv
beniv
lutic
refac
detot
cepur
pudib
vorag
doxol
silig
dimac
hexag
divul
lanig
vitif
lenoc
colub
cerif
pacif
semib
recum
dicib
virec
vavas
pedif
visif
lucer
nehal
panif
recog
vilit
conif
cerar
virag
mirif
lavac
bicor
bonif
demul
decat
labec
conig
homol
derun
fatil
necub
cepul
nosoc
vinol
denic
deleb
ludib
hexam
casig
paral
cetar
maxil
homun
gabin
pedep
mimog
nocum
fatic
facun
verec
conin
fetut
defet
rorif
depop
catob
manom
subod
bucel
hecat
conam
volun
vitab
tolut
domig
visoc
gigan
carec
dapif
benev
citoc
penic
vicec
timef
nidif
cerac
furib
defos
cimit
serot
panop
bipin
famel
bisul
resac
nicom
cinip
nefar
denom
gasom
cacom
turic
vitup
fumif
semip
relec
dupun
semap
barop
resal
lorar
mavor
tarax
vatil
cimin
horom
letif
dipon
denix
navic
milip
sitic
nugac
favil
semid
desur
dimad
depup
luxur
detun
bipen
sicar
cerof
nitel
semig
cucur
vehic
minur
cilot
rubic
dimin
semod
cobal
haluc
nugig
celum
dilic
docib
carun
cenot
cocol
curac
vinac
decuc
funeb
lacul
cadav
coten
delub
vivif
direc
benep
melop
lapic
detos
genuf
solip
capuc
demad
dicab
decin
lucul
deluc
manib
sitel
biver
homog
vilip
tumef
cotic
macil
relap
citiv
xeram
subad
mahel
fumac
foric
malag
supel
navif
melil
palif
ridib
lugub
desuc
conip
hibis
nubig
cataf
subof
medim
sicun
semiv
capud
colop
cocod
galac
socag
locup
cotur
depub
vibur
relen
reduv
funam
videl
xenop
homag
susic
voluc
fatif
penec
molec
detes
semim
tenil
demag
cerom
tiroc
ficul
nugiv
desor
hirun
desep
subuc
venun
detep
paroc
milif
fetif
depel
maled
xerop
purul
conub
luben
herin
monog
masoc
bipat
notac
musul
redun
catec
domab
cituv
homul
fedit
tereb
monum
repur
repep
cacop
semil
dupon
pinig
pecun
valef
refor
dilog
pepen
depec
bicub
calip
direp
remed
bicap
bugil
nonin
ducil
lenun
papav
nutam
telev
legif
vepal
benem
vagab
malog
vocif
hexap
senac
bicod
duric
sicin
verid
cicat
coroc
revec
cohor
tomog
linig
futat
sotul
tabif
dican
binoc
fusif
hemid
buxif
regig
capab
filif
deson
sacom
bimet
selib
nimir
vacil
denig
rutab
cimel
dilac
podag
rudec
dilem
disid
humec
novil
denav
cemen
devec
retun
cilib
rubec
venef
bigar
tegim
bigem
cadur
detec
lapil
rorar
raref
bifar
fefic
refoc
desup
femel
metap
verif
tigur
sonab
remul
parop
detum
cocib
ludim
curot
culib
patib
necop
lucub
veliv
celam
tirun
perop
decen
decap
metuc
lutul
bovic
repud
cisal
dibap
risib
conib
ficed
dehin
badit
culil
depet
bicin
butub
tenem
momor
delec
pimen
refin
forab
bisac
homic
metab
decul
cicar
resup
redac
homil
conab
subab
latib
minag
vehem
cutic
mirab
decac
recuc
semif
capil
selec
lenim
papil
ranun
derel
sifun
domic
sacop
satac
modif
catal
rubig
pavim
democ
depar
decun
ratif
conar
maxum
nivom
fulig
bifis
pabil
ludif
rosar
turil
parac
decam
decom
secun
perad
lucif
puleg
citip
retec
delac
funiv
rubef
hemit
categ
licen
carav
depas
colap
mutab
levif
denor
cenob
cilic
robig
favon
sepos
cereb
didac
vigin
tubic
colep
repag
derec
holis
domip
pocil
sabur
catil
defan
betac
gerun
manuf
turib
defas
bipal
bimot
perab
notab
rurig
regif
pavic
repec
sonip
defen
catab
defal
recom
nefan
pinif
cerev
catoc
vanit
penur
cohon
vinul
desul
diluv
rosac
refun
catap
cerim
senip
gasif
sicub
defor
curab
subac
volub
bipar
fibic
solac
monoc
assud
obluc
adbel
artil
attel
exurr
oblan
excet
trisc
sterc
cnest
antef
appug
exsat
arusp
aphor
apseg
adfam
argit
inlac
obtem
irrot
enunt
frigd
inarg
algif
expur
anamn
acrat
armif
crast
ascel
abnep
crusm
assib
obmur
eclec
inoff
alcal
agrap
adsud
advin
exorc
octip
adcul
effin
estov
ambif
arcub
odont
obsig
inasp
uberr
ecnep
imbel
irref
endiv
adrot
abrel
adgub
ossif
alcib
excer
abmat
arcit
abant
illap
innum
adluv
eclip
intam
impol
incoc
inmit
aples
aspil
excam
idips
obten
adtes
indiv
inlib
excan
artuf
enhar
astap
apsoc
operc
epicl
immus
adpug
acric
aterr
inord
obrig
agrav
agrim
immed
obsat
innul
inves
inpen
inobl
adhin
grall
exagg
adfir
obfir
acrif
inlap
adlen
annuc
adhor
excor
myalg
illun
scamm
acont
incul
exsol
echid
adpen
intec
plasc
immad
ornit
assic
exsuf
abver
excom
illep
tribr
chalb
accen
obnup
utill
adpic
excal
ammur
andab
alism
indid
insuf
obtun
admig
octod
accuc
adses
infis
inres
encol
utrin
alced
anagn
ingur
arcip
extun
ignom
exind
anxif
arund
ammat
oratr
immem
inhum
artop
irrev
arcat
ablep
ammod
abasc
allub
agnom
agric
indup
exhed
oppor
ascen
inrep
adful
adess
onocr
adpin
insic
albog
exhon
aggub
indot
propr
adgen
allib
inhos
occuc
inmor
oblon
istin
absoc
adnar
fragl
invic
acrol
admul
effos
tranv
inabs
embam
spast
apsen
adnil
inrem
irred
indir
egrit
aggen
ampen
insem
ecast
occal
irrec
invec
illib
attub
progr
inadf
obtes
addiv
ecfac
effig
inpel
ambad
prodr
adsec
infac
agrat
ulcis
oscil
anecl
infes
smegm
acrop
inerg
ossic
obmut
adpor
inabr
atlan
egreg
invet
indep
adrec
adcog
appag
adinv
enimv
atric
admod
adcom
inlep
absur
echog
infen
ininn
optab
impil
urbic
chanc
expen
clanc
tresv
alemb
scomb
affun
agnic
inlus
acisc
aperc
artoc
procl
inmen
aspor
adces
insor
altiv
adtac
scorb
undev
ignob
enigm
allac
inurb
incun
adnic
advig
inciv
absor
amerc
armip
acert
alsid
affir
avonc
abrep
accul
anast
alsis
progn
abinv
expal
excul
armig
adfan
inpud
apper
adlub
ensig
infun
eccis
indom
armic
excog
innox
adpel
appos
adges
ignip
obtor
offir
octac
argum
adosc
intem
adfab
ambac
apsol
invin
appic
ardif
advor
occen
abnoc
arill
adsen
omnif
expug
ociss
expis
adalg
innab
adsus
ambus
acroc
adnun
exfor
inmob
intol
irrem
adsif
obsor
apopl
omnip
ossar
induv
obfen
antir
abamb
adren
abnor
impig
inret
inbec
crupp
emanc
idcir
obliv
energ
accom
inmem
inmac
escul
immig
trocl
immat
odoll
apruc
prosl
accog
inard
expec
tricl
anarr
impav
adlac
obloc
exsan
ignos
oppug
ephip
adver
eccil
abpat
adsoc
immac
innup
artif
enucl
inacc
illuv
ammix
annif
omnim
inreg
ignic
abrum
altic
inred
inher
abluv
anact
optum
inhor
adord
afful
anacl
acruf
procr
insin
arnac
altip
irrel
adcuc
scint
omniv
exhil
exher
almuc
impac
adcub
immob
arcel
atrop
octin
expop
unetv
adsic
ascis
inmod
insen
excuc
omnin
inobs
ignif
probl
adpec
ellip
insom
inorn
aminn
agges
aglas
acrim
incon
orget
ecfun
asbes
infan
inces
fragm
astip
evisc
ensif
aranc
adtum
exsur
insop
admor
epigr
aprug
esson
exsom
attol
crabr
ermel
efful
eclig
exsus
ingig
adten
arrec
everb
admut
epogd
adsul
adtem
imbec
abseg
ediss
edulc
inhab
avunc
scacc
protr
anapl
obsur
epist
adamb
ontol
armid
affan
attor
intac
ineff
prosc
inexp
adlap
intor
asept
insur
arceb
chern
incor
apsur
inmol
adtil
antep
obvol
accap
infir
antac
utrol
inbel
atteg
appac
obtec
epitr
adnep
assef
indev
obnun
invig
alsul
adnul
adlic
ephem
obsol
oppan
ambec
incom
immod
exsor
extor
entom
utrar
incen
isosc
aclas
encep
anteg
obnox
apogr
ecten
opusc
emort
immur
acrot
brasm
exosc
infor
accum
adsuc
adpos
adper
indec
inocc
adsig
ascal
intur
antip
arbav
ammul
admur
innas
ossuc
inobr
advec
uxorc
advic
insal
ananc
scell
affam
acust
innec
insib
blact
arvec
adpac
accor
insep
exhor
amatr
utpot
inlec
allob
brabr
obsec
exsup
alluv
adtub
annic
octup
arcif
adnum
abhin
elast
occum
effar
arrem
adfun
adobr
adrem
octus
exorb
evang
prosp
thess
annec
adcum
encom
adpag
attes
aprar
ablig
inexs
effac
inhon
insub
infel
errab
altif
afran
adnub
ensic
incuc
antim
affab
invor
adhos
excar
exadv
obamb
infuc
artol
inper
offul
obver
infin
abind
encen
antom
addub
adrum
octob
utral
antev
exsis
inloc
adlec
amnig
effun
omnig
actut
obfus
impud
annub
almit
alect
indip
attem
impin
impir
arrab
inpas
ignig
adsel
epicr
ablac
antec
umbil
effem
actar
assif
acist
accer
algeb
abagm
amnen
utput
pragm
acrob
inrel
adtor
inpin
extip
infab
inten
excin
inexc
agrip
expan
utric
allap
inamb
inmut
inref
plusc
ammig
ancep
anatr
expas
intab
exent
assub
indil
exasp
apsor
excoc
adloc
intes
arrug
octop
offun
ancip
inrec
extur
inpur
ambid
adpan
atrus
irreg
indub
obval
adcel
appec
irrad
appor
adsib
extin
arnog
angip
scept
adagg
adtag
infat
impug
adnec
apsim
pract
plost
adtol
elleb
insus
aphar
thaps
inlum
amfit
indif
episc
argim
assuc
inrev

## Sheet: 1,473 archaeal genus names
Biverarcha
Halucarcha
Robigarcha
Gasomarcha
Hexaparcha
Cacalarcha
Depelarcha
Fuligarcha
Momorarcha
Solacarcha
Vehemarcha
Tirunarcha
Culularcha
Catalarcha
Pimenarcha
Sarabarcha
Rosararcha
Gemebarcha
Dececarcha
Domigarcha
Xeramarcha
Bifararcha
Caliparcha
Remedarcha
Linigarcha
Coniparcha
Coliparcha
Murilarcha
Resalarcha
Buxifarcha
Cuferarcha
Desonarcha
Rorularcha
Dilemarcha
Catilarcha
Camilarcha
Cerucarcha
Colutarcha
Renavarcha
Depetarcha
Subinarcha
Holovarcha
Direparcha
Cemenarcha
Conifarcha
Pinifarcha
Denecarcha
Cunabarcha
Capabarcha
Subucarcha
Casabarcha
Dehinarcha
Depecarcha
Desucarcha
Delaparcha
Rubefarcha
Benevarcha
Denavarcha
Lanigarcha
Nefanarcha
Minagarcha
Vitabarcha
Licenarcha
Refularcha
Patibarcha
Manufarcha
Decinarcha
Rutabarcha
Petularcha
Secunarcha
Regifarcha
Depicarcha
Monacarcha
Pulegarcha
Tegumarcha
Monocarcha
Malagarcha
Manomarcha
Fiducarcha
Timefarcha
Recocarcha
Decomarcha
Viragarcha
Dicibarcha
Rarefarcha
Dilecarcha
Vinacarcha
Recomarcha
Cisorarcha
Vicatarcha
Milifarcha
Feficarcha
Cenobarcha
Depuparcha
Cobalarcha
Podagarcha
Carunarcha
Miliparcha
Rubicarcha
Voragarcha
Melilarcha
Retecarcha
Ducilarcha
Cadurarcha
Culilarcha
Capucarcha
Bisularcha
Paracarcha
Tabifarcha
Vanitarcha
Menaparcha
Conamarcha
Lavacarcha
Telefarcha
Morigarcha
Metucarcha
Dimidarcha
Bulaparcha
Cenotarcha
Redunarcha
Medimarcha
Pacifarcha
Buxanarcha
Detorarcha
Curacarcha
Dapifarcha
Nugacarcha
Faticarcha
Siticarcha
Domiparcha
Catecarcha
Dilacarcha
Reforarcha
Levifarcha
Semodarcha
Videlarcha
Semilarcha
Visibarcha
Lenocarcha
Selecarcha
Siligarcha
Siminarcha
Cicararcha
Citiparcha
Bipalarcha
Celamarcha
Perexarcha
Cohonarcha
Citocarcha
Sotularcha
Solifarcha
Salubarcha
Sifunarcha
Cilicarcha
Detosarcha
Velifarcha
Hemitarcha
Lutularcha
Pedeparcha
Desomarcha
Coticarcha
Mimogarcha
Nocumarcha
Monumarcha
Refocarcha
Hibisarcha
Lapicarcha
Resacarcha
Lucifarcha
Soniparcha
Cimelarcha
Nubifarcha
Divorarcha
Mavorarcha
Luxurarcha
Bipatarcha
Homolarcha
Derecarcha
Nicomarcha
Ciminarcha
Defesarcha
Miracarcha
Lubenarcha
Legifarcha
Depasarcha
Dimadarcha
Visifarcha
Solivarcha
Vitifarcha
Sugilarcha
Cerevarcha
Tenilarcha
Fetutarcha
Sicinarcha
Semivarcha
Monimarcha
Conibarcha
Nehalarcha
Bicaparcha
Purularcha
Terebarcha
Forinarcha
Hegumarcha
Ficularcha
Defanarcha
Necubarcha
Filifarcha
Verifarcha
Decacarcha
Vituparcha
Xenoparcha
Nicotarcha
Peroparcha
Mahemarcha
Figilarcha
Cicatarcha
Latibarcha
Laxitarcha
Peradarcha
Bimetarcha
Ranunarcha
Vinolarcha
Ruricarcha
Notabarcha
Luticarcha
Depararcha
Viriparcha
Revecarcha
Sonivarcha
Decucarcha
Resularcha
Horomarcha
Dehisarcha
Vicecarcha
Loriparcha
Furibarcha
Macilarcha
Habacarcha
Codifarcha
Baroparcha
Retunarcha
Cisalarcha
Demigarcha
Tomacarcha
Domabarcha
Lacularcha
Nocenarcha
Valefarcha
Vinularcha
Repudarcha
Desuparcha
Culigarcha
Ludibarcha
Holisarcha
Cicilarcha
Virecarcha
Conabarcha
Peracarcha
Delacarcha
Papavarcha
Nitelarcha
Celumarcha
Meloparcha
Decuparcha
Bigemarcha
Repurarcha
Funamarcha
Tegimarcha
Seniparcha
Fetularcha
Devecarcha
Denicarcha
Cimitarcha
Delecarcha
Bicalarcha
Decaparcha
Navicarcha
Feditarcha
Redacarcha
Subodarcha
Recorarcha
Fumifarcha
Molecarcha
Demadarcha
Homicarcha
Cibicarcha
Munimarcha
Nucifarcha
Dicanarcha
Cacomarcha
Paralarcha
Letifarcha
Televarcha
Turicarcha
Bicorarcha
Dibucarcha
Genufarcha
Pavicarcha
Vivifarcha
Fefelarcha
Resurarcha
Verecarcha
Vavasarcha
Pericarcha
Turifarcha
Penurarcha
Diponarcha
Peridarcha
Monoparcha
Fusifarcha
Cerofarcha
Vagabarcha
Foricarcha
Metaparcha
Herinarcha
Visocarcha
Rinocarcha
Benifarcha
Cenacarcha
Paroparcha
Vacilarcha
Decamarcha
Divolarcha
Documarcha
Pavimarcha
Viburarcha
Decitarcha
Subadarcha
Parocarcha
Bifisarcha
Sanabarcha
Nubigarcha
Taxilarcha
Metabarcha
Cerifarcha
Venunarcha
Sitelarcha
Defularcha
Decatarcha
Diluvarcha
Serotarcha
Vanidarcha
Locuparcha
Musularcha
Vepalarcha
Nosocarcha
Volubarcha
Subabarcha
Venucarcha
Monodarcha
Negidarcha
Maxumarcha
Famelarcha
Fumacarcha
Bigararcha
Bucelarcha
Caravarcha
Recogarcha
Detesarcha
Vilitarcha
Curotarcha
Semiparcha
Mirifarcha
Gabinarcha
Femelarcha
Vocamarcha
Dedigarcha
Dimacarcha
Volunarcha
Cocolarcha
Ridibarcha
Homunarcha
Defunarcha
Nidifarcha
Denomarcha
Vatilarcha
Pocilarcha
Homagarcha
Denorarcha
Giganarcha
Homilarcha
Tigurarcha
Dilogarcha
Diminarcha
Decunarcha
Manuparcha
Vocifarcha
Nubecarcha
Pudibarcha
Malivarcha
Butubarcha
Corocarcha
Sicubarcha
Soliparcha
Socagarcha
Nugivarcha
Depacarcha
Repecarcha
Catobarcha
Semidarcha
Nimirarcha
Conigarcha
Doxolarcha
Dehonarcha
Desurarcha
Depubarcha
Bacifarcha
Cepurarcha
Perabarcha
Beneparcha
Hirudarcha
Defararcha
Dicabarcha
Regigarcha
Futatarcha
Seposarcha
Bovicarcha
Xenodarcha
Nugigarcha
Refinarcha
Turilarcha
Taraxarcha
Delebarcha
Totidarcha
Cerebarcha
Colaparcha
Telegarcha
Facunarcha
Dilibarcha
Lametarcha
Favonarcha
Tubicarcha
Penecarcha
Vigenarcha
Ratifarcha
Delucarcha
Locelarcha
Mutabarcha
Risibarcha
Coturarcha
Defetarcha
Ludimarcha
Relenarcha
Navifarcha
Mirabarcha
Cotenarcha
Recumarcha
Delubarcha
Desacarcha
Lucularcha
Cadavarcha
Tenemarcha
Disidarcha
Carecarcha
Tenebarcha
Periparcha
Depoparcha
Ceracarcha
Deforarcha
Lucubarcha
Conubarcha
Ceromarcha
Demagarcha
Conoparcha
Cacoparcha
Fibicarcha
Saburarcha
Tomogarcha
Maligarcha
Derunarcha
Desularcha
Catocarcha
Remularcha
Velivarcha
Favilarcha
Haricarcha
Tirocarcha
Benivarcha
Diritarcha
Palifarcha
Masocarcha
Cepularcha
Sacomarcha
Rubigarcha
Nutabarcha
Lorararcha
Pepenarcha
Ciniparcha
Venabarcha
Demogarcha
Malifarcha
Homularcha
Detenarcha
Pinacarcha
Rorararcha
Papilarcha
Hexamarcha
Demularcha
Nutamarcha
Vehicarcha
Rudecarcha
Denuparcha
Negotarcha
Galacarcha
Cibararcha
Mahelarcha
Lucerarcha
Levidarcha
Denixarcha
Rurigarcha
Vecorarcha
Repagarcha
Lucelarcha
Relaparcha
Detumarcha
Lanifarcha
Recucarcha
Diludarcha
Bimotarcha
Rudicarcha
Cocodarcha
Defasarcha
Nefararcha
Refacarcha
Subacarcha
Lanugarcha
Casigarcha
Catagarcha
Fatifarcha
Maxilarcha
Defalarcha
Necoparcha
Decenarcha
Bipinarcha
Sonabarcha
Benemarcha
Notacarcha
Coloparcha
Gerunarcha
Panoparcha
Defacarcha
Saxifarcha
Cosigarcha
Lupanarcha
Hirunarcha
Culibarcha
Fidenarcha
Coleparcha
Coninarcha
Bonitarcha
Peribarcha
Derelarcha
Xeroparcha
Cohurarcha
Duponarcha
Pedifarcha
Debucarcha
Funivarcha
Nivomarcha
Cucurarcha
Murelarcha
Dinuparcha
Fecularcha
Domicarcha
Catabarcha
Subofarcha
Deteparcha
Lenunarcha
Novilarcha
Semimarcha
Deseparcha
Binocarcha
Lenimarcha
Cilibarcha
Gasifarcha
Bipararcha
Depocarcha
Pinigarcha
Desorarcha
Betacarcha
Bonifarcha
Catafarcha
Manibarcha
Biciparcha
Munifarcha
Cerararcha
Detotarcha
Pabilarcha
Colubarcha
Didacarcha
Cuticarcha
Lapilarcha
Detecarcha
Viginarcha
Categarcha
Bicubarcha
Meridarcha
Bicodarcha
Panifarcha
Fetifarcha
Cohorarcha
Docibarcha
Revularcha
Genocarcha
Detunarcha
Semigarcha
Cinefarcha
Bugilarcha
Caselarcha
Resuparcha
Noninarcha
Dibaparcha
Tabitarcha
Supelarcha
Semaparcha
Semibarcha
Labecarcha
Denunarcha
Malogarcha
Cenodarcha
Rosacarcha
Penicarcha
Pecunarcha
Megalarcha
Ludifarcha
Dilicarcha
Cituvarcha
Capudarcha
Denigarcha
Defenarcha
Tibicarcha
Curabarcha
Duricarcha
Forabarcha
Cosidarcha
Conararcha
Sacoparcha
Venefarcha
Selibarcha
Rorifarcha
Sicararcha
Capilarcha
Ficedarcha
Dicimarcha
Tumefarcha
Cetararcha
Cerimarcha
Hecatarcha
Satacarcha
Canacarcha
Tolutarcha
Susicarcha
Bicinarcha
Fecunarcha
Bisacarcha
Senacarcha
Dupunarcha
Saxoparcha
Minurarcha
Vitigarcha
Lacinarcha
Citivarcha
Democarcha
Daducarcha
Cocibarcha
Colimarcha
Repeparcha
Defosarcha
Carucarcha
Maledarcha
Decularcha
Modifarcha
Tetenarcha
Divularcha
Manubarcha
Lugubarcha
Semifarcha
Turibarcha
Cilotarcha
Rubecarcha
Hexagarcha
Tametarcha
Veridarcha
Viliparcha
Hemidarcha
Direcarcha
Humecarcha
Fatilarcha
Rumifarcha
Semunarcha
Relecarcha
Lavabarcha
Reduvarcha
Bipenarcha
Volucarcha
Monogarcha
Pomifarcha
Baditarcha
Homogarcha
Cataparcha
Refunarcha
Sicunarcha
Funebarcha
Intabarcha
Apsocarcha
Exforarcha
Adsusarcha
Enhararcha
Innularcha
Indecarcha
Altifarcha
Affirarcha
Escularcha
Oblanarcha
Acrimarcha
Ossicarcha
Acistarcha
Chalbarcha
Adsicarcha
Adpelarcha
Octoparcha
Affularcha
Inconarcha
Advigarcha
Impavarcha
Obsigarcha
Immedarcha
Inoblarcha
Adlubarcha
Acrifarcha
Opporarcha
Inmolarcha
Ignigarcha
Inmodarcha
Crabrarcha
Ambacarcha
Amatrarcha
Scaccarcha
Artufarcha
Adpecarcha
Essonarcha
Expenarcha
Ecastarcha
Protrarcha
Adtumarcha
Advicarcha
Inresarcha
Ineffarcha
Prograrcha
Oblivarcha
Pluscarcha
Ephiparcha
Indeparcha
Expecarcha
Exurrarcha
Arusparcha
Incomarcha
Irredarcha
Exsusarcha
Expoparcha
Inadfarcha
Effosarcha
Angiparcha
Arcifarcha
Armiparcha
Adcesarcha
Absurarcha
Inlaparcha
Tresvarcha
Prodrarcha
Abneparcha
Aplesarcha
Accenarcha
Insicarcha
Adsularcha
Exadvarcha
Arciparcha
Infesarcha
Excamarcha
Acricarcha
Inhonarcha
Exhorarcha
Adbelarcha
Appecarcha
Anatrarcha
Exherarcha
Crupparcha
Arillarcha
Immemarcha
Adgesarcha
Offunarcha
Absegarcha
Utrinarcha
Advinarcha
Ulcisarcha
Omnifarcha
Adpicarcha
Inpelarcha
Inabsarcha
Abinvarcha
Incocarcha
Aprararcha
Ensifarcha
Amnigarcha
Adsocarcha
Apperarcha
Adtenarcha
Appicarcha
Albogarcha
Actutarcha
Adlicarcha
Inleparcha
Excocarcha
Excalarcha
Inabrarcha
Abnorarcha
Irrotarcha
Istinarcha
Adcubarcha
Excularcha
Ingurarcha
Admularcha
Irrelarcha
Oratrarcha
Occalarcha
Octobarcha
Atrusarcha
Adsucarcha
Obtecarcha
Assucarcha
Anactarcha
Abambarcha
Idipsarcha
Odontarcha
Irradarcha
Indotarcha
Aterrarcha
Inambarcha
Ecfunarcha
Ascenarcha
Obmurarcha
Intemarcha
Scorbarcha
Addivarcha
Sceptarcha
Innumarcha
Inaccarcha
Attesarcha
Indidarcha
Accucarcha
Utpotarcha
Omninarcha
Urbicarcha
Extinarcha
Aggubarcha
Octuparcha
Inexcarcha
Omniparcha
Antirarcha
Adfirarcha
Indivarcha
Utrararcha
Expisarcha
Amercarcha
Eccisarcha
Encomarcha
Antegarcha
Infenarcha
Intecarcha
Acrufarcha
Affamarcha
Apsimarcha
Appugarcha
Impilarcha
Invicarcha
Infelarcha
Ambadarcha
Enceparcha
Admigarcha
Adtorarcha
Endivarcha
Adambarcha
Adtacarcha
Prognarcha
Acratarcha
Insomarcha
Assicarcha
Inmutarcha
Adnararcha
Excinarcha
Intorarcha
Adsibarcha
Invigarcha
Inexparcha
Infirarcha
Allaparcha
Excanarcha
Obfusarcha
Prosparcha
Onocrarcha
Appacarcha
Abmatarcha
Scammarcha
Adsigarcha
Aminnarcha
Obnoxarcha
Crusmarcha
Abluvarcha
Intesarcha
Echidarcha
Invorarcha
Epicrarcha
Ascalarcha
Expasarcha
Antacarcha
Irremarcha
Armicarcha
Effigarcha
Expurarcha
Undevarcha
Exorbarcha
Emancarcha
Annecarcha
Irrevarcha
Inmobarcha
Adneparcha
Affanarcha
Arrecarcha
Arvecarcha
Intenarcha
Adremarcha
Epogdarcha
Acertarcha
Orgetarcha
Anancarcha
Adrecarcha
Innecarcha
Ampenarcha
Expugarcha
Isoscarcha
Inmitarcha
Obsorarcha
Ableparcha
Inasparcha
Artoparcha
Apporarcha
Everbarcha
Inexsarcha
Oppanarcha
Apsegarcha
Avoncarcha
Allibarcha
Armidarcha
Attegarcha
Effararcha
Agrimarcha
Infinarcha
Astiparcha
Estovarcha
Adsifarcha
Inhumarcha
Impigarcha
Apograrcha
Arnacarcha
Ammixarcha
Innabarcha
Armigarcha
Accumarcha
Insufarcha
Inbecarcha
Inturarcha
Aciscarcha
Insusarcha
Artilarcha
Excararcha
Antiparcha
Aprugarcha
Abantarcha
Ammodarcha
Anagnarcha
Ignifarcha
Absorarcha
Obvolarcha
Inpudarcha
Irrecarcha
Alembarcha
Arcubarcha
Impudarcha
Idcirarcha
Ammigarcha
Adtilarcha
Accularcha
Adpugarcha
Insorarcha
Obrigarcha
Incivarcha
Thessarcha
Adhorarcha
Altiparcha
Plostarcha
Inbelarcha
Indilarcha
Arundarcha
Excetarcha
Omnigarcha
Adpanarcha
Inlocarcha
Inpenarcha
Imbecarcha
Illaparcha
Almitarcha
Emortarcha
Adessarcha
Atricarcha
Accogarcha
Exturarcha
Ecneparcha
Arrugarcha
Exsurarcha
Arcitarcha
Annifarcha
Accerarcha
Addubarcha
Andabarcha
Obsatarcha
Adcelarcha
Oblocarcha
Occumarcha
Exsufarcha
Ontolarcha
Attorarcha
Allacarcha
Alluvarcha
Insurarcha
Inhorarcha
Inmenarcha
Arcebarcha
Intamarcha
Utrolarcha
Exsatarcha
Uxorcarcha
Exentarcha
Accomarcha
Adlenarcha
Igniparcha
Procrarcha
Infatarcha
Adtagarcha
Adsecarcha
Inlecarcha
Apsurarcha
Ambifarcha
Elliparcha
Ignosarcha
Intacarcha
Adoscarcha
Anarrarcha
Asporarcha
Obmutarcha
Incularcha
Admodarcha
Atroparcha
Abreparcha
Triscarcha
Induvarcha
Apsenarcha
Incunarcha
Obsolarcha
Inoccarcha
Assefarcha
Abhinarcha
Adlecarcha
Inlibarcha
Adnilarcha
Aglasarcha
Inurbarcha
Utputarcha
Obtorarcha
Adpagarcha
Allubarcha
Inrevarcha
Obtemarcha
Scintarcha
Immobarcha
Incucarcha
Inordarcha
Octinarcha
Adcumarcha
Alticarcha
Egritarcha
Inlusarcha
Ornitarcha
Crastarcha
Odollarcha
Almucarcha
Incorarcha
Egregarcha
Optabarcha
Immatarcha
Episcarcha
Armifarcha
Inpasarcha
Invesarcha
Incenarcha
Enimvarcha
Exaggarcha
Effularcha
Argitarcha
Arremarcha
Excorarcha
Exsolarcha
Fraglarcha
Obnunarcha
Myalgarcha
Spastarcha
Indirarcha
Illunarcha
Aprucarcha
Ermelarcha
Artolarcha
Imbelarcha
Adordarcha
Assifarcha
Acrocarcha
Adtubarcha
Accorarcha
Adpenarcha
Impirarcha
Irregarcha
Epiclarcha
Exsomarcha
Appagarcha
Inremarcha
Proscarcha
Proclarcha
Aspilarcha
Expanarcha
Annubarcha
Adrotarcha
Inmorarcha
Entomarcha
Adhinarcha
Adnumarcha
Immodarcha
Attolarcha
Insemarcha
Adpacarcha
Arrabarcha
Obfenarcha
Aseptarcha
Inhosarcha
Advorarcha
Attemarcha
Adsesarcha
Scombarcha
Amfitarcha
Inpinarcha
Anxifarcha
Infabarcha
Inreparcha
Inergarcha
Afranarcha
Ardifarcha
Frigdarcha
Aggesarcha
Occenarcha
Adnicarcha
Insibarcha
Opercarcha
Adobrarcha
Acrotarcha
Inrelarcha
Altivarcha
Elastarcha
Ambidarcha
Encolarcha
Inredarcha
Evangarcha
Octodarcha
Obverarcha
Innoxarcha
Eviscarcha
Thapsarcha
Extorarcha
Adfabarcha
Arbavarcha
Acustarcha
Alsidarcha
Ensicarcha
Troclarcha
Inargarcha
Brabrarcha
Anciparcha
Inornarcha
Acroparcha
Ignicarcha
Ascisarcha
Obtunarcha
Extunarcha
Infisarcha
Fragmarcha
Attelarcha
Agnomarcha
Apsorarcha
Utralarcha
Ossararcha
Obvalarcha
Adnubarcha
Attubarcha
Inmemarcha
Aneclarcha
Inmacarcha
Abrelarcha
Abrumarcha
Inhabarcha
Cnestarcha
Amnenarcha
Algifarcha
Ascelarcha
Adpinarcha
Alsularcha
Acrobarcha
Ocissarcha
Energarcha
Inforarcha
Arnogarcha
Immacarcha
Adtesarcha
Artocarcha
Assubarcha
Antomarcha
Obtesarcha
Enigmarcha
Ephemarcha
Adcogarcha
Allobarcha
Chernarcha
Ignomarcha
Invetarcha
Exsanarcha
Agraparcha
Immusarcha
Uberrarcha
Tribrarcha
Utricarcha
Smegmarcha
Adposarcha
Utillarcha
Grallarcha
Annucarcha
Adalgarcha
Accaparcha
Edissarcha
Adfunarcha
Oblucarcha
Proslarcha
Ellebarcha
Inardarcha
Aphorarcha
Alsisarcha
Ossifarcha
Clancarcha
Abindarcha
Alcedarcha
Illibarcha
Ammurarcha
Ecligarcha
Inlumarcha
Stercarcha
Invecarcha
Triclarcha
Adluvarcha
Insenarcha
Argumarcha
Blactarcha
Exindarcha
Octiparcha
Insubarcha
Agriparcha
Argimarcha
Aphararcha
Octusarcha
Agratarcha
Obtenarcha
Ambusarcha
Proprarcha
Arcatarcha
Abverarcha
Ammularcha
Indiparcha
Umbilarcha
Abpatarcha
Arancarcha
Agravarcha
Immadarcha
Opuscarcha
Infucarcha
Exhedarcha
Offirarcha
Indomarcha
Astaparcha
Inoffarcha
Echogarcha
Annicarcha
Anceparcha
Acontarcha
Adcularcha
Anteparcha
Impolarcha
Assibarcha
Immurarcha
Adinvarcha
Embamarcha
Oppugarcha
Impinarcha
Illuvarcha
Inlacarcha
Effunarcha
Problarcha
Abagmarcha
Impugarcha
Exoscarcha
Eccilarcha
Adsudarcha
Ecfacarcha
Scellarcha
Absocarcha
Antecarcha
Aclasarcha
Abligarcha
Obfirarcha
Invinarcha
Excerarcha
Actararcha
Infanarcha
Exhilarcha
Abascarcha
Ammatarcha
Insinarcha
Inobrarcha
Immigarcha
Ensigarcha
Oscilarcha
Oblonarcha
Occucarcha
Excogarcha
Enuclarcha
Atlanarcha
Ininnarcha
Inretarcha
Inrecarcha
Acrolarcha
Algebarcha
Practarcha
Admorarcha
Antevarcha
Pragmarcha
Effacarcha
Epitrarcha
Anamnarcha
Ingigarcha
Epistarcha
Inobsarcha
Artifarcha
Adlaparcha
Expalarcha
Errabarcha
Antimarcha
Alcalarcha
Exsisarcha
Impacarcha
Adtemarcha
Adtolarcha
Offularcha
Brasmarcha
Intolarcha
Exsuparcha
Ossucarcha
Inrefarcha
Tranvarcha
Adverarcha
Adperarcha
Adfanarcha
Insoparcha
Obambarcha
Chancarcha
Adfamarcha
Innuparcha
Apoplarcha
Ectenarcha
Aggenarcha
Adrenarcha
Exhonarcha
Inseparcha
Inpurarcha
Admutarcha
Apsolarcha
Agricarcha
Effinarcha
Apposarcha
Ambecarcha
Enuntarcha
Infacarcha
Arcelarcha
Adaggarcha
Avuncarcha
Unetvarcha
Ecliparcha
Indifarcha
Illeparcha
Adnecarcha
Alcibarcha
Epigrarcha
Adgenarcha
Obsecarcha
Obsurarcha
Omnimarcha
Exsorarcha
Edulcarcha
Innasarcha
Assudarcha
Alectarcha
Anaplarcha
Inherarcha
Ignobarcha
Excucarcha
Admurarcha
Eclecarcha
Encenarcha
Affabarcha
Indubarcha
Adrumarcha
Inregarcha
Affunarcha
Octacarcha
Extiparcha
Antefarcha
Advecarcha
Plascarcha
Adnunarcha
Adcucarcha
Adselarcha
Obnuparcha
Adfularcha
Agnicarcha
Exorcarcha
Effemarcha
Anastarcha
Adporarcha
Ablacarcha
Omnivarcha
Irrefarcha
Inperarcha
Adlocarcha
Indevarcha
Adnularcha
Insalarcha
Induparcha
Incesarcha
Anaclarcha
Adsenarcha
Excomarcha
Exasparcha
Adlacarcha
Abnocarcha
Asbesarcha
Optumarcha
Apercarcha
Adgubarcha
Infunarcha
Adcomarcha
Alismarcha
Adhosarcha

## Sheet: 9,970 bacterial genus names
Necopana
Colepana
Tiguraria
Domigosa
Cocibosa
Casigaria
Minagia
Defarosa
Locupula
Dehinana
Resulia
Nugacida
Semunula
Metapana
Semodana
Laxitana
Bicinella
Vecorana
Culilaria
Foricaria
Retecida
Taxilella
Denecaria
Lanifula
Demulia
Televaria
Volubia
Musulosa
Rinocana
Cinipana
Lenunida
Feditula
Deforana
Decunula
Nutamella
Ceracana
Desonella
Satacella
Sonivana
Cululosa
Levifella
Legifula
Manubaria
Cibarana
Subadana
Funamana
Bifisia
Ciminosa
Defacida
Futatida
Rubefida
Nicotella
Cululella
Cohorana
Venunella
Conipana
Semimosa
Bicoria
Defunana
Lacinana
Veridula
Nocumosa
Lapilana
Vagabana
Remedella
Rubigaria
Colutosa
Melilana
Tabifella
Resalella
Monocella
Medimella
Homicia
Taxilida
Sitelida
Cenodia
Forinosa
Conifella
Revecaria
Panifida
Loripella
Rosacida
Decitella
Tolutella
Vivifida
Bipenula
Defanosa
Detesana
Tenemana
Disidaria
Cerararia
Decomula
Cocodaria
Democia
Decomaria
Nivomana
Didacella
Colepida
Bisacosa
Minurella
Gasifia
Desurosa
Catobella
Denigella
Ducilana
Renavosa
Revecida
Baropana
Timefula
Bipenida
Repagana
Tomogida
Recucia
Semodula
Fuligosa
Dehisana
Cetaria
Cacopella
Fuligana
Didacia
Nocumida
Peradosa
Denicida
Tumefida
Semunella
Cisoraria
Volucosa
Turifosa
Citiparia
Pavicida
Repurana
Diminida
Decinula
Sonabida
Curabana
Cerucia
Navifida
Sonabella
Ceracosa
Sitelia
Debucella
Latibosa
Tomogosa
Buxifia
Caselida
Ridibella
Delapella
Fidenaria
Morigosa
Mimogella
Salubia
Vitifaria
Detosella
Capucaria
Cetararia
Bucolaria
Fecunula
Bacifaria
Ficedosa
Rubefella
Dehonella
Remedana
Demogosa
Menapida
Nitelia
Cululana
Detotula
Susicella
Cimelida
Viburella
Colimella
Bipenaria
Doxolaria
Vehemida
Cenobida
Viripana
Fetifosa
Xeroposa
Denavia
Divolella
Habacula
Bigaria
Furibida
Milipella
Tametana
Purulana
Navifana
Bulapida
Desorana
Bucelida
Colipula
Desulida
Lenocella
Bipinaria
Rutabaria
Bipataria
Hirudula
Depupia
Depicaria
Sanabida
Colimana
Risibana
Cosidida
Mirabula
Detorida
Nefarida
Siticia
Lavacosa
Dehonosa
Pepenella
Denupana
Colipia
Sonivella
Menapella
Gemebosa
Saxifida
Hexagella
Tabitana
Desuposa
Resalula
Cilotula
Rorulosa
Cacopia
Buxanosa
Vecorula
Catagana
Siminia
Homunaria
Loriparia
Vehemella
Virecosa
Ludimula
Capudana
Labecella
Ficedana
Rumifia
Cerofella
Decenia
Bucolula
Bicipella
Dehonana
Bucolosa
Fatilella
Notacella
Bimetana
Peridaria
Haricia
Monimella
Repagaria
Hecatia
Subodana
Refularia
Solifella
Bipenella
Facunula
Peropana
Delapia
Decenella
Cadurella
Nugivella
Dilogosa
Sugilida
Lavacula
Defulida
Depetaria
Rudicella
Lupanella
Letifosa
Denomula
Panopida
Resacula
Defarana
Nocumella
Solifida
Lutulosa
Visocaria
Carucella
Satacosa
Visibia
Desurella
Tenebosa
Molecana
Nidifida
Saxopella
Fusifella
Citocaria
Casigia
Defacula
Peradella
Modifida
Perexula
Democaria
Nosocosa
Denicosa
Dilogula
Homulosa
Lucerana
Fidenella
Hirunaria
Ratifella
Celamaria
Perexida
Decamella
Meridella
Rosarella
Vinolida
Luculosa
Buxifaria
Valefula
Demularia
Venefia
Dilicella
Verifosa
Depelida
Ducilida
Refacia
Peribosa
Curotosa
Malagaria
Fuligaria
Cicatosa
Depasida
Perabida
Manubula
Revecula
Dedigia
Murelaria
Bipalana
Maledosa
Dupunia
Turicaria
Lanigana
Cisalella
Holovida
Bucelula
Gabinosa
Desoraria
Reforella
Semilida
Totidula
Repepula
Papilula
Malogia
Resupia
Legifosa
Vigenana
Delacaria
Luculella
Telegaria
Halucula
Tubicaria
Papilia
Valefaria
Verecella
Favilella
Domipida
Defenosa
Sacopula
Letifaria
Recucula
Hexaposa
Lenunana
Redacaria
Redacia
Feditosa
Salubana
Detepida
Feficosa
Tirocana
Manibosa
Vinolella
Subodida
Fumifaria
Resurula
Pecunella
Curacosa
Bigemia
Videlula
Depocosa
Vacilella
Celumana
Nimirella
Monopida
Siligia
Nugivida
Nubifaria
Malogida
Cucurosa
Pinigana
Colubula
Bugilella
Homolia
Tubicosa
Sicubida
Hecatosa
Monodosa
Patibella
Defunella
Rudicia
Feditella
Defacana
Nubifana
Catilana
Venunia
Tabifula
Nocumia
Solifula
Cisalana
Latibella
Cinefosa
Nicomella
Beneparia
Recogosa
Dinupia
Locupia
Bicorida
Desuparia
Decinia
Curabaria
Hexaparia
Dicimosa
Baditana
Relenosa
Debucaria
Megalella
Refulia
Cacomaria
Semifaria
Dinuposa
Documaria
Terebana
Repecula
Culibula
Vehicida
Duponaria
Depupella
Fetifula
Manubana
Genufia
Demulula
Cenobella
Delebida
Catalida
Fatifella
Meridosa
Derelia
Cenodana
Depacida
Tirunia
Defetia
Fatifosa
Rudecaria
Satacaria
Voragida
Bicinaria
Totidia
Relapula
Medimula
Relenana
Dicabella
Forinella
Remulella
Derunella
Bisularia
Paracia
Viriparia
Latibia
Hibisella
Desomaria
Pinacella
Monopella
Diludida
Pimenida
Horomana
Subodella
Luculida
Solacula
Volubella
Resulula
Vituposa
Demulida
Domicosa
Pimenosa
Metabida
Celamana
Rosacosa
Casigosa
Solacida
Seposana
Colubida
Repurella
Dilibosa
Recumaria
Calipella
Caravula
Defosella
Catalia
Vinolaria
Rosararia
Bigemosa
Dicibula
Repecosa
Sacoparia
Labecia
Viripula
Coloparia
Bigemella
Malogosa
Lacularia
Panifia
Fetulida
Fetutula
Sifunosa
Resacella
Calipula
Retunia
Desepula
Defosida
Vitupula
Viginaria
Holovosa
Baditaria
Vocifosa
Dehonaria
Dilibana
Megalana
Fidenana
Venefosa
Semifia
Colipella
Divulosa
Tomacia
Deforosa
Calipida
Conubana
Cosigia
Fetifana
Maxumaria
Repeparia
Solipia
Hegumosa
Cocibia
Sicarula
Lametaria
Fefelula
Selecida
Cemenella
Citivula
Domicula
Detoraria
Cucuraria
Nivomella
Domabana
Homicosa
Femelaria
Ciniparia
Semigana
Corocosa
Negotaria
Venefaria
Desomella
Tirunana
Cimitella
Curotia
Derunosa
Categana
Lapilula
Decataria
Vehemia
Conarosa
Biparia
Viburana
Dicimaria
Dilecula
Bimetella
Fetutana
Dupunella
Cenodosa
Fuligida
Bovicida
Relecaria
Cohorella
Megalula
Coleparia
Cinipula
Malagosa
Dimacaria
Denavula
Paropula
Curacana
Vicatella
Rurigosa
Navicana
Demogia
Feditida
Hexagida
Siticana
Homunula
Gerunida
Lametosa
Semimella
Cimitosa
Cerucella
Solipana
Parocella
Momoraria
Fetulia
Volucana
Desepia
Vitabia
Deparida
Dimacella
Tubicida
Decenosa
Selibosa
Lorarida
Tegimosa
Categula
Lubenaria
Pecunida
Vacilia
Devecia
Solivella
Ruricaria
Semigia
Bucelosa
Coloposa
Patibia
Nugacana
Nocenella
Filifida
Legifana
Casigana
Biveria
Cerarida
Tibicosa
Vacilosa
Beneposa
Nefarosa
Negidida
Subofula
Defasia
Lucelella
Gasifula
Coliposa
Repuria
Sicararia
Carunana
Biparida
Funamia
Curacella
Detosida
Nugigella
Tirocaria
Maligaria
Caselosa
Humecula
Capucosa
Rudecana
Siligula
Bifarosa
Relenia
Noninella
Cinefana
Dimacana
Defulia
Telegella
Homolula
Momorella
Penecaria
Denigana
Direcula
Tabifida
Penecula
Podagula
Hegumida
Casabella
Sarabosa
Tumefana
Bimotaria
Pacifida
Hirunella
Nugigia
Dimadaria
Taraxana
Menapula
Depoposa
Loriposa
Celamella
Famelula
Visibella
Cinefia
Satacida
Dececana
Nutamida
Cucurella
Patibida
Virecella
Nosocida
Cenodula
Decupula
Selecia
Semodida
Homicaria
Rarefula
Delubana
Semimula
Herinaria
Doxolana
Ludifosa
Detosaria
Redacida
Sicubula
Locupida
Pinacaria
Cocibula
Lucelaria
Buxanana
Modifosa
Rubicula
Curacida
Sacoposa
Vepalaria
Derecaria
Sitelula
Homogaria
Defularia
Divolida
Maledula
Conarula
Conipula
Humecana
Maxilosa
Maledana
Cenotosa
Cerimaria
Depicida
Tabitia
Decacosa
Catagida
Dapifana
Celumaria
Dececosa
Cimelella
Laculosa
Genocula
Tibicula
Habacosa
Monimida
Vicecosa
Verifida
Tirocella
Manomia
Defalaria
Cicilida
Nivomosa
Televosa
Ludibella
Munifida
Pabilella
Venunana
Cadurosa
Codifana
Decitosa
Fumacella
Malagia
Denixula
Culibida
Mahelula
Cosidaria
Pavicana
Vilitula
Domigula
Lanugella
Futataria
Pinacida
Negidaria
Diponia
Viginida
Ludimaria
Virecaria
Rubefia
Funivella
Penecella
Capabula
Senacella
Vavasida
Denixida
Sotulula
Habacaria
Manubosa
Lanigella
Duricella
Gasomula
Viliparia
Velifia
Defesida
Cilotia
Turilaria
Defosaria
Melilida
Saburida
Benivida
Tenemia
Cocodia
Monogosa
Pacifaria
Luxurella
Bifisida
Lucelosa
Solivana
Detotida
Catilida
Regifosa
Homagida
Bonitana
Codifella
Cacomella
Cunabaria
Bisulella
Depecaria
Fumifia
Pabilaria
Locelana
Dilogida
Periposa
Dicimia
Manibana
Papilida
Levidia
Nugacosa
Detenella
Catobana
Viragula
Lupanida
Seniparia
Senipia
Totidaria
Decapula
Luxurula
Hecatida
Sonipana
Secunaria
Refulosa
Deparella
Nimirosa
Subabaria
Lucelia
Socagia
Repurosa
Pulegosa
Velifida
Hemitaria
Rutabana
Fetutosa
Cibararia
Telefana
Decamaria
Bucelella
Subacosa
Visocosa
Maxilia
Cicaria
Monumula
Licenula
Refocella
Pudibana
Celamula
Vocamana
Maledida
Demagana
Capilida
Milifosa
Cenobana
Categida
Buxifana
Semibida
Bisulosa
Camilaria
Fumacana
Pedeparia
Vinolia
Halucosa
Subabosa
Solacella
Seposaria
Capucana
Nugivana
Relaposa
Revecana
Locelia
Pudibella
Resacida
Redacula
Musulella
Desurida
Diludana
Venefella
Solacaria
Carunaria
Colutula
Relapida
Rurigella
Decapia
Selecella
Noninula
Lucelida
Fatifana
Dapifosa
Manomosa
Xenoposa
Monacana
Benivia
Cenacia
Maxilida
Redacella
Nocenida
Bicipia
Subadia
Tenebia
Vatilaria
Tametella
Lenocia
Xeramosa
Peripida
Tomogaria
Bimotana
Bisulana
Ranunida
Catecaria
Caravida
Subodia
Cepurana
Turibosa
Hemidana
Subadida
Capucella
Meridida
Nubecida
Recocella
Xeramella
Rubicana
Faticaria
Dicibella
Tenemosa
Dicimida
Robigida
Demigida
Cibarula
Melilosa
Herinana
Cacomosa
Nugivaria
Munifana
Venucia
Cuferana
Culibella
Denecella
Bicalula
Casigella
Sugilia
Capilana
Virecida
Relenula
Categaria
Duponosa
Benemaria
Telegia
Legifaria
Tomacana
Rumifula
Mirifosa
Celamia
Recomosa
Bicaparia
Senipana
Dimadana
Decupana
Bipinana
Terebaria
Notabula
Bimetia
Funamida
Vigenida
Subinella
Mutabia
Patibosa
Tumefosa
Divulella
Bipatana
Visifosa
Defalida
Carucaria
Tegumosa
Vavasana
Fibicia
Depelula
Panopella
Citipia
Divolaria
Reduvida
Pomifana
Vepalula
Denupula
Cocolula
Relenaria
Cuticaria
Peridula
Siminosa
Detumia
Hirudaria
Cadavia
Fetifida
Cilibida
Femelula
Citivia
Manufida
Defania
Mimogana
Susicaria
Seposia
Rosacula
Foricia
Denomaria
Venefula
Resupella
Subabella
Malogula
Novilia
Levifia
Petulella
Noninida
Pocilula
Semidia
Dicabida
Negotosa
Tumefella
Demogaria
Benemana
Minagula
Cepurosa
Vatilosa
Refocaria
Murilella
Detotosa
Vigenia
Colimula
Manufaria
Tametida
Dicibia
Catobosa
Semifida
Retecaria
Rorulella
Forinana
Biverida
Lucifana
Mavorella
Xeropella
Curotula
Rubecella
Hexapula
Redunosa
Nefanella
Coturana
Forabaria
Benifida
Doxolida
Tomogia
Lucifida
Socagula
Senacida
Dilemaria
Repagida
Lucelana
Devecosa
Culigosa
Mirifida
Semimana
Nubigida
Locupana
Figilana
Benivosa
Funebella
Carecosa
Nubifella
Cenodida
Depubia
Denoria
Fidenida
Fatilida
Lenunula
Locelida
Cululida
Genocia
Vepalida
Ficularia
Tenemula
Favilida
Demulana
Nefanana
Catabida
Funebia
Bonifosa
Celumosa
Denomosa
Coturida
Sotulana
Monodida
Celumula
Domipana
Telegosa
Pinigia
Hirunida
Citipella
Penuraria
Semimida
Semibella
Fatilula
Recucaria
Venucella
Bifisana
Hecatula
Domabosa
Conamula
Fumacaria
Navifella
Vitigella
Lacinosa
Baditosa
Democula
Metapia
Hemitia
Vocifella
Medimaria
Letifula
Coturella
Subinia
Vehicia
Divulula
Depasosa
Vicecia
Tolutana
Conigana
Duricida
Dilicida
Ducilaria
Homolaria
Semodosa
Desuria
Rosacana
Repeposa
Deseparia
Pepenida
Catalula
Mimogia
Dehinula
Citiposa
Catapula
Cobalana
Luticida
Buxifosa
Bicubaria
Catafella
Colubana
Cohuraria
Manufia
Turilana
Buxanula
Lorarella
Resalia
Dilecosa
Cimelosa
Depuparia
Levifaria
Vanitella
Biverosa
Curabia
Satacia
Sicinula
Deteposa
Tabitida
Depicosa
Caliposa
Monogula
Decunaria
Cilotella
Revecia
Sonivula
Vanitida
Genufosa
Reduvosa
Papilella
Denecia
Sugilosa
Cuticosa
Velivula
Linigia
Bipinella
Vitigida
Sifunaria
Colutida
Derecia
Conamaria
Pavimida
Homolella
Depubula
Repudula
Depecosa
Dibapula
Refacosa
Voragosa
Cohurella
Defulosa
Gasomana
Vigenaria
Desucia
Defacella
Nugigula
Dececella
Rinocula
Halucella
Defanula
Cuticana
Defulula
Decamosa
Derelosa
Decacula
Rorifida
Catabella
Coliparia
Lapicella
Resacana
Desacana
Modifaria
Rubecaria
Fatilaria
Mimogosa
Sarabana
Capucia
Solacana
Lorarana
Benemida
Nefanosa
Feculana
Viripida
Feficella
Desuraria
Valefia
Negotula
Derecella
Vicatosa
Defanaria
Dicibana
Tenilaria
Curacia
Coninula
Corocida
Papavosa
Sotulia
Pomifella
Nubifosa
Nitelaria
Fumifula
Homulula
Telegula
Megalia
Docibaria
Cilicida
Vicecaria
Direpella
Repecia
Totidosa
Nosocaria
Peribia
Recoraria
Vivifosa
Lacinida
Vagabula
Pepenana
Peradana
Favonella
Lanugaria
Cucurula
Futatula
Denicella
Dimidosa
Herinosa
Diponana
Sanabia
Conopula
Lugubida
Cetarula
Dupunosa
Funebosa
Cosigaria
Feficida
Depasaria
Reforaria
Tirocida
Gasifana
Pinifosa
Medimosa
Butubaria
Bicipana
Domigida
Dimidella
Cepulia
Lucularia
Tomogella
Dececia
Depubida
Depubosa
Casigida
Mirabosa
Semipida
Bisacella
Depecia
Haricana
Deparosa
Desepella
Divorella
Sicunaria
Feficaria
Desomana
Secunida
Benifia
Podagosa
Xenodia
Calipia
Pepenula
Negidia
Colapula
Saxifana
Pacifosa
Dinupula
Bimotosa
Deforaria
Secunula
Decunia
Lavabia
Bicubosa
Bicodida
Palifula
Novilosa
Habacida
Volunida
Reforida
Disidella
Repepia
Munifula
Reduvana
Vicecida
Resacaria
Colapida
Citocula
Dapifula
Catecella
Cicilella
Depetana
Monogia
Macilula
Tomacella
Maxumida
Sitelosa
Nubecia
Penicaria
Manibida
Nitelosa
Defetella
Viripia
Didacana
Tibicia
Dapifida
Munimida
Taraxida
Demagida
Subacana
Lapilaria
Dinupana
Sicunia
Minurana
Sacomana
Hexapida
Categia
Bipatia
Malagula
Tabitosa
Ruricula
Diponida
Televia
Bipinosa
Cimitida
Dedigella
Conopida
Conubula
Noninaria
Cotenia
Podagella
Cisalaria
Monimosa
Morigella
Papilaria
Semipana
Tabifia
Fefelaria
Diritosa
Dicibida
Conipia
Bimetula
Timefella
Doxolula
Fiducaria
Lapilella
Fatifaria
Forabida
Relapia
Cocibida
Dibapia
Musulia
Relapana
Derunana
Letifella
Diponella
Lutularia
Cinefella
Retecella
Vanidaria
Pulegia
Bovicosa
Doxolia
Sicunosa
Saxifaria
Legifida
Vinacella
Bifarella
Vatilana
Sanabosa
Ruricella
Nehalula
Refacida
Pocilella
Bonifida
Recocana
Gemebaria
Verecida
Catabula
Docibana
Visibula
Denixella
Forabia
Supelana
Macilella
Fecunella
Venucana
Linigida
Bicodula
Pimenaria
Supelella
Regigana
Malifana
Vecorosa
Genocaria
Diritida
Vinacula
Dilogana
Susicula
Lorarosa
Vitifula
Binocia
Carunula
Vacilula
Malifula
Bimotia
Lavacaria
Palifella
Cenodaria
Direpida
Tigurella
Celumia
Benevula
Holisana
Corocaria
Megalida
Detososa
Resuria
Panifana
Subucida
Betacaria
Refulula
Catobula
Visocana
Semapida
Cisorida
Casabaria
Recomula
Detenaria
Depopella
Tomacaria
Socagosa
Cocolella
Visibana
Cicatula
Recorana
Nocumaria
Delubaria
Divorosa
Defosia
Mavorula
Nocumana
Munimella
Figilula
Bulapana
Ridibida
Semigella
Verecosa
Lucubia
Ceromida
Giganula
Benepia
Bicinula
Malifella
Monimana
Feculida
Cuticida
Robigosa
Vagabida
Direpana
Benevida
Pedifia
Nicomula
Categosa
Holisula
Sicinosa
Palifida
Refinia
Necubana
Catapida
Monumana
Manibaria
Hexagaria
Nucifula
Denixia
Laxitella
Cataposa
Coturula
Lucifia
Delecella
Peribaria
Hecataria
Feculia
Democella
Fibicida
Haricosa
Penurana
Colapia
Demadida
Vepalella
Vinulella
Conabula
Penecida
Verecia
Volunosa
Genufida
Dinupella
Regifana
Dilicana
Fusifula
Peracula
Tegumaria
Bifarana
Nefanula
Ceracella
Semifula
Codifida
Monopula
Vagabosa
Resuposa
Nosocia
Dilemida
Daducaria
Ciminida
Pomifida
Recucana
Tenilia
Nutamia
Bacifosa
Domabaria
Conibella
Cerebida
Recomella
Penurella
Lanifaria
Luticella
Relecella
Feculula
Peribida
Catapia
Cosidosa
Funamula
Demagosa
Bisacia
Siminida
Momorana
Desonosa
Minagida
Vinolula
Bicapula
Dilemana
Malogaria
Purularia
Letifana
Munifaria
Levifana
Denunula
Lucubosa
Genufella
Conabia
Negotana
Velivana
Dilibaria
Fecunana
Nugivula
Detepula
Cerevula
Xeropula
Salubella
Carecula
Lanugula
Homicula
Recumana
Domabida
Pecunaria
Vivifaria
Catagula
Reduvula
Homagana
Ceracaria
Conibana
Sanabula
Tenilida
Duponida
Culigida
Renavida
Notacosa
Catecana
Denunida
Diluvida
Direposa
Duricaria
Vilipida
Cacomida
Desupella
Pacifella
Nubigana
Delucaria
Docibula
Lutulida
Bacifia
Solifaria
Vatilella
Catapana
Conifula
Sicarella
Dilemella
Denomia
Cerifula
Rorarana
Sacomaria
Semaparia
Conoposa
Lapilosa
Veridaria
Cocodida
Fusifana
Melopia
Lubenula
Dicibosa
Manufana
Videlosa
Tabifaria
Ridibana
Binocida
Dupunana
Culilana
Sicinida
Petulula
Notacida
Tenilella
Bigarana
Lucerida
Rorulia
Lanigula
Lucifella
Domabula
Vavasosa
Dicabana
Disidana
Remedula
Genufana
Tenemida
Subadaria
Nefarella
Peridana
Deculella
Derunaria
Desucella
Conarida
Favonaria
Desacia
Dehinaria
Sonipida
Soliposa
Fatilana
Pavicosa
Denavana
Didacaria
Forinula
Capudula
Selibaria
Dapifaria
Semipia
Molecida
Cotenida
Sicubaria
Cituvana
Penicella
Venucaria
Sicinia
Cetarella
Morigia
Cenotida
Dedigaria
Demagaria
Bugilida
Vigenosa
Ratifana
Panifella
Cadavula
Ciminaria
Peridida
Notacia
Verecaria
Volubosa
Denuposa
Maxumia
Velivella
Dibapella
Gerunula
Visocella
Gemebia
Cibarosa
Perabana
Vitigaria
Cibicella
Resulosa
Detenia
Denorida
Sifunida
Corocana
Derelaria
Laxitula
Malifia
Dilecana
Hexagula
Conibia
Refunida
Voragia
Turifia
Delacida
Vilipella
Mavorosa
Resulida
Documosa
Semaposa
Linigella
Tenemella
Catocosa
Semidula
Redunaria
Cituvosa
Subodaria
Levifula
Culilella
Gasomella
Horomella
Hibisia
Metabosa
Morigaria
Necopella
Coninida
Funivaria
Telefula
Cuferida
Volucula
Lutulana
Direcida
Catafosa
Depecana
Bipalella
Totidella
Subadosa
Vacilana
Luculana
Pulegaria
Culilida
Macilaria
Repudaria
Nubigaria
Mahelosa
Capudosa
Sicunella
Notabosa
Papavula
Cicatida
Nocenaria
Melopella
Lenocula
Derelella
Holisella
Peroparia
Pedepia
Taxilia
Demogella
Lugubosa
Coniparia
Monumaria
Divolosa
Colepella
Cicarella
Depubana
Subabia
Conararia
Canacaria
Conabella
Timefana
Ranunana
Canacana
Detecaria
Menaposa
Melilella
Manupella
Cerifida
Coturaria
Cenacida
Semifosa
Devecula
Senacosa
Ceracida
Peropia
Horomosa
Desomida
Cibarella
Pudibia
Serotella
Vecoraria
Cimitia
Renavia
Ranunosa
Miliparia
Cosigana
Cosigosa
Bipinia
Pavimula
Xenodosa
Homolana
Divorida
Catocia
Nehalida
Decunida
Vatilida
Xeramia
Bigemida
Canacia
Sitelella
Solivula
Cohorosa
Rubecosa
Bipatosa
Cenotia
Benemia
Rurigia
Murilida
Xenopia
Detumosa
Vehemosa
Saxopana
Remularia
Bucelia
Pulegana
Homulida
Lapicia
Futatosa
Duponia
Cemenida
Homogida
Dibaparia
Selibida
Cobalella
Direpula
Duricosa
Maxilella
Rorarella
Dicanana
Serotana
Fecunosa
Denicula
Melilula
Monocosa
Tirunaria
Cunabida
Lupanana
Sarabida
Peribella
Decacaria
Xeropana
Perexia
Semipella
Nitelida
Denorosa
Hibisosa
Recumosa
Cosidula
Maligana
Levidella
Refinella
Solifana
Cerevella
Domicaria
Fetutida
Cohurula
Homilida
Semilaria
Necubula
Repecaria
Rarefosa
Sotulella
Cerarella
Delapana
Benepula
Fumacosa
Siticosa
Turicida
Velivida
Coturia
Taxilaria
Pedepula
Funamosa
Sacopana
Bicalaria
Mirabida
Doxolosa
Fiducosa
Paracosa
Recogula
Forabella
Cerimella
Saxopia
Tametaria
Colapella
Perexella
Sicarida
Revulida
Decinosa
Bisulula
Tirocula
Regifella
Lenimula
Cerucaria
Rubicia
Vicatida
Conabida
Demogula
Ciniposa
Monacia
Monodana
Bonifana
Dilogella
Redunula
Bicalia
Nicotaria
Decapida
Rorulida
Rorifosa
Masocana
Telefella
Perabosa
Cululula
Decucida
Minagana
Viragaria
Bisacana
Benifula
Colimia
Dupunida
Catagaria
Didacida
Depecella
Democosa
Viginosa
[truncated: 7,970 more rows]

## Sheet: 48,530 species epithets
calipimonas
recumatica
gasificula
daducitoga
rudecitoga
negiditudo
conarimonas
capabitica
penecitia
regifugo
ridibax
morigitica
detenitio
foricago
catocilega
vecoritura
subofivita
cenacosa
dicimitia
ludimitia
volubitia
defosicula
cacopibula
cadavigena
virecessa
pacififica
laculibula
vigenax
redunicella
megalastra
saxificella
mavoressa
cocodigena
genocigena
salubastra
lametitia
derecitia
casigigena
solivimonia
cacopimonas
femelosa
dececago
direpetta
rudecifica
mirifimonas
megalilenta
nicotitrix
dicibibula
ranunitoga
carucitica
dinupitudo
hibisisca
lenunimonas
rudecimonia
deculivita
cetarago
penurosa
femeliforma
repepitudo
divolimonia
cilicitura
vavasitio
fetulitio
catagilega
pacifastra
bimotitas
vinacessa
depupugo
venabitrix
dilecax
resacosa
cerevugo
susicentia
revulisca
vitigiforma
bovicax
colutitio
totidatio
facunibra
negidatio
benemicella
macilitura
vocifetta
susicugo
laxitosa
nubigilenta
bucelicula
detuniforma
betacicella
detenentia
lenunisca
negidivita
viginugo
reduvilega
resalitica
duricisca
detecentia
derunimonia
funivitio
pocilitia
revecax
cilicastra
dirititura
cunabetta
verecitrix
tumefitia
taraxessa
nugacilenta
malagivita
diluventia
denupilenta
penuritudo
ceraratio
relenugo
televessa
biparax
senipicula
tiguratio
desomitio
saxifugo
cepulitrix
recomitica
semibigena
forabisca
didacax
cacopicella
semunugo
venunitrix
venefetta
cucuratio
domabibra
colubitas
colutitas
genocedo
telefatica
loriposa
telefitia
nimirago
nubecitudo
siligimonia
dececilenta
ridibatica
detorastra
redunitrix
tabitax
peripibra
lapicosa
lenimax
bimotifica
miracitura
dicimitio
necubitura
decitibula
semivivita
sifunatica
viburitica
letifibra
favonimonia
cosigivita
totidimonas
duponastra
revulastra
vehemetta
bicapilega
denigedo
categitio
nicotitura
minuritia
lupanugo
sitelatio
musuletta
meridatio
lanifosa
malivitia
penecosa
murelitoga
giganitoga
delucetta
lavabimonia
dicibicella
defarago
benifedo
depacastra
defulitia
minagigena
lanugibula
dimacitica
catapessa
recogibra
cilotilega
pacifessa
pinigigena
lanigicula
pacifousia
catilivita
repudetta
venucicula
paracitio
rudecilega
rorarifica
bicipicula
detecedo
haricitoga
defeticula
catobitura
cetarimonia
desulitica
meridibula
depasiforma
demagitas
herinitura
baditastra
homicisca
sonabibula
laxiticula
peropibra
siciniforma
macilitrix
desomousia
fiducilega
renavitudo
coturitura
binocessa
curacitia
cocibilenta
dilemimonas
direcago
homulatica
sicinilega
daducitas
rinocivita
lucifago
volucifica
recomibra
domipitudo
denunugo
cicatousia
bifisimonas
vehicitio
solipisca
vocifago
daducicula
laculatio
voragitrix
tibicibula
colimastra
cenodibra
binocicella
fetutigena
forabedo
pepeniforma
cicaritoga
hirunitura
horomilega
rosacedo
siticibra
defetedo
ludibilenta
cohuritas
lacinimonia
subinedo
vocamitio
sotuledo
dececugo
pavimessa
semunicella
colubousia
vecoribra
bifaribra
vocifax
selecitura
hecatibula
saxifitas
hexamax
resulitura
ludimitoga
bisulibula
denigetta
vicatitia
viragatica
nivomiforma
decinigena
pomifitas
bicubitura
notabitas
reforax
nosocitio
conifilega
catagitica
depicicula
cenodiforma
labeciforma
laxititoga
bifisitio
lucubugo
citipatica
venefivita
perexilega
hirunilega
notabitio
hexagatica
cuticimonia
reduvosa
resupilenta
xenopitas
luxuratio
disidibula
repecimonas
demulilenta
milipitrix
subaditia
rudecousia
terebimonas
lapilivita
docibimonas
muriligena
nitelax
domabilenta
homagicella
capilatio
pinifitas
latibax
capudilega
conabibra
diludilega
nicomitrix
maxilatio
medimousia
cocoditica
daducitura
detunastra
cibarilega
vepalatio
sicarifica
veneficula
leviditio
hexagibra
ducilugo
lucerax
nehalatio
divolicella
buxifitoga
viripitoga
recocitura
disidatio
roruledo
colimax
milipetta
papilitrix
mahemitrix
reduvugo
holovitia
mavorax
detosimonia
resacitica
penurilenta
colutentia
bisuligena
dicibivita
tirunitia
legifatica
lanigisca
demogitura
velififorma
papavimonas
relenitas
retunentia
cadavedo
gerunentia
homunilega
homunivita
divolentia
notacitas
lacinatio
bacififica
decatosa
fefelitrix
deneciforma
biparosa
dibapedo
homogimonas
rorarisca
metabosa
cerifitoga
tibicimonas
rubicax
diminibula
tegumisca
cohoribra
panifatio
fatifitia
lupanifica
nitelibula
derunitia
pericitica
resalicula
dilacifica
divorimonia
celamibra
denupastra
maxilicula
conifitura
categax
roraretta
pinifugo
morigifica
conibitia
dicimax
nivomitrix
pinigilenta
cepulitudo
delapitura
xeramessa
conibiforma
desepastra
locupastra
lavacago
palifimonia
conopitura
bulaposa
genufigena
depetitrix
democisca
pacifetta
metucitia
catecimonia
casigimonas
sanabimonia
didacilega
nosocilega
cucurago
velivigena
nefarilenta
fuligimonia
timefatio
ciminastra
vacilitoga
direcax
vitupedo
hemitousia
cepulivita
desonimonas
peripimonas
diriticella
robigitas
nivomatio
benemitoga
cepuribula
vavasugo
lenimastra
holisentia
cimititoga
redunentia
vanidivita
dehinitrix
decupitrix
nidificella
purulago
depubitia
curacitura
nosocugo
venabosa
resaciforma
reforedo
relapimonia
cululitas
nefaritudo
hexagetta
fatiletta
feditastra
vilitastra
rutabitudo
documitio
fumacentia
semibitio
famelisca
manubousia
decacitica
munifimonas
catecicella
paralitura
retecigena
seposifica
risibatica
lupanastra
munimisca
decapibula
bugilitura
semimiforma
levifessa
solacugo
benevitudo
rareficella
defasitudo
fetutimonia
musulessa
feditisca
catilisca
robigicula
cituvitia
recoratica
turifatica
halucitica
feditax
nugigitio
metabibula
regifessa
peridicella
solipousia
turicicella
cerimetta
cilotetta
cacalugo
noninitura
bacifugo
semapiforma
sonivitio
depocicula
cululitio
catapiforma
cicatibula
desomatio
lorarigena
xenopitrix
semimessa
cohuribula
vitupitura
sonabimonia
vanitedo
nosocessa
nubecedo
nugigosa
nocumilenta
cohurentia
papiliforma
pabilatica
bonitivita
morigax
vinulitia
cunabicella
hecaticula
cicaritica
lugubibra
lenunitia
cosigitia
latibosa
tomacousia
pomifitudo
monocitia
revulago
mahemicella
didacatio
vocifitica
bigementia
conigago
diluvigena
maheledo
cisoritoga
supelax
miracetta
dicimatica
ficedicella
peropentia
cibaritas
selibicella
foricicula
desupitia
turifessa
dicanimonas
monopax
haricedo
bipinax
tenemastra
manomitoga
legifilenta
pocilosa
senacimonia
viburicula
didacentia
rurigigena
nutabisca
locupentia
venucitoga
turicentia
filifitica
vinacigena
hecatilenta
femelax
cerimilenta
labecicula
buxifilega
biveritio
demagisca
bacififorma
tegumimonia
pocililega
lapilugo
milipedo
cobalicella
duponosa
ducilifica
calipisca
feditibra
benivitura
bonifivita
giganentia
famelatica
mutabitrix
cerifugo
dilacatica
dimacitoga
levidigena
lenimitas
taraximonas
lavabosa
cibaressa
refunicula
vaciletta
homunitas
bifaritas
halucivita
bicinimonas
deparatio
capabitudo
casigastra
capudax
conigosa
coticetta
sanabosa
metucitoga
penicitrix
hexapetta
lucifedo
defesicella
ducilitio
cuferousia
desacetta
defenimonia
semidibula
genufilega
domigentia
saxifago
denecastra
maxumugo
bovicibula
conarilenta
nubigitas
satacago
relapitura
tegumibula
nugacigena
pedepedo
retecifica
catocitura
gasomitica
culigitas
morigatica
detumilenta
fefelitura
reduvitia
manufisca
facunifica
nubigivita
cerevibula
robigitrix
catagastra
manibimonia
rubefitas
cohonax
novilatio
feditivita
nicomugo
buxanentia
remededo
viburilega
pinigastra
celumitio
vitigitudo
cibarentia
resuletta
cosiditio
horomitas
homulentia
munificula
fuligisca
locupessa
depelosa
bifisitica
notacitica
fefelatio
curacatica
catilitudo
hexagibula
papavetta
butubibula
regigentia
peropilenta
demogastra
rurigastra
benevitoga
siligedo
liceniforma
munifilega
nutabimonia
bisacifica
colubivita
bulapousia
fumacicula
ludibibula
cicilitio
molecimonas
colimimonia
vanitax
defaredo
leviditrix
hirunitrix
vatilax
defosibula
cobalitudo
viburibra
conariforma
menapedo
hirunitica
conubitudo
delapastra
dicabitrix
buceledo
mirififica
vinolatica
vitupitudo
papilousia
vitifigena
rarefifica
denomousia
capilentia
ciminibula
disidisca
cicarax
derecimonas
metapilega
furibifica
cohoriforma
defalugo
recogitura
petulitio
delacibula
monumitica
munimatio
manomicella
venabibra
tomogimonas
lanigitudo
cilotessa
canacitura
monacugo
bicodetta
nutamicella
solifatica
malagedo
democatica
bigemitrix
dimadimonas
senacitia
velivimonia
penicivita
bicubicella
locelivita
xeropicula
cohonimonas
dicanitrix
sanabedo
faticessa
luticimonas
hexapicula
rurigibula
xenopastra
revecivita
viburimonas
denicimonas
colimifica
bipatimonas
dilacessa
vivifitas
timefitia
desepitia
revecitia
fefelax
denorosa
peracitura
cilicago
feficitoga
panopicula
decamastra
luxuritica
vinacitia
melopatio
vilipax
recocedo
detesilega
xeramicella
medimiforma
tabifitia
gasifilenta
telegosa
virecitrix
baropentia
homiligena
levidiforma
dilogetta
benevatio
tubicitia
lupanigena
selibimonia
dimidifica
masocisca
saburastra
macilicula
minagugo
xeropetta
diluditura
catecosa
ridibago
vilitimonia
refulitica
salubax
butubimonas
perexitudo
cacopiforma
biveratio
parocitas
monopimonas
capucitas
capililenta
peracax
colutilega
saburitio
citocisca
cenotitudo
pimenetta
sacopessa
depopitas
horomastra
cepulax
lucerentia
nefaressa
siticatica
menapatica
metabitia
detorisca
nefaritio
celumilega
rutabitica
decitimonia
xenodousia
rorulitas
cisorosa
ridibivita
bicoditas
megalitudo
divolousia
carucousia
gabinitas
depubedo
biparitia
sanabibra
laculitica
metabentia
voragitio
demogiforma
mimogugo
peradilenta
vivifatio
rudecedo
celametta
sanabitica
monopatio
bulapitudo
categago
carunilega
nitelilega
semipibula
viginimonas
benificula
sonipatio
resalitas
modifisca
lenimugo
tubicedo
masocibra
forinicula
malagifica
cisalessa
faticatica
fetifitio
cinefimonia
biveritica
cohuredo
maxumitas
murelitia
funebetta
solipago
medimax
bipenibra
viburetta
colepetta
musulax
colipetta
solipugo
tubicitoga
navififorma
rarefitura
vepalatica
defetisca
desonitudo
vitabitas
laxititudo
remedivita
cucuretta
depasax
volunitrix
latibatica
refacicella
rubecitoga
desupatica
funivisca
fetifigena
bimotimonia
gabinigena
peridilega
tenilicula
ceromosa
videlitica
monimimonas
buxifax
sifuniforma
relecitura
dimacifica
funebax
mimogastra
canacitudo
cerebigena
vitabax
feficitura
subadax
xenodimonas
vavasedo
subinilega
vocifitudo
demagousia
visibentia
rubigigena
boviciforma
docibimonia
denecatio
lametugo
colopivita
funebicella
denunivita
repurentia
hexamitura
funivibra
nutabitio
murelax
domicitoga
bicorastra
loripessa
verecicula
bicubimonia
bicapastra
dibapessa
lupanentia
defenimonas
catocilenta
casigicella
ludimilega
ranuniforma
deforastra
carecatio
dehisibra
selibousia
lupanilenta
navicimonia
nicomicella
sonivatica
lanigatio
holisosa
fiducitoga
fuligatica
coluticula
papavisca
hibisitura
sonivivita
turifugo
colutitudo
sonabitoga
notacitia
pinacetta
funiventia
detumivita
cepuritrix
tabitugo
cosidigena
sitelicula
bicalitrix
lacinosa
bicubilega
veridugo
codifedo
mavorisca
bicubitudo
minagitudo
menapilenta
semodimonas
peripitica
cululimonia
conopibra
saxopentia
pavimetta
ciminilenta
redunago
capuditia
lapicicella
defasax
cerimitas
catabicella
nimirilega
colepilenta
tomogitia
rumifastra
resurentia
depicatica
sotuliforma
serotedo
daducisca
hegumimonia
conubitas
vavasifica
luculisca
favonimonas
hecativita
conubibula
musulatio
detorigena
vavasousia
peridugo
delapigena
detositas
cenotax
papilivita
decenivita
dilecitas
metabitoga
locelitica
herinivita
doxolitrix
bicalicula
derelifica
derecilega
defanedo
conifatica
haricimonia
benemibra
socagiforma
melilitudo
conubessa
panifilega
benemedo
decamiforma
vanititas
recomiforma
caravisca
decamifica
notabetta
nutabedo
regifivita
diluvitura
corocosa
divulivita
ceromitas
subadimonia
perabitio
curabosa
bovicilenta
modifitrix
demadousia
solacimonia
laculatica
cuferitia
depelitoga
categousia
caselimonia
peropugo
homogax
haricatio
perexivita
cibicago
gemebiforma
negidimonia
herinitoga
famelitrix
cicatitica
virecitio
metabisca
turibimonia
purulax
rubicicula
telegatio
futatimonas
dinupicella
palifibula
diminatio
metapicella
desacitrix
nimirimonas
redunitas
rudecitas
laxititrix
sonivitoga
visibitia
mirabitia
salubicella
vacilibra
caselatio
volucigena
resupisca
deniximonas
subabicella
musulitia
catilatica
domipatio
lanugilega
cululigena
documetta
revulimonas
cobalilega
desuritudo
sanabigena
dedigibra
ficulatica
depicimonia
culibetta
nubifimonia
dicabago
secunimonas
cituvigena
mutabousia
refinax
pavimitas
murilosa
lanigilenta
conipitoga
rorulitrix
carucitrix
pulegatio
fetifibra
visibastra
conopisca
butubitia
luculitica
notacax
facunimonas
biverosa
defarax
depecitia
vigenentia
recoricula
momorousia
peridimonas
lubenitudo
halucibra
delapitas
derelitura
pecunugo
robigilenta
relenosa
podagisca
cerevitrix
turicimonia
seposatio
defacago
nubigicella
bulapigena
diluvessa
defesitio
colopigena
divoliforma
cicarosa
fuligibula
decomibula
noviletta
solipitia
cenodessa
ducilentia
repecilenta
famelicula
melilentia
semunousia
vaciligena
denorivita
cuferitura
deculibra
colipatica
palifitio
docibitio
pulegatica
dedigetta
bicoribula
bicalosa
desurisca
retecimonas
selibisca
retuniforma
lanifatica
modifimonia
tibicitoga
denunitio
diritax
hexamosa
lubenigena
nubecibra
curacitoga
refunifica
cerevax
domicifica
genufitoga
dehonitoga
maledastra
bicoditura
deteposa
cilicimonia
decinimonia
regifitica
conopilenta
vivifivita
manomifica
buxifitica
benepedo
vecorimonas
detunousia
malogastra
lapilatica
monocatio
hexapousia
conabitas
bifarilega
vaniditia
semifilega
sitelousia
dececitica
valefitas
capabimonia
homunosa
funebibula
tibiciforma
cucuratica
nubifitas
fusifosa
hemidugo
culilitura
siticosa
defunigena
supelisca
nocenivita
desonibra
cimelitudo
hemidivita
susicetta
pecunibra
desorilega
bigemitura
desulitudo
rubefisca
decucifica
cosigentia
semipitoga
catafitoga
manupastra
defunibula
cerucosa
regifitoga
bovicicella
desupitudo
faticugo
revulibra
nehalatica
repagimonia
vinolicella
detepitoga
hexagicella
bimetibra
turilessa
susicisca
celumilenta
detepibula
vavasitica
vigenimonas
rumifedo
horomimonia
subucatica
lavabitrix
lenunitura
bisacedo
subinitudo
patibimonia
delebastra
bonifigena
dimidatica
metucatio
televatio
delecimonas
denomiforma
venabitica
defuligena
desonugo
detotitoga
decamisca
pimenibula
decitago
fumacigena
sicubax
tomaciforma
rudicitrix
loraritrix
filifilega
rubigitrix
curacosa
maciledo
documax
foricifica
nubecicula
benepivita
subucitas
pimenicula
catobitoga
locelilenta
mimogessa
vicatax
curotitia
homilatica
derecitio
decamilenta
sarabax
xenodicula
dapifetta
relenibra
nicomitica
masocastra
hemititia
capudosa
democitica
habacitura
catafitas
megalimonas
volubosa
musulentia
homolicella
desucitoga
dicabosa
senipitica
hexamitas
fetifitudo
perexitrix
sotulitudo
celamigena
foricitica
hexagitura
pudibetta
defacimonas
voragisca
bugilosa
calipitudo
defarilenta
detumilega
nubecigena
vatililenta
derecicella
demulastra
cinefessa
cocibisca
lanigentia
homagisca
rudecicula
pecunago
fatifitudo
rosacax
mirabastra
milipessa
coturitudo
bicodifica
pulegitura
siminago
bonifatio
nocumicula
visocitio
sugilessa
homagatica
podagedo
dedigatica
penuriforma
senacilega
dilibitura
deforatica
categentia
colutousia
bicubedo
rubicessa
cenacitas
biveritudo
penecessa
bipenicula
cuticitudo
catecitica
recocousia
refiniforma
cibarigena
diluvetta
desepisca
buxifosa
petulosa
lucubisca
fuligetta
nubifibula
bifisago
recucatio
bacifitas
cepulisca
fatilatica
dicimitica
ludibitio
sitelitura
cobalitoga
cilotago
bipatisca
munificella
mavorosa
cocibigena
pinacitoga
luculosa
detesilenta
divoretta
manupilega
colubitudo
letifugo
cerifilega
tetenimonia
tigurilega
masocibula
cocolosa
bulapilenta
catabibra
bigemessa
coturilega
repepitoga
murilastra
cepulibra
direcedo
metapiforma
monimatica
decinibra
deparitudo
detenitia
devecitoga
bonitugo
resulentia
vanitisca
hegumitudo
cetaricella
maligilega
domabibula
regifosa
minurax
telegitia
homunitrix
hexamitia
risibisca
bipalax
lapilax
tirocimonia
labecitio
nugacastra
dehinilega
relapimonas
retecentia
perabitas
dimiditica
feditifica
carunatio
vanidicula
fetulatio
vinolilenta
conifitica
decupago
susicicula
semibibra
bimotimonas
dehonilega
ratifimonas
bonitibula
subabicula
fefelicella
herinicula
navicilega
turiligena
culilax
denupisca
cacomilega
vitabitio
semilicula
fusifitoga
remedatica
dilogedo
viragivita
resurugo
semimitoga
diludicella
lanifisca
roruletta
suboditudo
lapicastra
subinimonia
tabitentia
cimelitrix
mimogicula
culigiforma
mirificella
bulapessa
cibarivita
vanidifica
halucetta
saburitura
bicinifica
volunimonia
detesimonia
curacimonia
colepicula
cohuritia
coturivita
labecedo
secunastra
rorifugo
revecitudo
volubibra
lenunitas
denecitrix
timefitica
novilitica
cocolessa
semapisca
subucugo
demadicella
minuritrix
herinibula
citocastra
defacifica
fiducedo
cerimicella
bovicitas
nefanugo
depicitia
funamessa
desulatio
sacopimonas
holisibra
diponugo
fatilitica
codifugo
citivitia
panopivita
siligiforma
hexapedo
delecago
sifunosa
semiliforma
volunifica
manupimonia
canacessa
cilibivita
xenodivita
benivilega
vocamigena
favonitoga
parocibra
domabosa
turicitas
delecatio
maxilitudo
buxanicula
tabifitica
detorifica
fumacitudo
xeramicula
hemidatio
novilitoga
divulitia
culigosa
vecorisca
terebatica
pacififorma
casigitio
vitupugo
relecitoga
sonipimonia
mavorugo
venucatio
coninastra
derunibula
reforessa
peropatio
notacimonia
defenedo
cepulugo
turicax
defenilega
cemenicella
depicigena
lavacitio
favilatica
subinastra
foricicella
derecosa
decacentia
manibifica
furibitas
rubefentia
futatitas
subodetta
curotimonas
luculilenta
denecibula
fatifitoga
bucelivita
bicipisca
malifibra
nocumetta
conipentia
colimedo
cucuritica
cepurastra
morigisca
turicitura
rorifatio
velivatica
miracatio
volunago
milipiforma
delucilega
siligugo
hexamigena
capuditio
viripetta
decatisca
humecicula
nucifosa
decomedo
benemitio
decenax
rinocetta
bifisiforma
sarabatica
dilogitudo
carucicella
cotenilenta
cerevitica
solacosa
hexagastra
catafisca
divoricella
camilicella
denixatica
dicabitia
catalugo
verecitudo
semapax
genocitio
capudibra
decacifica
lanigilega
taraxentia
nocenastra
cocibivita
valefivita
repecastra
semibago
demagitio
doxolax
ranunifica
volucedo
defanatio
letifitoga
papavitoga
lavacessa
siticitas
lenocatio
lugubimonas
benivitas
tametousia
locupigena
democivita
depupitura
locupetta
paropitica
cicilitrix
coleposa
galacitura
hirudax
dilacastra
rorulibula
peropimonas
cucuriforma
niteledo
favonatica
funebilega
cicaritas
vitupilega
denecitas
manupibula
tabitilega
diluvibra
hirunatica
colopedo
lanififorma
semidago
nimiritica
vilipetta
nicotigena
diluvibula
meridilega
sanabentia
cocolibula
secunax
denorilega
locelatio
resupitio
defositura
minuredo
catafitia
senipax
domabitudo
defaratica
lucifisca
dilibimonas
hecatetta
nefarentia
resupessa
luceritas
xeropugo
semiventia
feculax
cacalilega
vitigax
favilibula
tegimivita
benifessa
turififica
virecilenta
loripitio
benevitas
demulitrix
murelitrix
sacopicula
conibax
monogitudo
tolutilega
repurilega
delebedo
metapibula
homulicella
furibivita
vanidiforma
lanugessa
lubenivita
cacomatio
redaciforma
retunago
rubicitura
desomivita
desuredo
nehaledo
daducivita
selecivita
lutulicula
senacitica
pabilicula
cerimitio
cululatica
derelatio
videlitrix
denigitica
cerucifica
cenacatica
fatifousia
xenoditio
rorarigena
dicibessa
renavitrix
derelentia
sonivitura
lubenimonia
subinitia
viripax
tenebitura
modifimonas
turifosa
semapitrix
cetarousia
herinago
lenocastra
laxiticella
lupanimonia
detoticula
domigatica
domipisca
murelilega
lugubimonia
lubeniforma
feditilenta
lugubessa
codifibra
horomitura
recorilenta
rurigiforma
betacago
decinousia
docibago
semifimonia
colopago
dececimonia
sifunilenta
pulegago
tubicatio
fetulivita
metucibula
verificula
vatilitas
paracago
taraximonia
turifitrix
cacalitas
cerucilenta
bicorivita
detenilega
desaciforma
resacastra
derecitura
lucubatica
hexagigena
coninicula
fetifentia
democedo
detunitio
metapago
viragisca
semilatica
vitifatio
capilitrix
resacitudo
metabitas
conabatio
laculitoga
peracitia
dicibugo
sugilibra
bipenatio
pulegitio
monimiforma
bacifimonia
gerunivita
denomax
derunatio
tigurifica
corocousia
seposiforma
sonivousia
bicoditrix
disidicula
favonitio
visibifica
desepetta
tameticula
licenicella
cilibisca
duriciforma
vepalosa
bicalitas
ficulentia
catalicella
celumicula
petulilega
cicatitrix
luceriforma
decamago
cacalitura
giganastra
xeropiforma
decitedo
desuritura
buxanitio
nocumilega
vitificula
peropitura
ceromessa
remedimonas
virecimonia
bucolastra
mahelitia
malifastra
direcitura
deparousia
conabimonas
pericatica
tabifentia
curabatio
casigax
cepurosa
refulicula
cohonitas
celumedo
bulapitura
peripimonia
musulastra
semimitrix
semilitio
tirunisca
capilisca
valefisca
demadentia
codifitica
galacifica
tirunitio
loripentia
futatisca
depopivita
menapax
homogimonia
navicitrix
reduvimonia
sicinago
vacilosa
dibucitia
nefanitura
visifousia
venucilega
semunitura
vecorastra
rubigifica
fameliforma
lanifax
masocedo
paropivita
decenitia
benifitrix
nutamugo
peraditio
venunicella
colapibra
sicunigena
manupentia
desomedo
bicoressa
deteciforma
repecatio
fibicousia
lucubimonas
peridetta
rosacugo
catafitura
vitifousia
cacalax
fecunicella
rubefitrix
ficuligena
vinolitio
colipitrix
lenociforma
siminilega
nubifibra
maledessa
defalifica
capucetta
vivifessa
tomogivita
conaritoga
caselentia
rarefitas
venefimonia
homilicula
ranunago
detepatio
divulicula
fefeledo
revecifica
detotastra
furibastra
citipivita
nubigedo
coninisca
dinupastra
loripifica
ratifibula
panopitio
[truncated: 46,530 more rows]

## Sheet: 650 ar gen names applied
EX4484-52	Bifararcha
PWEA01	Nutamarcha
SpSt-1190	Funivarcha
QMZS01	Genufarcha
Bog-38	Cerifarcha
E2	Visibarcha
EX4484-6	Denixarcha
EX4484-205	Bovicarcha
JABDBI01	Dicanarcha
B88-G9	Semigarcha
UBA186	Bulaparcha
DTBI01	Rarefarcha
B47-G6	Cerararcha
QMWL01	Rubecarcha
SW-10-69-26	Vitabarcha
CG10238-14	Biverarcha
DTNL01	Nivomarcha
DHVEG-1	Pedifarcha
UBA8480	Colubarcha
SCGC-AAA011-G17	Lanifarcha
0-14-0-20-30-16	Tumefarcha
B26-1	Remularcha
UBA10214	Volubarcha
40CM-2-53-6	Nimirarcha
LC-2	Saxifarcha
UBA10117	Pinigarcha
RBG-16-68-12	Desorarcha
ARK-15	Hirunarcha
QMZP01	Detorarcha
IMC4	Baditarcha
DTDM01	Pinifarcha
CR-4	Lametarcha
ANME-1	Loriparcha
B29-G17	Coninarcha
GW2011-AR5	Pericarcha
CG07-land	Pomifarcha
B25	Diponarcha
UBA202	Cimitarcha
QMSL01	Tametarcha
PWKY01	Lanigarcha
JdFR-21	Divorarcha
DTBS01	Ludibarcha
B24	Refularcha
B87-G9	Manibarcha
SG8-5	Seniparcha
UBA10834	Cilotarcha
CAILAH01	Sacomarcha
UBA583	Filifarcha
TCS64	Tegumarcha
B1Sed10-29	Deforarcha
JABLTI01	Vepalarcha
UBA460	Hemidarcha
CABMEP01	Coniparcha
CSSed11-243R1	Cuferarcha
UBA287	Depelarcha
B31-G17	Ceracarcha
UBA184	Dimidarcha
EX4484-135	Tabifarcha
B47-G6B	Demularcha
UBA9212	Murelarcha
JAADDC01	Capilarcha
PEZQ01	Panifarcha
LC-3	Galacarcha
B9-G16	Lacinarcha
EX4484-217-1	Bicaparcha
B33-G15	Viragarcha
DTKX01	Conabarcha
JACIWG01	Nicomarcha
RBG-16-48-13	Lucularcha
CABMDC01	Duponarcha
DRAE01	Favonarcha
UBA12382	Vehicarcha
UBA73	Decenarcha
GW2011-AR1	Deseparcha
UBA93	Tenilarcha
UBA57	Panoparcha
EX4484-36	Sugilarcha
GW2011-AR4	Dehonarcha
GW2011-AR17	Ratifarcha
CSSED10-239	Coleparcha
ARS1285	Corocarcha
HR1	Buxanarcha
UBA233	Nugacarcha
CG1-02-33-12	Fecularcha
CAIVOO01	Timefarcha
WYZ-LMO8	Caravarcha
UBA12030	Pulegarcha
NZ13-MGT	Milifarcha
UBA9642	Citivarcha
CG-Epi1	Volucarcha
CG1-02-31-27	Soliparcha
NBVN01	Redunarcha
UBA9989	Cerevarcha
UBA10216	Cicatarcha
HR02	Verecarcha
AG1	Purularcha
EX4572-44	Disidarcha
UBA12501	Cocibarcha
UBA183	Tenebarcha
UBA8471	Figilarcha
CAINOH01	Notacarcha
CG1-02-47-18	Sicararcha
PFCU01	Citocarcha
GW2011-AR9	Tirocarcha
QMZT01	Nitelarcha
QMZM01	Nugivarcha
UBA213	Dilemarcha
SOKP01	Hirudarcha
JDFR-13	Munimarcha
JAAEEP01	Ficedarcha
QS-9-68-17	Rumifarcha
DTDX01	Cenodarcha
GW2011-AR18	Velifarcha
UBA489	Bipatarcha
21-14-0-10-32-9	Colimarcha
BA1	Hemitarcha
GW2011-AR15	Cohonarcha
UBA97	Latibarcha
CG08-08-20-14	Cilicarcha
UBA11716	Bonitarcha
JdFR-43	Pimenarcha
JAAOZP01	Masocarcha
B14-G2	Cacomarcha
SZUA-236	Fefelarcha
SW-7-71-33	Molecarcha
B10-G16	Modifarcha
BMS3B	Baroparcha
UBA472	Satacarcha
SKSH01	Cacoparcha
DTCF01	Recorarcha
JdFR-42	Vitifarcha
GCA-001856825	Decuparcha
CG1-02-47-40	Relaparcha
SKIA01	Solivarcha
B24-2	Fumifarcha
UBA10161	Siligarcha
DRYS01	Cerimarcha
CG1-02-57-44	Peroparcha
B9-G17	Pocilarcha
B15-G2	Domicarcha
UBA10191	Caliparcha
DTKF01	Peradarcha
UBA148	Subucarcha
DSZF01	Duricarcha
B20-G17	Holisarcha
GW2011-AR10	Siminarcha
JAADEF01	Papilarcha
GCA-2687185	Nubecarcha
JdFR-45	Salubarcha
JAAXVZ01	Bicodarcha
UBA525	Fibicarcha
DTMW01	Tolutarcha
DTQO01	Volunarcha
WOR-SM1-SCG	Citiparcha
ARS49	Terebarcha
GCA-2686295	Vitigarcha
ARS1403	Mimogarcha
B66-G16	Depubarcha
ANME-2c	Conifarcha
QMVU01	Lugubarcha
JAAZKV01	Ficularcha
ARS1160	Navicarcha
SCSR01	Cucurarcha
JAADFI01	Culularcha
GCA-2687795	Depecarcha
UBA164	Malagarcha
JAADFO01	Tomogarcha
ARS1178	Defacarcha
B79-G9	Vinacarcha
UBA284	Dilibarcha
DTJL01	Saxoparcha
CAITNU01	Coticarcha
DSVV01	Regifarcha
QMZZ01	Furibarcha
ARS21	Relecarcha
RBG-13-38-9	Rurigarcha
GCA-2688035	Hexamarcha
HEL-GB-A	Democarcha
JABXJV01	Defenarcha
DTNV01	Metabarcha
JACAEJ01	Detumarcha
CABMDW01	Telegarcha
DSZJ01	Mahelarcha
UBA10107	Paralarcha
SCGC-AAA252-I15	Catobarcha
DSCA01	Diritarcha
GCA-2687815	Cepularcha
DTGH01	Xenoparcha
SM23-78	Desacarcha
B15-G16	Taraxarcha
B40-G2	Lucelarcha
JABMPP01	Viriparcha
SpSt-1120	Culigarcha
PWGL01	Cibicarcha
J110	Saburarcha
B24-G1	Defosarcha
EX4484-224	Cemenarcha
47-G6	Gemebarcha
DTGE01	Delacarcha
UBA168	Vagabarcha
B72-G16	Rubigarcha
JAAOZN01	Fatifarcha
B29-G15	Licenarcha
SBBD01	Subofarcha
QS-1-68-20	Sifunarcha
SKGA01	Betacarcha
B39-G2	Demagarcha
UBA10200	Tubicarcha
GCA-2688965	Forinarcha
NM3	Mavorarcha
GLR71	Venabarcha
B47-G15	Semiparcha
WUQV01	Denunarcha
B3-JM-08	Refinarcha
UBA11576	Decularcha
J091	Decucarcha
B50-G16	Domiparcha
GW2011-AR20	Tabitarcha
DTIR01	Momorarcha
UBA10219	Voragarcha
PZKD01	Tetenarcha
DRUP01	Colaparcha
WYZ-LMO6	Peracarcha
HEL-GB-B	Ludimarcha
UBA141	Cisalarcha
UBA543	Defularcha
0-14-0-20-34-12	Decomarcha
J096	Bimetarcha
GCA-2688095	Notabarcha
PNOQ01	Cepurarcha
CADDZS01	Resalarcha
SP79	Vocamarcha
B8-G13	Lucubarcha
SKNY01	Letifarcha
SOJC01	Cituvarcha
B48-G16	Pacifarcha
JAADFM01	Devecarcha
UBA10210	Relenarcha
JACIVX01	Melilarcha
DTFW01	Bugilarcha
JAAOZO01	Dececarcha
PXRE01	Morigarcha
PXDW01	Cadurarcha
EX4484-15	Venefarcha
SOIM01	Vocifarcha
LCB-4	Deteparcha
AMARA-1	Viginarcha
MFWN01	Locelarcha
UBA119	Foricarcha
PEVX01	Catagarcha
B54-G15	Reforarcha
J072	Venunarcha
B69-G16	Benifarcha
LFW-46	Necubarcha
GCA-002838935	Dilacarcha
EX4484-31	Refocarcha
GCA-2685855	Rosararcha
FEN-987	Conararcha
BM511	Cadavarcha
DTGL01	Fecunarcha
B18-G2	Monoparcha
1-14-0-10-31-34	Ranunarcha
PFDC01	Denigarcha
0-14-0-80-44-23	Negotarcha
RDOG01	Carunarcha
DRVD01	Laxitarcha
UBA509	Virecarcha
RumEn-M2	Bisularcha
VadinCA11	Doxolarcha
MGIIb-N1	Lucifarcha
UBA412	Novilarcha
MGIIb-O1	Giganarcha
DTU008	Derelarcha
MGIIb-O3	Vivifarcha
MGIIb-O5	Televarcha
CAIKOD01	Lorararcha
VYCS01	Ridibarcha
MGIIb-O2	Fetifarcha
CAIYHQ01	Cohurarcha
CG1-02-35-32	Nehalarcha
UBA447	Vehemarcha
SCGC-AAA471-B05	Totidarcha
MGIIa-L2	Selecarcha
MGIIa-K2	Malivarcha
CAISET01	Desucarcha
SM1-50	Rubefarcha
ECH-B-1	Regigarcha
UBA10452	Hecatarcha
MGIIa-L1	Curacarcha
MGIIb-P	Penicarcha
GW2011-AR11	Homolarcha
UBA71	Defesarcha
CAIPOI01	Pepenarcha
UBA95	Nicotarcha
UBA7939	Reduvarcha
PALSA-986	Nocumarcha
JACEMX01	Cenotarcha
CAIKOA01	Curabarcha
MGIIa-L3	Celumarcha
UBA581	Lenocarcha
MGIIa-I	Semivarcha
NZ13-MG1	Demadarcha
GW2011-AR13	Decatarcha
GCA-000496135	Miracarcha
UBA60	Xeramarcha
PXYB01	Homogarcha
Fen-7	Risibarcha
MGIIb-Q1	Dilogarcha
BE-D	Tigurarcha
MGIIb-N2	Conoparcha
DTCV01	Defetarcha
CBA1134	Capabarcha
GCA-2728275	Refacarcha
UBA492	Selibarcha
WYZ-LMO2	Herinarcha
AWOC01	Cilibarcha
PWHV01	Vanidarcha
CAIPHS01	Fusifarcha
UBA8886	Visifarcha
MGIIa-K1	Musularcha
CG1-02-39-14	Periparcha
TA-21	Cerebarcha
CS3-C152	Dimacarcha
WYZ-LMO11	Tirunarcha
DRVV01	Manomarcha
RBG-13-33-26	Cotenarcha
B109-G9	Megalarcha
UBA588	Vilitarcha
PL-Br10-E2g29	Lanugarcha
Acd1	Monodarcha
B17-G15	Homularcha
QMZJ01	Defunarcha
DTEX01	Conigarcha
QENH01	Homicarcha
PWWA01	Divolarcha
BA2	Pedeparcha
UBA11855	Catecarcha
CAIKBN01	Bicorarcha
JdFR-07	Bicalarcha
UBA285	Solifarcha
DSZV01	Revecarcha
WYEQ01	Denomarcha
B78-G9	Binocarcha
WYZ-LMO10	Ruricarcha
MVQI01	Decitarcha
DRZQ01	Depasarcha
B12-G16	Demogarcha
JGI-OTU-1	Repeparcha
WYEN01	Vinularcha
ARK-14	Homagarcha
N1521	Malifarcha
CAIOIN01	Ducilarcha
UBA92	Pavicarcha
B1-Br10-U2g19	Detesarcha
BMS3ABIN17	Minagarcha
PSPM01	Paracarcha
QMZY01	Luticarcha
DSLF01	Fuligarcha
JdFR-11	Nefanarcha
BA-19	Perabarcha
CAIRCU01	Catafarcha
DSZD01	Catocarcha
JACAFH01	Habacarcha
Tc-Br11-E2g8	Solacarcha
WTHC01	Direparcha
CAIVED01	Hexaparcha
DTBP01	Vigenarcha
UBA328	Dehisarcha
SOJZ01	Xeroparcha
UBA9949	Vatilarcha
DRVP01	Resacarcha
TA-20	Derecarcha
Tc-Br11-E2g1	Carecarcha
SKXI01	Bigemarcha
EX4484-218	Velivarcha
PWHR01	Lavacarcha
UBA12276	Direcarcha
Tc-Br11	Labecarcha
DTBJ01	Hegumarcha
UBA147	Sanabarcha
DG-33	Ciminarcha
SKVC01	Dibucarcha
MX-02	Nosocarcha
JGI-0000106-J15	Catilarcha
BOG-1369	Repagarcha
QMZG01	Horomarcha
B3-G16	Lupanarcha
UBA207	Ciniparcha
DTBU01	Pecunarcha
CAILMQ01	Rosacarcha
PIYA01	Cibararcha
UBA117	Pabilarcha
ANME1a	Forabarcha
PSPT01	Delubarcha
B65-G9	Semibarcha
B14-G17	Gerunarcha
JABDRC01	Remedarcha
JACIWB01	Ludifarcha
PFCY01	Defalarcha
GCA-2686855	Casabarcha
UBA226	Sitelarcha
UBA153	Sicunarcha
B75-G9	Cocolarcha
VBQI01	Dedigarcha
SOJA01	Favilarcha
EX4484-71	Lubenarcha
UBA288	Nucifarcha
DRUK01	Manufarcha
WOR-SM1-SCG-A	Legifarcha
PWVO01	Delecarcha
J144	Divularcha
J152	Cosidarcha
OWC5	Domabarcha
EX4484-2	Peridarcha
SG8-32-3	Socagarcha
XQ-INN-246	Benevarcha
UBA203	Sicubarcha
UBA11998	Viburarcha
BA-13	Bisacarcha
B82-G9	Subodarcha
DTDI01	Rudicarcha
CABMGO01	Dibaparcha
UBA349	Gasomarcha
B23	Decinarcha
SMTZ1-45	Nubigarcha
GCA-2688775	Redacarcha
PL-Br10-U2g16	Resularcha
CABMGU01	Xenodarcha
UBA9653	Lenimarcha
JAADEY01	Manubarcha
SMTZ1-83	Fiducarcha
DSQK01	Conubarcha
SpSt-734	Pavimarcha
SURF-65	Hexagarcha
EA-19	Semifarcha
LKUD01	Benivarcha
HRBIN02	Dupunarcha
JACCLJ01	Benemarcha
CAIXYX01	Mutabarcha
B-DKE	Maledarcha
TH5896	Facunarcha
DTNT01	Vicecarcha
SICU01	Feficarcha
GLR112	Lacularcha
GCA-2726865	Detotarcha
CABMGC01	Rorularcha
HRBIN01	Lapicarcha
UBA10205	Minurarcha
B17-G17	Recucarcha
WRER01	Desomarcha
QS-4-69-31	Bonifarcha
CSSED10-269	Cimelarcha
DTQF01	Maligarcha
JAAZWY01	Homunarcha
DTMT01	Bimotarcha
WRKA01	Mirifarcha
A07HB70	Nubifarcha
EX4484-204	Humecarcha
1-14-0-10-37-12	Hibisarcha
B44-G15	Domigarcha
JACAEI01	Dicibarcha
QMWT01	Rudecarcha
SDNM01	Lavabarcha
QNYQ01	Semaparcha
BIN-L-1	Gasifarcha
CABZYC01	Nocenarcha
JdFR-19	Decamarcha
SD8	Denicarcha
JdFR-22	Tenemarcha
UBA431	Maxilarcha
DTJS01	Sarabarcha
CSBR16-182	Serotarcha
B12-G17	Bicinarcha
DSAL01	Capudarcha
JAADER01	Parocarcha
FEN-33	Mirabarcha
EX4572-165	Videlarcha
MGIIa-L4	Subadarcha
PIYN01	Lucerarcha
TEKIR-8	Bipinarcha
EX4484-58	Casigarcha
MVRE01	Dilicarcha
UBA9915	Diminarcha
UBA10204	Dicimarcha
Sv326	Telefarcha
DRZC01	Didacarcha
CAIXOA01	Levidarcha
ARS10	Recogarcha
JAAYNL01	Meridarcha
SW-10-68-16	Pinacarcha
M3-22	Monimarcha
JAAEEW01	Futatarcha
JAAXQB01	Defararcha
MP8T-1	Categarcha
QS-4-70-19	Coturarcha
WJOV01	Cetararcha
SURF-58	Patibarcha
EX4484-121	Diluvarcha
PUNK01	Fatilarcha
CABMGE01	Depacarcha
SpSt-9	Cacalarcha
JWKY01	Sonivarcha
QEXZ01	Buxifarcha
COMBO-56-21	Navifarcha
NP1466	Semilarcha
DTOY01	Decaparcha
CSP1-1	Rubicarcha
ANME-1-THS	Papavarcha
DTIP01	Turicarcha
UBA587	Holovarcha
QENJ01	Vanitarcha
DTIH01	Femelarcha
TEKIR-14	Maxumarcha
ARS23	Documarcha
DSQZ01	Subinarcha
QS-5-70-15	Cenacarcha
CAIQQL01	Delaparcha
B1-Br10-U2g21	Tomacarcha
JAADDH01	Butubarcha
QS-1-68-17	Halucarcha
ISO4-G1	Detosarcha
JABABT01	Fetutarcha
RBG-16-49-10	Cicilarcha
JACAEL01	Cicararcha
UBA8516	Catabarcha
QMWW01	Recumarcha
B1-G15	Sacoparcha
CABMCB01	Bifisarcha
CAIYYQ01	Negidarcha
RBG-16-57-9	Veridarcha
DTHR01	Coliparcha
CABMJK01	Senacarcha
B63	Homilarcha
J101	Detenarcha
TH1177	Fidenarcha
DRIF01	Funebarcha
QCWD01	Podagarcha
DRBY01	Taxilarcha
CABMEV01	Bipenarcha
SpSt-742	Capucarcha
JACGMN01	Vicatarcha
DTIM01	Vituparcha
EX4572-64	Semidarcha
DRZP01	Caselarcha
0-14-0-20-59-11	Curotarcha
JAADCV01	Derunarcha
MVRC01	Tegimarcha
JAADIF01	Visocarcha
TH5893	Valefarcha
DSLH01	Cerucarcha
JAADGB01	Lapilarcha
DRGT01	Decacarcha
JAADEL01	Repudarcha
PCYB01	Bucelarcha
CAILMU01	Ceromarcha
UBA467	Renavarcha
MWBV01	Repurarcha
ARS1309	Defanarcha
CAISDH01	Lenunarcha
CADBMS01	Codifarcha
SG8-52-3	Secunarcha
CAIKMX01	Manuparcha
JdFR-37	Cenobarcha
1-14-0-10-45-29	Turibarcha
UBA582	Supelarcha
NZBF01	Nidifarcha
JdFR-41	Coloparcha
CADDZR01	Lutularcha
JABDCJ01	Petularcha
B24-G9	Sotularcha
UBA102	Cohorarcha
WUQU01	Luxurarcha
UBA8941	Conamarcha
DSDF01	Tibicarcha
SpSt-28	Dimadarcha
1-14-0-10-32-24	Susicarcha
G60ANME1	Munifarcha
SG9	Metucarcha
B1SED10-34	Delucarcha
SHMX01	Soniparcha
SKIS01	Funamarcha
UBA493	Desonarcha
GCA-965745	Vacilarcha
PIYF01	Celamarcha
ASMP01	Depocarcha
EA-27	Refunarcha
J104	Delebarcha
UBA204	Rorifarcha
JDFR-14	Bipararcha
CABMCJ01	Mahemarcha
SW-4-43-9	Desuparcha
J156	Sicinarcha
JABLXE01	Vecorarcha
GCA-2688265	Dehinarcha
DRYM01	Conibarcha
JAADCY01	Medimarcha
SICV01	Palifarcha
DSAX01	Famelarcha
TEKIR-12S	Sonabarcha
DSBS01	Vavasarcha
JABWCK01	Bicubarcha
ARS1301	Cobalarcha
JdFR-13	Semunarcha
B3-WOES	Decunarcha
AD8-1	Retecarcha
JAAYZC01	Robigarcha
JABMQF01	Carucarcha
UBA9640	Depuparcha
1-14-0-10-44-13	Menaparcha
SpSt-971	Haricarcha
VBQP01	Levifarcha
QBUR01	Meloparcha
MTP4	Necoparcha
HARCEL1	Metaparcha
M9B1D	Pudibarcha
GCA-002792115	Viliparcha
1-14-0-10-34-76	Cunabarcha
DSFO01	Fumacarcha
CAIMOB01	Camilarcha
UBA206	Detecarcha
GCA-2688355	Denavarcha
ARS50	Recocarcha
CSBR16-154	Debucarcha
DTGI01	Cinefarcha
QH-10-67-22	Subacarcha
CAIYYO01	Turifarcha
B5-G16	Dinuparcha
AAA261-N23	Subabarcha
PWVY01	Depicarcha
J07HR59	Nutabarcha
GCA-2687275	Murilarcha
PIYB01	Beneparcha
SW-9-67-25	Depoparcha
DRYY01	Desurarcha
CS1-C013	Cataparcha
QS-5-68-33	Cuticarcha
WTCK01	Rinocarcha
20-14-0-80-47-9	Monacarcha
UBA114	Monumarcha
JAADDK01	Seposarcha
CAIXRF01	Macilarcha
B91-G9	Denorarcha
B46-G15	Faticarcha
UBA10536	Cerofarcha
GCA-2688925	Biciparcha
JAADFH01	Peribarcha
CABMGN01	Turilarcha
B67-G16	Diludarcha
J060	Resurarcha
JAADFX01	Paroparcha

## Sheet: 1,806 ar sp epithets applied
sp003162175	cohoressa
sp900314695	biparitoga
sp900314635	vitifastra
sp002498845	sonipedo
sp002498385	galacilenta
sp003139855	visifax
sp002499445	depupugo
sp002494495	curacousia
sp001421175	laculatio
sp002508705	cinipitia
sp001481295	refocugo
sp002498365	furibax
sp010028495	siticimonia
sp002499585	semivicula
sp002495685	funivitio
sp002502175	direpilega
sp900314605	rurigitas
sp002504525	navicilenta
sp001628485	defenimonia
sp013390905	licenilega
sp002789635	cenobilega
sp903871465	decacimonas
sp002498925	remedilega
sp903819595	resupetta
sp009840065	lugubax
sp002501885	delecedo
sp900320515	detenousia
sp002494975	monocilenta
sp002686525	reforousia
sp002737455	rumifitura
sp002714305	reduvimonas
sp002501845	relecibra
sp002503845	loraribra
sp900317865	viripentia
sp903926075	munifousia
sp002792635	laculiforma
sp902784195	xeropilenta
sp001602645	totiditas
sp002503205	munimibra
sp000380705	cimeliforma
sp001629235	vitabifica
sp002698145	cucuritoga
sp002762735	pinifetta
sp002714745	locupago
sp000979455	refacicula
sp001719125	depopigena
sp002719395	monogetta
sp001629255	pabilousia
sp903884505	cocibilega
sp002496355	semifitrix
sp002506105	relenicella
sp002501605	saxifilenta
sp002792915	revecatio
sp003019535	repepitas
sp011523055	funivitoga
sp002501855	ratifitura
sp002729095	luxurilenta
sp002504905	lugubatio
sp002498455	derecivita
sp002494565	corocitoga
sp002254765	defasilega
sp002505345	favonitoga
sp12027u	detumentia
sp002505695	diludiforma
sp002499525	vehicimonas
sp002502095	depecatica
sp002502245	corocimonas
sp002506425	depetilega
sp902763935	repuritrix
sp002730095	cocolimonas
sp002501805	mutabitudo
sp002504845	mirifisca
sp002725315	pinacugo
sp001627235	denixifica
sp002496805	timefedo
sp10136u	terebedo
sp002507545	bipinivita
sp002499195	vilitedo
sp002718995	depasilenta
sp002505455	mahelitudo
sp903866625	recumago
sp002499405	cocolicella
sp900319535	derunitudo
sp014237145	resacetta
sp002252755	bicorimonas
sp002505775	baditifica
sp002503055	vicatibra
sp903901015	peripitoga
sp003158115	vicecitia
sp000495735	hexamisca
sp013867335	viripilega
sp001917995	sicinibra
sp903828955	mirifitio
sp11892u	nugacitio
sp11921u	dapifetta
sp005798405	desulentia
sp002762865	cosigastra
sp002498725	repagitoga
sp903907555	curotax
sp002494625	paracentia
sp013538805	valefibra
sp903832665	medimilenta
sp004347965	dereciforma
sp002501775	fetutastra
sp002926195	mahemigena
sp000484935	momorago
sp002498525	culigago
sp002720095	giganigena
sp002497895	feculilega
sp10106u	telegicella
sp002499345	catalibula
sp011363045	cenoticula
sp002495905	revuligena
sp002722135	sonipicula
sp002687935	maxilitica
sp011773785	recogitura
sp003166335	conubimonas
sp9966u	lametifica
sp9596u	xeropitura
sp8684u	notabatica
sp002722615	deluciforma
sp12459u	fibicibra
sp002502215	mirabicella
sp000496135	vitigessa
sp8160u	delebibra
sp002503395	tubicifica
sp002497025	notacax
sp002077075	venefentia
sp001587595	rudicivita
sp001437625	homogigena
sp002722735	rorulitudo
sp002487355	detunedo
sp003352285	recorimonas
sp001915065	refinitica
sp002506485	pimenitoga
sp003162615	sacopibula
sp900319985	cerarisca
sp003559215	semifivita
sp012964335	debucitoga
sp003019595	senacitas
sp002687075	domabitura
sp002713585	viragilega
sp000430485	herinitia
sp001663375	cisalitoga
sp002763115	vepalibula
sp011337845	delubastra
sp9989u	ruricatica
sp003154335	relecedo
sp000746765	necopibra
sp009184545	vagabatio
sp002496565	coninugo
sp9912u	monopitrix
sp001950595	sifunousia
sp002494725	conarimonia
sp8339u	tetenisca
sp001516765	recoribula
sp002728275	maxilimonas
sp002495055	turicitura
sp009843815	vehemitica
sp001512965	turifibula
sp002731395	bacifousia
sp002688315	nehalibula
sp002502625	serotimonas
sp004347865	direcitia
sp000494185	caravibra
sp002722695	nugigisca
sp001587575	tubicitia
sp003162115	cimelitia
sp003116855	detunitrix
sp11423u	figilitoga
sp003557905	cenacax
sp002498985	mirabitia
sp002254825	detesimonia
sp003157895	hemitugo
sp002496955	nocenitas
sp002502605	curotibula
sp002067755	recogibula
sp001593925	nosociforma
sp903864915	dimadibra
sp002509165	tabifousia
sp10192u	viburitica
sp002685415	dehisax
sp002498185	delucitia
sp002495525	delubitio
sp12207u	turibitudo
sp002685895	nocenitudo
sp009649835	hegumugo
sp001872315	deparibra
sp002496905	catagitoga
sp902768765	cenobimonas
sp002725275	sotulisca
sp002724775	nocumitoga
sp000402515	toluticella
sp003838185	colepedo
sp005879065	selecugo
sp005877225	redacago
sp001871535	manubimonia
sp903851445	lametitio
sp009787585	cadurugo
sp002506825	defulitrix
sp002506275	dilibibula
sp002505185	cocolitio
sp001507955	celumetta
sp003021785	caduriforma
sp002712285	cepulatio
sp002499865	betacago
sp002763335	salubitas
sp002498375	hexagatio
sp003724275	cacomitio
sp001872185	novilitica
sp10194u	minagifica
sp002497905	semidugo
sp005877075	defasiforma
sp009758405	cululitoga
sp005882905	manupilega
sp002737445	levidimonas
sp002702945	cemenigena
sp002726495	nugacimonia
sp002731655	divorilega
sp011772645	refocedo
sp002457145	tenemitrix
sp004348015	telefitrix
sp014075315	ranunilega
sp003663175	venunedo
sp002497765	monacastra
sp011373895	colapilega
sp002713325	verifedo
sp002506875	funivugo
sp011362245	virecitoga
sp003724325	retunifica
sp002690535	demigicula
sp002172355	depelatica
sp005223125	ludibitudo
sp002497685	demogugo
sp001786415	coninigena
sp003661945	semodivita
sp003661505	gasifitio
sp002509085	regifax
sp013415695	cucuricella
sp001563965	reduvibra
sp002201895	pedifitudo
sp007122455	demagitudo
sp000389735	colutetta
sp002505805	benevitio
sp900318035	subofax
sp001564205	notabitudo
sp003649495	depupiforma
sp003675875	gemebousia
sp002496485	diluvitoga
sp003663115	lubenifica
sp011369655	hemidifica
sp011364715	fetififica
sp000746785	decapastra
sp003990725	calipax
sp003569705	vinolisca
sp000806155	saxifatio
sp002505585	rosaritio
sp002457555	recucugo
sp009903405	depubousia
sp011366425	ludifivita
sp007131205	vatilatica
sp003649145	velivilenta
sp001399795	velivessa
sp11852u	lutulimonia
sp006954465	refiniforma
sp000830295	volubimonia
sp903825675	decinastra
sp001871595	latibilenta
sp002698225	turicitrix
sp003663325	desomigena
sp003584625	bisacivita
sp002505685	sacomicula
sp002762705	lavabax
sp002697705	hirunax
sp003601605	capucessa
sp003838065	vatilifica
sp12206u	veridibra
sp003670115	cuferatio
sp002779595	depubiforma
sp011364525	docibedo
sp900313645	cadavousia
sp011367065	denicitudo
sp002504435	denecicula
sp002496725	funebatica
sp009904015	galacicula
sp9638u	conubax
sp002497965	conifitudo
sp011364565	colapibula
sp004347825	refacibula
sp003662515	gerunisca
sp003650975	cohonifica
sp000496215	dicibicula
sp011363915	curotimonas
sp002506755	deforivita
sp002495625	cibarastra
sp902787415	catecugo
sp003560875	colapitrix
sp001587675	tenebatica
sp002067035	depicibula
sp003602415	buxanibula
sp900316895	lubeniforma
sp011620785	corocastra
sp003661385	decinibra
sp900320955	vicativita
sp002067325	negotilega
sp004347955	depelivita
sp003565715	maxilago
sp004765795	nubeciforma
sp002727675	categentia
sp002067795	cuferatica
sp011053655	cotenisca
sp009783705	demaditio
sp002923215	delucetta
sp003022865	perexibra
sp003650925	cocodigena
sp000494145	desonax
sp003649185	defaciforma
sp003229935	monocastra
sp011364235	desepetta
sp009903825	denavilenta
sp005878635	medimiforma
sp001484685	fidenetta
sp002899805	seposigena
sp003551725	semivitrix
sp003141855	panopimonas
sp903858385	conifitia
sp003553085	baditilega
sp013342135	homagitia
sp8940u	casabibula
sp002696315	conarigena
sp011361745	vinulugo
sp002497285	ficedentia
sp002509325	defenitica
sp001563875	cerifisca
sp008729015	sanabitio
sp009781675	semodastra
sp002897655	daducax
sp003170935	puruledo
sp000969965	bipinitio
sp8915u	levidilega
sp005882895	colimedo
sp002010195	cilicilega
sp007118145	hiruditio
sp002011165	cepurivita
sp002723635	cenodetta
sp002496845	malivimonia
sp004195435	ludibastra
sp003023165	molecousia
sp002710015	pedifilega
sp003663415	binocatio
sp011051215	cerebatio
sp011364865	pedifetta
sp003663525	negotedo
sp002688165	dicanimonas
sp002495025	recucetta
sp002011035	pinacax
sp001564135	funivilega
sp005888735	nugigatica
sp903877165	lavabifica
sp002010305	homagibula
sp011364805	terebessa
sp011373445	sotulessa
sp7939u	defalitas
sp002507425	hexagicula
sp013538715	vatilastra
sp001920395	pavimentia
sp005878385	catecicella
sp001564115	ratifetta
sp002499325	depicibra
sp009674625	cucurisca
sp011523285	bacifitudo
sp903904885	tegumisca
sp002172185	tolutitio
sp002495945	vatiliforma
sp011366705	luculitudo
sp002506905	penecitoga
sp001563795	dilecedo
sp002724815	petulitura
sp004195525	vavasitia
sp002495645	depetago
sp004376295	depupimonia
sp011054345	vehicitas
sp002499545	cerifousia
sp002499905	dicanitura
sp009674585	direcigena
sp002728035	ceromugo
sp013415565	cataliforma
sp009787175	cacopitio
sp011373965	peraditudo
sp003702495	decinetta
sp005877305	papavitudo
sp001919285	mimogivita
sp005877365	navifitas
sp001564255	tenemilenta
sp001856825	ceraribula
sp900322125	benivedo
sp009690625	depetitoga
sp001871475	conamitura
sp007128245	peridimonas
sp002726845	cepuressa
sp000402075	cerofastra
sp002490245	decomicella
sp007129135	cerebago
sp003022845	relapax
sp001593865	monimilega
sp003649695	cenobicella
sp002715725	denixedo
sp002254975	legifibra
sp002255045	depicimonas
sp004195715	dilacicella
sp011364265	famelicula
sp003551675	defesitica
sp8261u	solififorma
sp10161u	cilibibula
sp001564275	bugilimonia
sp004116405	nutabibra
sp002509095	caduredo
sp003022685	desonentia
sp011367275	delapigena
sp002687355	conigigena
sp001871495	denecitica
sp002499085	nucifatio
sp004375695	minuricella
sp002716085	dedigifica
sp009601705	nehalentia
sp002726395	foricatica
sp002720275	doxolitio
sp002507125	celumatio
sp12570u	genocibula
sp011375725	taraxitia
sp003602475	bipatisca
sp007129655	melilitas
sp002503285	manupibula
sp001871415	purulousia
sp002254385	buxifatio
sp006954405	levifimonia
sp011364615	nugigicula
sp009674605	secunentia
sp003164815	salubicula
sp003649225	dehisitudo
sp002900555	homulitio
sp003724285	ludififica
sp011364825	pepenimonia
sp003663045	voragax
sp8734u	videlitas
sp003649665	metapentia
sp002706615	modifatio
sp9354u	bicalitia
sp012797575	cuferiforma
sp003650815	semififorma
sp002256595	manufetta
sp900321995	semivisca
sp001469875	pericitoga
sp003554605	pepenivita
sp002697105	refulilega
sp10036u	divolentia
sp013287585	necopimonas
sp002497245	navifatio
sp004195515	navifitrix
sp002503135	pavicentia
sp012027325	semimago
sp011363945	vitigiforma
sp011364585	manuficella
sp011366665	volubitas
sp002689105	panifugo
sp003158275	citocilega
sp903835385	turicitio
sp011367225	subaciforma
sp006954425	decamentia
sp003601785	penicatio
sp002502965	cucurousia
sp003021015	malivisca
sp002494785	panopatica
sp8725u	tiruniforma
sp009887135	vicecifica
sp003194425	panificella
sp005883075	dilemigena
sp003602515	pimenitas
sp007571135	denixibula
sp004195615	depacugo
sp002495885	vinuligena
sp009617995	perexitoga
sp001560915	hemidessa
sp8574u	cibiciforma
sp009779045	luticicella
sp004195635	verecago
sp001918745	catabiforma
sp005878615	deforicula
sp003662765	horomisca
sp902514485	dinupatio
sp004212035	rubeficella
sp008389435	senacivita
sp013288545	fiducitia
sp002693165	ruricitrix
sp011372955	nocenicula
sp003649515	dimacicula
sp000830275	repagitrix
sp002506665	senipitura
sp900314615	molecicella
sp9513u	turicilenta
sp012027495	ratifimonas
sp011620845	negotiforma
sp902386025	ridibilega
sp003602605	telefilega
sp002722595	conubitia
sp012027395	denecibula
sp003266145	cinipigena
sp013153555	funamisca
sp009806985	deforitica
sp007121575	rubicugo
sp002731195	nidifitrix
sp013041945	semilivita
sp014361195	bimotetta
sp002763085	mavorigena
sp000403645	miracicella
sp003021705	detecago
sp005884195	relecastra
sp002719635	latibitrix
sp002171315	celumatica
sp902384685	diriticula
sp002686855	detumivita
sp001940655	dicimugo
sp002067065	saxopimonia
sp002688875	catafitio
sp002687185	binocitio
sp902801725	dapificula
sp012513715	paracifica
sp10923u	domabivita
sp003602635	cilotessa
sp002011395	cenobedo
sp013335235	pocilicella
sp001485575	gasifax
sp902531985	cenoditica
sp002505935	decapitoga
sp003694385	manupitica
sp012962055	manibatica
sp012026795	selibimonas
sp008297865	defasigena
sp004376975	canacatica
sp003560595	mirifousia
sp002254395	peridedo
sp011355145	pavimedo
sp004332335	derunessa
sp011366945	minagilega
sp011370995	decomimonia
sp011332645	tubicatio
sp001723845	cimititura
sp003649565	benepentia
sp012728895	penecetta
sp011440375	vepalivita
sp001516585	velifitica
sp003561825	manupugo
sp003694055	calipastra
sp006274605	detoretta
sp005881695	robigitio
sp003694525	bicubax
sp004015825	vocififorma
sp014384375	sacopax
sp012027355	nutabetta
sp903832205	dilibilega
sp003663025	decenigena
sp003023565	totidastra
sp005882955	seposisca
sp003345555	cadurax
sp002254405	ficedetta
sp002496385	didacitoga
sp013114705	supelago
sp002025255	lapicigena
sp009937025	peripilenta
sp003722075	perexibula
sp007050895	duricimonia
sp002687825	tenebetta
sp006543045	nucifitrix
sp003663225	loraritio
sp003649085	cilotifica
sp003601535	detosisca
sp003022925	cinipimonas
sp002762785	resacimonia
sp008709555	siticigena
sp012044895	detunilega
sp007130455	morigimonia
sp011361945	repudago
sp003661265	mirabivita
sp002068885	rosacitura
sp004524725	decupousia
sp000309865	monimessa
sp004765805	viragitio
sp005888695	risibitoga
sp002763155	velifibra
sp003266065	dedigastra
sp003649715	gemebentia
sp002694245	conarugo
sp000828575	xenodatio
sp011362255	domipibula
sp012961645	cilotivita
sp002506365	capilousia
sp002497485	senacedo
sp902385655	bugilivita
sp002839705	capudax
sp001593875	catabedo
sp011605835	hegumimonia
sp011337925	resurilega
sp011372935	mahemitrix
sp003650625	rumifastra
sp001940705	forabugo
sp003551265	homuliforma
sp002688775	visifitudo
sp001563995	negotimonas
sp013043295	malogedo
sp003555395	vinolifica
sp012270265	tumefugo
sp10117u	molecastra
sp002712575	vehicitudo
sp003020965	perexago
sp007117455	tegumimonas
sp10516u	ceromicula
sp003336485	tomogifica
sp902385765	manupax
sp012729095	turilentia
sp10834u	papilisca
sp002697065	pomifitica
sp9653u	debucitio
sp011375845	manibax
sp002497295	canacitura
sp003022905	catobivita
sp902384525	foricago
sp013153145	lucerentia
sp000296615	hecaticula
sp003298465	homogibula
sp012511245	lucubibula
sp001563325	sonabigena
sp002011215	bucolisca
sp001861355	murilitio
sp900767505	tabitatio
sp002723045	ceromitica
sp902772665	bicodimonas
sp003553825	vigenitica
sp013456555	tenemiforma
sp013391085	colutitudo
sp902625885	catecimonia
sp11020u	bigaritio
sp003021975	benepastra
sp012222305	bonifago
sp002507175	supelimonas
sp009741825	cacopitudo
sp001723835	vigenitoga
sp000405685	bugiligena
sp013166835	pulegibula
sp002067155	redunago
sp013002265	colutatica
sp011364925	cicatilega
sp005878485	minagitura
sp011524855	nugivicula
sp011331795	refunitas
sp013572355	domabicella
sp003021285	relenifica
sp004297575	colimitrix
sp002496065	decunousia
sp013821245	menapimonas
sp002498285	desoretta
sp011363135	nubecitudo
sp009914725	bifarax
sp013152905	fefelessa
sp002730325	daducatica
sp011319465	bigemugo
sp003599055	ceroficula
sp005878915	filifugo
sp013415665	direpitudo
sp000224475	cuticago
sp014361245	caduricula
sp003661465	divorimonas
sp002687795	nocumilega
sp009889515	lapicicula
sp011358535	didacitudo
sp011391755	metabastra
sp013154335	dilicilega
sp903923795	lupanastra
sp003721435	fetulugo
sp003660555	fumifilega
sp001940725	dimidugo
sp011334705	panifago
sp004099695	repecifica
sp902512865	depubatio
sp003555465	penurimonas
sp003602535	figilisca
sp002496425	funivitica
sp014523665	tomacago
sp003551125	divolago
sp002506605	siminibra
sp013152815	foricetta
sp002731905	desucugo
sp002504405	lubenitoga
sp013425325	semimitia
sp002688325	sacopitrix
sp011358475	munifentia
sp002254565	colimimonia
sp009694755	cinefitudo
sp011380195	monumisca
sp013139905	holisessa
sp902573115	redunimonas
sp000211475	colimibula
sp009741975	bipalastra
sp011370395	pomifitura
sp002499185	cicarousia
sp902601345	homunibra
sp002495845	gerunatica
sp002170315	cerifatio
sp003663535	denigentia
sp003650865	deciticella
sp002494895	sicunatio
sp014384455	rutabousia
sp014381835	cosidilenta
sp902385515	dilibisca
sp009936765	decapiforma
sp002508425	veriditica
sp007135505	supelatio
sp902796575	tegumax
sp902384555	homicicula
sp009831625	denorousia
sp002713185	laculax
sp002898355	verecibra
sp011333845	vagabago
sp003151735	revecugo
sp003021175	cicatifica
sp005239615	semodicula
sp903893865	manubitudo
sp003662645	duponugo
sp009779205	cacalentia
sp012519255	dupunitas
sp011368255	pecunitura
sp013839425	hibisitia
sp002498065	penicetta
sp009784145	viginousia
sp012521035	delubax
sp001541925	sugililenta
sp003021655	cimelitudo
sp009889685	mimogilenta
sp011380145	fetifousia
sp003558235	dimadedo
sp003605575	decenatio
sp001940755	defetax
sp013415575	semodigena
sp011332735	daducatio
sp003663445	detosiforma
sp014240455	gemebastra
sp003662325	detecentia
sp011355205	dimadatio
sp009780575	baditax
sp002498205	hexamigena
sp000496195	revecitudo
sp002505485	carecentia
sp902794475	venabibra
sp000499765	fetutentia
sp002839575	nefanimonas
sp011362965	papavimonia
sp002255065	detesitas
sp002688035	defenentia
sp005543295	cimitilenta
sp001595945	sicubitia
sp000246735	cilibentia
sp007135435	totiditrix
sp002762795	vehicetta
sp003649845	lucubitoga
sp013388895	necopitica
sp004681185	venucibra
sp013375405	murelimonia
sp002503545	sonipago
sp003661865	selecilega
sp013375355	tirocitura
sp011358415	luticitudo
sp004524515	sonivisca
sp011373505	maledilega
sp009889625	lucifitudo
sp001189275	lutuligena
sp002726865	venefessa
sp013153105	dilecetta
sp003096255	viburetta
sp000746685	bisacessa
sp002692685	divulibra
sp902529885	cibicessa
sp002506025	depecitoga
sp003661015	depasicula
sp11384u	dinupentia
sp007050885	manomago
sp003942085	petulitica
sp011358735	fetififorma
sp004698125	cenotitudo
sp001515185	depecivita
sp000230955	culigastra
sp003023185	sacopetta
sp002701145	nocumitas
sp003022945	metapitoga
sp902608175	legifibula
sp003157235	celumastra
sp902385045	depacisca
sp011367145	munifedo
sp005239175	medimitio
sp002781805	benemimonia
sp10107u	malededo
sp002698885	lenocigena
sp001510295	valefisca
sp001412335	defenibula
sp004524425	turifitura
sp013375475	bipinax
sp002010045	pacifitio
sp003176995	loceletta
sp011391345	semapifica
sp003022085	lupanifica
sp003602665	subabugo
sp013154085	divorigena
sp002505525	catecitas
sp011333755	taxilitoga
sp009665115	conopicula
sp012515445	depopibula
sp902777885	patibastra
sp009903945	loripentia
sp011367965	colapitura
sp007117145	detecax
sp007116645	nugacivita
sp003230355	holisilenta
sp003661905	siminigena
sp003023535	desacimonas
sp004745425	mavoretta
sp001587715	desucibra
sp902158735	morigibula
sp002688415	funamitica
sp003345595	venabessa
sp003555025	filifitas
sp011380095	pulegilega
sp013153895	dibucitrix
sp009781395	solipitoga
sp000221185	bicipastra
sp011049295	colutitura
sp002728565	bonitilenta
sp013154355	vigenitia
sp003550345	retecisca
sp002855745	vicecitrix
sp002506015	deparugo
sp011361855	mutabiforma
sp014078545	rubeciforma
sp003135935	ceraratio
sp003315675	noninatica
sp004212095	visibitudo
sp002254885	categiforma
sp002508545	sonipastra
sp003344655	retecitia
sp902386205	nidifilenta
sp002495405	subabimonia
sp001563905	nubigatica
sp002683155	necubessa
sp002495235	repuritica
sp003601775	voragitio
sp008080765	depicicula
sp012729995	desoressa
sp013388945	benivastra
sp012516785	docibax
sp002687815	gemebibula
sp009834785	mimogatio
sp003020925	recogitia
sp002254665	rubefigena
sp904067545	notabitura
sp903900025	monocimonas
sp9915u	saxifitudo
sp10204u	refinugo
sp011319475	vinolitica
sp002719615	legifitoga
sp001989615	recoritica
sp002707335	depecibula
sp013426015	repurousia
sp002701965	bicorousia
sp003563585	cicatitia
sp002719475	semidastra
sp011362025	holisicella
sp011367155	repudicula
sp902769175	milificula
sp001595785	decupivita
sp009937205	molecivita
sp902788255	voragugo
sp902385225	tibicousia
sp10205u	denecedo
sp003649205	benemessa
sp000220355	vitifitrix
sp003649915	desepastra
sp011605865	volucastra
sp003491305	periditia
sp001399805	didacigena
sp001261915	menapastra
sp007833275	fumacitoga
sp009780795	peropax
sp004524535	conamax
sp002494645	fetuletta
sp009831575	pinacimonas
sp013425455	sitelibra
sp002690445	loraritoga
sp011369545	catalitia
sp000402775	colopitas
sp001563805	nugigivita
sp003649615	bicapitio
sp003553905	dinupibra
sp002727695	malivetta
sp013374465	subacedo
sp005877205	nubigifica
sp012520845	malivessa
sp013202955	cituvitia
sp013375495	deforatio
sp012719315	verifilenta
sp002720055	semiledo
sp003022725	dilogitica
sp002011235	sonipivita
sp009778265	recoritas
sp002497985	labecedo
sp003697845	rudecousia
sp003023485	volubibula
sp013343275	papilicula
sp002502295	vitifitas
sp013415595	derecifica
sp002067895	solivitoga
sp014212355	dilemiforma
sp005049285	homolibula
sp012329085	catabitudo
sp004524565	bucelitura
sp011331255	cuferibra
sp004524595	catafilenta
sp002503985	xeramivita
sp002494765	hemiditudo
sp012518265	musulimonia
sp004114375	petulax
sp003020985	decacivita
sp002496635	bifaretta
sp009618475	repepetta
sp003599145	decupimonia
sp902606945	laxiticella
sp003133625	vilitifica
sp011050175	nugacitica
sp011373045	monodatio
sp002726275	siminitas
sp012959275	rorulitas
sp003554465	demogatio
sp002878135	remulitrix
sp004525545	denupifica
sp002509405	curacugo
sp902770715	domabisca
sp011056815	luticago
sp001875345	detesetta
sp11998u	metabicella
sp003558085	monimitrix
sp003660905	metabitoga
sp003268005	diludicula
sp003056285	vivifugo
sp003702525	carucimonia
sp003694805	cinefitica
sp007117065	defosatica
sp003602575	fatifastra
sp002067045	detumitio
sp902514275	demaditoga
sp003554235	caravago
sp004297185	demogentia
sp002825465	conamitudo
sp003662535	cimelousia
sp002898655	sotulitudo
sp007133845	cocibiforma
sp009887195	derunitia
sp014239585	semipitudo
sp001563335	cisoriforma
sp003660635	celumicella
sp005878525	decupitura
sp002779075	funivedo
sp003552585	bipinitia
sp011358645	demuligena
sp003661775	cicatatica
sp902385625	nicomifica
sp002501655	semipitio
sp002685315	tolutentia
sp004137855	tabititoga
sp012959435	bicipessa
sp009784745	visibiforma
sp012510295	voragedo
sp011333035	peropibula
sp000806015	nutabastra
sp013378385	paropitio
sp005191415	tenebatio
sp003601795	repecitia
sp001800815	domigivita
sp002720115	duricigena
sp002010075	bigaricula
sp003663565	semapimonas
sp002731115	ficulastra
sp011043775	cacalitoga
sp002495225	venucago
sp011358085	telefitura
sp10216u	holisax
sp013153275	detotiforma
sp002254415	ranunimonas
sp003702465	miracibra
sp003023195	velifago
sp013180605	coticitura
sp011055275	foricilega
sp002496015	ridibimonas
sp002499455	necubigena
sp004211975	verifentia
sp009992175	pinigibra
sp002495675	demagibra
sp002501695	homagicella
sp002727485	ducilibula
sp011358095	pericastra
sp008974855	linigilega
sp003661525	duricitura
sp003650545	conifibra
sp007128515	peripibula
sp902627615	homulitoga
sp002508635	pinacifica
sp002457605	milifedo
sp004212135	malificula
sp011329125	reforitrix
sp011333955	medimimonia
sp011355215	semigentia
sp002706065	duricastra
sp002841105	cicilivita
sp003650585	hemitimonia
sp002501965	denigiforma
sp013791785	vinolugo
sp005239845	famelitas
sp000806115	bicodentia
sp010747475	detecitica
sp9212u	ludibitica
sp002497345	manomitio
sp003170075	satacastra
sp002509665	levidigena
sp007122875	desuritudo
sp002504725	vicecilega
sp903916665	pinigigena
sp013374505	semimatio
sp003650785	caduratica
sp011334515	dicimibra
sp004524445	teniledo
sp002835825	fatilousia
sp011055445	cinipibula
sp002686195	malivilega
sp003554965	tenilimonas
sp011331665	depecitio
sp002499785	peracetta
sp003022005	licenibra
sp011620825	palifimonia
sp002730775	senipigena
sp001940805	malifatica
sp003552885	cacalastra
sp007117735	paralitudo
sp903873955	mimogicula
sp900198835	denomitas
sp014240285	dehinitia
sp001563915	repecilega
sp013388925	celamedo
sp003020945	detenedo
sp013154035	taxilivita
sp012027645	bisuligena
sp003602595	siticilenta
sp005883085	fibiciforma
sp003661185	locelitica
sp003021105	hirunastra
sp011525095	bipinastra
sp10200u	retunitudo
sp002689985	manupitura
sp002709285	vitabicella
sp003663055	solipax
sp002506175	podagilega
sp001775955	cisalitio
sp005938085	verifatio
sp002688965	dibapitudo
sp003649445	cemenimonia
sp014189675	turibatio
sp014238095	dibucugo
sp004212155	figilessa
sp003164295	cadavibra
sp005888675	papilessa
sp002457595	pavimatica
sp007127385	cituvousia
sp001784635	morigetta
sp002763265	vicaticula
sp003162655	peropicula
sp013388835	decitimonas
sp011363825	dececisca
sp902386255	refinetta
sp8516u	malagitoga
sp002067265	recomisca
sp012719175	coturilenta
sp001543015	semimibra
sp012959845	venefitio
sp002496395	malififica
sp011605725	gasifitrix
sp903831045	colopitoga
sp003431325	demadiforma
sp009777615	solifedo
sp003661825	saxopousia
sp003165195	bimetimonia
sp002009975	citipetta
sp003661105	siligitoga
sp002067275	nivomousia
sp013138805	hibisetta
sp000691865	peropisca
sp003660975	desomitica
sp009889585	telefetta
sp009697485	medimessa
sp003662715	lucifigena
sp011364965	detepitudo
sp902384455	televivita
sp004322465	bimetastra
sp903930505	malivitrix
sp001775965	sicubimonia
sp002788515	vehemimonas
sp009377575	categitica
sp013402875	codififorma
sp011334665	monogitrix
sp902386535	nugivatica
sp002255105	desonedo
sp003601695	cilibigena
sp003021725	monopago
sp002505765	minurugo
sp011364985	disidatica
sp013402815	cosiditica
sp012522645	pavicigena
sp000484975	cepulitudo
sp003695435	volunibra
sp012511995	modififica
sp014523515	catafibra
sp011052825	fatifibra
sp013114725	cuferisca
sp005435165	nefanatio
sp011042755	culibastra
sp902385255	laculousia
sp003695045	giganicella
sp014523485	momorentia
sp011335085	dehisimonia
sp002506255	recumatio
sp009887095	satacifica
sp001316285	pavimax
sp013215285	divulitas
sp003663345	rubecilenta
sp002686215	fecunitrix
sp002499005	pavimibra
sp014061035	lucubugo
sp902771435	sonipisca
sp009776625	ceromax
sp011056395	lenocetta
sp003552325	cufericula
sp013388905	dilemessa
sp003287355	decapetta
sp002067485	detorugo
sp011333975	derunisca
sp002254895	volucitura
sp002505645	dicibitudo
sp002067095	homilitia
sp003661975	murilimonas
sp011373125	domigax
sp902384935	genocedo
sp013288705	venabetta
sp003665925	deculimonia
sp003562145	vatililenta
sp000830315	lugubibra
sp011362825	virecicula
sp10219u	lavaciforma
sp003034855	cibicitudo
sp001625445	gasomitas
sp009379865	futatiforma
sp013154235	depocax
sp902560445	mirabitudo
sp011375785	fibicifica
sp003702545	risibugo
sp003021335	decinitas
sp003141335	venucitudo
sp002067865	masocimonia
sp013151465	taraxicella
sp001593935	noninitia
sp10242u	dinupitio
sp902520595	rorifentia
sp003730195	cepurugo
sp012798335	bonifatica
sp012729535	virecax
sp002689345	virecitudo
sp014239955	locupifica
sp011371845	secunitas
sp011367165	rubigitura
sp002495535	xenopentia
sp005191425	decitessa
sp008122205	resulitoga
sp013540595	gasomatica
sp013202845	saburax
sp009776695	sifunugo
sp014523685	selecicula
sp001723855	giganousia
sp900299125	bisuletta
sp002495315	domipivita
sp013154145	cosigitia
sp002762915	faticibula
sp014523625	dececicula
sp902605365	viragitas
sp011374155	benemastra
sp002502135	bonititio
sp002779065	sacomentia
sp002503045	subodicella
sp002708015	vacilitudo
sp014297435	maleditoga
sp011053435	cenobax
sp002254745	loraritica
sp003602485	subadigena
sp011332615	benevisca
sp013152575	monodivita
sp000496175	sanabimonia
sp003661605	bifarifica
sp009776675	citipifica
sp005878415	paracibra
sp002725475	xeramatio
sp011055585	cicaratica
sp003660925	decititica
sp014361445	colubifica
sp013153395	mimogibra
sp002839605	sonabibula
sp011049195	cosigilenta
sp013375455	desucedo
sp007280465	catalimonia
sp902386085	sarabax
sp014361205	selecessa
sp002762845	redacitudo
sp002254545	petulitia
sp003662305	vacilicula
sp902385025	vitabitrix
sp002688095	butubibra
sp011045995	veridibula
sp012027555	fatilitia
sp013824915	fumacitia
sp009786295	rurigilenta
sp002498605	furibiforma
sp013425375	benevimonia
sp002067315	bigaritas
sp002718215	diluditura
sp900769095	lameticella
sp005888745	cimitibula
sp001896725	bisulitia
sp008080815	selecax
sp012026835	cacopessa
sp002503825	virecigena
sp002727515	holovastra
sp902812485	pacifisca
sp002069705	figilatica
sp013425405	denunedo
sp903892905	citocimonia
sp004375715	laculastra
sp004087835	rumifousia
sp003554115	mutabilenta
sp002172375	betaciforma
sp003175215	peracago
sp002688015	fibicisca
sp007570915	depecessa
sp002507085	resulicella
sp002763345	pavicicula
sp002715545	rudecitas
sp002877855	volucugo
sp011364905	denunax
sp004297665	lametago
sp003649745	nubecedo
sp014240055	minagibra
sp003663355	subadilenta
sp002718695	lucubitia
sp002502855	peropousia
sp8695u	vinacicella
sp903884115	recumitudo
sp007118975	cerucetta
sp002505325	ficedax
sp002503665	deforimonia
sp003023465	monacimonas
sp902795935	modifitia
sp011362635	gasomitudo
sp012510335	docibilenta
sp003660485	tibicax
sp903920925	manomitia
sp003660865	cuticatica
sp001595915	bacifitrix
sp001896715	depetitia
sp011333475	luculentia
sp000220375	caravatio
sp011522915	bucelitrix
sp001776015	desuletta
sp004376645	cobalastra
sp903828655	ludimicula
sp8098u	homolago
sp003086555	siticitas
sp003022815	viripitas
sp002010215	valefedo
sp002778455	vitigigena
sp011370275	halucastra
sp002687775	tegimessa
sp000744455	citocitio
sp003660605	remedessa
sp013152845	maledugo
sp005881615	pacifitia
sp008080735	lenimisca
sp10210u	rurigago
sp003021755	veliviforma
sp011389375	negotitoga
sp009712615	vitabitudo
sp902573085	peridivita
sp002010285	culigilega
sp902812495	necopitrix
sp004944975	duponibula
sp013415865	decucetta
sp000691505	loceledo
sp013288145	sicarastra
sp014361295	bicinago
sp002505355	cimelitrix
sp003651045	butubicella
sp003978865	catabitura
sp001595885	direcibula
sp001714685	bicorisca
sp001548675	lanigentia
sp011369665	mutabetta
sp002509745	corocatio
sp002010975	cerofitura
sp005877345	defositrix
sp001729965	maheliforma
sp002689565	capiletta
sp001875425	bicodilega
sp009889605	dececifica
sp012518185	ranunimonia
sp014361085	pavimitio
sp003266105	fuligiforma
sp8941u	homulimonas
sp013403005	cacalago
sp011380285	laxitago
sp005884605	viginibra
sp012027595	letifigena
sp011048835	rurigatica
sp011047985	catapugo
sp011363025	homulitrix
sp001564285	velifilega
sp002170775	bipinetta
sp011338225	divolitio
sp002214525	semimimonas
sp009831555	metapugo
sp902511005	seposatica
sp013204355	cetaritura
sp013415795	nucifitia
sp003194435	monoditas
sp002688825	ludimimonas
sp001742785	caravimonas
sp014361095	demulitas
sp005240025	feficastra
sp011605715	cohoretta
sp012027305	retunugo
sp011620765	cicaribula
sp001800825	ludibicula
sp004376265	casigilenta
sp013538675	tenemibra
sp003662485	telegilega
sp003266075	pavimivita
sp001761425	bonitentia
sp002457155	tubicugo
sp902386555	luticitia
sp005406125	cacomisca
sp903915225	bovicibula
sp902625325	sifunimonas
sp902782595	desomax
sp003602645	diluviforma
sp003551065	holisitura
sp002504495	solifugo
sp013044425	bugiledo
sp003978665	subacifica
sp008080745	tolutatio
sp001875365	pinigetta
sp007117755	funivigena
sp003662985	cobalivita
sp002730445	catabetta
sp003021085	nocumicella
sp002499505	bipatitudo
sp000965745	rumifimonas
sp002502705	detumessa
sp902563095	purulicula
sp011363705	senacibra
sp009777005	catililenta
sp003601875	hexapiforma
sp000405225	megalimonia
sp002255025	doxolimonia
sp005878375	forabibula
sp003023405	defeticella
sp003663585	fetifimonia
sp003589585	recumitoga
sp003164755	bucoletta
sp002495205	bucoligena
sp002507205	repuditio
sp005879045	cerimifica
sp001421185	decinitrix
sp003694495	xeropessa
sp013215525	pinigitica
sp002501765	laxititoga
sp005878995	pabilitio
sp002011085	domicicula
sp902386385	citipigena
sp014240385	velivitudo
sp012799645	panopitudo
sp003104905	capililega
sp007116915	decatigena
sp902384585	benififica
sp007116295	volubitura
sp013694585	deparitia
sp003564925	hexamicula
sp007280335	verifimonas
sp002694585	turibessa
sp004347925	deteciforma
sp014240255	femelitas
sp013911135	turilitura
sp011334735	daducentia
sp011331095	nugacax
sp012964965	venunitudo
sp903828975	tetenentia
sp002725495	velivitas
sp013839515	recumiforma
sp013911465	melilitrix
sp005883695	cacomilenta
sp002718915	homunitudo
sp004376385	lanifastra
sp003193815	cocodousia
sp002686295	defulago
sp002502685	caruniforma
sp002708385	doxoletta
sp002572525	pedepatica
sp001317345	desupedo
sp003661745	bicalastra
sp10207u	colutisca
sp009778385	momorimonia
sp002509225	baditibra
sp005878955	caseligena
sp10154u	nucififorma
sp900774055	linigax
sp005888635	loceligena
sp002502365	diluvatio
sp003781945	doxolimonas
sp000960885	morigago
sp10214u	ludifitio
sp902785855	melilentia
sp002495325	cilotisca
sp009776495	culilitrix
sp003009795	venunifica
sp003693875	taxilifica
sp003666015	maxumimonia
sp002708695	paracicula
sp013180585	conifax
sp002068435	bicinousia
sp005878325	decucax
sp013390745	depicitica
sp000327505	tomacitudo
sp002011355	direpibula
sp004118325	biparatio
sp002067635	lucelimonia
sp013178225	carecatio
sp003551945	rumifitica
sp002254595	purulitas
sp002688265	fibicicula
sp011365025	recumibula
sp002713205	ceracago
sp002727275	conubimonia
sp003315655	halucivita
sp001918765	sicarifica
sp011335015	lapilibula
sp002506595	defuniforma
sp902764015	cepuledo
sp004377185	totidicella
sp014361455	lutulitudo
sp002499015	codifitudo
sp001940665	bicubilenta
sp000025525	lenocilega
sp011375895	nicometta
sp009783635	turiledo
sp011372335	verifitudo
sp007119345	saxifitia
sp013154205	dehinigena
sp013867245	megalugo
sp902578515	rutabatio
sp902590655	ludimentia
sp902386115	melopessa
sp009694725	cicativita
sp011375775	mutabax
sp003661365	biveritia
sp001786395	notacitura
sp002508495	depopetta
sp902789505	mavoredo
sp011046235	xeropitas
sp013180565	masocitrix
sp004524435	decucastra
sp011049045	solivastra
sp011045925	resuritoga
sp000350305	capucicella
sp013166775	buxifimonia
sp002494885	pedepetta
sp001629205	cocolax
sp002717835	ludimitia
sp002780285	subabessa
sp001510275	depupisca
sp001564035	bulapax
sp002505945	resalifica
sp013360305	refocicella
sp002686355	bigemitoga
sp012798365	celumitoga
sp002011075	buxifitura
sp902158745	viburatio
sp009617975	biverigena
sp002694525	lupanax
sp003161815	nefanitas
sp009903795	desomiforma
sp002712645	diluvitudo
sp004524365	lavabilenta
sp005222965	homoligena
sp001316245	nubififorma
sp014523595	cunabibula
sp002286985	cacalilenta
sp902763685	relecifica
sp003554845	facunax
sp013140415	buxifessa
sp001593855	cenobatio
sp003164415	telegicula
sp002506705	selibilega
sp014384685	ratifigena
sp003648985	tubicedo
sp003266165	recomibra
sp002067705	funamitoga
sp003144275	lavabiforma
sp005888755	melopifica
sp014523495	betacilega
sp011526375	lacinilenta
sp007123105	delacitio
sp000416085	seposibra
sp001273385	malifago
sp003021325	vehemetta
sp012515075	gasomessa
sp005878985	maxiledo
sp014523525	rutabisca
sp003661965	solipedo
sp012799835	ficedimonia
sp011364975	veriditio
sp011370515	defulentia
sp002067365	pulegitoga
sp002762975	repurastra
sp002825535	cibicedo
sp003695265	saxopitica
sp003344565	ficuligena
sp009992215	mirabetta
sp007133925	defaricella
sp003135575	manubitrix
sp007421925	futatedo
sp002495735	ducilimonia
sp007118075	fecunicella
sp013203345	conaretta
sp012027615	podagousia
sp001412355	cerucatio
sp902783085	paropilenta
sp012030815	papilitudo
sp000416005	velifimonas
sp003009755	fetutigena
sp001482285	capabedo
sp903891505	cohoredo
sp003205235	nocumibra
sp002506515	lametimonas
sp009778275	demadedo
sp013391105	novilentia
sp002497075	curotisca
sp9640u	retecitoga
sp003649235	binocousia
sp003663695	fetifitia
sp000263735	cadavivita
sp902385155	cocibetta
sp002898395	tiguretta
sp902384675	negidatio
sp005239435	morigentia
sp001800745	detumitrix
sp9297u	vaciledo
sp001485535	sicubago
sp013203245	carucimonas
sp902606965	capudatica
sp11576u	revecibula
sp011605825	decinatio
sp003661125	funebibra
sp002762985	fiducimonas
sp011334385	cenobago
sp002838935	detepigena
sp012027635	cuticatio
sp001563885	vitifousia
sp013401515	divorastra
sp002502735	mirabastra
sp002699515	defacitas
sp013425425	gabinedo
sp008297795	deforedo
sp013138765	manuficula
sp013153595	valefilega
sp002457195	benivimonia
sp005222975	cerevitudo
sp902774605	dilogastra
sp002255135	domicitas
sp002704515	relenitio
sp003665935	verecilenta
sp013374385	corocitura
sp002718195	vicatimonas
sp003345545	bimotiforma
sp000970045	xeropibra
sp007571225	vigenilenta
sp005878515	derunifica
sp005878395	corocifica
sp003058365	cuticugo
sp004524545	fumifitudo
sp002900535	manubessa
sp002503705	subinifica
sp000746705	fumifastra
sp002897955	domabastra
sp002792115	xeramessa
sp013619005	decatilenta
sp002763025	nocenastra
sp003151535	defulifica
sp003009815	ficulitas
sp002763075	cilibibra
sp001273335	horomedo
sp002067685	repecisca
sp001593845	tomacigena
sp002254805	colutimonia
sp003160755	cululentia
sp011056475	turicicella
sp003559395	dehisigena
sp002208625	cuferastra
sp012798025	lucificula
sp002083985	foricifica
sp002685855	lenimentia
sp003560545	hemidax
sp902386135	tegumentia
sp012520015	funamivita
sp9950u	paropago
sp005879015	delapitas
sp013407275	negidicula
sp013139985	ceromago
sp014384555	cetaritica
sp903842985	domabibra
sp003663295	benemousia
sp002503105	sitelastra
sp002688355	duricifica
sp003152955	dehinessa
sp013153845	bigematio
sp014384445	panopiforma
sp001775995	vitigousia
sp002204705	vatilitoga
sp002495485	megalifica
sp003558335	cocolitica
sp009691355	hegumastra
sp004524385	fetulisca
sp002688335	resulilega
sp002702985	feditago
sp002506585	locupivita
sp012523385	metapigena
sp001768965	derunitoga
sp013390765	demulitia
sp011389055	risibousia
sp009784005	sarabitio
sp006740685	patibiforma
sp001800675	cocolitia
sp002509485	nefanilenta
sp003857025	malagigena
sp002687255	paraledo
sp007117405	bicipousia
sp005877185	curotousia
sp013290045	defalitoga
sp009741925	medimetta
sp002499705	fiducugo
sp011362975	homuletta
sp001940645	tomogimonia
sp003194445	defunetta
sp011056255	peropifica
sp011370445	luxuritica
sp003021305	lanifitrix
sp012840175	pavimitoga
sp903930485	demagitoga
sp003662995	locupicula
sp000375685	milipicula
sp003561665	cacopitas
sp003021005	dupunitura
sp000496235	favonibra
sp002687275	monumiforma
sp011362155	pedificella
sp002067565	vavasago
sp011372835	patibitica
sp013425335	homicitio
sp011380495	cerimigena
sp003550625	monogugo
sp013375485	canacago
sp002721085	pavicitura
sp002839645	cenotivita
sp014078525	gabinitia
sp011369595	baditivita
sp003601835	volucivita
sp9310u	notacilenta
sp012027425	conigousia
sp902566725	desonatica
sp011361905	doxolousia
sp011362045	giganilenta
sp002867475	regigimonas
sp003021745	xeropitia
sp011334955	defasatio
sp001774245	divulousia
sp003651105	deparigena
sp002763225	deculiforma
sp003022745	purulifica
sp902797085	hexapastra
sp011375665	vitifago
sp902812505	solivicula
sp900766745	holovigena
sp003601725	funiventia
sp002495185	cimelitura
sp011773475	biverimonas
sp003023785	fidenax
sp001563305	semilimonia
sp011605775	colopitrix
sp013138615	citocessa
sp002763035	detepousia
sp003694965	demogatica
sp002010925	pacifitudo
sp002779555	voragitica
sp001564145	resacitudo
sp002495065	laculimonia
sp002506335	dicimitudo
sp011389385	decacax
sp013154005	cosigedo
sp002508315	socagitio
sp002498125	funebago
sp000151205	cacalitio
sp005878665	veridedo
sp11803u	cenotitrix
sp011373385	nitelessa
sp002779235	bonititudo
sp011047595	verecivita
sp011734195	galacitica
sp003153895	hecatibula
sp001316265	venabitrix
sp902573015	cilibatio
sp009898475	venuniforma
sp011334935	fidenimonas
sp003351865	denorax
sp903921825	coticugo
sp011365055	luxuribra
sp014523695	lavabibula
sp003650935	munimimonia
sp013390785	cobaliforma
sp003660965	homunilega
sp009776805	homilitudo
sp002699425	volubicella
sp002710205	solacax
sp009903905	pecunisca
sp003662205	caselastra
sp10536u	nubificella
sp002688925	detotivita
sp002505495	culibigena
sp002503595	telefatio
sp003021045	divulitura
sp009742825	vocamigena
sp003021235	recoriforma
sp902511735	luticatica
sp902552015	dehonitas
sp002507245	rubigatica
sp9293u	buceletta
sp002506085	penicousia
sp013152995	divulago
sp011371765	lavacigena
sp003660495	dilecatio
sp008831545	solipitura
sp002496475	subinugo
sp902385635	peribitudo
sp902764455	cohorax
sp002825515	domicax
sp002686315	resalugo
sp002687735	conopax
sp013178285	pinificella
sp003136075	homolitoga
sp003650675	subofitoga
sp011375535	recumisca
sp002839545	bigemitio
sp902384795	locupiforma
sp902593945	calipitrix
sp003695745	peradisca
sp014361165	semipax
sp002709705	monacicula
sp902533295	dupunetta
sp013152685	xenopiforma
sp903835325	dehoniforma
sp002692465	denunimonas
sp002839675	ranunago
sp003096235	detenibra
sp011041895	defalitio
sp003021685	luculicella
sp900620265	dilecibra
sp013114715	luticitrix
sp012838205	gabinimonas
sp002719815	lucerimonas
sp902774685	decucitrix
sp011364305	navicifica
sp001469865	repagessa
sp002317795	depubessa
sp001443365	rutabivita
sp002688395	vepalago
sp902514095	vicecatio
sp011040545	fuligitura
sp002509495	dimidax
sp009778575	depupago
sp000746205	bifaritudo
sp002506745	tetenivita
sp002498315	cimitessa

## Sheet: 8,607 bac gen names applied
SAR324	Necopana
CG2-30-70-394	Colepana
WOR-3	Tiguraria
UBA10199	Domigosa
CG2-30-53-67	Cocibosa
UBA9089	Casigaria
CSP1-3	Minagia
DTU030	Defarosa
KSB1	Locupula
OLB16	Dehinana
RBG-13-66-14	Resulia
TA06	Nugacida
UBA6262	Semunula
UBP7	Metapana
SZUA-79	Semodana
CG03	Laxitana
UBP6	Bicinella
BMS3Abin14	Vecorana
UBA8481	Culilaria
RUG730	Foricaria
UBP4	Retecida
UBP13	Taxilella
FCPU426	Denecaria
4572-55	Lanifula
UBP17	Demulia
SpSt-956	Televaria
RBG-13-61-14	Volubia
J088	Musulosa
SZUA-182	Rinocana
SLNR01	Cinipana
CSSED10-310	Lenunida
SM23-31	Feditula
CAIJMQ01	Deforana
QNDG01	Decunula
UBP14	Nutamella
T1Sed10-126	Ceracana
AABM5-125-24	Desonella
DQWO01	Satacella
UBP7_A	Sonivana
FEN-1099	Cululosa
SpSt-1050	Levifella
TA06_A	Legifula
UBP15	Manubaria
DUMJ01	Cibarana
T1SED10-198M	Subadana
UBA2233	Funamana
GCA-001730085	Bifisia
ARS69	Ciminosa
CLD3	Defacida
UBP18	Futatida
JABDJQ01	Rubefida
SpSt-318	Nicotella
JACIXR01	Cululella
NPL-UPA2	Cohorana
UBA3054	Venunella
JABMQX01	Conipana
DSWW01	Semimosa
B130-G9	Bicoria
ABY1	Defunana
UBA4882	Lacinana
WWE3	Veridula
UBA2235	Nocumosa
D2-FULL-39-29	Lapilana
UBA10030	Vagabana
Ellin6529	Remedella
UBA9042	Rubigaria
AC1	Colutosa
UBA796	Melilana
GWC2-55-46	Tabifella
Koll11	Resalella
UBA9087	Monocella
UBA2968	Medimella
JS1	Homicia
SHA-98	Taxilida
CPR2_A	Sitelida
OXYB2-FULL-49-7	Cenodia
SM23-61	Forinosa
UBA1144	Conifella
UBA4055	Revecaria
UBA1384	Panifida
MSB-5A5	Loripella
UBA11872	Rosacida
Kazan-3B-28	Decitella
CPR3	Tolutella
UBA9942	Vivifida
MBNT15	Bipenula
CPR2	Defanosa
WOR-1	Detesana
GWE2-31-10	Tenemana
UBA1551	Disidaria
DTU065	Cerararia
UBA6911	Decomula
JAAXHH01	Cocodaria
WGA-4E	Democia
UBA8108	Decomaria
CG2-30-40-21	Nivomana
UBA1135	Didacella
O2-12-FULL-43-9	Colepida
UBA4738	Bisacosa
UBA727	Minurella
32-111	Gasifia
FAC87	Desurosa
GCA-002687715	Catobella
CAIWXX01	Denigella
GWA2-38-11	Ducilana
UBA2214	Renavosa
SLMV01	Revecida
HRBIN17	Baropana
UBA1414	Timefula
MVCY01	Bipenida
HRBIN16	Repagana
AB16	Tomogida
UBA2361	Recucia
UBA8468	Semodula
B26-G2	Fuligosa
GBS-1	Dehisana
DTU015	Cetaria
DG-26	Cacopella
UBA3569	Fuligana
UBA8919	Didacia
CAIYQO01	Nocumida
UBA6777	Peradosa
UBA6624	Denicida
UBA890	Tumefida
UBA2242	Semunella
UBA11346	Cisoraria
UBA9217	Volucosa
UBA8248	Turifosa
XYA12-FULL-58-9	Citiparia
UBA8742	Pavicida
2-12-FULL-62-27	Repurana
UBA5214	Diminida
PGYV01	Decinula
RBG-16-71-46	Sonabida
UBA4802	Curabana
SLGR01	Cerucia
UBA6919	Navifida
DTU084	Sonabella
Mor1	Ceracosa
PUPC01	Sitelia
BSN033	Debucella
UBA5377	Latibosa
UBA3072	Tomogosa
UBA9160	Buxifia
UBA1177	Caselida
UBA1439	Ridibella
4484-211	Delapella
UBA4092	Fidenaria
UBA3073	Morigosa
UBA5359	Mimogella
RBG-13-55-18	Salubia
TC1	Vitifaria
Palsa-1180	Detosella
UBA9980	Capucaria
4484-213	Cetararia
UBA5435	Bucolaria
SURF-5	Fecunula
B143-G9	Bacifaria
JACMRA01	Ficedosa
UBA6191	Rubefella
UBA994	Dehonella
E44-bin80	Remedana
UBA8477	Demogosa
B3-B38	Menapida
Ch29	Nitelia
UBA5301	Cululana
QYQD01	Detotula
UBA5829	Susicella
SOKK01	Cimelida
DTGP01	Viburella
UBA7883	Colimella
SYMT01	Bipenaria
UBA6077	Doxolaria
UBA6098	Vehemida
DTXE01	Cenobida
SZUA-567	Viripana
MHYJ01	Fetifosa
UBA2394	Xeroposa
UBA2428	Denavia
UBA5177	Divolella
JABMRZ01	Habacula
SORT01	Bigaria
UBA6266	Furibida
4484-113	Milipella
CG2-30-54-11	Tametana
J132	Purulana
B64-G9	Navifana
UBA12135	Bulapida
JAAYUW01	Desorana
DG-26_A	Bucelida
FW602-bin22	Colipula
JdFR-97	Desulida
B62-G9	Lenocella
SZUA-365	Bipinaria
JAADFL01	Rutabaria
DTLF01	Bipataria
UBA6099	Hirudula
RBG-16-64-22	Depupia
GCA-2792135	Depicaria
PUNC01	Sanabida
DTPJ01	Colimana
2-12-FULL-45-22	Risibana
JAAXVQ01	Cosidida
UBA7526	Mirabula
JABDET01	Detorida
UBA4820	Nefarida
J058	Siticia
B3-LCP	Lavacosa
JABMPQ01	Dehonosa
YA12-FULL-61-11	Pepenella
SICC01	Denupana
SURF-26	Colipia
DUMD01	Sonivella
SDB-A	Menapella
UBA9088	Gemebosa
RPQS01	Saxifida
SBBH01	Hexagella
JABWAT01	Tabitana
GCA-2686955	Desuposa
UBA10988	Resalula
WYAZ01	Cilotula
DG-23	Rorulosa
DTOL01	Cacopia
BMS3BBIN04	Buxanosa
UBA4733	Vecorula
E44-bin39	Catagana
HRBIN11	Siminia
B129-G9	Homunaria
SURF-8	Loriparia
PCC-6307	Vehemella
PS1	Virecosa
SAR86	Ludimula
RFP12	Capudana
SG8-24	Labecella
UBA9983_A	Ficedana
HK1	Rumifia
RFN20	Cerofella
UBA101185	Decenia
UBA1400	Bucolula
UBA3495	Bicipella
UBA12225	Dehonana
BM507	Bucolosa
UBA9655	Fatilella
GWA2-44-7	Notacella
JGIOTU-2	Bimetana
HIMB59	Peridaria
UBA1161	Haricia
UBA10092	Monimella
2-02-FULL-40-12	Repagaria
CSP1-4	Hecatia
UBA9936	Subodana
WO2-41-13	Refularia
CAIUCS01	Solifella
SC72	Bipenella
UBA4486	Facunula
NS11-12g	Peropana
Rs-D84	Delapia
UBA8366	Decenella
Ga0077560	Cadurella
UBA1558	Nugivella
UBA9629	Dilogosa
Bin61	Sugilida
WVZY01	Lavacula
SAR202	Defulida
UBA9649	Depetaria
UBA5794	Rudicella
UBA10105	Lupanella
UBA9983	Letifosa
UBA6257	Denomula
SJA-28	Panopida
RF32	Resacula
UBA1544	Defarana
SBR1031	Nocumella
UBA10029	Solifida
CG1-02-43-210	Lutulosa
UBA2241	Visocaria
UBA1151	Carucella
AKYH767	Satacosa
UBA8260	Visibia
UBA12405	Desurella
UBA5066	Tenebosa
UBA1406	Molecana
SB-45	Nidifida
UBA4975	Saxopella
BD1-5	Fusifella
UBA4971	Citocaria
CG2-30-33-46	Casigia
GWF2-39-127	Defacula
PCC-7336	Peradella
UBA8473	Modifida
RKRQ01	Perexula
GWA2-46-9	Democaria
B1SED10-174	Nosocosa
UBA920	Denicosa
Bin125	Dilogula
UBA2258	Homulosa
CAIWAD01	Lucerana
GWA2-35-9	Fidenella
Palsa-1104	Hirunaria
UBA10015	Ratifella
SPLOWO2-01-44-7	Celamaria
CAIYYT01	Perexida
GIF10	Decamella
MPNO01	Meridella
IMCC26256	Rosarella
UBA10190	Vinolida
HDB-SIOI813	Luculosa
DTUO25	Buxifaria
UBA10575	Valefula
UBA7887	Demularia
2-02-FULL-39-11	Venefia
UBA7541	Dilicella
UBA5335	Verifosa
DTU022	Depelida
DTU010	Ducilida
UBA11654	Refacia
UBA2591	Peribosa
P2-11E	Curotosa
Bac17	Malagaria
O2-12-FULL-45-9	Fuligaria
UBA8231	Cicatosa
WTBG01	Depasida
T3Sed10-11	Perabida
Bin65	Manubula
SLAD01	Revecula
GIF9	Dedigia
CAIXZC01	Murelaria
Palsa-1439	Bipalana
UBA12157	Maledosa
TANB77	Dupunia
GWC2-36-17	Turicaria
UBA6186	Lanigana
PWYM01	Cisalella
UBA5704	Holovida
DTJE01	Bucelula
UBA7879	Gabinosa
UBA1018	Desoraria
KS3-K002	Reforella
UBA1407	Semilida
UBA2196	Totidula
CAINFC01	Repepula
UBA8558	Papilula
UBA1369	Malogia
CAJBMM01	Resupia
ATCC43930	Legifosa
UBA1146	Vigenana
LD1-PB3	Delacaria
CAIUEV01	Luculella
GWA2-43-13	Telegaria
CF-121	Halucula
TMED127	Tubicaria
UBA1565	Papilia
GCF-002020875	Valefaria
CG2-30-59-28	Verecella
2-02-FULL-40-11	Favilella
XYC2-FULL-46-14	Domipida
RF39	Defenosa
UBA2979	Sacopula
UBA2991	Letifaria
UBA1149	Recucula
UBA4151	Hexaposa
AKYH767-A	Lenunana
UBA1280	Redacaria
SCGC-AAA003-L08	Redacia
UBA2466	Feditosa
2-02-FULL-50-16	Salubana
UBA10025	Detepida
UBA7950	Feficosa
2-02-FULL-39-32	Tirocana
CADAEX01	Manibosa
LZORAL124-64-63	Vinolella
VMEV01	Subodida
UBA6615	Fumifaria
GCA-2716485	Resurula
UBA9570	Pecunella
UBA2169	Curacosa
UBA6126	Bigemia
CG1-02-37-114	Videlula
UBA4473	Depocosa
UBA1560	Vacilella
UBA1572	Celumana
UBA2963	Nimirella
ML615J-28	Monopida
UBA2774	Siligia
DTU014	Nugivida
TMED109	Nubifaria
JdFR-76	Malogida
CAIRSR01	Cucurosa
CAISUE01	Pinigana
B4-G1	Colubula
UBA3567	Bugilella
4484-171	Homolia
UBA8317	Tubicosa
DSGV01	Sicubida
SM23-28-2	Hecatosa
UBA6902	Monodosa
B68-G9	Patibella
2-12-FULL-50-11	Defunella
SKNC01	Rudicia
CAIQBE01	Feditella
CAIKKV01	Defacana
GCA-002705445	Nubifana
XJ16	Catilana
UBA7916	Venunia
XYB2-FULL-38-15	Tabifula
UBA12157_A	Nocumia
Palsa-1295	Solifula
SXXA01	Cisalana
DRI-13	Latibella
CR04bin15	Cinefosa
XYD2-FULL-50-16	Nicomella
DSM-22653	Beneparia
DSLN01	Recogosa
D8A-2	Dinupia
RKRP01	Locupia
UBA7694	Bicorida
HR10	Desuparia
DTRM01	Decinia
JABCZS01	Curabaria
UBA1062	Hexaparia
CAILMK01	Dicimosa
21-64-14	Baditana
SM1-40	Relenosa
REDH01	Debucaria
Ch128b	Megalella
GWF2-35-9	Refulia
UBA1845	Cacomaria
UBA7985	Semifaria
UBA2966	Dinuposa
WVXT01	Documaria
UBA2985	Terebana
WVXJ01	Repecula
UBA3088	Culibula
UBA4664	Vehicida
2-02-FULL-44-16	Duponaria
UBA8416	Depupella
UBA2386	Fetifula
UBA7662	Manubana
SLRQ01	Genufia
RBG-16-64-13	Demulula
UBA4142	Cenobella
Ga0077536	Delebida
SpSt-223	Catalida
UM-FILTER-40-11	Fatifella
UBA3561	Meridosa
UBA6595	Derelia
OPB41	Cenodana
UBA1429	Depacida
SpSt-205	Tirunia
BM002	Defetia
UBA1212	Fatifosa
UBA6522	Rudecaria
CG2-30-40-12	Satacaria
UBA2201	Voragida
SpSt-225	Bicinaria
PWKZ01	Totidia
CG1-02-64-396	Relapula
SLOV01	Medimula
UBA11705	Relenana
DSM-100275	Dicabella
DRLW01	Forinella
UBA6215	Remulella
UM-FILTER-39-15	Derunella
CADAWZ01	Bisularia
UBA4575	Paracia
20CM-2-55-15	Viriparia
UBA3505	Latibia
VBWC01	Hibisella
GCA-002720895	Desomaria
SBBC01	Pinacella
DSM-16500	Monopella
WQYP01	Diludida
UBA2392	Pimenida
UBA2777	Horomana
JdFR-54	Subodella
DRYD01	Luculida
SZUA-146	Solacula
WRKU01	Volubella
JABDMI01	Resulula
Ch115	Vituposa
GCA-2729495	Demulida
UBA10183	Domicosa
UBA12402	Pimenosa
UBA6184	Metabida
SZUA-252	Celamana
PCC-9006	Rosacosa
UBA9968	Casigosa
GN15	Solacida
GWB1-36-13	Seposana
C00003060	Colubida
WRBN01	Repurella
Gp22-AA2	Dilibosa
S15B-MN24	Recumaria
UBA2247	Calipella
CAIMUX01	Caravula
DTU080	Defosella
SLMS01	Catalia
UBA3575	Vinolaria
UBA10806	Rosararia
CAILAD01	Bigemosa
SMYD01	Dicibula
HRBIN30	Repecosa
UBA8890	Sacoparia
SM23-42	Labecia
AC-67	Viripula
2-02-FULL-35-15	Coloparia
LBFQ01	Bigemella
DTPP01	Malogosa
16-39-46	Lacularia
B13-G15	Panifia
UTPRO1	Fetulida
UBA1560_A	Fetutula
2-12-FULL-37-12	Sifunosa
MWEM01	Resacella
VXMN01	Calipula
B70-G9	Retunia
RUG11792	Desepula
DTU086	Defosida
GCA-2731375	Vitupula
LLD-282	Viginaria
DTU087	Holovosa
UBA6952	Baditaria
GCA-001788215	Vocifosa
UMGS1810	Dehonaria
JdFR-78	Dilibana
SM23-33	Megalana
DUPQ01	Fidenana
SLND01	Venefosa
UBA9615	Semifia
JAACEG01	Colipella
UBA4068	Divulosa
SZUA-336	Tomacia
JAAZAB01	Deforosa
UBA817	Calipida
VXPW01	Conubana
Ga0077536_A	Cosigia
UBA11236	Fetifana
UBA7540	Maxumaria
B3-TA06	Repeparia
CAISDR01	Solipia
UBA828	Hegumosa
CAIPTA01	Cocibia
UBA4248	Sicarula
CAILIB01	Lametaria
UBA6729	Fefelula
GCF-013343005	Selecida
UBA1113	Cemenella
SpSt-600	Citivula
2-01-FULL-39-13	Domicula
J040	Detoraria
UBA1398	Cucuraria
UBA1127	Nivomella
UBA7976	Domabana
UBA1063	Homicosa
UBA2766	Femelaria
CACIAM-69d	Ciniparia
HTCC5015	Semigana
SZUA-161	Corocosa
UBA12015	Negotaria
QHBO01	Venefaria
PEYW01	Desomella
RBC074	Tirunana
DSUN01	Cimitella
SZUA-140	Curotia
UCB3	Derunosa
2-12-FULL-49-11	Categana
B142	Lapilula
JC444	Decataria
UBA11073	Vehemia
GCA-2717565	Conarosa
Fen-336	Biparia
Gp7-AA8	Viburana
GCA-2687025	Dicimaria
JABDDW01	Dilecula
HGM11514	Bimetella
UBA9339	Fetutana
UBA4821	Dupunella
F11	Cenodosa
JABMRG01	Fuligida
4572-78	Bovicida
UBA995	Relecaria
JAAYUI01	Cohorella
ZOR0006	Megalula
PHBI01	Coleparia
SZUA-21	Cinipula
UBA11222	Malagosa
JAAYKD01	Dimacaria
XYA2-FULL-43-10	Denavula
UBA6926	Paropula
CADDZG01	Curacana
DRWM01	Vicatella
JABMSA01	Rurigosa
0-14-0-20-40-13	Navicana
RBG-13-44-9	Demogia
RUG12999	Feditida
B21-G9	Hexagida
GCA-001735895	Siticana
UBA2200	Homunula
FEN-1346	Gerunida
WRAU01	Lametosa
SPDA01	Semimella
GCA-2863065	Cimitosa
JAAYSF01	Cerucella
UBA6002	Solipana
UBA3830	Parocella
DRVO01	Momoraria
CAIUPP01	Fetulia
SZUA-6	Volucana
J057	Desepia
JAACET01	Vitabia
UMGS1260	Deparida
SURF-38	Dimacella
UBA1875	Tubicida
UBA8346	Decenosa
MWAK01	Selibosa
UBA8416_A	Lorarida
UBA7966	Tegimosa
JABDJR01	Categula
SHVP01	Lubenaria
UM-FILTER-42-10	Pecunida
DUMP01	Vacilia
UBA7702	Devecia
JAADGY01	Solivella
UM-FILTER-43-11	Ruricaria
MnTg04	Semigia
SHYB01	Bucelosa
JAAXGF01	Coloposa
DTHP01	Patibia
DSPP01	Nugacana
9FT-COMBO-53-11	Nocenella
AABM5-25-91	Filifida
SK-Y3	Legifana
1604HC	Casigana
RGZZ01	Biveria
SBBL01	Cerarida
FW602-bin16	Tibicosa
GCA-2746535	Vacilosa
Bin18	Beneposa
JABSOH01	Nefarosa
UBA5070	Negidida
RP-AC37	Subofula
UMGS1883	Defasia
DULZ01	Lucelella
JAAZEB01	Gasifula
NDHX01	Coliposa
B22-G15	Repuria
CAIXNZ01	Sicararia
SZUA-229	Carunana
JABMRJ01	Biparida
UBA7656	Funamia
HGW-17	Curacella
UBA8153	Detosida
JAAYHZ01	Nugigella
B26-G9	Tirocaria
UBA2562	Maligaria
4484-93	Caselosa
DUMW01	Humecula
UBA2199	Capucosa
DSWA01	Rudecana
PFEM01	Siligula
WRCU01	Bifarosa
UBA7937	Relenia
UBA1444	Noninella
RBG-13-43-22	Cinefana
UBA9673	Dimacana
UBA12178	Defulia
JACIZP01	Telegella
DSM-16000	Homolula
SMXQ01	Momorella
E26-bin7	Penecaria
CAIRYL01	Denigana
J045	Direcula
CADDZV01	Tabifida
SHNJ01	Penecula
SP197	Podagula
J025	Hegumida
SZUA-149	Casabella
SRT547	Sarabosa
DUEN01	Tumefana
JABMQE01	Bimotaria
DTJY01	Pacifida
JAAZLZ01	Hirunella
MWCT01	Nugigia
QNBC01	Dimadaria
GCA-002796325	Taraxana
PWPR01	Menapula
PH28-bin88	Depoposa
UBA2565	Loriposa
B48-G9	Celamella
PWVN01	Famelula
B11-G9	Visibella
DSTF01	Cinefia
JABWCM01	Satacida
VXOZ01	Dececana
SS1-B-03-39	Nutamida
Ch66	Cucurella
JAAYEA01	Patibida
RZYC01	Virecella
CAIVPW01	Nosocida
2-02-FULL-51-18	Cenodula
Pan216	Decupula
UBA2400	Selecia
JAADGH01	Semodida
Fen-727	Homicaria
SM23-32	Rarefula
UBA5859	Delubana
JAABTG01	Semimula
SM23-81	Herinaria
B21-G16	Doxolana
SMXP01	Ludifosa
SHVT01	Detosaria
CG2-30-64-16	Redacida
UMGS1840	Sicubula
SHVW01	Locupida
UBA7366	Pinacaria
SZUA-242	Cocibula
SPJN01	Lucelaria
MWCZ01	Buxanana
JABDGN01	Modifosa
QNFE01	Rubicula
54-19	Curacida
JACIYH01	Sacoposa
Bin95	Vepalaria
HP12	Derecaria
SHVZ01	Sitelula
JAAYXC01	Homogaria
JABEVK01	Defularia
DTEH01	Divolida
JABWAM01	Maledula
SpSt-1174	Conarula
GCA-2400775	Conipula
DSM-16054	Humecana
DTQI01	Maxilosa
B15-G4	Maledana
SHVR01	Cenotosa
9FT-COMBO-42-15	Cerimaria
JACMPN01	Depicida
UBA8921	Tabitia
GCA-2747255	Decacosa
SW-4-49-11	Catagida
WVWN01	Dapifana
DTKO01	Celumaria
SMXS01	Dececosa
1-14-0-20-42-13	Cimelella
DG-27	Laculosa
VFKW01	Genocula
AqS2	Tibicula
2-12-FULL-54-10	Habacosa
J002	Monimida
RBG-16-55-9	Vicecosa
DUMF01	Verifida
BM003	Tirocella
SHYD01	Manomia
MVZB01	Defalaria
SpSt-313	Cicilida
GCA-2401425	Nivomosa
J113	Televosa
J044	Ludibella
DSSB01	Munifida
PCC-7407	Pabilella
UM-FILTER-49-7	Venunana
WSZJ01	Cadurosa
2-01-FULL-47-10	Codifana
J103	Decitosa
JACDCP01	Fumacella
JAADGQ01	Malagia
JAAYCJ01	Denixula
B119-G9	Culibida
DTIG01	Mahelula
SKZP01	Cosidaria
UBA11029	Pavicana
DRWO01	Vilitula
WLWR01	Domigula
JAAYUB01	Lanugella
SURF-12	Futataria
0-14-0-10-38-17	Pinacida
BMS3ABIN01	Negidaria
JABMQR01	Diponia
OLB7	Viginida
2-02-FULL-49-11	Ludimaria
ATN3	Virecaria
JAAYZQ01	Rubefia
WTKD01	Funivella
DTGQ01	Penecella
GCA-2746255	Capabula
PIVX01	Senacella
PHAN01	Vavasida
2-01-FULL-59-12	Denixida
UBA11136	Sotulula
DRLM01	Habacaria
AKS1	Manubosa
JACCYY01	Lanigella
GCA-2701885	Duricella
JAADFJ01	Gasomula
JACCXJ01	Viliparia
0-14-0-80-59-12	Velifia
DSM-26407	Defesida
4484-107	Cilotia
UBA8349	Turilaria
JABMQH01	Defosaria
UBA1874	Melilida
DY22613	Saburida
SHWA01	Benivida
QZLD01	Tenemia
ARS1246	Cocodia
Ga0077554	Monogosa
SCPX01	Pacifaria
GCA-2747355	Luxurella
SBBB01	Bifisida
CACIAM-22H2	Lucelosa
J063	Solivana
SHXV01	Detotida
PLA2	Catilida
B28-G17	Regifosa
MAG-NZ	Homagida
B3-G13	Bonitana
UBA3071	Codifella
GM7ARS4	Cacomella
DUSP01	Cunabaria
JAAYKL01	Bisulella
WRLR01	Depecaria
SB21	Fumifia
DTLL01	Pabilaria
SHVV01	Locelana
JACCXV01	Dilogida
JABLXB01	Periposa
DTKB01	Dicimia
Plut-88900	Manibana
Bin98	Papilida
MC1	Levidia
JACCUZ01	Nugacosa
UBA2770	Detenella
CAISOG01	Catobana
SURF-47	Viragula
43-37	Lupanida
SAR202-VII-2	Seniparia
JACAEB01	Senipia
CACEW01	Totidaria
SURF-13	Decapula
AqS3	Luxurula
CACJXQ01	Hecatida
DTKN01	Sonipana
PIWD01	Secunaria
NMUJ01	Refulosa
DT-59	Deparella
QNFN01	Nimirosa
1-14-2-50-48-13	Subabaria
WHTO01	Lucelia
JAADHS01	Socagia
B21-G15	Repurosa
UM-FILTER-46-8	Pulegosa
JABSQK01	Velifida
4484-49	Hemitaria
SICM01	Rutabana
JABWBI01	Fetutosa
1-14-0-20-64-10	Cibararia
GWA2-38-13b	Telefana
CADEGL01	Decamaria
GWA2-58-10	Bucelella
SLPQ01	Subacosa
DSUL01	Visocosa
DTNB01	Maxilia
JACNKJ01	Cicaria
RBG-16-42-10	Monumula
SHYM01	Licenula
E44-bin18	Refocella
02-12-FULL-59-9	Pudibana
DTOW01	Celamula
QHYA01	Vocamana
JABABF01	Maledida
Hat2	Demagana
JABDLF01	Capilida
RPQK01	Milifosa
UBA932	Cenobana
S36-B12	Categida
RAAP-2	Buxifana
Bog-793	Semibida
D2472	Bisulosa
GWC2-37-73	Camilaria
DSM-1321	Fumacana
FEN-979	Pedeparia
EnvOPS12	Vinolia
P3	Halucosa
CAG-74	Subabosa
UBA1067	Solacella
AG-339-G14	Seposaria
UBA953	Capucana
UBA9934	Nugivana
UBA9973	Relaposa
Bin80	Revecana
UBA11358	Locelia
CAG-826	Pudibella
UBA1222	Resacida
TK06	Redacula
UBA10185	Musulella
CG1-02-47-37	Desurida
SG8-41	Diludana
UBA2588	Venefella
GWA2-41-24	Solacaria
GWA1-40-21	Carunaria
PALSA-1337	Colutula
CAIOVX01	Relapida
UBA8401	Rurigella
UBA1997	Decapia
CAG-138	Selecella
TMED2	Noninula
TMED112	Lucelida
UBA11393	Fatifana
UBA5453	Dapifosa
UBA12465	Manomosa
UBA8517	Xenoposa
Bin134	Monacana
GWA2-44-9	Benivia
SM1A02	Cenacia
UBA10102	Maxilida
UBA10138	Redacella
UBA10416	Nocenida
CAISPN01	Bicipia
F082	Subadia
GBS-DC	Tenebia
UBA9464	Vatilaria
2-01-FULL-45-33	Tametella
UBA12075	Lenocia
UBA9935	Xeramosa
NAC60-12	Peripida
SZUA-534	Tomogaria
UBA868	Bimotana
F1-60-MAGs149	Bisulana
UBA12108	Ranunida
UBA12049	Catecaria
UBA6960	Caravida
UBA5738	Subodia
EtOH8	Cepurana
WCHB1-69	Turibosa
UBA840	Hemidana
UBA955	Subadida
SXON01	Capucella
UBA4665	Meridida
GCA-2696645	Nubecida
UBA8139	Recocella
UBA1539	Xeramella
UBA12059	Rubicana
UBA11712	Faticaria
UBA10009	Dicibella
Fen-1087	Tenemosa
UBA1402	Dicimida
DSM-18226	Robigida
UBA1172	Demigida
UBA9637	Cibarula
UBA1381	Melilosa
UBA12079	Herinana
CAIJYI01	Cacomosa
UBA826	Nugivaria
UBA11606	Munifana
RS24	Venucia
Bin76	Cuferana
UBA6906	Culibella
UBA1546	Denecella
UBA1568	Bicalula
UBA927	Casigella
UBA10151	Sugilia
UBA9933	Capilana
OLB5	Virecida
GWC2-71-9	Relenula
VadinHA17	Categaria
UBA8932	Duponosa
CAG-977	Benemaria
A4b	Telegia
UBA2163	Legifaria
UBA3663	Tomacana
UBA4765	Rumifula
AG-422-B15	Mirifosa
DSM-45221	Celamia
AAA164-E04	Recomosa
CAIZLB01	Bicaparia
CAJBBX01	Senipana
CAG-917	Dimadana
UBA5680	Decupana
TMED-70	Bipinana
UBA3015	Terebaria
MFAQ01	Notabula
2-12-FULL-35-15	Bimetia
MedAcidi-G1	Funamida
GWC2-37-13	Vigenida
UBA1268	Subinella
GWA2-36-10	Mutabia
UBA2798	Patibosa
34-128	Tumefosa
UBA5976	Divulella
GWA2-47-10b	Bipatana
UBA2023	Visifosa
XYA2-FULL-47-53	Defalida
ML635J-15	Carucaria
HTCC2089	Tegumosa
UBA4408	Vavasana
GWA2-73-35	Fibicia
XYB2-FULL-49-35	Depelula
UBA2337	Panopella
TMED25	Citipia
JA-3-3Ab	Divolaria
UBA9959	Reduvida
UBA1609	Pomifana
PJMF01	Vepalula
CAIOMD01	Denupula
2-01-FULL-46-14	Cocolula
Nap2-2B	Relenaria
UBA10450	Cuticaria
SM23-35	Peridula
SG8-39	Siminosa
MB11C04	Detumia
CAIPLT01	Hirudaria
CAIKAW01	Cadavia
GWF2-40-263	Fetifida
UBA922	Cilibida
CG2-30-39-44	Femelula
GWA2-38-27	Citivia
TCS55	Manufida
UBA1096	Defania
Fen-1088	Mimogana
O2-02-FULL-48-8	Susicaria
Palsa-948	Seposia
GCA-002753745	Rosacula
70-9	Foricia
CAIKAF01	Denomaria
GWB1-50-10	Venefula
UBA11138	Resupella
UBA12090	Subabella
UBA8958	Malogula
UBA11359_A	Novilia
SM23-39	Levifia
DTU083	Petulella
Casp-alpha2	Noninida
PALSA-555	Pocilula
UBA11713	Semidia
SG8-4	Dicabida
UBA2359	Negotosa
GWA1-39-11	Tumefella
B-17BO	Demogaria
DTU025	Benemana
S15-B10	Minagula
UBA3065	Cepurosa
UA16	Vatilosa
VXNJ01	Refocaria
GWF2-35-18	Murilella
UBA7960	Detotosa
UBA9988	Vigenia
UBA2206	Colimula
CAIMTB01	Manufaria
GWA2-47-26	Tametida
UBA1390	Dicibia
CAG-239	Catobosa
HO2-37-13b	Semifida
UBA6821	Retecaria
SZUA-36	Rorulella
CG1-02-43-26	Forinana
GWB1-42-6	Biverida
UBA2999	Lucifana
UBA11359_C	Mavorella
CAG-288	Xeropella
UBA6264	Curotula
CAIKLP01	Rubecella
RUG350	Hexapula
BMS3Bbin11	Redunosa
Kpj58rc	Nefanella
UBA816	Coturana
SKZT01	Forabaria
Fen-1064	Benifida
UBA2128	Doxolida
XYB2-FULL-48-7	Tomogia
PUMT01	Lucifida
CAIRTM01	Socagula
UBA1820	Senacida
Bin34	Dilemaria
CAIOGM01	Repagida
Bin127	Lucelana
PHOS-HE28	Devecosa
Bog-877	Culigosa
CAIYMF01	Mirifida
UBA5619	Semimana
AB-539-J10	Nubigida
CAITUV01	Locupana
CAIODY01	Figilana
SG8-38	Benivosa
CAIQCK01	Funebella
UBA5633	Carecosa
NICIL-2	Nubifella
UBA1829	Cenodida
UBA8154	Depubia
UBA12327	Denoria
CAG-508	Fidenida
T1SED10-28	Fatilida
CAG-1252	Lenunula
UBA8639	Locelida
QQVD01	Cululida
UBA5518	Genocia
LD1	Vepalida
UBA7805	Ficularia
UBA12077	Tenemula
UBA5542	Favilida
UBA12409	Demulana
UKL13-3	Nefanana
DSM-8532	Catabida
2-02-FULL-50-16-A	Funebia
PWMO01	Bonifosa
CAJBMK01	Celumosa
JABDQB01	Denomosa
2013Ark19i	Coturida
UBA10165	Sotulana
GWA2-42-15	Monodida
UBA9662	Celumula
DTU049	Domipana
UBA8190	Telegosa
TTA-H9	Pinigia
SXTU01	Hirunida
UBA961	Citipella
UBA12470	Penuraria
UBA12028	Semimida
CAIQIC01	Semibella
CAITNO01	Fatilula
CAIKXV01	Recucaria
40CM-4-68-19	Venucella
UBA644	Bifisana
UBA2143	Hecatula
GCA-002686595	Domabosa
GWA2-42-14	Conamula
XYC2-FULL-37-10	Fumacaria
HRBIN12	Navifella
UBA660	Vitigella
GCA-900066905	Lacinosa
CG1-02-41-26	Baditosa
SCN-69-37	Democula
UBA823	Metapia
WLNW01	Hemitia
2013-40CM-41-45	Vocifella
SpSt-165	Medimaria
UBA6503	Letifula
UBA9506	Coturella
D37C17	Subinia
OLB10	Vehicia
UBA5603	Divulula
CAIXZF01	Depasosa
SZUA-232	Vicecia
GCA-2862545	Tolutana
UBA2156	Conigana
BACL11	Duricida
SLAA01	Dilicida
SHLN01	Ducilaria
CAG-312	Homolaria
UBA9294	Semodosa
UBA917	Desuria
UBA7434	Rosacana
TMED26	Repeposa
Palsa-688	Deseparia
UBA8592	Pepenida
BMS3Bbin05	Catalula
GWF2-33-38	Mimogia
SKNL01	Dehinula
UBA8438	Citiposa
SXQI01	Catapula
SLST01	Cobalana
UBA9219	Luticida
GCA-002719695	Buxifosa
HO2-48-17	Bicubaria
CAINMV01	Catafella
UBA2165	Colubana
CAG-314	Cohuraria
UBA1559	Manufia
UBA1100	Turilana
2-01-FULL-45-10	Buxanula
JABDAW01	Lorarella
SKOM01	Resalia
UBA9337-A	Dilecosa
PWKH01	Cimelosa
T3Sed10-336	Depuparia
UBA998	Levifaria
HO2-52-23	Vanitella
UBA4778	Biverosa
GCA-002785045	Curabia
CAG-698	Satacia
CAIZMI01	Sicinula
CSP1-2	Deteposa
UBA8199	Tabitida
AAA536-G10	Depicosa
CAG-313	Caliposa
DTU052	Monogula
DTU023	Decunaria
GCA-002795985	Cilotella
GCA-002782225	Revecia
2-12-FULL-44-17	Sonivula
UBA923	Vanitida
B-1AR	Genufosa
GWF2-35-48	Reduvosa
UBA12411	Papilella
UBA5629	Denecia
2-12-FULL-40-28	Sugilosa
GWF2-33-10	Cuticosa
4484-219	Velivula
UBA2268	Linigia
JdFR-88	Bipinella
Verruco-01	Vitigida
PXBQ01	Sifunaria
UBA2364	Colutida
UM-FILTER-36-11	Derecia
UBA6940	Conamaria
ATM1	Pavimida
DTU012	Homolella
NGM72-4	Depubula
B32-G15	Repudula
SM1-73	Depecosa
UBA11657	Dibapula
UBA6249	Refacosa
DEV007	Voragosa
AWTP1-31	Cohurella
XYB1-36-10	Defulosa
WLWN01	Gasomana
JAAYNR01	Vigenaria
CG2-30-49-12	Desucia
XYC2-FULL-47-12	Defacella
2-12-FULL-60-25	Nugigula
CG1-02-40-25	Dececella
UBA4744	Rinocula
UBA12454	Halucella
HRbin24	Defanula
GCA-002780085	Cuticana
GCA-002718135	Defulula
SLSP01	Decamosa
UBA10003	Derelosa
GWF2-50-93	Decacula
M10-OD1-4	Rorifida
UBA3031	Catabella
CAG-272	Coliparia
PXAI01	Lapicella
CAIWKO01	Resacana
DTU029	Desacana
CAIJXV01	Modifaria
UBA6539	Rubecaria
46-47	Fatilaria
AcAMD-5	Mimogosa
UBA12473	Sarabana
UBA6594	Capucia
UBA2363	Solacana
UBA4877	Lorarana
CAIXSY01	Benemida
HR35	Nefanosa
GCA-002773005	Feculana
XYC2-FULL-38-9	Viripida
UBA5745	Feficella
2-02-FULL-50-9b	Desuraria
HRBIN32	Valefia
CAG-274	Negotula
79-D21	Derecella
D2	Vicatosa
GCA-2721815	Defanaria
UBA2136	Dicibana
UBA1611	Tenilaria
CG2-30-66-41	Curacia
GCA-2709665	Coninula
UM-FILTER-41-14	Corocida
SKKC01	Papavosa
PWNQ01	Sotulia
SLCJ01	Pomifella
UBA2162	Nubifosa
Ga0077529	Nitelaria
VMGT01	Fumifula
HRBIN36	Homulula
SLHB01	Telegula
BMS3Bbin08	Megalia
Fen-1342	Docibaria
F1-12-MAGs170	Cilicida
DTU072	Vicecaria
PALSA-610	Direpella
LS-SOB	Repecia
ZC4RG35	Totidosa
GWA2-37-8	Nosocaria
BBW3	Peribia
UBA9628	Recoraria
PP17-6a	Vivifosa
PWPS01	Lacinida
54-24	Vagabula
SPGG2	Pepenana
YA12-FULL-60-10	Peradana
UBA10066	Favonella
QALW01	Lanugaria
2-02-FULL-67-57	Cucurula
UBA12481	Futatula
2-02-FULL-58-16	Denicella
CSBR16-193	Dimidosa
SLHW01	Herinosa
Palsa-965	Diponana
CAG-552	Sanabia
RGVZ01	Conopula
CG2-30-43-20	Lugubida
SURF-3	Cetarula
CAITUY01	Dupunosa
WGA-3G	Funebosa
GWF2-38-335	Cosigaria
UBA8649	Feficida
SLCP01	Depasaria
PUMD01	Reforaria
UBA9337	Tirocida
UBA11471	Gasifana
VXLM01	Pinifosa
UBA6623	Medimosa
UBA1255	Butubaria
Gp1-AA112	Bicipana
GWA2-32-17	Domigida
UBA2962	Dimidella
UBA3636	Cepulia
GWC2-33-13	Lucularia
QEVD01	Tomogella
DUEL01	Dececia
QAMX01	Depubida
JACNGX01	Depubosa
UBA11063	Casigida
UBA11579	Mirabosa
01-FULL-45-10b	Semipida
UBA2185	Bisacella
UBA2279	Depecia
UBA2210	Haricana
J102	Deparosa
PUNB01	Desepella
Fen-181	Divorella
UBA1412	Sicunaria
UBA11386	Feficaria
UBA11717	Desomana
2-12-FULL-66-21	Secunida
PEXW01	Benifia
CAITYL01	Podagosa
PWGO01	Xenodia
VXPQ01	Calipia
PETJ01	Pepenula
UBA4181	Negidia
JAAZCA01	Colapula
UBA1431	Saxifana
UBA10110	Pacifosa
UBA12508	Dinupula
GCA-002787255	Bimotosa
UBA5272	Deforaria
Palsa-1400	Secunula
QAMH01	Decunia
CAG-631	Lavabia
4484-276	Bicubosa
2-01-FULL-58-14	Bicodida
RKSH01	Palifula
BICA1-8	Novilosa
UBA4823	Habacida
RBG-16-60-22	Volunida
RBG-13-53-26	Reforida
XYD1-FULL-46-19	Disidella
GCA-2716585	Repepia
V1-33	Munifula
GWF2-57-35	Reduvana
WQUG01	Vicecida
CAG-449	Resacaria
PWLI01	Colapida
TMED131	Citocula
HGW-15	Dapifula
BACL12	Catecella
Palsa-1178	Cicilella
J036	Depetana
UBA8910	Monogia
UBA1242	Macilula
UBA4085	Tomacella
UTPLA1	Maxumida
CAIYWZ01	Sitelosa
UBA10146	Nubecia
UB4802	Penicaria
UBA2964	Manibida
J093	Nitelosa
BM103	Defetella
CAIMNF01	Viripia
DRMV01	Didacana
UBA12420	Tibicia
AK92	Dapifida
PGXB01	Munimida
DTU073	Taraxida
UBA2995	Demagida
JACABE01	Subacana
UBA9320	Lapilaria
QAND01	Dinupana
RUG844	Sicunia
DSYL01	Minurana
2-12-FULL-57-11	Sacomana
GWB1-40-14	Hexapida
UBA10212	Categia
1-14-0-20-45-26	Bipatia
UBA4093	Malagula
UBA12463	Tabitosa
UBA8530	Ruricula
UBA1163	Diponida
CAG-465	Televia
RSA5	Bipinosa
WLXD01	Cimitida
RBG-16-64-32	Dedigella
UBA8363	Conopida
UBA6899	Conubula
C00003106	Noninaria
UBA5352	Cotenia
SLQV01	Podagella
CAIQNR01	Cisalaria
UBA6807	Monimosa
RBG-1	Morigella
AG-410-N11	Papilaria
CA54	Semipana
UBA2135	Tabifia
CAIMVM01	Fefelaria
UBA12170	Diritosa
CAIYGI01	Dicibida
GCA-002707645	Conipia
DTNQ01	Bimetula
TCS61	Timefella
CAG-382	Doxolula
UBA6927	Fiducaria
UBA8229	Lapilella
Fen-1058	Fatifaria
UBA5852	Forabida
UBA4427	Relapia
GCA-002748415	Cocibida
2-01-FULL-39-33	Dibapia
Ga0077539	Musulia
CAIVKH01	Relapana
UBA8898	Derunana
UBA10428	Letifella
UKL13-2	Diponella
UBA2987	Lutularia
WCHB1-27	Cinefella
CSSed11-197	Retecella
QNYZ01	Vanidaria
2-02-FULL-66-22	Pulegia
SXIK01	Bovicosa
LV9	Doxolia
UBA6935	Sicunosa
X112	Saxifaria
N074bin48	Legifida
WO2-44-18	Vinacella
UBA1977	Bifarella
UBA1433	Vatilana
DSFT01	Sanabosa
TMED6	Ruricella
UBA1006	Nehalula
H02-43-30	Refacida
GCA-002779355	Pocilella
JACIWP01	Bonifida
UMGS124	Recocana
CAFBRK01	Gemebaria
GCA-002716945	Verecida
UBA3941	Catabula
UBA2245	Docibana
WRAX01	Visibula
RUG033	Denixella
2-02-FULL-48-14	Forabia
H02-45-28	Supelana
B1SED10-159	Macilella
UBA6898	Fecunella
GWE2-29-8	Venucana
UBA2778	Linigida
B25-G16	Bicodula
0-14-0-80-42-15	Pimenaria
UBA8901	Supelella
CAG-382_A	Regigana
LOWO2-01-FULL-3	Malifana
GCA-002791395	Vecorosa
UBA5862	Genocaria
WRBF01	Diritida
PWTM01	Vinacula
SHXW01	Dilogana
2-12-FULL-67-15	Susicula
2-01-FULL-43-14	Lorarosa
UBA1188	Vitifula
UBA3531	Binocia
JACTMZ01	Carunula
TMED161	Vacilula
GWE2-39-37	Malifula
UBA1247	Bimotia
Lenti-01	Lavacaria
UBA6164	Palifella
UBA12445	Cenodaria
UBA3940	Direpida
GCA-002684695	Tigurella
J004	Celumia
ETH-SRB1	Benevula
UBA9783	Holisana
BM004	Corocaria
2-12-FULL-40-10	Megalida
VMGY01	Detososa
RBG-13-36-15	Resuria
GWC2-42-12	Panifana
GBS-2	Subucida
DP-6	Betacaria
13-1-40CM-64-14	Refulula
2-01-FULL-52-15	Catobula
GCA-002793355	Visocana
Gp7-AA6	Semapida
UBA2174	Cisorida
GCA-00278855	Casabaria
JAAYUG01	Recomula
DSM-29158	Detenaria
UBA1556	Depopella
DSM-103792	Tomacaria
2-01-FULL-56-20	Socagosa
UBA9215	Cocolella
GCA-002694895	Visibana
RSA9	Cicatula
UBA2166	Recorana
GCA-014075295	Nocumaria
02-FULL-45-10c	Delubaria
UBA10348	Divorosa
PXBB01	Defosia
SHLQ01	Mavorula
UBA8131	Nocumana
GCA-2717185	Munimella
UBA5755	Figilula
2-02-FULL-58-16_A	Bulapana
GCA-002722245	Ridibida
VSJD01	Semigella
UBA3943	Verecosa
UBA2020	Lucubia
UBA3939	Ceromida
UBA4767	Giganula
JdFR-85	Benepia
ST65	Bicinula
UBA11858	Malifella
UBA7239	Monimana
B5-G15	Feculida
SZUA-47	Cuticida
GWC2-42-11	Robigosa
UBA6532	Vagabida
RVW-14	Direpana
GCA-002691585	Benevida
UBA729	Pedifia
CAIQOK01	Nicomula
UM-FILTER-48-10	Categosa
IGHO2-01-FULL-4-A	Holisula
Lenti-02	Sicinosa
CAIRNS01	Palifida
RBG-16-66-30	Refinia
DT-91	Necubana
B12-G15	Catapida
DTGW01	Monumana
UBA9579	Manibaria
2-01-FULL-41-18	Hexagaria
GWB1-45-9	Nucifula
UBA228	Denixia
UBA2193	Laxitella
CAIQCM01	Cataposa
QOAS01	Coturula
UBA2251	Lucifia
XYD1-FULL-40-9	Delecella
UBA4811	Peribaria
SXRF01	Hecataria
VBWQ01	Feculia
UBA1532	Democella
GWF2-38-69	Fibicida
BMS3Abin05	Haricosa
GCA-002724975	Penurana
PWQF01	Colapia
YB12-FULL-65-16	Demadida
UBA7312	Vepalella
CAIZIN01	Vinulella
FEN-1388	Conabula
GCA-2722455	Penecida
UBA10324	Verecia
SpSt-899	Volunosa
J090	Genufida
DUUL01	Dinupella
GAS474	Regifana
SKLO01	Dilicana
TMED113	Fusifula
UXAT02	Peracula
AAA071-K20	Tegumaria
DUVY01	Bifarana
JABAAI01	Nefanula
UBA3637	Ceracella
2-12-FULL-38-22	Semifula
SCQP01	Codifida
PALSA-1355	Monopula
BM512	Vagabosa
RBG-16-57-12	Resuposa
JAAYDE01	Nosocia
MCWD3	Dilemida
CSBR16-119	Daducaria
SHYO01	Ciminida
PWPN01	Pomifida
JAAKFR01	Recucana
RGXB01	Tenilia
OLB20	Nutamia
CAIZGN01	Bacifosa
SIBH01	Domabaria
UBA9216	Conibella
OMJO01	Cerebida
QNZT01	Recomella
UBA3254	Penurella
M1805	Lanifaria
RAOX-1	Luticella
ZCTH02-B6	Relecella
UBA1319	Feculula
SHYZ01	Peribida
UBA3076	Catapia
UBA1877	Cosidosa
GWF1-51-8	Funamula
GCA-2748055	Demagosa
WYBJ01	Bisacia
JAACFD01	Siminida
UBA11574	Momorana
AC-14	Desonosa
NAK82	Minagida
UBA1321	Vinolula
JAAYNZ01	Bicapula
BHER01	Dilemana
UJ101	Malogaria
B15-G9	Purularia
OSC116	Letifana
UBA2780	Munifaria
GCA-002723415	Levifana
SURF-7	Denunula
JAADDG01	Lucubosa
SIRW01	Genufella
DSM-24629	Conabia
RBG-13-40-8-A	Negotana
UBA5550	Velivana
WRDA01	Dilibaria
CAINNR01	Fecunana
JAABVY01	Nugivula
DSM-100316	Detepula
CSSED10-376	Cerevula
UBA5734	Xeropula
UBA2796	Salubella
VMEP01	Carecula
2012-02-01	Lanugula
UBA6930	Homicula
WHSQ01	Recumana
CAIYYI01	Domabida
JAAZOP01	Pecunaria
DRUE01	Vivifaria
DSM-19610	Catagula
GCA-2721365	Reduvula
GCA-2747955	Homagana
JABMOW01	Ceracaria
JABCYS01	Conibana
ZOR0009	Sanabula
2-01-FULL-50-11	Tenilida
4484-95	Duponida
1-14-0-10-42-19	Culigida
UBA1441	Renavida
GCF-1484045	Notacosa
UBA6769	Catecana
CF-107	Denunida
J042	Diluvida
JABLXH01	Direposa
IGHO2-12-FULL-4	Duricaria
QS-5-54-17	Vilipida
HyVt-16	Cacomida
WHST01	Desupella
BM303	Pacifella
HLUCCA01	Nubigana
XYA2-FULL-39-19	Delucaria
SZUA-152	Docibula
UBA6065	Lutulida
DUMB01	Bacifia
UBA6177	Solifaria
GCA-2719675	Vatilella
JdFR-86	Catapana
DTYK01	Conifula
UBA3700	Sicarella
CAIYCZ01	Dilemella
JAADDB01	Denomia
JAALKR01	Cerifula
M0112	Rorarana
DTLI01	Sacomaria
DTLJ01	Semaparia
GCA-002770795	Conoposa
UBA5627	Lapilosa
UBA1715	Veridaria
1-14-0-10-41-12	Cocodida
CAACVY01	Fusifana
SG8-13	Melopia
RBG-13-42-11	Lubenula
JAABRJ01	Dicibosa
WOUV01	Manufana
JAADED01	Videlosa
J111	Tabifaria
21-14-all-36-13	Ridibana
E44-bin32	Binocida
GCA-2699445	Dupunana
Bog-1112	Culilana
JAADDX01	Sicinida
UBA2294	Petulula
DUMC01	Notacida
JAADHN01	Tenilella
UBA11373	Bigarana
JABSRG01	Lucerida
GCA-2718715	Rorulia
UWMA-0217	Lanigula
JAAUTS01	Lucifella
UBA1750	Domabula
UM-FILTER-53-11	Vavasosa
UBA8524	Dicabana
SLTJ01	Disidana
TMED198	Remedula
PLA5	Genufana
TCS60	Tenemida
B47-G16	Subadaria
PXCX01	Nefarella
PHBD01	Peridana
DSM-9756	Deculella
DG-60	Derunaria
UBA1234	Desucella
B36-G15	Conarida
JAADGE01	Favonaria
UBA7430	Desacia
NORP154	Dehinaria
QOAL01	Sonipida
33-17	Soliposa
UBA9973_A	Fatilana
WHTN01	Pavicosa
JAAEKA01	Denavana
FEN-1173	Didacaria
D1FN1-002	Forinula
UBA5754	Capudula
UBA2029	Selibaria
2-02-FULL-48-12	Dapifaria
UBA11051	Semipia
UBA3067	Molecida
SXHM01	Cotenida
CAIXPF01	Sicubaria
HMF5848	Cituvana
SMWR01	Penicella
SCTI01	Venucaria
CAIWVZ01	Sicinia
SZUA-254	Cetarella
SCRA01	Morigia
UBA6156	Cenotida
SBBT01	Dedigaria
UBA1449	Demagaria
GWA2-46-15	Bugilida
SBBA01	Vigenosa
JABAAK01	Ratifana
JABAAW01	Panifella
NS-4	Cadavula
AE-B3A	Ciminaria
BOG-932	Peridida
DTGS01	Notacia
SURF-24	Verecaria
UBA6429	Volubosa
KCTC-12870	Denuposa
LMEP-6097	Maxumia
JAAYTX01	Velivella
21-14-all-47-15	Dibapella
JACDCH01	Gerunula
YD0425bin50	Visocella
UBA9547	Gemebia
UBA6265	Cibarosa
SHYK01	Perabana
SZUA-545	Vitigaria
UBA6910	Cibicella
Firm-18	Resulosa
MVZH01	Detenia
2010-02-01	Denorida
DTJR01	Sifunida
UMGS416	Corocana
Cfx3-03	Derelaria
GCA-2748835	Laxitula
DTLH01	Malifia
SCOH01	Dilecana
JACDBH01	Hexagula
T1SED10-24	Conibia
UBA12223	Refunida
PNKZ01	Voragia
Ga0077523	Turifia
DSAB01	Delacida
SAAU01	Vilipella
DUMO01	Mavorosa
JAAFIG01	Resulida
SZUA-191	Documosa
UBA5620	Semaposa
Gp1-AA117	Linigella
J027	Tenemella
CAJBRS01	Catocosa
GWA2-52-8	Semidula
SHYF01	Redunaria
UBA11359	Cituvosa
BM520	Subodaria
2-12-FULL-41-13	Levifula
UBA1396	Culilella
UBA5616	Gasomella
MFKM01	Horomella
SG8-40	Hibisia
CSP1-5	Metabosa
JAAXQG01	Morigaria
BJGX01	Necopella
QIAW01	Coninida
RBG-16-54-18	Funivaria
B3-Chlor	Telefula
J094	Cuferida
PWNZ01	Volucula
DRKV01	Lutulana
UBA2593	Direcida
HRBIN34	Catafosa
UPPP01	Depecana
DTSZ01	Bipalella
JABDKJ01	Totidella
CG2-30-32-10	Subadosa
JACMQJ01	Vacilana
DTKZ01	Luculana
JACAEZ01	Pulegaria
YD0425bin51	Culilida
GWF2-45-14	Macilaria
DSSU01	Repudaria
SCKK01	Nubigaria
UBA6016	Mahelosa
B14-G1	Capudosa
2-12-FULL-41-12	Sicunella
NP-7	Notabosa
JAADGR01	Papavula
JACIWR01	Cicatida
JAADEO01	Nocenaria
DSTG01	Melopella
UBA5962	Lenocula
SCTD01	Derelella
UBA5760	Holisella
JAACEL01	Peroparia
J016	Pedepia
UBA3534	Taxilia
E44-bin15	Demogella
UBA6668	Lugubosa
UBA3002	Coniparia
B3-G15	Monumaria
QOAV01	Divolosa
SKK-01	Colepella
RPRI01	Cicarella
0-14-0-80-60-11	Depubana
J089	Subabia
SHXO01	Conararia
JAACPR01	Canacaria
SIT17	Conabella
UBA2595	Timefana
1-14-0-20-49-13	Ranunana
VFKH01	Canacana
WPAF01	Detecaria
JAAXUF01	Menaposa
CCMP332	Melilella
SLPX01	Manupella
RBG-16-58-11	Cerifida
CACZYB01	Coturaria
SIO1D9	Cenacida
UBA6013	Semifosa
RSA17	Devecula
SZUA-584	Senacosa
WRIO01	Ceracida
JAABTS01	Peropia
172606-1	Horomosa
SCQA01	Desomida
WHTK01	Cibarella
UBA7332	Pudibia
UBA8987	Serotella
UBA6053	Vecoraria
VFHL01	Cimitia
B18-G4	Renavia
RFNS01	Ranunosa
QAKW01	Miliparia
Ch109	Cosigana
4572-128	Cosigosa
BX7	Bipinia
PHET01	Pavimula
RZZM01	Xenodosa
WRGA01	Homolana
CADCTF01	Divorida
JABDDJ01	Catocia
2-12-FULL-40-12	Nehalida
Fen-1364	Decunida
UBA1318	Vatilida
CAIJLX01	Xeramia
DUZN01	Bigemida
QGNO01	Canacia
RBG-13-46-9	Sitelella
SCTJ01	Solivula
Bin103	Cohorosa
UBA5500	Rubecosa
SZUA-35	Bipatosa
JAACEH01	Cenotia
UBA1758	Benemia
UBA12247	Rurigia
SBBU01	Murilida
DSKJ01	Xenopia
JABDBP01	Detumosa
JACMKV01	Vehemosa
Im1	Saxopana
JAADDD01	Remularia
JAADHH01	Bucelia
VMTK01	Pulegana
QHCA01	Homulida
PXDI01	Lapicia
SURF-15	Futatosa
ZC4RG38	Duponia
GCA-2861595	Cemenida
UBA5297	Homogida
UBA3824	Dibaparia
SZUA-371	Selibida
UBA3375	Cobalella
IMCC2047	Direpula
SLO01	Duricosa
DTGN01	Maxilella
JAAYMJ01	Rorarella
HyVt-429	Dicanana
GCA-002719095	Serotana
QHBQ01	Fecunosa
SHYT01	Denicula
UBA5343	Melilula
DSM-25080	Monocosa
CADBOM01	Tirunaria
DC0425bin3	Cunabida
JAAZDR01	Lupanana
UBA6187	Sarabida
DSMQ01	Peribella
SPBP01	Decacaria
W3P20-009	Xeropana
PGYQ01	Perexia
HCM1	Semipella
JAAYPU01	Nitelida
BM523	Denorosa
UBA6663	Hibisosa
SKUG01	Recumosa
CAIMLA01	Cosidula
RBG-16-43-9	Maligana
CADDYW01	Levidella
Zgenome-0027	Refinella
JACDEA01	Solifana
MES13	Cerevella
SKKY01	Domicaria
SBAT01	Fetutida
CFX8	Cohurula
AC-35	Homilida
PCPOR2b	Semilaria
HGM11501	Necubula
PFDW01	Repecaria
DSQI01	Rarefosa
GCA-2742885	Sotulella
E44-bin88	Cerarella
UBA12532	Delapana
GCA-2746185	Benepula
JABSSG01	Fumacosa
DTJG01	Siticosa
GCA-002772895	Turicida
WRAG01	Velivida
BLZN01	Coturia
DULL01	Taxilaria
SZUA-224	Pedepula
BuS5	Funamosa
GLO-12	Sacopana
DSCS01	Bicalaria
GCA-2689995	Mirabida
JAAUUE01	Doxolosa
2-01-FULL-45-11	Fiducosa
J135	Paracosa
Ch27	Recogula
UBA4661	Forabella
SZUA-104	Cerimella
SZUA-8	Saxopia
UBA5342	Tametaria
FEN-1343	Colapella
RBG-16-39-9b	Perexella
SZUA-401	Sicarida
1-14-0-10-44-23	Revulida
GWA2-38-13	Decinosa
UBA6794	Bisulula
QHCF01	Tirocula
CSSED10-335	Regifella
DRQF01	Lenimula
JACOMY01	Cerucaria
HKI-0501	Rubicia
VMFF01	Vicatida
JABDGR01	Conabida
JAAYIR01	Demogula
BM714	Ciniposa
21-14-0-20-44-7	Monacia
GCA-002704045	Monodana
UBA1709	Bonifana
DRME01	Dilogella
DUOF01	Redunula
UBA10511	Bicalia
SG8-11	Nicotaria
SHYC01	Decapida
GCA-2720935	Rorulida
RBG-16-45-19	Rorifosa
UBA912	Masocana
UBA7701	Telefella
DUOV01	Perabosa
GCA-2401445	Cululula
CAILUR01	Decucida
PALSA-660	Minagana
DG-74-3	Viragaria
WRJC01	Bisacana
UBA1257	Benifula
DTHC01	Colimia
JAADFP01	Dupunida
DTMQ01	Catagaria
QHCE01	Didacida
RFSG01	Depecella
DTKC01	Democosa
AV2	Viginosa
[truncated: 6,607 more rows]

## Sheet: 31,072 bac sp epithets applied
sp007827395	cinefastra
sp000192635	bifaritio
sp900317315	recogax
sp003209915	relapitica
sp004167605	resaletta
sp000635495	solificella
sp002018365	licenessa
sp903895195	desoniforma
sp002294985	parocimonas
sp903885165	dimidibra
sp900317555	didacilega
sp903899375	homilousia
sp005843835	sanabatica
sp000787395	monogiforma
sp002930885	semifitudo
sp900316555	munimilenta
sp903897155	maligitica
sp903857495	bigemibra
sp005843825	foricicella
sp900316505	semibitura
sp900317925	resaligena
sp001556435	defenitio
sp900320325	bugilibra
sp900469175	patibatio
sp903909215	nugigax
sp903834135	tirunitia
sp006442685	depocimonas
sp903838355	patibibula
sp903935355	defulousia
sp002354605	dilibentia
sp003489145	tegimugo
sp903869265	fusififorma
sp000502715	conigentia
sp002342365	femelimonia
sp903960135	legifimonas
sp002232035	bisulitica
sp002139915	taraxilega
sp005843885	favonifica
sp900316045	casabentia
sp000682775	decucatio
sp002874965	rorifousia
sp002282935	coninentia
sp903908265	vavasicula
sp900318625	delebitudo
sp903854235	verecastra
sp903944725	defarimonia
sp903959665	manomitica
sp008632075	remeditas
sp903863905	tegumiforma
sp900101015	minuressa
sp903869365	curacifica
sp000208585	detesifica
sp003996995	levifisca
sp900319655	ludibitas
sp900473305	hirunousia
sp900100595	rorarilega
sp900472835	rutabiforma
sp003213625	monodetta
sp900317475	derunastra
sp903848885	solififica
sp900315925	desepitoga
sp903913215	resuressa
sp001989455	viceciforma
sp903828665	curotigena
sp002347935	modifivita
sp003138815	disidigena
sp003155915	depetessa
sp003140595	casabitica
sp903838295	catilicella
sp903832735	senacousia
sp903994525	telegimonas
sp002850555	remulastra
sp900315775	subacetta
sp002884815	turiligena
sp000008385	funamilega
sp003024715	defarifica
sp903870145	rubicentia
sp005233515	minagedo
sp903852495	cisoritio
sp002119605	cosidiforma
sp002364085	venefitoga
sp002358345	delebatica
sp903830425	fumifitio
sp003480185	dimacedo
sp903835655	semapugo
sp903861715	colapimonas
sp903871335	resurifica
sp002478045	peraditas
sp900314535	timefetta
sp003142185	viburitio
sp903916595	turicentia
sp900318875	galacifica
sp003021505	morigitrix
sp903848955	vigenastra
sp004791585	cohoritas
sp002378465	nutamicula
sp000634515	nubigivita
sp003162935	fetulago
sp903834145	recucitrix
sp002359635	penuratio
sp900318065	catecastra
sp000173115	benepugo
sp903882525	funivax
sp003487125	bimotitica
sp903845935	cimelicula
sp903953055	selibitio
sp900317845	susicitrix
sp900102385	navicivita
sp903884235	capudicula
sp900066395	detoritrix
sp903838415	monogentia
sp902636535	deculicula
sp002223185	nosocibula
sp903871555	humecastra
sp903885085	cohorimonia
sp004791165	ceracilenta
sp900317285	murelatio
sp902788805	parocitia
sp004020645	saxifitio
sp000634215	biveriforma
sp002451435	cerimitrix
sp003205815	favilitrix
sp900469475	conubicula
sp903869725	bicubimonia
sp000437595	pimenigena
sp900473245	rubigugo
sp900316645	vocifimonia
sp003139355	recocetta
sp002298665	demulessa
sp903952205	vitabilenta
sp900317125	cibaritica
sp900317945	vavasitrix
sp001655595	caselitica
sp903825035	selecitudo
sp903846025	dilemugo
sp902613455	benifentia
sp903855995	vitifisca
sp903842675	tigurago
sp002696735	demigitudo
sp903887775	vicecessa
sp002781365	decamilega
sp900066115	lenocimonas
sp900320025	lanugago
sp002407675	cohonimonia
sp003952425	nicomastra
sp003453595	vanidigena
sp003234365	mutabivita
sp000999465	benivicella
sp001808955	manupigena
sp903878415	homicedo
sp001655615	benivitas
sp903877385	vanidessa
sp002335925	solivousia
sp002470125	repagitura
sp001914695	notabetta
sp900314565	resalimonas
sp011775625	colepitudo
sp004791025	cerifigena
sp009838195	denoritia
sp014287675	conubastra
sp003134375	murelibra
sp002998595	demulimonas
sp004022705	hiruditudo
sp003138365	sacopitio
sp900316365	bulapedo
sp003466125	viripitica
sp002779995	podagimonas
sp002954425	desorago
sp903844845	bicodicella
sp001522585	pinacimonia
sp002102975	vinulilenta
sp002399265	debucitas
sp003471165	repepentia
sp009843525	galacastra
sp903898555	dibapatio
sp900317175	vocamitrix
sp903914945	homunousia
sp000503835	munifimonas
sp903870905	bicapivita
sp001029675	cadurago
sp900318795	retunivita
sp903889565	regigibula
sp900321715	tenemitia
sp002723125	decamimonas
sp001775095	bonifugo
sp903843315	maligiforma
sp903839845	velivatica
sp900319515	relapousia
sp002407925	citocigena
sp900466475	dibucax
sp002470605	semidatio
sp002410345	vitigilega
sp903832855	venunitrix
sp003436275	categago
sp903843305	depetigena
sp000306885	citocibula
sp002347925	vocifitica
sp900319025	ranunitura
sp003155135	capudigena
sp001767295	cotenibra
sp900319865	forinessa
sp900320055	catocitas
sp001423965	ludibitoga
sp903865435	velivago
sp903821145	petuliforma
sp903870315	sonabitica
sp903944165	rosarousia
sp900317745	tirunivita
sp903827375	penicilenta
sp900322145	hibisatio
sp900315095	cicaritica
sp001830045	recucicula
sp903910745	vocifastra
sp000991405	regifatica
sp000177195	siminilega
sp903861835	valefugo
sp013283365	tegimatica
sp903861125	devecitrix
sp903937405	tametifica
sp000252525	fusifitudo
sp903895995	turibastra
sp002313585	humecousia
sp900316285	camilicula
sp008930665	meliletta
sp902768995	cohonicula
sp002299315	linigitrix
sp903820085	direcugo
sp003469205	mirabifica
sp002400085	maleditica
sp002113595	desomisca
sp002168225	dicibedo
sp903938485	derecessa
sp000432435	filifentia
sp002293155	femelessa
sp002929845	dehonitrix
sp900319685	categedo
sp900314755	murelilega
sp000799775	delubitas
sp900315955	selecastra
sp003011855	culigiforma
sp002964915	dilemimonia
sp002902985	bonifimonia
sp900314935	corocivita
sp001785445	conabicula
sp903828695	citipibula
sp903840355	semigigena
sp000949135	denigax
sp900468285	notabessa
sp003280455	ficulivita
sp001429285	mirifilenta
sp002862705	patibicella
sp900066565	faticugo
sp001438145	fibicitrix
sp900316905	derunugo
sp002412985	depocibra
sp003138855	tegumastra
sp002697465	lugubitica
sp903834705	vanitifica
sp903953215	cunabitas
sp903829855	hirudedo
sp000996895	decucousia
sp002356435	turibicula
sp903877935	conifatio
sp004292955	decitatica
sp003139775	desoritia
sp001627375	homulibra
sp002391315	defosatio
sp903893565	sitelimonas
sp900066535	semibatio
sp903954205	coticicella
sp003160115	fumacicula
sp002325245	detecibra
sp903940125	corocugo
sp002398105	repepousia
sp003486095	ratifilega
sp902801475	mavorivita
sp000186165	dilogilenta
sp903893805	diminugo
sp009363615	semimimonia
sp002895025	tenilentia
sp002410505	cacopivita
sp002471665	catapitura
sp900316075	benemibra
sp002354005	pimenatica
sp002363955	reduvitica
sp903951385	fidenago
sp003086795	benevitrix
sp009844085	hemiticula
sp000954115	bipatastra
sp903914175	faticigena
sp002724845	bonitibula
sp903861115	benemitura
sp900319075	curotilenta
sp903830745	carecastra
sp002298805	conabitas
sp903879335	nitelitudo
sp002410615	susicivita
sp002437725	hiruditrix
sp003439125	dehinitoga
sp903838565	lutulicella
sp903945175	secunitio
sp903827245	delebisca
sp002752635	fecunitio
sp010024385	docibitudo
sp903904095	cimelitica
sp903830655	dilogimonas
sp001822075	manibitoga
sp900066615	cosigatio
sp900318535	turibitoga
sp001767835	recumedo
sp002492595	coturatio
sp001029755	cadavitica
sp000404785	dehisibra
sp009842675	patibifica
sp903994455	nutabimonas
sp903949285	pacifilega
sp002690585	serotitas
sp000752675	citivago
sp002437285	saxopisca
sp900316615	noninessa
sp903871935	domigibra
sp900316715	funivivita
sp007280285	timefibula
sp900066785	buxifivita
sp903832775	dimacisca
sp900321685	conabitrix
sp002364215	depasifica
sp010023045	casabimonia
sp003514385	terebifica
sp900469615	vitabivita
sp000270205	deculilenta
sp003455995	cibicicula
sp001437855	necopitoga
sp903836465	perabitas
sp000378305	fidenentia
sp903825285	lenocitas
sp002406055	purulago
sp003584895	tubicentia
sp002362485	licenivita
sp001824295	direcisca
sp903843965	resulax
sp004557245	velivifica
sp902622595	vacilicella
sp003514055	negidimonas
sp001411535	papavatica
sp903907955	diponatica
sp903899965	semibicula
sp002408485	fetifago
sp900316005	ciciledo
sp903961015	meriditica
sp002490635	bonifivita
sp903823865	depacitoga
sp002493045	subabitia
sp900557255	lupanentia
sp003170375	decupessa
sp900317685	semapentia
sp001825035	legificella
sp900317915	bimetousia
sp903822525	denomibra
sp001627335	colutitio
sp900314985	colipentia
sp003165675	curacitica
sp903852585	sonipentia
sp009836025	tomacatica
sp002112885	corocedo
sp002452215	munifago
sp903867285	democilega
sp000995845	delacigena
sp900314915	supelitas
sp903994635	denunilega
sp002251295	ciminiforma
sp002296525	dilemitrix
sp900315605	papavitrix
sp900321745	verifessa
sp900318955	tegimago
sp903944295	lavacisca
sp903882745	periditudo
sp903900235	cacalibra
sp001642945	carucibula
sp903898755	semiditudo
sp003433845	conigitio
sp001774105	letifetta
sp013112245	conamibula
sp900320865	conigitura
sp903887375	navicugo
sp003491505	dilogivita
sp900321955	sifunimonia
sp003282105	semifibula
sp902594855	momoredo
sp900318085	nugigitrix
sp000568095	defaritia
sp001442985	pepenitrix
sp900320185	baropicula
sp900321655	detorastra
sp002409675	ruricitoga
sp001689615	dilematio
sp900318915	catapilega
sp000817105	depopessa
sp003282445	casabatica
sp902599405	luxurax
sp903939515	lenimibula
sp009928245	vilitimonia
sp001780725	vocamago
sp004020875	lenunisca
sp900315485	depetedo
sp014077005	decucitia
sp903883645	fumififorma
sp002409745	catocitoga
sp001635685	dilibessa
sp003514005	caravicula
sp902792815	televitura
sp902570035	pomifitia
sp003459245	derecetta
sp004010935	monodax
sp003170655	nutamessa
sp002009645	malogibula
sp900314715	terebilega
sp004293645	resulibra
sp900320565	resurentia
sp002082305	macilax
sp010025655	taraxastra
sp003512955	mahemugo
sp002715065	refinicula
sp003212335	catilugo
sp001524625	lugubugo
sp004284195	lorarimonas
sp003217375	homagivita
sp900315085	rorulitia
sp903836945	depopitrix
sp002477475	cululago
sp903960645	galacugo
sp900066365	voragilega
sp003952505	colutugo
sp001002415	habacitoga
sp002784145	terebibula
sp000377405	sanabivita
sp900094895	gemebicella
sp002979555	deculastra
sp900315305	conibentia
sp001784155	caduritica
sp903897715	binocax
sp002381225	monumedo
sp001873295	ludifax
sp002500925	depopatio
sp000989675	patibitio
sp002451795	recorisca
sp903847095	sanabax
sp902800805	defunilega
sp902612915	lugubatica
sp903872035	domabifica
sp902600705	remulifica
sp003447825	forabedo
sp900467885	cerebitura
sp900319715	nocumastra
sp003852235	papilugo
sp001777915	delacicula
sp900319925	fidenitrix
sp900317085	genocicella
sp001803165	pomifentia
sp011772965	depupitura
sp003003055	lutuliforma
sp001940855	ludibousia
sp009698815	pomifibula
sp002449305	dapifitudo
sp903856725	bimetatio
sp002383105	categax
sp002457055	depecigena
sp900313215	catobimonas
sp903877645	peripitio
sp903938815	desupifica
sp900469965	ceromilenta
sp900066545	carucitio
sp000213055	bimetedo
sp002139875	conabibra
sp002436415	nugivugo
sp003165155	bovicatio
sp002470695	verifibula
sp000376585	semififica
sp002404795	papavitas
sp002293105	tabifigena
sp001803045	maligitudo
sp001894745	cilotitoga
sp903885375	necubugo
sp903852755	fumacicella
sp002420315	nimirastra
sp003213165	detosibra
sp903886275	lenimatica
sp903840315	lubenago
sp903916385	deforitrix
sp903937385	sotulugo
sp903908165	coninivita
sp002439755	bicoditrix
sp900316265	refunitoga
sp002437665	penuritrix
sp900316935	loripitoga
sp903827945	turilibra
sp002709955	vilipibra
sp903939115	duponifica
sp000284455	butubifica
sp000765235	lapiliforma
sp903843225	denupastra
sp900319035	citivibula
sp001423585	vanititas
sp900317795	denunago
sp900318335	rubigastra
sp900156465	direcax
sp900315455	morigivita
sp002933775	visocitoga
sp902589965	daducifica
sp903917345	homunibula
sp001276215	gasififorma
sp903877945	delucatica
sp010031985	noninimonia
sp900115375	semunivita
sp900318175	tiguredo
sp900105515	vitupitica
sp900314995	detosatio
sp009700115	pavicetta
sp900316835	diponessa
sp002788135	coluticella
sp000435055	culibentia
sp903896045	dilemitas
sp900100635	conabastra
sp900066335	curacago
sp001829185	bipinitudo
sp902587325	peripedo
sp003281085	domiciforma
sp003141095	rosaritura
sp900315045	navicago
sp003531055	rudecibula
sp003162875	bovicentia
sp900317825	hemitiforma
sp900541145	semipisca
sp001796315	cosidousia
sp002836505	ludificella
sp903895595	solipastra
sp903945375	didacimonia
sp002438635	bulapitica
sp900314685	baropigena
sp900317305	resulessa
sp900319615	cisorifica
sp002457765	pacifibula
sp014189895	noninax
sp000765155	senacastra
sp000995965	colubetta
sp002394385	depicax
sp900317985	codificula
sp903873135	detepitoga
sp002782005	detoticella
sp900187385	fetifastra
sp001001205	decomicula
sp003161855	bipaticella
sp002305085	saburitoga
sp903909815	desuritas
sp903874055	cohorivita
sp001693275	nitelitas
sp002477465	bimotifica
sp000436335	nivomicella
sp003584865	canacetta
sp000312705	homicitoga
sp001818235	minuribula
sp009840635	manomatica
sp002457135	cohonibra
sp001797665	defanitrix
sp002295115	depicilega
sp002259335	relenitoga
sp011772205	repudisca
sp900066215	camilivita
sp001420995	lorarugo
sp002336245	dicabimonia
sp002314055	carunousia
sp903881475	volunigena
sp014223685	facunitudo
sp001595495	masocigena
sp001078575	lucerilega
sp903876735	licenitudo
sp014227775	rubicicella
sp010998615	semapitas
sp003217095	petulitio
sp001029775	documitica
sp001425605	refacitoga
sp001438605	colipetta
sp903921405	cepulifica
sp005787245	tomogitura
sp903821995	cilibimonia
sp009698615	nivomisca
sp903824855	milipatio
sp003166475	coturimonas
sp000009845	pacifimonas
sp000829315	meriditrix
sp902596515	hegumilenta
sp900316565	dibucicella
sp000972765	hirunigena
sp000369645	lacinimonas
sp002779605	nefanitudo
sp003584875	sanabugo
sp002729215	cosiditudo
sp900066775	risibicella
sp004557565	disidifica
sp011772445	podagitudo
sp003526955	doxolicula
sp002797655	bicubibula
sp900313705	manomatio
sp000431375	ludimedo
sp002361235	suboficula
sp900240235	nugivitoga
sp000437715	regifivita
sp006440675	murilitrix
sp903942465	conibatio
sp003213095	lapicitudo
sp001297015	detesigena
sp001818155	tibicibula
sp900322105	legifisca
sp001871325	carunisca
sp002875705	momoricula
sp000297435	tametibula
sp900315525	homulatica
sp009700405	fiducitio
sp003202795	desoritas
sp003968755	diluvessa
sp002931055	lapicatio
sp002752355	monocousia
sp002472565	bimetitrix
sp009837445	resacitica
sp900316295	perexessa
sp001804415	siciniforma
sp002718595	sepositia
sp002437305	dicimax
sp002313655	divoribula
sp001786195	genocatio
sp002384935	latibitio
sp002450335	masocentia
sp013111185	melopax
sp009837815	buxanatio
sp902529055	sicunimonas
sp001556125	bifisivita
sp900100265	morigedo
sp900548775	lacinetta
sp002411175	turilicula
sp004020545	luticedo
sp003162635	vitupilega
sp900314495	purulastra
sp900315835	celamitoga
sp001871685	sugilitrix
sp902523065	subucatica
sp002783865	xenopago
sp002398875	locupastra
sp002694685	forabitas
sp002782305	nubigitica
sp900316995	levifitio
sp000153545	saxopitura
sp002430725	direcitio
sp900316235	macilitoga
sp903857825	lanifedo
sp902790215	metapitudo
sp002706095	benemago
sp001776935	cisalessa
sp902622845	defacedo
sp000431835	fiducax
sp002584985	vecorilega
sp001664485	feditentia
sp002491945	rorulago
sp001414325	cenacedo
sp000996035	faticivita
sp903835005	hibisousia
sp001468485	veridimonia
sp002413625	genocentia
sp900315055	colepisca
sp001555965	tetenitoga
sp900112625	mirificella
sp000436475	monociforma
sp002344135	dibapitio
sp003161045	risibimonas
sp000991245	culibitas
sp001469005	sonabago
sp004020365	faviletta
sp001029635	denigitio
sp010030895	rudecitura
sp002294945	doxolitrix
sp902609685	denavedo
sp002344125	nugigibula
sp009841335	pericibra
sp003222205	capucitudo
sp002259485	salubago
sp002491245	satacatica
sp900321245	hirudastra
sp003213155	pavicatio
sp001768195	malagicula
sp002500205	detosibula
sp014076845	manupitudo
sp903821875	secunitoga
sp002439085	cisalitas
sp900467745	defesigena
sp002774425	carecitica
sp009840575	pudibugo
sp001871795	catocitrix
sp903819975	dilementia
sp902761655	depocitudo
sp903878285	bigemitica
sp002691485	semapastra
sp005465875	tubicimonia
sp003024605	dibapessa
sp900319235	penecitica
sp903927025	televitas
sp900319065	habacessa
sp002365175	tomacitia
sp900320755	nubecitio
sp900314925	catapibra
sp903918375	catafitoga
sp003014915	peropitica
sp000433215	semibitio
sp900317045	munimigena
sp902616715	vinacilenta
sp900758375	munifastra
sp004556065	derelifica
sp002862715	subinitrix
sp002335865	fibicago
sp003133075	siticitrix
sp902530745	dicimiforma
sp002449765	reduventia
sp903839035	mavoressa
sp001786955	virecugo
sp003480725	cuticousia
sp902526005	luticilenta
sp002843585	malogitura
sp900143565	caravitica
sp002292345	melililenta
sp003561535	dicabiforma
sp001603165	valefetta
sp002683785	decatisca
sp903896015	xenodago
sp903871855	devecatica
sp002449635	celamisca
sp900098805	tegumifica
sp001438205	colubitio
sp003026105	daducitoga
sp903870545	lucifetta
sp000434975	debucax
sp001627865	decacitudo
sp002690655	didacentia
sp903848795	nocenivita
sp903838035	lutulessa
sp903951425	volubitica
sp003529475	fecunitas
sp002192255	cohorisca
sp009845995	sicunitudo
sp003539515	gabinousia
sp002449145	conibugo
sp903862885	catecibra
sp002783585	defacitio
sp004557735	domigitica
sp002384685	derelastra
sp001873065	cacaliforma
sp002420425	resupitia
sp903887235	cerifimonia
sp001567405	monogigena
sp902595555	capucitura
sp003033885	bimotilega
sp002437565	semunousia
sp900316975	cisaledo
sp900321775	siticago
sp002351725	tenebessa
sp903862845	vigenifica
sp003132405	vecorousia
sp903928685	valefatio
sp002703265	bicipitica
sp900187515	conabentia
sp003609875	satacilega
sp000989515	luculatio
sp001468225	democimonia
sp002367435	decupetta
sp900317855	ceracatica
sp003234565	pimenicula
sp003538135	telefentia
sp903826775	regifastra
sp004212975	nugigigena
sp900142495	solifimonia
sp000998275	ludififorma
sp903952265	loripibula
sp902776305	daducousia
sp900318995	divoredo
sp900468625	delecifica
sp002135195	venefatica
sp004362375	nosocibra
sp002448285	sacomastra
sp003445895	retunitas
sp003224335	fibicousia
sp002432715	tumefedo
sp903911435	nefaritrix
sp002102825	malifax
sp900114915	bicinitio
sp900317525	papavatio
sp003134115	galacago
sp903906055	recocitudo
sp903893745	cicatitica
sp009838845	redacimonas
sp002346745	domigimonas
sp902728235	taxilitia
sp001787755	taxiledo
sp001778695	depecisca
sp900321785	luxuratio
sp003086695	volucicula
sp002399445	fatifatica
sp903848935	peridimonia
sp003170825	fuligibra
sp003487665	vocamitudo
sp002381125	herinousia
sp001627925	detepibula
sp003542615	melopitoga
sp900318555	betacitio
sp002343775	meliliforma
sp002730875	sicubugo
sp002375495	cerucentia
sp903914075	defetiforma
sp002706025	bipatimonas
sp903845115	desuriforma
sp002314195	cilibilenta
sp001790095	rorifitrix
sp002171115	semoditoga
sp014490575	fumacitudo
sp903882335	dinupitas
sp903855135	denunitudo
sp900314705	fumifedo
sp001704065	recocitura
sp002351955	venucitas
sp002782675	monacatica
sp902776835	demadimonia
sp009698575	manubilenta
sp002112385	mahemisca
sp002405165	divulilenta
sp002494015	cicilousia
sp001821765	metabentia
sp000425985	mirabousia
sp002408465	dilacitura
sp002793215	ludifetta
sp002350805	decapugo
sp013361335	saxifibula
sp002771035	defanastra
sp003133125	decomitas
sp903951825	bicapedo
sp002251385	voragitrix
sp000437795	codifousia
sp900019985	fidenugo
sp002415085	tametiforma
sp002491165	conigastra
sp903904835	seroticella
sp001632165	bigematica
sp903899015	cerofifica
sp014200275	vinulatica
sp001800315	resupibra
sp903835255	decacessa
sp002391185	devecisca
sp001689685	ciminitrix
sp002412425	nocenago
sp001774685	cohonatica
sp003537285	turibedo
sp002792735	ludimugo
sp002742445	nugigitia
sp900107995	refulitura
sp902586125	pedepago
sp001917115	mavoricula
sp900465675	penicitas
sp009843635	visibitrix
sp001871195	tegimax
sp903872075	subadetta
sp903839085	cululiforma
sp002480935	turicessa
sp002439585	detotibula
sp002439805	bimotimonas
sp902596665	videlibula
sp900142465	refunitia
sp900313335	sicarilega
sp000952175	risibentia
sp903840505	recumicula
sp003531665	solifivita
sp007136095	dirititia
sp000436835	funivetta
sp903859715	revecatica
sp002316015	meridago
sp002365325	penecilega
sp003220315	bovicifica
sp903843135	holisousia
sp002013465	cuferitrix
sp000436615	licenatica
sp900318905	malogiforma
sp001789205	laxititura
sp003242895	cerevessa
sp001916135	decacigena
sp903884815	vinolicella
sp003086775	labecitudo
sp002160815	favonedo
sp900066145	monimimonas
sp900109515	cemenitica
sp001874005	susicousia
sp000369525	fatifitrix
sp903825895	forabastra
sp003212795	forabatica
sp900468805	regigatica
sp902787335	renavivita
sp002695025	regigigena
sp001304935	mirabimonas
sp903826715	buxificula
sp903832875	repudivita
sp900546115	turicitia
sp003535455	cenacibra
sp902775475	mimogitia
sp002383685	depacibra
sp900319365	nicotax
sp902561765	femelimonas
sp902614235	vitigilenta
sp003290225	desucifica
sp003132505	documax
sp000195975	capilago
sp001788295	cohoricula
sp001914955	xeramicella
sp003159355	herinetta
sp002694825	tegumimonia
sp000013205	documibula
sp903960945	socagilega
sp002782605	duricicella
sp009840385	detumedo
sp003509765	monogatica
sp900320435	loripax
sp902620455	navifugo
sp001587175	cadurilenta
sp903879915	lanifilenta
sp002348615	laculitrix
sp903955385	nugacedo
sp002453155	catapicula
sp001791325	giganastra
sp902788605	semilugo
sp900314655	momoressa
sp002783105	bonitago
sp903905505	sicaritrix
sp003210095	cerebousia
sp903929795	dilacitrix
sp002358615	cuferimonas
sp002387725	siticitia
sp900318265	remuledo
sp903871775	benepibra
sp007122335	hirunitura
sp903896675	conibetta
sp900013535	metabitrix
sp002721995	redacilenta
sp900316325	hegumisca
sp903859365	genufastra
sp000772045	vitifetta
sp000092885	bigemibula
sp001777515	rosaricella
sp902613845	desonago
sp003437035	reduvatio
sp903863015	monodilega
sp007135385	verecitoga
sp002316795	dececitia
sp003211555	decativita
sp900315975	penecigena
sp002387605	parocentia
sp903886255	bimetitudo
sp000634735	pavicitio
sp001294645	catapatica
sp903923905	detepugo
sp903850885	palifedo
sp000681355	gabinicula
sp902567045	capilentia
sp000990325	dupunifica
sp002135245	caselousia
sp902787715	desonimonia
sp003167555	nocumessa
sp009838915	desepicula
sp903940225	cuferilega
sp009698045	cacalimonia
sp002452095	desomicella
sp002373675	devecicula
sp903839725	denicisca
sp002692525	mahelitia
sp903936565	supelibra
sp902518715	gemebivita
sp001758725	cibaritia
sp000995415	lanigitura
sp004017535	panifousia
sp900316815	musulitas
sp002780895	nehalitoga
sp001567485	vicecastra
sp009677585	detotifica
sp903915125	nutamitas
sp009838735	bicubicula
sp002477955	dehonisca
sp001626925	maheletta
sp002080455	penurisca
sp001789965	mirifilega
sp903921325	rarefitoga
sp002500665	conipetta
sp903865935	bovicivita
sp002404865	rosarimonas
sp002350105	lavacitas
sp903865035	bigemimonia
sp002408445	visocetta
sp900318045	decinitura
sp903953895	gasifitica
sp903825575	catafimonas
sp003139095	malivibra
sp903843045	viginilenta
sp003518365	demadentia
sp002737345	lapicimonia
sp011516635	lanifigena
sp900541745	dedigilenta
sp002480645	malogax
sp903827265	paropastra
sp903926855	derecilega
sp903910645	pedifitia
sp002789815	repuditoga
sp003416985	curacibra
sp000346225	ruricax
sp900466745	murelax
sp001821475	parocedo
sp001577025	defunitudo
sp900319905	milifitrix
sp903858085	turibiforma
sp004402235	pepenastra
sp900315435	denicicula
sp002453165	menapibra
sp003166375	bipenatica
sp903845455	tomogago
sp001320525	regigifica
sp003158395	holovisca
sp002843605	didacitio
sp001773215	volunicula
sp001777665	detorilega
sp002342705	humecilega
sp903863935	defenitoga
sp003132305	relenessa
sp002361215	vecorentia
sp903901225	codifisca
sp003519445	dicabicella
sp001553345	cacopiforma
sp002998355	retecifica
sp009729415	desomatio
sp903836265	luticilega
sp002432425	corocilega
sp900317515	paralicula
sp903939845	mutabessa
sp003952385	cocolatica
sp002367695	relenilenta
sp000417505	refunatica
sp002387615	bovicedo
sp001486445	malediforma
sp003116725	remulitura
sp002331105	pacifastra
sp903911355	dilacibula
sp903825395	nocumousia
sp002351705	cilibatica
sp003020075	ruricitudo
sp009840445	pedepitrix
sp903882665	bicapibula
sp000989765	lenunitrix
sp001773255	paraligena
sp002359975	nicomilega
sp001468395	saburitrix
sp002480925	funamitia
sp002418445	tumeficella
sp903827975	cepulibula
sp900116015	subodilega
sp002493945	nugivitudo
sp900066265	bicoritia
sp000187445	recometta
sp002329075	pedepedo
sp900317155	luceritas
sp001798075	locelitas
sp000152745	visocatica
sp900170025	monumimonas
sp000432355	cereventia
sp903930455	semipatica
sp001768325	homicax
sp903868455	venabitia
sp002407855	nefaretta
sp003481705	murilibra
sp002752165	cacometta
sp002328865	viripicella
sp001805445	ridibentia
sp002471575	pericentia
sp009844405	nocumitica
sp002863045	pabilentia
sp900315165	bipenousia
sp903825765	regigax
sp002692605	refacitia
sp001873105	metabiforma
sp001873625	tirunatio
sp000513935	colubitica
sp002321395	malivicula
sp005845265	tabifetta
sp003216195	detecicula
sp900316495	timefatio
sp900320585	repuribula
sp002473165	conibitio
sp003671075	dimidatio
sp003542575	delacessa
sp004362315	tolutitrix
sp001916075	denunitoga
sp903907995	catalicula
sp002342295	manupimonas
sp003134995	betacedo
sp903885795	gemebitrix
sp009729095	bipalimonia
sp002480495	latibivita
sp903848465	revecimonas
sp902535365	munifitica
sp903933805	documimonia
sp004551865	cetaritia
sp903890595	documicella
sp009700145	rosacilenta
sp903885195	fetulitoga
sp903832395	telegessa
sp001821155	refociforma
sp002335285	sifunivita
sp903884425	cinefibula
sp001796285	binocimonas
sp009391975	conubiforma
sp903917565	venucugo
sp900318215	defenousia
sp002398065	bifarentia
sp002161565	virecisca
sp900315345	conigitrix
sp004556755	letifatio
sp900066205	defetitrix
sp002694855	peripatica
sp900315285	maxumatio
sp002325375	navifigena
sp009726135	pavicugo
sp903835235	maxililega
sp903938935	caraventia
sp002348705	nucififica
sp002842515	menapitia
sp002358415	notabilenta
sp003162055	hexagivita
sp002438565	coticetta
sp900320965	pocilimonas
sp900318275	halucifica
sp001871515	cerarilenta
sp004402595	funivousia
sp007121335	milifitudo
sp000433635	fatifatio
sp001546855	cotenitoga
sp007134885	musulatica
sp903900705	rubefugo
sp903907745	telefifica
sp900314795	homunitrix
sp903860915	sonipitrix
sp009694435	curacastra
sp003280495	televitoga
sp003138795	ruricatio
sp003278845	rubicax
sp903902325	monacivita
sp003215175	sacopedo
sp001778985	colapessa
sp001791615	relenugo
sp003952465	macilimonas
sp002394335	famelitoga
sp902619265	lucifitio
sp003216375	monogatio
sp001802945	pimenicella
sp903857265	letififica
sp002328185	demigax
sp002345145	maxilimonia
sp002437495	domicigena
sp001782235	genufitrix
sp900315935	vinolatica
sp004292745	depecitia
sp902559035	cisalibula
sp001807205	modifilenta
sp003168355	cerevastra
sp902620785	holisitio
sp002849245	robigatica
sp001817065	gerunitio
sp000203975	gabinitio
sp002686885	bicalicula
sp900317405	butubedo
sp902576045	canacicula
sp900471515	notabibra
sp903858475	delacivita
sp900315695	manomigena
sp903822545	nefaribula
sp003209155	malagisca
sp900319185	nicotilenta
sp900319345	defulivita
sp903893815	fetutessa
sp903823115	cepulastra
sp002310075	tomogitudo
sp903831935	turifatio
sp001805205	monumilega
sp002396325	lapilitoga
sp902760345	pabililenta
sp004556155	badititudo
sp003470905	deculitas
sp001796335	denupigena
sp902623975	momorugo
sp900013425	sotulitrix
sp002293685	necubousia
sp903937835	cuferigena
sp000755535	robigitrix
sp009841475	pinacetta
sp002371265	colutax
sp002473085	bonifatio
sp002409965	genufimonas
sp903897475	citipitura
sp903945495	bimetigena
sp001780775	faticicella
sp003428805	valeficella
sp002471705	volunilenta
sp002409975	citipiforma
sp001794755	bifisitura
sp001613795	gasomicella
sp903915775	redacatica
sp902597895	defenax
sp002451695	molecax
sp902602185	rutabicula
sp903875215	futatitoga
sp903870175	rudicastra
sp002375995	paralatio
sp001001485	denomitudo
sp903823025	lenimitio
sp007134085	musuledo
sp000384155	fatilivita
sp001627655	vepalitudo
sp902794825	notabisca
sp009726125	fetutimonia
sp903901975	deparimonia
sp902791165	bipinimonas
sp002754355	femelisca
sp003213115	dedigibula
sp003045825	bicoredo
sp003139995	pocilatio
sp002698265	relecimonas
sp002350535	perexitia
sp002367415	denixivita
sp002371675	peradicula
sp002863145	minurago
sp003152695	munifessa
sp009840625	maligitia
sp001277295	roraricula
sp001029795	teleficula
sp004020105	buxifibula
sp903851135	monocisca
sp001771135	bacifilega
sp002281755	diludivita
sp007828215	denecago
sp003536295	siligicula
sp900318545	paracitrix
sp002281095	recogitrix
sp002771015	sacomitas
sp001794125	latibatica
sp007123065	delubilega
sp002718095	negotilenta
sp900320255	risibilega
sp002368665	hexapimonas
sp001789045	vicecousia
sp002937585	capabibula
sp001779315	genocifica
sp009696445	ceracifica
sp903887465	noviletta
sp000745015	dilibax
sp000432915	mirifentia
sp003154775	gabinitas
sp008633915	semodugo
sp001823095	lucubago
sp900316175	dicabivita
sp903827075	luculitoga
sp002966515	saxifitura
sp903935585	cacopax
sp002493965	catafimonia
sp900313845	deforicella
sp903831805	viburitudo
sp903899655	lanugimonia
sp002793115	modifentia
sp002836635	siminugo
sp900315745	supelentia
sp900552085	gerunilega
sp002849225	demadimonas
sp903844265	bimetimonas
sp002780795	canacivita
sp009698515	cineficella
sp013349995	cunabitura
sp001775555	defenatio
sp903958625	cosidisca
sp900318205	megalilenta
sp000497575	loraratio
sp007127255	ludibetta
sp003463205	repagedo
sp001790815	desurax
sp900315265	rinocessa
sp009840215	hexapessa
sp900113985	citocedo
sp903839695	sugilitudo
sp002393735	retecilega
sp002391385	delacifica
sp009840525	depetugo
sp003169895	nubecetta
sp000737575	cibarilega
sp001917125	bimotitio
sp001791305	regifessa
sp001629325	vehicitia
sp001788095	derecibula
sp004557855	catobago
sp900319575	mimogimonia
sp903826635	duponibra
sp011773845	vanidugo
sp002285285	taraxetta
sp902776365	hexamedo
sp004554455	denixessa
sp002413745	halucugo
sp900552665	pulegetta
sp900470195	bicodatio
sp903873655	maleditudo
sp900215325	homogax
sp001872735	devecatio
sp002774415	novilisca
sp002491635	papilousia
sp002701385	decunitura
sp002470275	fatifilenta
sp002737365	rubigitoga
sp001723685	denecastra
sp001821295	semililenta
sp903867305	relecitas
sp002723075	cohurilenta
sp002297045	bigementia
sp002349865	fetulimonia
sp900319705	refacousia
sp902587665	citocastra
sp903820955	metapitura
sp009701185	susicessa
sp002451465	hegumicula
sp903916195	pulegago
sp002791545	manufousia
sp013033515	vinulitia
sp002344975	relapitoga
sp902778935	peribilenta
sp003234085	resupatica
sp002440145	reduvitio
sp001652315	detumitas
sp005878835	cadavicula
sp001873465	penicisca
sp001905735	paropentia
sp903953455	lavacimonas
sp900142905	molecedo
sp903825465	ceracivita
sp900319855	molecicula
sp903838995	benevilenta
sp900315995	retunentia
sp903824045	fusificella
sp001792535	rubecitas
sp903868795	vanitilenta
sp007121775	nugacitura
sp002897635	refulilenta
sp001873285	pomifimonas
sp903994365	pericessa
sp903890485	senipastra
sp001805965	feficitrix
sp902585315	direcilenta
sp002297815	facunilenta
sp013623465	fatiledo
sp000155895	cobalibula
sp005887995	dicimitura
sp003278685	cerimitia
sp003134045	holovessa
sp900005815	cohoritio
sp002311275	depubitrix
sp001804915	volucax
sp003168215	gasifentia
sp000817085	demadicella
sp003478275	nefarax
sp903943955	fefelifica
sp002313635	rudecifica
sp903889425	semivilega
sp003134075	decomedo
sp900314945	peridatio
sp900319245	bonifilenta
sp003219415	satacentia
sp903959905	resuritio
sp900319885	devecousia
sp903896545	desuricula
sp007127235	cerucibula
sp002381185	pimenivita
sp002784245	domipimonas
sp903843705	dimadentia
sp001629395	ratifentia
sp900317065	hegumitura
sp001438005	decucugo
sp900318395	pinigentia
sp001797445	homolitudo
sp003280655	taraxax
sp903904755	domigitio
sp001821055	delebax
sp000991415	bimotessa
sp000995065	labecastra
sp900317375	defacastra
sp003138895	loraribula
sp900315205	resupago
sp003458415	megaliforma
sp902610995	subucitica
sp002382325	bicoritudo
sp900473805	codifilenta
sp900544115	demigicella
sp902519835	televago
sp002710515	notacilega
sp002165255	necopibula
sp003162335	bacifedo
sp002471865	relecessa
sp002409625	feditivita
sp902616725	homilitura
sp903919125	viragitoga
sp003331505	conabibula
sp903832635	rubefitoga
sp007125585	desupessa
sp002975405	fetifitura
sp001776545	volunisca
sp001872485	relecicella
sp002112505	derecatio
sp900316985	deparilenta
sp009922685	nimiritio
sp000523275	cohoribula
sp006658505	dilogago
sp002361155	feculitio
sp001667735	cepurimonia
sp009702045	biparitica
sp003212315	penicimonas
sp000435975	tirocibra
sp003506435	tametetta
sp002711365	funamitrix
sp903929845	pedifimonas
sp002724925	cenacibula
sp002367455	delebitia
sp013177295	debucisca
sp001824375	dilacilega
sp903935095	nubecivita
sp903919035	sonivibra
sp001917815	cosigibra
sp902761225	peradugo
sp009843915	cuticetta
sp012985465	cerevilenta
sp002422535	feditifica
sp900115435	relapitudo
sp001771575	disidivita
sp902629855	rosacessa
sp007125955	vecorilenta
sp007136405	locupousia
sp903884535	conarilega
sp903953805	vinolitudo
sp900320045	faticentia
sp903881505	legifitica
sp007018905	direcedo
sp002473395	delacedo
sp001002325	hexapibra
sp902546975	tegumivita
sp903835555	seleciforma
sp005809195	rutabitura
sp903860975	xenodifica
sp003524945	genufigena
sp002480565	seposicula
sp903825315	rudicetta
sp902597545	bifaricella
sp002335115	homagibra
sp002161085	catobilenta
sp010030605	colimago
sp002403305	bicapitura
sp003053605	monocago
sp004331115	xenopifica
sp903823565	monimilenta
sp002414385	lucelentia
sp000980375	decenifica
sp003520745	perexax
sp002491305	lenocibula
sp002479145	lenimitica
sp012033205	deciticula
sp001821135	satacicella
sp003218135	purulitura
sp009700815	dilibifica
sp003568415	tetenitica
sp003150615	corociforma
sp001774075	curotitrix
sp003506385	defanitio
sp900315755	diritilega
sp003134765	pedepitas
sp002113295	sicunitrix
sp003510135	dinupessa
sp009841145	delapousia
sp000285855	senipibra
sp002937455	culibessa
sp903929485	siminitia
sp002306815	camilicella
sp002350355	negotitrix
sp001829315	refulugo
sp900066645	catilisca
sp903839515	conamitio
sp001580195	caravitrix
sp002427105	turiciforma
sp902602415	lenunitio
sp903933815	pepenentia
sp002314145	habacicula
sp003002025	delecitas
sp002378565	coticimonia
sp000283515	dehisatica
sp902512305	dilicitudo
sp002361615	vinoliforma
sp004293365	colipugo
sp002313925	cemenitrix
sp013166545	facunitoga
sp011523655	linigitica
sp903918335	rinocicella
sp002396605	dilacitica
sp903849185	catafibula
sp903891095	nugigago
sp003132265	catalimonas
sp002161525	homagousia
sp903920145	homilago
sp012371325	deculessa
sp900112855	labecitio
sp903918645	saburitica
sp003053685	tabitifica
sp900320455	cimitivita
sp001701165	cohoriforma
sp002449665	vecorimonia
sp000431075	ceromatica
sp002472915	cuferitudo
sp900321445	laxititudo
sp009699205	venunibra
sp003220615	volunitas
sp007136425	manufitoga
sp002788805	decamessa
sp903871235	murilatica
sp002329125	genufessa
sp900321425	relecisca
sp003567395	peradetta
sp903855705	funivitrix
sp007124535	catagax
sp003141195	saxopimonas
sp007129495	rorifitas
sp900313905	tirunax
sp003486385	socagugo
sp903882935	lupanitica
sp902518505	depopastra
sp003471585	cicilessa
sp001917775	vacilimonia
sp903827955	dilemibula
sp000302535	depetilenta
sp002292265	rudecibra
sp902506165	molecibula
sp900315595	negotitio
sp000701725	hibisessa
sp903835685	bicorilega
sp903895725	tenemastra
sp903894295	manubiforma
sp000063525	tumefivita
sp002892445	dececastra
sp903861645	fatilicula
sp902616245	gasificula
sp002683975	decitibula
sp014229345	femelatica
sp903840435	camilatica
sp002439095	dicanitio
sp001805105	saxifitoga
sp903864185	reforentia
sp900316965	dehisitrix
sp900315735	denigibula
sp005881295	vehemastra
sp903924205	pudibifica
sp002423965	penicicella
sp903875575	depicatio
sp007129255	refacilenta
sp900066555	levidimonia
sp007120035	solipago
sp903857255	decititoga
sp002343985	lugubessa
sp903821745	levifilenta
sp002684115	xeropousia
sp902536405	famelatio
sp903889795	conifitoga
sp903885605	nugacitoga
sp004283055	telegibula
sp002167555	peridilega
sp001793155	vagabimonia
sp009698675	robigessa
sp003522105	decamitio
sp002449395	navicitica
sp900104795	revulastra
sp903870275	benivitio
sp903910555	coturitura
sp001634775	nefarentia
sp000226255	turifastra
sp903919715	disidentia
sp002531955	sicinentia
sp000800925	fiducicula
sp001871075	ridibiforma
sp002780915	depasedo
sp000436075	televitio
sp002840735	tibicilega
sp002898675	mirifitudo
sp000769715	devecigena
sp902596325	tirunilega
sp900318615	gemebatica
sp002342255	curabicella
sp002708845	bucolatio
sp002361955	cibarisca
sp002491065	buxanousia
sp903958565	periditoga
sp903843235	colubago
sp900555995	tirocitio
sp002254365	desomastra
sp004558825	velivousia
sp001799565	fetutibra
sp902594705	ratifitia
sp002436185	detenivita
sp002477505	furibastra
sp004166885	detumilega
sp002294285	negidicella
sp900546535	totidessa
sp903851035	celumitio
sp003545565	regififica
sp903877885	delecitura
sp001427125	saxifentia
sp005883115	tomogitio
sp903851045	diminitas
sp003139615	fiducitica
sp900321585	dicimessa
sp900317675	vilipibula
sp903845465	sacopatio
sp002724355	vanititio
sp003167215	malagentia
sp900320095	catiledo
sp003164675	defunitica
sp003053665	codifentia
sp003556225	hirudax
sp000170915	cerifitica
sp900465605	cemenibula
sp002402585	munifitas
sp903920865	subofetta
sp002210345	dilogiforma
sp002376725	carucentia
sp000435175	recumilega
sp903918885	debucetta
sp003162695	vehemitio
sp000992345	didacedo
sp903929185	repepitura
sp003554105	bigarifica
sp903913965	recucimonas
sp002470835	delebatio
sp007123975	recoretta
sp001789695	cacopitrix
sp003446665	depacicella
sp003135455	tumefatica
sp011301115	hecatimonia
sp002422785	celamibula
sp002685535	denupibula
sp903836325	demaditura
sp002363545	luticimonas
sp903832085	cicatitas
sp002784365	mirifitura
sp902776665	cerofilenta
sp000374905	dilicentia
sp900546545	melilessa
sp001567175	desomitudo
sp902555585	pericitrix
sp002491605	pinifatio
sp002407645	sarabilenta
sp902729355	rudicifica
sp900315585	buxifitoga
sp003217895	denicatica
sp903860745	capudago
sp002431345	cerarimonia
sp003567475	hecatiforma
sp903898675	linigigena
sp002420305	monopibula
sp903863395	depasatio
sp002338335	lanifitas
sp001801425	volubicula
sp005792145	nubecessa
sp902765625	catocitia
sp001919195	habacitica
sp001916835	megalibula
sp903878475	tenementia
sp002431965	vicatousia
sp013276795	peraditrix
sp001705835	depicousia
sp903887325	benemedo
sp000745055	faticitia
sp001595385	peridicella
sp002712055	semifimonia
sp903840375	divulitoga
sp000770645	cicilentia
sp900319105	delebitas
sp900320285	menapitrix
sp009842645	salubedo
sp903900265	vicatugo
sp010023085	denomilega
sp005790505	defesetta
sp002839335	notabentia
sp001424705	roraratica
sp009836625	rurigousia
sp003164135	documago
sp002404155	nefanugo
sp002396625	faticicula
sp001557535	conopimonas
sp002259405	minagicella
sp000508985	defosiforma
sp903861145	satacax
sp003451515	defulitoga
sp009702245	calipessa
sp903824665	denigivita
sp002712005	dilemisca
sp902771735	cacopedo
sp009928125	bimetessa
sp001974855	cinefisca
sp002451085	faticitudo
sp003554005	fatifessa
sp900315505	pavicitudo
sp903926385	cobalicella
sp903933125	catafifica
sp903902855	pepenilenta
sp903895475	depicimonia
sp903895845	cisoratio
sp903873775	siligitia
sp003561515	lucubitas
sp000510725	devecax
sp903959115	nugacugo
sp002361355	rurigicula
sp002434045	cilotitrix
sp011772275	detotousia
sp000376345	resupibula
sp900316015	resurago
sp902579105	semipetta
sp903862155	peradimonia
sp903909015	rorarigena
sp903936705	haricessa
sp902785575	derunax
sp903934875	pepenatio
sp003139695	bucelisca
sp001768235	peracitio
sp002297365	fatifugo
sp001421165	munifitudo
sp001767855	carunentia
sp000991575	nocumifica
sp002790655	siligago
sp002348265	lapilastra
sp001401805	tigurastra
sp000435815	rinocousia
sp004556965	catobessa
sp002929435	televilega
sp001438925	denicibula
sp007097285	desoritrix
sp002471845	legifago
sp006228005	codifetta
sp005798825	faticax
sp001769805	duponitudo
sp001785195	visifitia
sp903898215	serotiforma
sp900321525	dehinibra
sp903946935	visibimonas
sp003259585	pocilimonia
sp903908065	capucousia
sp002353575	culilicella
sp902597675	dilacilenta
sp903875445	letifessa
sp900314375	defalibra
sp002782865	papavigena
sp002362105	fecunatica
sp002477665	dilacitio
sp003135135	terebatio
sp002789895	camilitura
sp001828605	bicipatica
sp009993045	desonousia
sp005881335	culigetta
sp007123465	conamimonia
sp902613185	visibetta
sp903954165	metucilenta
sp002399235	betacugo
sp903938735	curacicula
sp002361175	depelatio
sp002731735	buxifitia
sp009841165	refunilega
sp009841005	nugigimonia
sp900078745	socagessa
sp903870685	legififica
sp001423335	fidenitoga
sp903853385	deniximonia
sp902776645	cohorigena
sp002727235	defacessa
sp002706685	semibimonia
sp002686685	penurastra
sp900128535	podagugo
sp013336725	sifunetta
sp903863195	subucivita
sp903940425	tetenitio
sp903932695	figiligena
sp003480255	democago
sp001816475	murilimonia
sp000437395	hegumago
sp002782365	decinitio
sp002336485	satacetta
sp903847975	defetetta
sp000334405	cinefimonas
sp003138515	tenemitudo
sp903894145	defacimonia
sp004556705	manibicula
sp003531585	viginentia
sp009837395	vicatago
sp903879985	colepicella
sp902362275	risibitas
sp900318445	supelousia
sp002714785	semibedo
sp002712065	miracitrix
sp002494215	volubitudo
sp002350765	capucicula
sp002863125	retecax
sp002979535	nugigimonas
sp000435555	depeliforma
sp002298335	labecitica
sp001769275	defesicula
sp900321005	decatitas
sp900315705	sotulilega
sp903905335	bipeniforma
sp003218975	resurastra
sp003139795	vicatitica
sp003151475	nubigitia
sp002733705	mahelibula
sp900321035	semapilenta
sp902586435	maligessa
sp903854725	petulentia
sp002418865	purulitica
sp005791875	sonivifica
sp903875275	sonipibra
sp903902915	catobetta
sp002369315	desorigena
sp002350465	dedigitas
sp002278925	telegetta
sp903928225	vicatitrix
sp004556165	depecilega
sp001795735	totidiforma
sp002103105	giganatica
sp903844115	delebilenta
sp001916965	detecitas
sp002344005	murelifica
sp000230675	levidax
sp902801885	bimotitoga
sp003158295	monimago
sp002551815	holovicella
sp903872785	bucoliforma
sp001770955	nicoticella
sp900315675	coturax
sp001873565	metabitudo
sp002743335	conigatica
sp009392785	dicibilega
sp001002285	cacopimonas
sp003465825	conipitica
sp000434995	murelivita
sp002350845	dapifitica
sp900321845	paropimonas
sp002373205	nugigilega
sp003477405	recucitoga
sp902785805	terebitio
sp900079735	conifastra
sp900317885	loripitura
sp000426785	seposimonia
sp003284215	vehicatio
sp900316585	cerevicula
sp002135205	culilitas
sp000431435	nubigimonia
sp003136495	dimacibra
sp902553145	feculatio
sp005882135	tetenousia
sp009795805	nehalitrix
sp003158745	vinacibra
sp903846075	celamugo
sp003161955	biparatica
sp007134865	sonivax
sp000410515	defasax
sp903957365	licenifica
sp903916325	subabitudo
sp902790905	ficedimonas
sp900320245	vaniditia
sp003153505	lucelilega
sp903954185	telegibra
sp900321835	cinipastra
sp013366925	redunedo
sp903828515	cicilax
sp003225295	benepetta
sp009838975	papilitio
sp009937185	malagago
sp900318775	rudicitudo
sp004519405	vocifetta
sp000432195	meridatica
sp903954055	depetibra
sp900552195	canacitia
sp903889245	cobalitudo
sp903903975	reduvatica
sp002427465	conipitoga
sp001423295	cepuricella
sp903898335	volucisca
sp903863845	turilibula
sp000177015	retunitica
sp903828235	fusifessa
sp007118765	bipinitica
sp900539695	bicoribula
sp903840015	tirunitio
sp902558645	socagitas
sp000999025	fefelibra
sp903918315	desupugo
sp903831455	dicanago
sp005881715	cohoribra
sp002939385	capucentia
sp003952485	codifatio
sp001918155	dapifousia
sp902547955	rudicisca
sp900066985	divolimonas
sp002790095	maxilibula
sp900315015	semigatica
sp003561595	culigicula
sp013349825	culilivita
sp002772455	repudiforma
sp001297065	subucatio
sp903821335	debucugo
sp903873485	direpicella
sp014207255	cicaritoga
sp900596015	ludimisca
sp002327725	rorulilenta
sp001784115	duponago
sp003487265	cosigetta
sp002918705	repecago
sp007131295	hecatitura
sp002294185	reforimonas
sp000434315	secunivita
sp902780535	vinuledo
sp001873945	megalilega
sp002358165	saxifitica
sp003169975	maxumimonas
sp903865705	volubivita
sp000635015	curacimonas
sp903873565	dinupax
sp903836285	cadavisca
sp010029945	fiducitudo
sp002335175	sarabitica
sp001872605	remulibra
sp903893975	siligilega
sp002372855	semilicula
sp902540985	visifitica
sp007134225	relecilenta
sp002299265	benepifica
sp001779115	rinocibra
sp902563105	catobimonia
sp003752615	bigarago
sp900318245	papavax
sp001767955	serotedo
sp001819605	levidibra
sp009842205	lutulitica
sp002979655	manubax
sp003282985	biparimonas
sp903862935	conopivita
sp007120695	cicatibra
sp001543345	derelilenta
sp002831585	gemebibra
sp903824455	cilicitrix
sp900313615	derelousia
sp000762975	peracitia
sp903862955	buxanivita
sp900105245	sacomibra
sp001770205	milifitio
sp004791255	diponivita
sp900319225	funivatica
sp903956835	cetaritas
sp009835985	revecitura
sp001780035	bicodilenta
sp002433805	melilitoga
sp000177555	cululitrix
sp001822065	pudibastra
sp002450165	nutamentia
sp001567425	defenimonas
sp001689575	diludastra
sp903829565	homulimonia
sp900315765	fetifessa
sp903896745	malogivita
sp900291975	furibatica
sp003280995	papavousia
sp001820685	devecitia
sp001667275	linigimonas
sp900066055	dedigicella
sp900110055	codifilega
sp001780285	hibisicula
sp902580215	venucicula
sp001797335	solaciforma
sp001771505	cicilifica
sp001916855	casigitio
sp903939555	papililega
sp001772865	redacitoga
sp002862275	butubimonia
sp001864895	revuliforma
sp903899845	biparousia
sp001776775	monimitas
sp903834515	deparetta
sp000431535	denicimonia
sp903925955	benepago
sp007121115	lenocitudo
sp003134685	detepilega
sp002259415	repuratio
[truncated: 29,072 more rows]

## Sheet: unused archaeal genus names
Revularcha
Genocarcha
Miliparcha
Rutabarcha
Verifarcha
Semimarcha
Vinolarcha
Colutarcha
Noninarcha
Semodarcha
Denuparcha
Detunarcha
Resuparcha
Repecarcha
Dicabarcha
Siticarcha
Catalarcha
Bacifarcha
Feditarcha
Linigarcha
Culibarcha
Nugigarcha
Culilarcha
Monogarcha
Rorararcha
Venucarcha
Penecarcha
Dilecarcha
Dapifarcha
Malogarcha
Nefararcha
Cisorarcha
Gabinarcha
Desularcha
Denecarcha
Retunarcha
Fetularcha
Depetarcha
Perexarcha
Demigarcha
Monocarcha
Defasarcha
Cosigarcha
Cocodarcha
Penurarcha
Bigararcha
Bipalarcha
Daducarcha
Depararcha
Canacarcha
Docibarcha
Recomarcha
Locuparcha
Brasmarcha
Prosparcha
Arillarcha
Adremarcha
Igniparcha
Invigarcha
Inmolarcha
Abnocarcha
Absegarcha
Acrotarcha
Adtorarcha
Incunarcha
Assubarcha
Isoscarcha
Alcedarcha
Adposarcha
Abrelarcha
Adalgarcha
Allubarcha
Invecarcha
Crupparcha
Adluvarcha
Exorbarcha
Immadarcha
Intemarcha
Adcesarcha
Ignomarcha
Octiparcha
Advecarcha
Adsocarcha
Infisarcha
Allobarcha
Impilarcha
Occalarcha
Exoscarcha
Apperarcha
Adsibarcha
Octobarcha
Exturarcha
Adsusarcha
Ignosarcha
Avuncarcha
Ampenarcha
Expisarcha
Alsularcha
Actararcha
Antacarcha
Ecastarcha
Impigarcha
Acrolarcha
Utrararcha
Procrarcha
Fragmarcha
Offularcha
Arcelarcha
Octusarcha
Extiparcha
Crabrarcha
Adtumarcha
Adpugarcha
Adsifarcha
Apsocarcha
Apograrcha
Agratarcha
Alsisarcha
Accumarcha
Immemarcha
Immatarcha
Incorarcha
Obfirarcha
Exsufarcha
Scintarcha
Apsolarcha
Asbesarcha
Utralarcha
Anagnarcha
Alembarcha
Illunarcha
Attesarcha
Anxifarcha
Infacarcha
Ensifarcha
Pluscarcha
Adpecarcha
Infucarcha
Insorarcha
Oblocarcha
Arcitarcha
Expalarcha
Brabrarcha
Altivarcha
Ambadarcha
Oratrarcha
Chalbarcha
Enceparcha
Agnomarcha
Argitarcha
Argimarcha
Oppanarcha
Inmodarcha
Prodrarcha
Inhosarcha
Attegarcha
Ambifarcha
Irrefarcha
Adnumarcha
Spastarcha
Aminnarcha
Omninarcha
Abascarcha
Acrocarcha
Alsidarcha
Exsolarcha
Exhilarcha
Artoparcha
Anastarcha
Infabarcha
Exorcarcha
Arrugarcha
Epiclarcha
Adsucarcha
Algebarcha
Omnigarcha
Arbavarcha
Advigarcha
Excularcha
Inadfarcha
Admigarcha
Proslarcha
Excetarcha
Obtunarcha
Abverarcha
Accenarcha
Immobarcha
Inpurarcha
Ambusarcha
Oblonarcha
Insicarcha
Inregarcha
Chancarcha
Arcatarcha
Effacarcha
Extunarcha
Affunarcha
Ammurarcha
Intorarcha
Adsecarcha
Adsicarcha
Assefarcha
Induparcha
Inbecarcha
Inordarcha
Effunarcha
Apsimarcha
Innuparcha
Epistarcha
Alluvarcha
Obambarcha
Epogdarcha
Indirarcha
Exhedarcha
Antegarcha
Obfenarcha
Impolarcha
Abrumarcha
Arrecarcha
Infesarcha
Abinvarcha
Occucarcha
Amnenarcha
Impacarcha
Omnivarcha
Inseparcha
Inhonarcha
Expecarcha
Inargarcha
Adfirarcha
Accucarcha
Infelarcha
Exsuparcha
Irremarcha
Agnicarcha
Inrefarcha
Adaggarcha
Adtilarcha
Adambarcha
Plascarcha
Adpagarcha
Indifarcha
Inmutarcha
Intacarcha
Inmacarcha
Enimvarcha
Alectarcha
Ignicarcha
Adfabarcha
Utrolarcha
Errabarcha
Impinarcha
Orgetarcha
Inobrarcha
Obverarcha
Innoxarcha
Anamnarcha
Artufarcha
Arcebarcha
Problarcha
Obfusarcha
Infinarcha
Inpelarcha
Elliparcha
Accularcha
Inmenarcha
Enuclarcha
Ensicarcha
Admutarcha
Inergarcha
Utricarcha
Inoffarcha
Ecliparcha
Anciparcha
Acratarcha
Adrotarcha
Exurrarcha
Atricarcha
Obsatarcha
Excocarcha
Attolarcha
Adnicarcha
Oblanarcha
Ambidarcha
Appagarcha
Proclarcha
Emortarcha
Oscilarcha
Irregarcha
Opuscarcha
Inasparcha
Armicarcha
Infunarcha
Infirarcha
Ephemarcha
Adpicarcha
Essonarcha
Acistarcha
Induvarcha
Adlacarcha
Inexparcha
Ableparcha
Insusarcha
Indubarcha
Egregarcha
Indilarcha
Altifarcha
Practarcha
Abnorarcha
Immacarcha
Innasarcha
Apsegarcha
Affamarcha
Adcogarcha
Ammularcha
Oblivarcha
Effosarcha
Abligarcha
Obtemarcha
Ocissarcha
Inleparcha
Addivarcha
Incucarcha
Adtacarcha
Expurarcha
Inoblarcha
Invicarcha
Impudarcha
Innumarcha
Immurarcha
Incularcha
Adlocarcha
Atlanarcha
Adrumarcha
Incocarcha
Aclasarcha
Inobsarcha
Anaplarcha
Odollarcha
Utputarcha
Aseptarcha
Adcucarcha
Adsenarcha
Excogarcha
Alcibarcha
Occenarcha
Idipsarcha
Adessarcha
Opporarcha
Assibarcha
Cnestarcha
Obmurarcha
Ellebarcha
Myalgarcha
Adfularcha
Ignifarcha
Scorbarcha
Ornitarcha
Inhumarcha
Irredarcha
Adnecarcha
Intesarcha
Altiparcha
Ectenarcha
Inretarcha
Inreparcha
Adselarcha
Assicarcha
Ontolarcha
Episcarcha
Adporarcha
Exsatarcha
Adgesarcha
Exadvarcha
Ignigarcha
Exhorarcha
Effararcha
Inpudarcha
Extorarcha
Inaccarcha
Troclarcha
Arancarcha
Inabrarcha
Imbecarcha
Adpelarcha
Inardarcha
Innabarcha
Obvalarcha
Aprugarcha
Adhorarcha
Invorarcha
Crusmarcha
Affanarcha
Obnunarcha
Invesarcha
Insomarcha
Inpenarcha
Epicrarcha
Adcelarcha
Adpacarcha
Adgubarcha
Everbarcha
Inambarcha
Acrobarcha
Apsurarcha
Infatarcha
Exsanarcha
Anarrarcha
Aneclarcha
Insenarcha
Antecarcha
Amercarcha
Obnuparcha
Inrevarcha
Inlecarcha
Arrabarcha
Arnacarcha
Obsurarcha
Appugarcha
Agriparcha
Acontarcha
Invinarcha
Chernarcha
Exentarcha
Infanarcha
Adtagarcha
Invetarcha
Accogarcha
Inlusarcha
Arusparcha
Blactarcha
Inrecarcha
Assifarcha
Adtemarcha
Agrimarcha
Thapsarcha
Indiparcha
Admodarcha
Insalarcha
Inlaparcha
Allaparcha
Adsesarcha
Inpinarcha
Eclecarcha
Grallarcha
Triscarcha
Adtolarcha
Ermelarcha
Enhararcha
Anatrarcha
Ablacarcha
Ossucarcha
Intamarcha
Adnularcha
Ascelarcha
Acricarcha
Fraglarcha
Insoparcha
Inabsarcha
Amatrarcha
Adverarcha
Occumarcha
Adcumarcha
Elastarcha
Advinarcha
Frigdarcha
Plostarcha
Ecfunarcha
Ambecarcha
Arciparcha
Abreparcha
Enuntarcha
Protrarcha
Indeparcha
Armidarcha
Encolarcha
Insubarcha
Obsecarcha
Indecarcha
Inhorarcha
Optumarcha
Astaparcha
Impavarcha
Anaclarcha
Adperarcha
Antefarcha
Antevarcha
Armifarcha
Adcularcha
Urbicarcha
Undevarcha
Apsenarcha
Astiparcha
Inurbarcha
Excomarcha
Adnararcha
Encenarcha
Omniparcha
Accaparcha
Antomarcha
Expanarcha
Adnilarcha
Inmorarcha
Appacarcha
Irradarcha
Expasarcha
Alticarcha
Obnoxarcha
Inremarcha
Admurarcha
Ascenarcha
Eviscarcha
Exaggarcha
Abpatarcha
Irrevarcha
Andabarcha
Ammatarcha
Adsigarcha
Innecarcha
Adsularcha
Ephiparcha
Algifarcha
Adpanarcha
Almitarcha
Octinarcha
Extinarcha
Escularcha
Ammodarcha
Advorarcha
Antiparcha
Acustarcha
Unetvarcha
Ecfacarcha
Inresarcha
Exforarcha
Ingurarcha
Assudarcha
Apoplarcha
Alcalarcha
Actutarcha
Oblucarcha
Inmobarcha
Echidarcha
Atrusarcha
Edissarcha
Artifarcha
Excararcha
Prograrcha
Acrimarcha
Aphorarcha
Adcomarcha
Triclarcha
Attemarcha
Aggenarcha
Adlenarcha
Entomarcha
Accerarcha
Indevarcha
Avoncarcha
Inlacarcha
Immedarcha
Imbelarcha
Ossifarcha
Adlubarcha
Inforarcha
Anactarcha
Uxorcarcha
Admorarcha
Edulcarcha
Embamarcha
Insinarcha
Almucarcha
Adoscarcha
Irrelarcha
Arvecarcha
Apsorarcha
Abindarcha
Ossararcha
Scaccarcha
Prognarcha
Incivarcha
Affabarcha
Evangarcha
Eccisarcha
Illeparcha
Effinarcha
Stercarcha
Agravarcha
Abhinarcha
Inbelarcha
Emancarcha
Adbelarcha
Octoparcha
Indivarcha
Tranvarcha
Accomarcha
Adsudarcha
Aggesarcha
Absurarcha
Epigrarcha
Adnunarcha
Annifarcha
Ammixarcha
Abneparcha
Incesarcha
Artilarcha
Aphararcha
Illibarcha
Insufarcha
Excamarcha
Inperarcha
Estovarcha
Inturarcha
Angiparcha
Obrigarcha
Adlicarcha
Apporarcha
Eccilarcha
Odontarcha
Aggubarcha
Smegmarcha
Excalarcha
Absocarcha
Enigmarcha
Adpinarcha
Acroparcha
Exsorarcha
Ambacarcha
Encomarcha
Affularcha
Excanarcha
Inconarcha
Idcirarcha
Adhosarcha
Opercarcha
Amfitarcha
Advicarcha
Aprararcha
Addubarcha
Tribrarcha
Abambarcha
Obsorarcha
Energarcha
Irrotarcha
Obtenarcha
Utpotarcha
Tresvarcha
Expenarcha
Irrecarcha
Adrecarcha
Immusarcha
Exherarcha
Inredarcha
Exhonarcha
Scammarcha
Ecligarcha
Alismarcha
Ascalarcha
Adtesarcha
Octuparcha
Insurarcha
Adtenarcha
Asporarcha
Aplesarcha
Absorarcha
Ascisarcha
Adfanarcha
Clancarcha
Ensigarcha
Sceptarcha
Thessarcha
Exsusarcha
Insibarcha
Aglasarcha
Obvolarcha
Intenarcha
Epitrarcha
Inherarcha
Inexsarcha
Adnubarcha
Ininnarcha
Affirarcha
Infenarcha
Immigarcha
Inmitarcha
Inlocarcha
Impugarcha
Aspilarcha
Exasparcha
Arcubarcha
Istinarcha
Inexcarcha
Indidarcha
Ingigarcha
Antirarcha
Excinarcha
Albogarcha
Ulcisarcha
Apercarcha
Acrufarcha
Expugarcha
Obtecarcha
Attorarcha
Obtorarcha
Indomarcha
Antimarcha
Exsomarcha
Effularcha
Ignobarcha
Exsisarcha
Octodarcha
Innularcha
Echogarcha
Adlaparcha
Abantarcha
Omnifarcha
Inornarcha
Adpenarcha
Ammigarcha
Offirarcha
Arcifarcha
Excorarcha
Afranarcha
Intabarcha
Arundarcha
Effigarcha
Anteparcha
Armigarcha
Utrinarcha
Attubarcha
Incenarcha
Omnimarcha
Illaparcha
Inoccarcha
Ecneparcha
Abagmarcha
Adhinarcha
Illuvarcha
Inrelarcha
Proscarcha
Adfamarcha
Abmatarcha
Atroparcha
Obtesarcha
Excucarcha
Attelarcha
Admularcha
Expoparcha
Utillarcha
Aciscarcha
Uberrarcha
Annucarcha
Onocrarcha
Impirarcha
Artolarcha
Artocarcha
Adneparcha
Indotarcha
Intecarcha
Annicarcha
Amnigarcha
Adordarcha
Octacarcha
Appicarcha
Adgenarcha
Excerarcha
Anancarcha
Adtubarcha
Arnogarcha
Inlibarcha
Annubarcha
Allacarcha
Adobrarcha
Inpasarcha
Armiparcha
Immodarcha
Inhabarcha
Endivarcha
Obsolarcha
Acertarcha
Effemarcha
Assucarcha
Aterrarcha
Insemarcha
Incomarcha
Scellarcha
Inlumarcha
Obmutarcha
Aprucarcha
Oppugarcha
Crastarcha
Acrifarcha
Obsigarcha
Accorarcha
Adrenarcha
Offunarcha
Exsurarcha
Adinvarcha
Appecarcha
Inmemarcha
Egritarcha
Optabarcha
Intolarcha
Abluvarcha
Apposarcha
Allibarcha
Ardifarcha
Anceparcha
Pragmarcha
Adcubarcha
Agraparcha
Agricarcha
Adfunarcha
Ineffarcha
Adlecarcha
Proprarcha
Annecarcha
Scombarcha
Arremarcha
Ossicarcha
Umbilarcha
Exindarcha
Argumarcha

## Sheet:  unused bac genus names
Brabraria
Argitana
Artolia
Scaccella
Ammurula
Adlecana
Plascia
Inhosia
Actutula
Stercella
Utillula
Practana
Frigdula
Chancosa
Exorcana
Exsufana
Apsimella
Ecfacana
Innulosa
Inlumana
Advinosa
Adgesida
Anatrosa
Intemana
Adlubaria
Andabosa
Excocia
Absurella
Inrelia
Immatida
Infiria
Extorida
Excocaria
Adlacosa
Ephemosa
Offunia
Arrabia
Oblivida
Insusosa
Exsomosa
Utillia
Adremia
Adgubia
Affamana
Insemosa
Inredaria
Octupida
Immodula
Apsorula
Adinvosa
Antegaria
Asporula
Acrotula
Assucida
Indiparia
Ambacida
Adbelida
Ingurula
Advigosa
Chancula
Spastana
Infesia
Errabella
Addubella
Antipula
Acontaria
Antepana
Obvalosa
Exherida
Oppugaria
Inardana
Adrecida
Adlaparia
Insicosa
Obnupella
Inardosa
Isoscula
Inmorula
Exentia
Ambecana
Alembana
Antipella
Invorida
Insemida
Adnulula
Accogia
Accapula
Appecosa
Scombida
Inlibella
Annubana
Adcucosa
Actarana
Effinana
Obmuraria
Irredosa
Adcelia
Omnigida
Expurella
Inresana
Incunida
Altipana
Enharana
Insopella
Inforia
Assibella
Insalaria
Adcesula
Insorida
Abreparia
Insusia
Immodosa
Adnularia
Armifia
Adpagosa
Expurida
Scammana
Excorula
Adhosia
Exoscula
Ambusosa
Ocissana
Ephiposa
Advigaria
Effemida
Exherana
Ectenella
Eccisella
Ossifosa
Proslula
Abagmula
Asbesaria
Impigula
Arillosa
Argitia
Armifosa
Assicaria
Obambana
Aspilana
Antefia
Pluscia
Octinosa
Excaria
Agrapana
Astiparia
Adalgula
Oblonella
Obnoxella
Adlubula
Octiposa
Adfirula
Alcedella
Amfitaria
Octuparia
Expuria
Antepella
Adpacida
Expisia
Ensicaria
Armidosa
Obtecia
Inperia
Spastosa
Advigula
Adessana
Ensicella
Ecfacula
Apperaria
Exaggana
Adtolosa
Adculia
Ammuraria
Inherella
Atricana
Triscosa
Annicaria
Adnunella
Odontana
Arrecana
Effacosa
Occucia
Insinida
Omnimida
Ammataria
Adcumana
Inoblana
Imbelosa
Adhinella
Agripana
Blactula
Adtilana
Attubella
Obsatosa
Exsupida
Offulosa
Inpenida
Inrepida
Excorosa
Inlepana
Scintaria
Andabella
Arvecella
Echidida
Insubaria
Exsania
Armipula
Crabria
Irregaria
Agnomaria
Irremosa
Adnicia
Apharula
Excinula
Excarana
Abrelaria
Adpinaria
Attubana
Astaposa
Astapana
Irrefula
Obtecaria
Innecida
Infesana
Admurella
Alsisula
Scorbia
Adsibula
Adsecosa
Adpicella
Inpudosa
Admoria
Inabrella
Inrepia
Adcogosa
Admodula
Adinvia
Amatrida
Ampenula
Incocaria
Anactula
Ingigia
Prograna
Ecnepula
Triclella
Adtesosa
Expalula
Inobsia
Inornana
Extipula
Exsorosa
Proclida
Adcelida
Acculella
Aprucosa
Inbecida
Opporia
Tresvana
Excucosa
Egregula
Encolula
Adgenella
Asbesosa
Irradosa
Utpotia
Acontula
Absurana
Accularia
Adlocana
Insufia
Arcifella
Astipella
Inheria
Oblocosa
Utralaria
Inmutella
Uxorcana
Alluvana
Addivula
Acricella
Ecfacella
Appicaria
Immadida
Immadaria
Adtagia
Arnacula
Aggubana
Inoffia
Exindaria
Obtemana
Induvida
Abnepella
Epiclia
Anastia
Arremia
Adnulida
Abrelana
Ammulosa
Effosia
Adsesida
Adnubula
Accorida
Egritida
Alcedula
Ambifana
Acertia
Effemosa
Expecida
Incomida
Inmacia
Inpenella
Abnocosa
Exsusella
Adcomaria
Excalella
Oblanella
Endivana
Indirida
Protrida
Omnimaria
Alluvella
Inmenia
Arcelida
Affunula
Aplesula
Aseptida
Amercula
Inobsella
Insibia
Adsusida
Extunosa
Inmodaria
Accomaria
Enimvosa
Ornitaria
Arcifula
Inabrida
Affulella
Abrumula
Enuntosa
Affania
Insorosa
Acrolosa
Omnigella
Arbavosa
Ossucosa
Infatia
Adsudula
Adfabida
Chalbula
Brasmula
Ossifella
Chernella
Exsupella
Adcubia
Artocida
Exoscella
Abrepella
Irrevella
Ignomula
Ornitula
Plascosa
Apposia
Aggesana
Excerida
Octusana
Invetaria
Inhabula
Infacaria
Ascalana
Enimvella
Extorula
Arancella
Attesia
Indifia
Intabana
Obveria
Antefula
Exsorida
Agnicella
Ossucula
Inhosella
Exsorella
Actutaria
Arnacella
Addubaria
Attelida
Adobria
Embamula
Oblania
Adfunaria
Ignifosa
Adtenida
Encomula
Eviscosa
Episcella
Echogella
Blactaria
Agratia
Obfenana
Immobosa
Ambacosa
Inobsida
Immataria
Oblocula
Annifaria
Argimia
Obverida
Obtoraria
Excogosa
Inambella
Everbula
Ensicana
Alticana
Offulana
Ignigula
Occenia
Chernaria
Immedida
Idcirula
Octacaria
Affabia
Exurrella
Aprarana
Abascella
Adalgida
Almucana
Ossucaria
Exhonula
Inobsana
Accogella
Adnunula
Adlocia
Epogdana
Epistella
Irregula
Assifia
Occenana
Optumana
Intenosa
Impirana
Thapsosa
Fraglida
Apporaria
Irradella
Adpenida
Exhedida
Innabida
Actutana
Adinvana
Optabella
Ignicaria
Artilosa
Obsurana
Alcedaria
Adcelella
Stercana
Proslida
Aclasana
Adsudaria
Intenaria
Adlenida
Abrelella
Extinida
Opporana
Obambaria
Ambidia
Adpagella
Ablacaria
Appagana
Artufana
Octupana
Anancosa
Ecneparia
Plostana
Inremaria
Adfunula
Exsupia
Acrifaria
Alticida
Apsorella
Induparia
Appagaria
Effinula
Affanula
Invorosa
Adpugosa
Inurbella
Artifula
Offulula
Obtemula
Impacida
Expecula
Insopana
Ammixana
Obverosa
Adsucia
Effigana
Adnilella
Urbicosa
Acustia
Aprugana
Pragmia
Exsurosa
Thessaria
Ammulula
Abveraria
Expenana
Adtenana
Adgesana
Adnepida
Eclipida
Adsibosa
Inculosa
Stercida
Invigana
Octusia
Extunida
Odollula
Adfamia
Abascula
Inoffella
Inpasula
Irrelana
Indecella
Extinana
Procrella
Ellebia
Apharosa
Allacida
Incocella
Artopula
Oblonida
Obfiria
Attegana
Adpelula
Almucula
Immadella
Adsesia
Albogula
Tranvana
Invesula
Inabsida
Indotosa
Expanida
Indevia
Excucaria
Obsorana
Adfunana
Adremana
Pluscana
Ambidula
Absorida
Alcibula
Inexcida
Oratrula
Esculosa
Adlubosa
Immedaria
Blactana
Exhonana
Acrimula
Adpugaria
Aruspia
Obfenida
Atricella
Adtoraria
Annicana
Alsularia
Estovula
Inexposa
Fraglaria
Abluvula
Incesida
Adnecula
Inleparia
Orgetia
Onocrana
Offiria
Obtenana
Odollida
Illibaria
Ephemida
Scorbosa
Allacana
Elliposa
Ossicaria
Almitana
Adverula
Arcelella
Advicia
Excogula
Impiria
Everbida
Ecliparia
Inculula
Arrabida
Imbelaria
Omnipula
Episcula
Ancipida
Incomella
Adgubosa
Expanula
Istinosa
Artolida
Intacula
Admigosa
Attelaria
Adordana
Affamida
Octobosa
Incunosa
Inlumida
Obmutosa
Abmatia
Inpelosa
Altiparia
Obmuria
Abpataria
Inurbula
Oppugula
Ermelula
Arcitana
Aggubula
Adfabaria
Adremida
Ephipula
Adpecaria
Abinvula
Adsusana
Invetosa
Arcatida
Expalana
Insoria
Immurula
Arancula
Utputosa
Exentosa
Inretella
Adrumella
Intesana
Aspilosa
Expisana
Acratosa
Irregella
Inexsosa
Ellebida
Irrelida
Adcumia
Excoraria
Avuncida
Adpososa
Occenella
Impolosa
Alsidella
Indipana
Enuclana
Adinvaria
Incocosa
Arremula
Incocida
Indotella
Admoraria
Inrevella
Obfiraria
Adcubana
Obnunida
Acropella
Exsomella
Arusposa
Impacula
Adpanosa
Inoblida
Eviscia
Adalgosa
Idcirosa
Innulida
Abpatella
Apograna
Insubida
Infesaria
Inconosa
Immusana
Exsolia
Assefula
Innecosa
Plascana
Adtemaria
Anamnaria
Obtesella
Adnarana
Altifia
Assibula
Omnifia
Inpelida
Obtesula
Ossarana
Exoscosa
Arcitosa
Obtecosa
Ascisida
Occucula
Inargosa
Acrotaria
Exurrula
Algebia
Altifaria
Arbavula
Adcelula
Offiraria
Encomaria
Expasia
Triscana
Embamaria
Apperosa
Inreposa
Proslaria
Illuvana
Adporosa
Obsurella
Attemia
Altifula
Utrolosa
Invorella
Arnacaria
Adtolia
Intabella
Anagnida
Inculella
Almitia
Agnicaria
Obsecella
Abligana
Ecligida
Utrararia
Impirida
Inhosana
Inrefia
Emancella
Adnilosa
Attorula
Octobia
Inordida
Alismula
Artilia
Arvecaria
Exsisida
Acropida
Scellula
Immigosa
Incorella
Inturida
Adgesosa
Utralella
Inmodosa
Arancosa
Brabrella
Incivosa
Ignipia
Exsusosa
Inculana
Adtorana
Enuclaria
Abantella
Obsecula
Irradida
Omnimula
Inargula
Indomana
Aplesella
Tribrula
Induposa
Immacia
Abluvella
Undevaria
Amatrosa
Obsecosa
Affulula
Exsatella
Adoscosa
Abneposa
Adpinida
Expuraria
Agnomida
Exadvula
Epicrella
Uberria
Intoraria
Assifana
Adfulida
Obvalida
Immusosa
Infacia
Accomula
Immusida
Inrecella
Inredula
Umbilella
Opuscaria
Attoraria
Apogria
Enuclia
Aciscia
Opuscana
Optumaria
Annifia
Exaggia
Inabsana
Attegella
Adsifella
Adcelaria
Blactida
Adlicula
Anamnida
Adnilia
Adtacaria
Cnestia
Aprugosa
Acontella
Antimula
Infacida
Admutula
Exsusula
Immadosa
Adsudella
Adpagula
Inseparia
Chalbaria
Armipella
Crabrella
Isoscana
Adalgana
Ignobana
Obfusula
Arcebosa
Errabida
Infucida
Antecaria
Inmacida
Antecia
Expecaria
Apoplella
Omnifosa
Ecfacida
Expugia
Utrolida
Ocissula
Excogaria
Impilaria
Abrumaria
Adcomia
Infelula
Inlecula
Exorcosa
Exsufella
Exasparia
Anaclula
Invesia
Adlacaria
Aprugia
Antefida
Infelella
Inreparia
Adrenosa
Anaplana
Inremia
Prosposa
Excogella
Inlapida
Antirula
Irrelia
Obsorella
Inlacida
Exhorosa
Innuparia
Eccisaria
Appagula
Avoncana
Inmemella
Inhoria
Exturida
Affulia
Argimella
Adnicella
Crabrana
Atrusia
Acratida
Adneposa
Aciscida
Aneclella
Altipida
Impudula
Eviscella
Scammida
Arcubula
Insepia
Invinula
Brasmosa
Adsulia
Inforida
Apercosa
Insemaria
Abnoraria
Inpurula
Inhabana
Adcucia
Excocella
Arcatia
Inmutosa
Istinida
Utpotosa
Innecana
Eviscula
Adambaria
Excocana
Plostaria
Effacella
Intorana
Obtunana
Troclosa
Inmobula
Enimvia
Irrefella
Inobria
Alsidia
Unetvana
Assubula
Apogrosa
Arnacosa
Assicana
Adtacula
Armicaria
Adrotida
Invicana
Admigula
Adporia
Immuraria
Indubula
Proprosa
Incorana
Innumosa
Exaspia
Arremaria
Innoxosa
Annifida
Infucula
Exsatana
Anxifosa
Adperella
Adtesula
Acrifosa
Inpenula
Aplesaria
Idipsella
Adhosula
Aggesida
Insorella
Aspilella
Inhorella
Epistida
Assubida
Expecosa
Adhinula
Antacella
Arcipida
Abambosa
Excamia
Admorula
Immurana
Proscana
Adselula
Ineffaria
Proclaria
Indifula
Infucosa
Affanana
Accucosa
Alcibaria
Adpagia
Arcelula
Enharella
Acrocaria
Affanosa
Adgesia
Intolula
Ignicosa
Immatella
Indecana
Ammigia
Admutaria
Fragmella
Myalgida
Impolaria
Brasmia
Ocissida
Aprarella
Excucana
Octobaria
Immedula
Absurosa
Inexpula
Adgesaria
Exsurella
Progrella
Prognaria
Innulia
Adporaria
Accenella
Amatrella
Undevia
Illibella
Irrecaria
Anactosa
Inoffida
Adnilana
Infunia
Adpanana
Advigana
Adtumella
Offirida
Enigmana
Elliparia
Admodia
Amfitella
Epigria
Sceptia
Artifana
Obsurida
Exaspana
Inresia
Assifella
Optumia
Inabria
Aseptaria
Adcubella
Ignicula
Induvia
Insicaria
Epistosa
Adfanella
Enigmaria
Acculida
Abmatula
Ellipella
Abluvana
Alluvaria
Immacida
Armifaria
Impirula
Invesella
Utrinida
Ornitana
Evangida
Irredula
Obfusia
Egritia
Arnogaria
Illapana
Aphararia
Optabosa
Aggesula
Extoria
Ulcisida
Admuria
Adpecosa
Indipella
Procrosa
Ensicosa
Adrumia
Obsuraria
Infisula
Artoparia
Adambana
Exhonida
Ossarella
Allubaria
Artufula
Abverosa
Inherana
Epicrula
Proscosa
Infenana
Octodia
Indevella
Inpudella
Acratella
Idipsia
Afranana
Excalana
Absorella
Inardia
Exsufida
Adluvia
Effulana
Absocana
Indilosa
Offirula
Inlocida
Acropula
Innumia
Obvalella
Immusaria
Irradaria
Inconida
Exhedaria
Assicia
Illepia
Inlacosa
Acricaria
Admorosa
Inmitosa
Adsifosa
Inpudula
Apporia
Excomula
Intemida
Armigana
Acrifia
Inresula
Inoffosa
Adcumella
Adnumana
Alcedida
Adbelia
Inurbosa
Ocissaria
Accenana
Encolella
Aphorosa
Spastida
Attesana
Abluvaria
Antacaria
Adnarella
Excomana
Incularia
Assibana
Adfulella
Obsatula
Ignobaria
Antecosa
Expasella
Armicana
Adtacida
Tranvosa
Ermelella
Irregia
Inlacella
Optabula
Intorosa
Adrotaria
Intemia
Anatrida
Edulcula
Arcatula
Arundida
Infinia
Assudana
Inmemula
Agrimaria
Agrimosa
Ineffia
Absegida
Plascaria
Adalgaria
Adsucella
Ectenida
Abmatella
Adtenosa
Expugana
Alembaria
Affamaria
Advecula
Infisana
Tribrella
Adpugida
Adoscaria
Opercosa
Inhabia
Omninana
Adposia
Affabaria
Alsulana
Ambifella
Escularia
Exherula
Affunida
Scorbella
Adpacia
Inmemia
Assubia
Accucida
Incenosa
Obsataria
Acratula
Intabaria
Antomella
Adnulana
Octipida
Frigdana
Advorana
Adessia
Exorcia
Accaposa
Ensicia
Ingigaria
Inretia
Adsudosa
Adsulida
Epogdosa
Argimana
Ammixaria
Offunosa
Actutosa
Astapida
Episcana
Artifella
Excalida
Apsimula
Eclipana
Inoblaria
Adoscula
Insenella
Echogosa
Extinula
Oblanosa
Insicella
Impilula
Occalosa
Adtoria
Exindula
Expurana
Amnenella
Insorana
Octoparia
Affulida
Ascelosa
Advecaria
Excamula
Edissula
Agricida
Prodrella
Inlocula
Affunia
Octopella
Utralana
Frigdida
Adsesaria
Oblonosa
Clancida
Alismana
Atrusaria
Infatosa
Ammuria
Assucosa
Intenana
Ecastida
Adnepana
Almitida
Adsecana
Adcesaria
Innoxana
Insicula
Adpacula
Effosida
Aminnida
Adtenaria
Adnecia
Utputia
Adnepula
Atlanosa
Algifella
Uberrosa
Innoxella
Impigida
Ascalula
Invetia
Excetosa
Andabida
Arcubana
Arnogosa
Adpicida
Artocana
Stercia
Arvecana
Incesula
Infanella
Crusmida
Abligosa
Epitrella
Clancosa
Scaccula
Acrimella
Ignifella
Aphorana
Orgetida
Errabana
Practaria
Aprucella
Echidaria
Adbelana
Atlanella
Immigula
Aseptia
Incesia
Exsoraria
Ambacia
Anactia
Octobida
Exoscida
Attemella
Abagmella
Omnipia
Ensicula
Antefella
Apoplia
Expania
Obvolaria
Innupella
Invesida
Atroparia
Aphorula
Illapida
Exsupula
Omnifella
Adnubia
Innumula
Prospia
Invorula
Echidella
Allubia
Abpatida
Adverana
Adtolaria
Omnifaria
Agnomia
Incenula
Actutia
Expugaria
Pragmula
Exforana
Eclecosa
Anaplida
Arnogia
Invesana
Aglasida
Adluvula
Anastana
Clancella
Optumida
Inpinia
Ignobia
Abnorana
Inredida
Encomosa
Crupparia
Acertella
Inmorana
Adlenia
Adlenella
Prodria
Insenaria
Infatida

[truncated: 4 more sheets: unused species epithets, 42,451 named bacterial taxa, 2,774 named archaeal taxa, Sheet1]
