# Supplementary material for: Naming the Unnamed: Over 45,000 Candidatus Names for Unnamed Archaea and Bacteria in the Genome Taxonomy Database
Source: Preprints.org preprint supplement (doi:10.20944/preprints202111.0557.v1), 2021-11-30
Supplement: Supplementary file 3 [file TableS2.xlsx]

## Sheet: new bacterial taxon names
New taxon name	GTDB r202 placeholder alphanumeric
Candidatus Bicoriota phyl. nov.	B130-G9
Candidatus Bifisiota phyl. nov.	GCA-001730085
Candidatus Casigariota phyl. nov.	UBA9089
Candidatus Ceracanota phyl. nov.	T1Sed10-126
Candidatus Cibaranota phyl. nov.	DUMJ01
Candidatus Ciminosota phyl. nov.	ARS69
Candidatus Cinipanota phyl. nov.	SLNR01
Candidatus Cocibosota phyl. nov.	CG2-30-53-67
Candidatus Colepanota phyl. nov.	CG2-30-70-394
Candidatus Conipanota phyl. nov.	JABMQX01
Candidatus Culilariota phyl. nov.	UBA8481
Candidatus Cululellota phyl. nov.	JACIXR01
Candidatus Cululosota phyl. nov.	FEN-1099
Candidatus Decunulota phyl. nov.	QNDG01
Candidatus Defacidota phyl. nov.	CLD3
Candidatus Defarosota phyl. nov.	DTU030
Candidatus Deforanota phyl. nov.	CAIJMQ01
Candidatus Dehinanota phyl. nov.	OLB16
Candidatus Desonellota phyl. nov.	AABM5-125-24
Candidatus Domigosota phyl. nov.	UBA10199
Candidatus Feditulota phyl. nov.	SM23-31
Candidatus Foricariota phyl. nov.	RUG730
Candidatus Funamanota phyl. nov.	UBA2233
Candidatus Lanifulota phyl. nov.	4572-55
Candidatus Laxitanota phyl. nov.	CG03
Candidatus Lenunidota phyl. nov.	CSSED10-310
Candidatus Levifellota phyl. nov.	SpSt-1050
Candidatus Minagiota phyl. nov.	CSP1-3
Candidatus Musulosota phyl. nov.	J088
Candidatus Nicotellota phyl. nov.	SpSt-318
Candidatus Relapellota phyl. nov.	BMS3Abin14
Candidatus Resuliota phyl. nov.	RBG-13-66-14
Candidatus Rinocanota phyl. nov.	SZUA-182
Candidatus Rubefidota phyl. nov.	JABDJQ01
Candidatus Satacellota phyl. nov.	DQWO01
Candidatus Semimosota phyl. nov.	DSWW01
Candidatus Semunulota phyl. nov.	UBA6262
Candidatus Subadanota phyl. nov.	T1SED10-198M
Candidatus Televariota phyl. nov.	SpSt-956
Candidatus Venunellota phyl. nov.	UBA3054
Candidatus Volubiota phyl. nov.	RBG-13-61-14
Candidatus Bacifariae class. nov.	B143-G9
Candidatus Baropanae class. nov.	HRBIN17
Candidatus Bicoriae class. nov.	B130-G9
Candidatus Bifisiae class. nov.	GCA-001730085
Candidatus Bigariae class. nov.	SORT01
Candidatus Bipatariae class. nov.	DTLF01
Candidatus Bipenariae class. nov.	SYMT01
Candidatus Bipenidae class. nov.	MVCY01
Candidatus Bipinariae class. nov.	SZUA-365
Candidatus Bisacosae class. nov.	UBA4738
Candidatus Bucolariae class. nov.	UBA5435
Candidatus Bulapidae class. nov.	UBA12135
Candidatus Buxanosae class. nov.	BMS3BBIN04
Candidatus Buxifiae class. nov.	UBA9160
Candidatus Cacopiae class. nov.	DTOL01
Candidatus Capucariae class. nov.	UBA9980
Candidatus Caselidae class. nov.	UBA1177
Candidatus Casigariae class. nov.	UBA9089
Candidatus Cataganae class. nov.	E44-bin39
Candidatus Cenobidae class. nov.	DTXE01
Candidatus Cenodiae class. nov.	OXYB2-FULL-49-7
Candidatus Ceracanae class. nov.	T1Sed10-126
Candidatus Ceracosae class. nov.	Mor1
Candidatus Cerarariae class. nov.	DTU065
Candidatus Ceruciae class. nov.	SLGR01
Candidatus Cetarariae class. nov.	4484-213
Candidatus Cetariae class. nov.	DTU015
Candidatus Chernanae class. nov.	Palsa-1180
Candidatus Cibaranae class. nov.	DUMJ01
Candidatus Cilotulae class. nov.	WYAZ01
Candidatus Cimelidae class. nov.	SOKK01
Candidatus Ciminosae class. nov.	ARS69
Candidatus Cinipanae class. nov.	SLNR01
Candidatus Cisorariae class. nov.	UBA11346
Candidatus Citipariae class. nov.	XYA12-FULL-58-9
Candidatus Cocibosae class. nov.	CG2-30-53-67
Candidatus Cocodariae class. nov.	JAAXHH01
Candidatus Colepanae class. nov.	CG2-30-70-394
Candidatus Colepidae class. nov.	O2-12-FULL-43-9
Candidatus Colimanae class. nov.	DTPJ01
Candidatus Colimellae class. nov.	UBA7883
Candidatus Colipiae class. nov.	SURF-26
Candidatus Colipulae class. nov.	FW602-bin22
Candidatus Conifellae class. nov.	UBA1144
Candidatus Conipanae class. nov.	JABMQX01
Candidatus Cosididae class. nov.	JAAXVQ01
Candidatus Culilariae class. nov.	UBA8481
Candidatus Cululanae class. nov.	UBA5301
Candidatus Cululellae class. nov.	JACIXR01
Candidatus Cululosae class. nov.	FEN-1099
Candidatus Curabanae class. nov.	UBA4802
Candidatus Decinulae class. nov.	PGYV01
Candidatus Decitellae class. nov.	Kazan-3B-28
Candidatus Decomariae class. nov.	UBA8108
Candidatus Decomulae class. nov.	UBA6911
Candidatus Decunulae class. nov.	QNDG01
Candidatus Defacidae class. nov.	CLD3
Candidatus Defarosae class. nov.	DTU030
Candidatus Deforanae class. nov.	CAIJMQ01
Candidatus Dehinanae class. nov.	OLB16
Candidatus Dehisanae class. nov.	GBS-1
Candidatus Dehonellae class. nov.	UBA994
Candidatus Dehonosae class. nov.	JABMPQ01
Candidatus Delapellae class. nov.	4484-211
Candidatus Demogosae class. nov.	UBA8477
Candidatus Denaviae class. nov.	UBA2428
Candidatus Denicidae class. nov.	UBA6624
Candidatus Denigellae class. nov.	CAIWXX01
Candidatus Denupanae class. nov.	SICC01
Candidatus Depicariae class. nov.	GCA-2792135
Candidatus Depupiae class. nov.	RBG-16-64-22
Candidatus Desonellae class. nov.	AABM5-125-24
Candidatus Desulidae class. nov.	JdFR-97
Candidatus Desuposae class. nov.	GCA-2686955
Candidatus Detoridae class. nov.	JABDET01
Candidatus Detotulae class. nov.	QYQD01
Candidatus Didacellae class. nov.	UBA1135
Candidatus Didaciae class. nov.	UBA8919
Candidatus Diminidae class. nov.	UBA5214
Candidatus Disidariae class. nov.	UBA1551
Candidatus Divolellae class. nov.	UBA5177
Candidatus Domigosae class. nov.	UBA10199
Candidatus Doxolariae class. nov.	UBA6077
Candidatus Ducilanae class. nov.	GWA2-38-11
Candidatus Fecunulae class. nov.	SURF-5
Candidatus Feditulae class. nov.	SM23-31
Candidatus Fetifosae class. nov.	MHYJ01
Candidatus Ficedosae class. nov.	JACMRA01
Candidatus Fidenariae class. nov.	UBA4092
Candidatus Foricariae class. nov.	RUG730
Candidatus Forinosae class. nov.	SM23-61
Candidatus Fuliganae class. nov.	UBA3569
Candidatus Fuligosae class. nov.	B26-G2
Candidatus Funamanae class. nov.	UBA2233
Candidatus Furibidae class. nov.	UBA6266
Candidatus Gasifiae class. nov.	32-111
Candidatus Gemebosae class. nov.	UBA9088
Candidatus Habaculae class. nov.	JABMRZ01
Candidatus Hexagellae class. nov.	SBBH01
Candidatus Hirudulae class. nov.	UBA6099
Candidatus Homunariae class. nov.	B129-G9
Candidatus Lacinanae class. nov.	UBA4882
Candidatus Lanifulae class. nov.	4572-55
Candidatus Lapilanae class. nov.	D2-FULL-39-29
Candidatus Lavacosae class. nov.	B3-LCP
Candidatus Laxitanae class. nov.	CG03
Candidatus Lenocellae class. nov.	B62-G9
Candidatus Lenunidae class. nov.	CSSED10-310
Candidatus Levifellae class. nov.	SpSt-1050
Candidatus Loripariae class. nov.	SURF-8
Candidatus Medimellae class. nov.	UBA2968
Candidatus Melilanae class. nov.	UBA796
Candidatus Menapellae class. nov.	SDB-A
Candidatus Menapidae class. nov.	B3-B38
Candidatus Milipellae class. nov.	4484-113
Candidatus Mimogellae class. nov.	UBA5359
Candidatus Minagiae class. nov.	CSP1-3
Candidatus Mirabulae class. nov.	UBA7526
Candidatus Monocellae class. nov.	UBA9087
Candidatus Morigosae class. nov.	UBA3073
Candidatus Musulosae class. nov.	J088
Candidatus Navifanae class. nov.	B64-G9
Candidatus Navifidae class. nov.	UBA6919
Candidatus Nefaridae class. nov.	UBA4820
Candidatus Nicotellae class. nov.	SpSt-318
Candidatus Niteliae class. nov.	Ch29
Candidatus Nivomanae class. nov.	CG2-30-40-21
Candidatus Nocumidae class. nov.	CAIYQO01
Candidatus Panifidae class. nov.	UBA1384
Candidatus Pepenellae class. nov.	YA12-FULL-61-11
Candidatus Peradosae class. nov.	UBA6777
Candidatus Purulanae class. nov.	J132
Candidatus Recuciae class. nov.	UBA2361
Candidatus Relapellae class. nov.	BMS3Abin14
Candidatus Remedanae class. nov.	E44-bin80
Candidatus Renavosae class. nov.	UBA2214
Candidatus Repaganae class. nov.	HRBIN16
Candidatus Repuranae class. nov.	2-12-FULL-62-27
Candidatus Resalulae class. nov.	UBA10988
Candidatus Resuliae class. nov.	RBG-13-66-14
Candidatus Revecariae class. nov.	UBA4055
Candidatus Revecidae class. nov.	SLMV01
Candidatus Ridibellae class. nov.	UBA1439
Candidatus Rinocanae class. nov.	SZUA-182
Candidatus Risibanae class. nov.	2-12-FULL-45-22
Candidatus Rorulosae class. nov.	DG-23
Candidatus Rosacidae class. nov.	UBA11872
Candidatus Rubefellae class. nov.	UBA6191
Candidatus Rubefidae class. nov.	JABDJQ01
Candidatus Rubigariae class. nov.	UBA9042
Candidatus Rutabariae class. nov.	JAADFL01
Candidatus Salubiae class. nov.	RBG-13-55-18
Candidatus Sanabidae class. nov.	PUNC01
Candidatus Satacellae class. nov.	DQWO01
Candidatus Saxifidae class. nov.	RPQS01
Candidatus Semimosae class. nov.	DSWW01
Candidatus Semodulae class. nov.	UBA8468
Candidatus Semunellae class. nov.	UBA2242
Candidatus Semunulae class. nov.	UBA6262
Candidatus Siminiae class. nov.	HRBIN11
Candidatus Siteliae class. nov.	PUPC01
Candidatus Siticiae class. nov.	J058
Candidatus Sonabellae class. nov.	DTU084
Candidatus Sonabidae class. nov.	RBG-16-71-46
Candidatus Sonivellae class. nov.	DUMD01
Candidatus Subadanae class. nov.	T1SED10-198M
Candidatus Susicellae class. nov.	UBA5829
Candidatus Tabifellae class. nov.	GWC2-55-46
Candidatus Tabitanae class. nov.	JABWAT01
Candidatus Tametanae class. nov.	CG2-30-54-11
Candidatus Televariae class. nov.	SpSt-956
Candidatus Tenemanae class. nov.	GWE2-31-10
Candidatus Timefulae class. nov.	UBA1414
Candidatus Tomogosae class. nov.	UBA3072
Candidatus Tumefidae class. nov.	UBA890
Candidatus Turifosae class. nov.	UBA8248
Candidatus Vagabanae class. nov.	UBA10030
Candidatus Vecorulae class. nov.	UBA4733
Candidatus Vehemidae class. nov.	UBA6098
Candidatus Venunellae class. nov.	UBA3054
Candidatus Viburellae class. nov.	DTGP01
Candidatus Viripanae class. nov.	SZUA-567
Candidatus Vitifariae class. nov.	TC1
Candidatus Vivifidae class. nov.	UBA9942
Candidatus Volubiae class. nov.	RBG-13-61-14
Candidatus Volucosae class. nov.	UBA9217
Candidatus Xeroposae class. nov.	UBA2394
Candidatus Antegiales ord. nov.	Palsa-1295
Candidatus Appugulales ord. nov.	Fen-727
Candidatus Bacifariales ord. nov.	B143-G9
Candidatus Baditanales ord. nov.	21-64-14
Candidatus Baditariales ord. nov.	UBA6952
Candidatus Baropanales ord. nov.	HRBIN17
Candidatus Beneposales ord. nov.	Bin18
Candidatus Benividales ord. nov.	SHWA01
Candidatus Bicinariales ord. nov.	SpSt-225
Candidatus Bicipellales ord. nov.	UBA3495
Candidatus Bicoriales ord. nov.	B130-G9
Candidatus Bicoridales ord. nov.	UBA7694
Candidatus Bifarosales ord. nov.	WRCU01
Candidatus Bifisiales ord. nov.	GCA-001730085
Candidatus Bifisidales ord. nov.	SBBB01
Candidatus Bigariales ord. nov.	SORT01
Candidatus Bigemiales ord. nov.	UBA6126
Candidatus Bigemosales ord. nov.	CAILAD01
Candidatus Bimetanales ord. nov.	JGIOTU-2
Candidatus Bimetellales ord. nov.	HGM11514
Candidatus Bimotariales ord. nov.	JABMQE01
Candidatus Bipalanales ord. nov.	Palsa-1439
Candidatus Biparidales ord. nov.	JABMRJ01
Candidatus Bipatariales ord. nov.	DTLF01
Candidatus Bipenariales ord. nov.	SYMT01
Candidatus Bipenidales ord. nov.	MVCY01
Candidatus Bipinariales ord. nov.	SZUA-365
Candidatus Bisacosales ord. nov.	UBA4738
Candidatus Bisulariales ord. nov.	CADAWZ01
Candidatus Bisulellales ord. nov.	JAAYKL01
Candidatus Biveriales ord. nov.	RGZZ01
Candidatus Bonitanales ord. nov.	B3-G13
Candidatus Bovicidales ord. nov.	4572-78
Candidatus Bucelellales ord. nov.	GWA2-58-10
Candidatus Bucelosales ord. nov.	SHYB01
Candidatus Bucelulales ord. nov.	DTJE01
Candidatus Bucolariales ord. nov.	UBA5435
Candidatus Bucolosales ord. nov.	BM507
Candidatus Bucolulales ord. nov.	UBA1400
Candidatus Bugilellales ord. nov.	UBA3567
Candidatus Bulapidales ord. nov.	UBA12135
Candidatus Buxananales ord. nov.	MWCZ01
Candidatus Buxanosales ord. nov.	BMS3BBIN04
Candidatus Buxifiales ord. nov.	UBA9160
Candidatus Cacomariales ord. nov.	UBA1845
Candidatus Cacomellales ord. nov.	GM7ARS4
Candidatus Cacopiales ord. nov.	DTOL01
Candidatus Cadurellales ord. nov.	Ga0077560
Candidatus Cadurosales ord. nov.	WSZJ01
Candidatus Calipellales ord. nov.	UBA2247
Candidatus Calipidales ord. nov.	UBA817
Candidatus Calipulales ord. nov.	VXMN01
Candidatus Capabulales ord. nov.	GCA-2746255
Candidatus Capilidales ord. nov.	JABDLF01
Candidatus Capucariales ord. nov.	UBA9980
Candidatus Capucosales ord. nov.	UBA2199
Candidatus Caravulales ord. nov.	CAIMUX01
Candidatus Carucellales ord. nov.	UBA1151
Candidatus Carunanales ord. nov.	SZUA-229
Candidatus Casabellales ord. nov.	SZUA-149
Candidatus Caselidales ord. nov.	UBA1177
Candidatus Caselosales ord. nov.	4484-93
Candidatus Casigariales ord. nov.	UBA9089
Candidatus Casigiales ord. nov.	CG2-30-33-46
Candidatus Casigosales ord. nov.	UBA9968
Candidatus Cataganales ord. nov.	E44-bin39
Candidatus Catagidales ord. nov.	SW-4-49-11
Candidatus Cataliales ord. nov.	SLMS01
Candidatus Catalidales ord. nov.	SpSt-223
Candidatus Categanales ord. nov.	2-12-FULL-49-11
Candidatus Categulales ord. nov.	JABDJR01
Candidatus Catilidales ord. nov.	PLA2
Candidatus Catobanales ord. nov.	CAISOG01
Candidatus Celamanales ord. nov.	SZUA-252
Candidatus Celamariales ord. nov.	SPLOWO2-01-44-7
Candidatus Celamellales ord. nov.	B48-G9
Candidatus Celamulales ord. nov.	DTOW01
Candidatus Celumariales ord. nov.	DTKO01
Candidatus Cenobellales ord. nov.	UBA4142
Candidatus Cenobidales ord. nov.	DTXE01
Candidatus Cenodiales ord. nov.	OXYB2-FULL-49-7
Candidatus Cenodosales ord. nov.	F11
Candidatus Cenodulales ord. nov.	2-02-FULL-51-18
Candidatus Cenotosales ord. nov.	SHVR01
Candidatus Ceracanales ord. nov.	T1Sed10-126
Candidatus Ceracosales ord. nov.	Mor1
Candidatus Cerarariales ord. nov.	DTU065
Candidatus Ceraridales ord. nov.	SBBL01
Candidatus Cerimariales ord. nov.	9FT-COMBO-42-15
Candidatus Cerucellales ord. nov.	JAAYSF01
Candidatus Ceruciales ord. nov.	SLGR01
Candidatus Cetarariales ord. nov.	4484-213
Candidatus Chernanales ord. nov.	Palsa-1180
Candidatus Cibaranales ord. nov.	DUMJ01
Candidatus Cibarariales ord. nov.	1-14-0-20-64-10
Candidatus Cicariales ord. nov.	JACNKJ01
Candidatus Cicatosales ord. nov.	UBA8231
Candidatus Cicilidales ord. nov.	SpSt-313
Candidatus Cilotiales ord. nov.	4484-107
Candidatus Cilotulales ord. nov.	WYAZ01
Candidatus Cimelellales ord. nov.	1-14-0-20-42-13
Candidatus Cimelidales ord. nov.	SOKK01
Candidatus Ciminosales ord. nov.	ARS69
Candidatus Cimitellales ord. nov.	DSUN01
Candidatus Cimitosales ord. nov.	GCA-2863065
Candidatus Cinefanales ord. nov.	RBG-13-43-22
Candidatus Cinefosales ord. nov.	CR04bin15
Candidatus Cinipanales ord. nov.	SLNR01
Candidatus Cinipariales ord. nov.	CACIAM-69d
Candidatus Cinipulales ord. nov.	SZUA-21
Candidatus Cisalanales ord. nov.	SXXA01
Candidatus Cisorariales ord. nov.	UBA11346
Candidatus Citipariales ord. nov.	XYA12-FULL-58-9
Candidatus Citivulales ord. nov.	SpSt-600
Candidatus Citocariales ord. nov.	UBA4971
Candidatus Cocibiales ord. nov.	CAIPTA01
Candidatus Cocibosales ord. nov.	CG2-30-53-67
Candidatus Cocibulales ord. nov.	SZUA-242
Candidatus Cocodariales ord. nov.	JAAXHH01
Candidatus Cocodiales ord. nov.	ARS1246
Candidatus Codifanales ord. nov.	2-01-FULL-47-10
Candidatus Codifellales ord. nov.	UBA3071
Candidatus Cohorellales ord. nov.	JAAYUI01
Candidatus Colepanales ord. nov.	CG2-30-70-394
Candidatus Colepariales ord. nov.	PHBI01
Candidatus Colepidales ord. nov.	O2-12-FULL-43-9
Candidatus Colimanales ord. nov.	DTPJ01
Candidatus Colimellales ord. nov.	UBA7883
Candidatus Colipellales ord. nov.	JAACEG01
Candidatus Colipiales ord. nov.	SURF-26
Candidatus Coliposales ord. nov.	NDHX01
Candidatus Colipulales ord. nov.	FW602-bin22
Candidatus Colopariales ord. nov.	2-02-FULL-35-15
Candidatus Coloposales ord. nov.	JAAXGF01
Candidatus Colubidales ord. nov.	C00003060
Candidatus Colubulales ord. nov.	B4-G1
Candidatus Conarosales ord. nov.	GCA-2717565
Candidatus Conarulales ord. nov.	SpSt-1174
Candidatus Conifellales ord. nov.	UBA1144
Candidatus Conipanales ord. nov.	JABMQX01
Candidatus Conipulales ord. nov.	GCA-2400775
Candidatus Conubanales ord. nov.	VXPW01
Candidatus Corocosales ord. nov.	SZUA-161
Candidatus Cosidariales ord. nov.	SKZP01
Candidatus Cosididales ord. nov.	JAAXVQ01
Candidatus Cucurariales ord. nov.	UBA1398
Candidatus Cucurellales ord. nov.	Ch66
Candidatus Cucurosales ord. nov.	CAIRSR01
Candidatus Culibidales ord. nov.	B119-G9
Candidatus Culibulales ord. nov.	UBA3088
Candidatus Culilariales ord. nov.	UBA8481
Candidatus Cululanales ord. nov.	UBA5301
Candidatus Cululellales ord. nov.	JACIXR01
Candidatus Cululosales ord. nov.	FEN-1099
Candidatus Cunabariales ord. nov.	DUSP01
Candidatus Curabanales ord. nov.	UBA4802
Candidatus Curabariales ord. nov.	JABCZS01
Candidatus Curacanales ord. nov.	CADDZG01
Candidatus Curacellales ord. nov.	HGW-17
Candidatus Curacidales ord. nov.	54-19
Candidatus Curacosales ord. nov.	UBA2169
Candidatus Curotiales ord. nov.	SZUA-140
Candidatus Dapifanales ord. nov.	WVWN01
Candidatus Debucariales ord. nov.	REDH01
Candidatus Decacosales ord. nov.	GCA-2747255
Candidatus Decamariales ord. nov.	CADEGL01
Candidatus Decapulales ord. nov.	SURF-13
Candidatus Dececanales ord. nov.	VXOZ01
Candidatus Dececosales ord. nov.	SMXS01
Candidatus Decenellales ord. nov.	UBA8366
Candidatus Decenosales ord. nov.	UBA8346
Candidatus Deciniales ord. nov.	DTRM01
Candidatus Decinulales ord. nov.	PGYV01
Candidatus Decitellales ord. nov.	Kazan-3B-28
Candidatus Decitosales ord. nov.	J103
Candidatus Decomariales ord. nov.	UBA8108
Candidatus Decomulales ord. nov.	UBA6911
Candidatus Decunulales ord. nov.	QNDG01
Candidatus Decupulales ord. nov.	Pan216
Candidatus Defacanales ord. nov.	CAIKKV01
Candidatus Defacidales ord. nov.	CLD3
Candidatus Defaculales ord. nov.	GWF2-39-127
Candidatus Defalariales ord. nov.	MVZB01
Candidatus Defaranales ord. nov.	UBA1544
Candidatus Defarosales ord. nov.	DTU030
Candidatus Defasiales ord. nov.	UMGS1883
Candidatus Defetiales ord. nov.	BM002
Candidatus Deforanales ord. nov.	CAIJMQ01
Candidatus Deforosales ord. nov.	JAAZAB01
Candidatus Defosariales ord. nov.	JABMQH01
Candidatus Defosellales ord. nov.	DTU080
Candidatus Defosidales ord. nov.	DTU086
Candidatus Defulariales ord. nov.	JABEVK01
Candidatus Defuliales ord. nov.	UBA12178
Candidatus Defunellales ord. nov.	2-12-FULL-50-11
Candidatus Dehinanales ord. nov.	OLB16
Candidatus Dehisanales ord. nov.	GBS-1
Candidatus Dehonanales ord. nov.	UBA12225
Candidatus Dehonariales ord. nov.	UMGS1810
Candidatus Dehonellales ord. nov.	UBA994
Candidatus Dehonosales ord. nov.	JABMPQ01
Candidatus Delapellales ord. nov.	4484-211
Candidatus Delapiales ord. nov.	Rs-D84
Candidatus Delebidales ord. nov.	Ga0077536
Candidatus Delubanales ord. nov.	UBA5859
Candidatus Democariales ord. nov.	GWA2-46-9
Candidatus Demogosales ord. nov.	UBA8477
Candidatus Demulariales ord. nov.	UBA7887
Candidatus Demulidales ord. nov.	GCA-2729495
Candidatus Demululales ord. nov.	RBG-16-64-13
Candidatus Denaviales ord. nov.	UBA2428
Candidatus Denavulales ord. nov.	XYA2-FULL-43-10
Candidatus Denicidales ord. nov.	UBA6624
Candidatus Denicosales ord. nov.	UBA920
Candidatus Deniganales ord. nov.	CAIRYL01
Candidatus Denigellales ord. nov.	CAIWXX01
Candidatus Denixidales ord. nov.	2-01-FULL-59-12
Candidatus Denixulales ord. nov.	JAAYCJ01
Candidatus Denomulales ord. nov.	UBA6257
Candidatus Denupanales ord. nov.	SICC01
Candidatus Depacidales ord. nov.	UBA1429
Candidatus Deparellales ord. nov.	DT-59
Candidatus Deparidales ord. nov.	UMGS1260
Candidatus Depasidales ord. nov.	WTBG01
Candidatus Depecariales ord. nov.	WRLR01
Candidatus Depelidales ord. nov.	DTU022
Candidatus Depetariales ord. nov.	UBA9649
Candidatus Depicariales ord. nov.	GCA-2792135
Candidatus Depicidales ord. nov.	JACMPN01
Candidatus Depocosales ord. nov.	UBA4473
Candidatus Depoposales ord. nov.	PH28-bin88
Candidatus Depupellales ord. nov.	UBA8416
Candidatus Depupiales ord. nov.	RBG-16-64-22
Candidatus Dereliales ord. nov.	UBA6595
Candidatus Derunellales ord. nov.	UM-FILTER-39-15
Candidatus Derunosales ord. nov.	UCB3
Candidatus Desepiales ord. nov.	J057
Candidatus Desepulales ord. nov.	RUG11792
Candidatus Desomariales ord. nov.	GCA-002720895
Candidatus Desomellales ord. nov.	PEYW01
Candidatus Desonellales ord. nov.	AABM5-125-24
Candidatus Desorariales ord. nov.	UBA1018
Candidatus Desulidales ord. nov.	JdFR-97
Candidatus Desupariales ord. nov.	HR10
Candidatus Desuposales ord. nov.	GCA-2686955
Candidatus Desurellales ord. nov.	UBA12405
Candidatus Detenellales ord. nov.	UBA2770
Candidatus Detepidales ord. nov.	UBA10025
Candidatus Detorariales ord. nov.	J040
Candidatus Detoridales ord. nov.	JABDET01
Candidatus Detosariales ord. nov.	SHVT01
Candidatus Detosidales ord. nov.	UBA8153
Candidatus Detotidales ord. nov.	SHXV01
Candidatus Detotulales ord. nov.	QYQD01
Candidatus Deveciales ord. nov.	UBA7702
Candidatus Dicibulales ord. nov.	SMYD01
Candidatus Dicimariales ord. nov.	GCA-2687025
Candidatus Dicimiales ord. nov.	DTKB01
Candidatus Dicimosales ord. nov.	CAILMK01
Candidatus Didacellales ord. nov.	UBA1135
Candidatus Didaciales ord. nov.	UBA8919
Candidatus Dileculales ord. nov.	JABDDW01
Candidatus Dilibanales ord. nov.	JdFR-78
Candidatus Dilicellales ord. nov.	UBA7541
Candidatus Dilogidales ord. nov.	JACCXV01
Candidatus Dilogosales ord. nov.	UBA9629
Candidatus Dilogulales ord. nov.	Bin125
Candidatus Diludidales ord. nov.	WQYP01
Candidatus Dimacanales ord. nov.	UBA9673
Candidatus Dimacariales ord. nov.	JAAYKD01
Candidatus Dimacellales ord. nov.	SURF-38
Candidatus Dimadariales ord. nov.	QNBC01
Candidatus Diminidales ord. nov.	UBA5214
Candidatus Dinuposales ord. nov.	UBA2966
Candidatus Diponiales ord. nov.	JABMQR01
Candidatus Direculales ord. nov.	J045
Candidatus Disidariales ord. nov.	UBA1551
Candidatus Divolellales ord. nov.	UBA5177
Candidatus Divolidales ord. nov.	DTEH01
Candidatus Divulosales ord. nov.	UBA4068
Candidatus Documariales ord. nov.	WVXT01
Candidatus Domicosales ord. nov.	UBA10183
Candidatus Domiculales ord. nov.	2-01-FULL-39-13
Candidatus Domigosales ord. nov.	UBA10199
Candidatus Domigulales ord. nov.	WLWR01
Candidatus Domipidales ord. nov.	XYC2-FULL-46-14
Candidatus Doxolanales ord. nov.	B21-G16
Candidatus Doxolariales ord. nov.	UBA6077
Candidatus Ducilanales ord. nov.	GWA2-38-11
Candidatus Ducilidales ord. nov.	DTU010
Candidatus Duponariales ord. nov.	2-02-FULL-44-16
Candidatus Dupunellales ord. nov.	UBA4821
Candidatus Duricellales ord. nov.	GCA-2701885
Candidatus Effigidales ord. nov.	Palsa-1104
Candidatus Exsanellales ord. nov.	Fen-336
Candidatus Facunulales ord. nov.	UBA4486
Candidatus Famelulales ord. nov.	PWVN01
Candidatus Fatifellales ord. nov.	UM-FILTER-40-11
Candidatus Fatifosales ord. nov.	UBA1212
Candidatus Fatilellales ord. nov.	UBA9655
Candidatus Favilellales ord. nov.	2-02-FULL-40-11
Candidatus Fecunulales ord. nov.	SURF-5
Candidatus Feditellales ord. nov.	CAIQBE01
Candidatus Feditidales ord. nov.	RUG12999
Candidatus Feditosales ord. nov.	UBA2466
Candidatus Feditulales ord. nov.	SM23-31
Candidatus Fefelulales ord. nov.	UBA6729
Candidatus Feficosales ord. nov.	UBA7950
Candidatus Femelariales ord. nov.	UBA2766
Candidatus Fetifanales ord. nov.	UBA11236
Candidatus Fetifosales ord. nov.	MHYJ01
Candidatus Fetifulales ord. nov.	UBA2386
Candidatus Fetuliales ord. nov.	CAIUPP01
Candidatus Fetulidales ord. nov.	UTPRO1
Candidatus Fetutanales ord. nov.	UBA9339
Candidatus Fetutosales ord. nov.	JABWBI01
Candidatus Ficedosales ord. nov.	JACMRA01
Candidatus Fidenanales ord. nov.	DUPQ01
Candidatus Fidenariales ord. nov.	UBA4092
Candidatus Fidenellales ord. nov.	GWA2-35-9
Candidatus Foricariales ord. nov.	RUG730
Candidatus Forinellales ord. nov.	DRLW01
Candidatus Forinosales ord. nov.	SM23-61
Candidatus Fuliganales ord. nov.	UBA3569
Candidatus Fuligidales ord. nov.	JABMRG01
Candidatus Fuligosales ord. nov.	B26-G2
Candidatus Fumacellales ord. nov.	JACDCP01
Candidatus Fumifariales ord. nov.	UBA6615
Candidatus Fumifiales ord. nov.	SB21
Candidatus Funamanales ord. nov.	UBA2233
Candidatus Funamiales ord. nov.	UBA7656
Candidatus Funivellales ord. nov.	WTKD01
Candidatus Furibidales ord. nov.	UBA6266
Candidatus Futatariales ord. nov.	SURF-12
Candidatus Gabinosales ord. nov.	UBA7879
Candidatus Gasifiales ord. nov.	32-111
Candidatus Gasifulales ord. nov.	JAAZEB01
Candidatus Gasomulales ord. nov.	JAADFJ01
Candidatus Gemebosales ord. nov.	UBA9088
Candidatus Genoculales ord. nov.	VFKW01
Candidatus Genufiales ord. nov.	SLRQ01
Candidatus Gerunidales ord. nov.	FEN-1346
Candidatus Habacariales ord. nov.	DRLM01
Candidatus Habacosales ord. nov.	2-12-FULL-54-10
Candidatus Habaculales ord. nov.	JABMRZ01
Candidatus Haluculales ord. nov.	CF-121
Candidatus Hariciales ord. nov.	UBA1161
Candidatus Hecatiales ord. nov.	CSP1-4
Candidatus Hecatidales ord. nov.	CACJXQ01
Candidatus Hecatosales ord. nov.	SM23-28-2
Candidatus Hegumidales ord. nov.	J025
Candidatus Hegumosales ord. nov.	UBA828
Candidatus Hemitariales ord. nov.	4484-49
Candidatus Herinariales ord. nov.	SM23-81
Candidatus Hexagellales ord. nov.	SBBH01
Candidatus Hexagidales ord. nov.	B21-G9
Candidatus Hexapariales ord. nov.	UBA1062
Candidatus Hexaposales ord. nov.	UBA4151
Candidatus Hibisellales ord. nov.	VBWC01
Candidatus Hirudulales ord. nov.	UBA6099
Candidatus Hirunellales ord. nov.	JAAZLZ01
Candidatus Holovidales ord. nov.	UBA5704
Candidatus Holovosales ord. nov.	DTU087
Candidatus Homagidales ord. nov.	MAG-NZ
Candidatus Homicosales ord. nov.	UBA1063
Candidatus Homogariales ord. nov.	JAAYXC01
Candidatus Homoliales ord. nov.	4484-171
Candidatus Homulosales ord. nov.	UBA2258
Candidatus Homunariales ord. nov.	B129-G9
Candidatus Homunulales ord. nov.	UBA2200
Candidatus Horomanales ord. nov.	UBA2777
Candidatus Humeculales ord. nov.	DUMW01
Candidatus Labecellales ord. nov.	SG8-24
Candidatus Labeciales ord. nov.	SM23-42
Candidatus Lacinanales ord. nov.	UBA4882
Candidatus Laculariales ord. nov.	16-39-46
Candidatus Laculosales ord. nov.	DG-27
Candidatus Lametariales ord. nov.	CAILIB01
Candidatus Lametosales ord. nov.	WRAU01
Candidatus Lanifulales ord. nov.	4572-55
Candidatus Laniganales ord. nov.	UBA6186
Candidatus Lanigellales ord. nov.	JACCYY01
Candidatus Lanugellales ord. nov.	JAAYUB01
Candidatus Lapilanales ord. nov.	D2-FULL-39-29
Candidatus Latibiales ord. nov.	UBA3505
Candidatus Lavacosales ord. nov.	B3-LCP
Candidatus Lavaculales ord. nov.	WVZY01
Candidatus Laxitanales ord. nov.	CG03
Candidatus Lenocellales ord. nov.	B62-G9
Candidatus Lenunidales ord. nov.	CSSED10-310
Candidatus Letifariales ord. nov.	UBA2991
Candidatus Letifosales ord. nov.	UBA9983
Candidatus Levidiales ord. nov.	MC1
Candidatus Levifellales ord. nov.	SpSt-1050
Candidatus Licenulales ord. nov.	SHYM01
Candidatus Locelanales ord. nov.	SHVV01
Candidatus Locupiales ord. nov.	RKRP01
Candidatus Locupidales ord. nov.	SHVW01
Candidatus Loripariales ord. nov.	SURF-8
Candidatus Loriposales ord. nov.	UBA2565
Candidatus Lubenariales ord. nov.	SHVP01
Candidatus Lucelariales ord. nov.	SPJN01
Candidatus Lucelellales ord. nov.	DULZ01
Candidatus Luceliales ord. nov.	WHTO01
Candidatus Luceranales ord. nov.	CAIWAD01
Candidatus Luculellales ord. nov.	CAIUEV01
Candidatus Luculidales ord. nov.	DRYD01
Candidatus Luculosales ord. nov.	HDB-SIOI813
Candidatus Ludibellales ord. nov.	J044
Candidatus Ludifosales ord. nov.	SMXP01
Candidatus Ludimariales ord. nov.	2-02-FULL-49-11
Candidatus Lupanellales ord. nov.	UBA10105
Candidatus Lupanidales ord. nov.	43-37
Candidatus Lutulosales ord. nov.	CG1-02-43-210
Candidatus Luxurellales ord. nov.	GCA-2747355
Candidatus Luxurulales ord. nov.	AqS3
Candidatus Mahelulales ord. nov.	DTIG01
Candidatus Malagiales ord. nov.	JAADGQ01
Candidatus Malagosales ord. nov.	UBA11222
Candidatus Maledanales ord. nov.	B15-G4
Candidatus Maledidales ord. nov.	JABABF01
Candidatus Maledulales ord. nov.	JABWAM01
Candidatus Maligariales ord. nov.	UBA2562
Candidatus Malogidales ord. nov.	JdFR-76
Candidatus Malogosales ord. nov.	DTPP01
Candidatus Manibanales ord. nov.	Plut-88900
Candidatus Manibosales ord. nov.	CADAEX01
Candidatus Manomiales ord. nov.	SHYD01
Candidatus Manubanales ord. nov.	UBA7662
Candidatus Manubulales ord. nov.	Bin65
Candidatus Maxiliales ord. nov.	DTNB01
Candidatus Maxilosales ord. nov.	DTQI01
Candidatus Maxumariales ord. nov.	UBA7540
Candidatus Medimellales ord. nov.	UBA2968
Candidatus Medimulales ord. nov.	SLOV01
Candidatus Megalanales ord. nov.	SM23-33
Candidatus Megalellales ord. nov.	Ch128b
Candidatus Megalulales ord. nov.	ZOR0006
Candidatus Melilanales ord. nov.	UBA796
Candidatus Melilidales ord. nov.	UBA1874
Candidatus Menapellales ord. nov.	SDB-A
Candidatus Menapidales ord. nov.	B3-B38
Candidatus Menapulales ord. nov.	PWPR01
Candidatus Meridellales ord. nov.	MPNO01
Candidatus Meridosales ord. nov.	UBA3561
Candidatus Metabidales ord. nov.	UBA6184
Candidatus Milifosales ord. nov.	RPQK01
Candidatus Milipellales ord. nov.	4484-113
Candidatus Mimogellales ord. nov.	UBA5359
Candidatus Minagiales ord. nov.	CSP1-3
Candidatus Mirabulales ord. nov.	UBA7526
Candidatus Modifidales ord. nov.	UBA8473
Candidatus Modifosales ord. nov.	JABDGN01
Candidatus Molecanales ord. nov.	UBA1406
Candidatus Momorariales ord. nov.	DRVO01
Candidatus Momorellales ord. nov.	SMXQ01
Candidatus Monimellales ord. nov.	UBA10092
Candidatus Monimidales ord. nov.	J002
Candidatus Monocellales ord. nov.	UBA9087
Candidatus Monodosales ord. nov.	UBA6902
Candidatus Monogosales ord. nov.	Ga0077554
Candidatus Monumulales ord. nov.	RBG-16-42-10
Candidatus Morigosales ord. nov.	UBA3073
Candidatus Munifidales ord. nov.	DSSB01
Candidatus Murelariales ord. nov.	CAIXZC01
Candidatus Musulosales ord. nov.	J088
Candidatus Navicanales ord. nov.	0-14-0-20-40-13
Candidatus Navifanales ord. nov.	B64-G9
Candidatus Navifidales ord. nov.	UBA6919
Candidatus Nefaridales ord. nov.	UBA4820
Candidatus Nefarosales ord. nov.	JABSOH01
Candidatus Negidariales ord. nov.	BMS3ABIN01
Candidatus Negididales ord. nov.	UBA5070
Candidatus Negotariales ord. nov.	UBA12015
Candidatus Nicomellales ord. nov.	XYD2-FULL-50-16
Candidatus Nicotellales ord. nov.	SpSt-318
Candidatus Nimirellales ord. nov.	UBA2963
Candidatus Nimirosales ord. nov.	QNFN01
Candidatus Niteliales ord. nov.	Ch29
Candidatus Nivomanales ord. nov.	CG2-30-40-21
Candidatus Nivomellales ord. nov.	UBA1127
Candidatus Nivomosales ord. nov.	GCA-2401425
Candidatus Nocenellales ord. nov.	9FT-COMBO-53-11
Candidatus Nocumidales ord. nov.	CAIYQO01
Candidatus Noninellales ord. nov.	UBA1444
Candidatus Nosocidales ord. nov.	CAIVPW01
Candidatus Nosocosales ord. nov.	B1SED10-174
Candidatus Notacellales ord. nov.	GWA2-44-7
Candidatus Nubifariales ord. nov.	TMED109
Candidatus Nugacanales ord. nov.	DSPP01
Candidatus Nugacosales ord. nov.	JACCUZ01
Candidatus Nugigellales ord. nov.	JAAYHZ01
Candidatus Nugigiales ord. nov.	MWCT01
Candidatus Nugivellales ord. nov.	UBA1558
Candidatus Nugividales ord. nov.	DTU014
Candidatus Pabilariales ord. nov.	DTLL01
Candidatus Pabilellales ord. nov.	PCC-7407
Candidatus Pacifariales ord. nov.	SCPX01
Candidatus Pacifidales ord. nov.	DTJY01
Candidatus Panifiales ord. nov.	B13-G15
Candidatus Panifidales ord. nov.	UBA1384
Candidatus Papiliales ord. nov.	UBA1565
Candidatus Papilidales ord. nov.	Bin98
Candidatus Papilulales ord. nov.	UBA8558
Candidatus Paraciales ord. nov.	UBA4575
Candidatus Parocellales ord. nov.	UBA3830
Candidatus Paropulales ord. nov.	UBA6926
Candidatus Patibellales ord. nov.	B68-G9
Candidatus Patibiales ord. nov.	DTHP01
Candidatus Patibidales ord. nov.	JAAYEA01
Candidatus Pavicanales ord. nov.	UBA11029
Candidatus Pecunellales ord. nov.	UBA9570
Candidatus Pecunidales ord. nov.	UM-FILTER-42-10
Candidatus Penecariales ord. nov.	E26-bin7
Candidatus Penecellales ord. nov.	DTGQ01
Candidatus Peneculales ord. nov.	SHNJ01
Candidatus Pepenellales ord. nov.	YA12-FULL-61-11
Candidatus Perabidales ord. nov.	T3Sed10-11
Candidatus Peradellales ord. nov.	PCC-7336
Candidatus Peradosales ord. nov.	UBA6777
Candidatus Perexidales ord. nov.	CAIYYT01
Candidatus Perexulales ord. nov.	RKRQ01
Candidatus Peribosales ord. nov.	UBA2591
Candidatus Peridariales ord. nov.	HIMB59
Candidatus Periposales ord. nov.	JABLXB01
Candidatus Pimenidales ord. nov.	UBA2392
Candidatus Pimenosales ord. nov.	UBA12402
Candidatus Pinacariales ord. nov.	UBA7366
Candidatus Pinacidales ord. nov.	0-14-0-10-38-17
Candidatus Piniganales ord. nov.	CAISUE01
Candidatus Podagulales ord. nov.	SP197
Candidatus Pulegosales ord. nov.	UM-FILTER-46-8
Candidatus Purulanales ord. nov.	J132
Candidatus Rarefulales ord. nov.	SM23-32
Candidatus Ratifellales ord. nov.	UBA10015
Candidatus Recogosales ord. nov.	DSLN01
Candidatus Recuciales ord. nov.	UBA2361
Candidatus Recuculales ord. nov.	UBA1149
Candidatus Redaciales ord. nov.	SCGC-AAA003-L08
Candidatus Redacidales ord. nov.	CG2-30-64-16
Candidatus Refaciales ord. nov.	UBA11654
Candidatus Refocellales ord. nov.	E44-bin18
Candidatus Reforellales ord. nov.	KS3-K002
Candidatus Refuliales ord. nov.	GWF2-35-9
Candidatus Refulosales ord. nov.	NMUJ01
Candidatus Regifosales ord. nov.	B28-G17
Candidatus Relapellales ord. nov.	BMS3Abin14
Candidatus Relapulales ord. nov.	CG1-02-64-396
Candidatus Relecariales ord. nov.	UBA995
Candidatus Relenanales ord. nov.	UBA11705
Candidatus Releniales ord. nov.	UBA7937
Candidatus Relenosales ord. nov.	SM1-40
Candidatus Remedanales ord. nov.	E44-bin80
Candidatus Remulellales ord. nov.	UBA6215
Candidatus Renavosales ord. nov.	UBA2214
Candidatus Repaganales ord. nov.	HRBIN16
Candidatus Repagariales ord. nov.	2-02-FULL-40-12
Candidatus Repecosales ord. nov.	HRBIN30
Candidatus Repeculales ord. nov.	WVXJ01
Candidatus Repepariales ord. nov.	B3-TA06
Candidatus Repepulales ord. nov.	CAINFC01
Candidatus Repuranales ord. nov.	2-12-FULL-62-27
Candidatus Repurellales ord. nov.	WRBN01
Candidatus Repuriales ord. nov.	B22-G15
Candidatus Repurosales ord. nov.	B21-G15
Candidatus Resacellales ord. nov.	MWEM01
Candidatus Resalulales ord. nov.	UBA10988
Candidatus Resuliales ord. nov.	RBG-13-66-14
Candidatus Resululales ord. nov.	JABDMI01
Candidatus Resupiales ord. nov.	CAJBMM01
Candidatus Resurulales ord. nov.	GCA-2716485
Candidatus Retuniales ord. nov.	B70-G9
Candidatus Revecariales ord. nov.	UBA4055
Candidatus Revecidales ord. nov.	SLMV01
Candidatus Reveculales ord. nov.	SLAD01
Candidatus Ridibellales ord. nov.	UBA1439
Candidatus Rinocanales ord. nov.	SZUA-182
Candidatus Risibanales ord. nov.	2-12-FULL-45-22
Candidatus Rorulosales ord. nov.	DG-23
Candidatus Rosacidales ord. nov.	UBA11872
Candidatus Rosarariales ord. nov.	UBA10806
Candidatus Rosarellales ord. nov.	IMCC26256
Candidatus Rubefellales ord. nov.	UBA6191
Candidatus Rubefiales ord. nov.	JAAYZQ01
Candidatus Rubefidales ord. nov.	JABDJQ01
Candidatus Rubiculales ord. nov.	QNFE01
Candidatus Rubigariales ord. nov.	UBA9042
Candidatus Rudecanales ord. nov.	DSWA01
Candidatus Rudecariales ord. nov.	UBA6522
Candidatus Rudicellales ord. nov.	UBA5794
Candidatus Rudiciales ord. nov.	SKNC01
Candidatus Rumifiales ord. nov.	HK1
Candidatus Ruricariales ord. nov.	UM-FILTER-43-11
Candidatus Rurigosales ord. nov.	JABMSA01
Candidatus Rutabanales ord. nov.	SICM01
Candidatus Rutabariales ord. nov.	JAADFL01
Candidatus Sacoposales ord. nov.	JACIYH01
Candidatus Sacopulales ord. nov.	UBA2979
Candidatus Salubanales ord. nov.	2-02-FULL-50-16
Candidatus Salubiales ord. nov.	RBG-13-55-18
Candidatus Sanabidales ord. nov.	PUNC01
Candidatus Sarabosales ord. nov.	SRT547
Candidatus Satacariales ord. nov.	CG2-30-40-12
Candidatus Satacellales ord. nov.	DQWO01
Candidatus Satacidales ord. nov.	JABWCM01
Candidatus Saxifidales ord. nov.	RPQS01
Candidatus Saxopellales ord. nov.	UBA4975
Candidatus Secunariales ord. nov.	PIWD01
Candidatus Seleciales ord. nov.	UBA2400
Candidatus Selibosales ord. nov.	MWAK01
Candidatus Semifariales ord. nov.	UBA7985
Candidatus Semiganales ord. nov.	HTCC5015
Candidatus Semigiales ord. nov.	MnTg04
Candidatus Semilidales ord. nov.	UBA1407
Candidatus Semimellales ord. nov.	SPDA01
Candidatus Semimosales ord. nov.	DSWW01
Candidatus Semimulales ord. nov.	JAABTG01
Candidatus Semodidales ord. nov.	JAADGH01
Candidatus Semodulales ord. nov.	UBA8468
Candidatus Semunellales ord. nov.	UBA2242
Candidatus Semunulales ord. nov.	UBA6262
Candidatus Senacellales ord. nov.	PIVX01
Candidatus Senipariales ord. nov.	SAR202-VII-2
Candidatus Senipiales ord. nov.	JACAEB01
Candidatus Seposanales ord. nov.	GWB1-36-13
Candidatus Sicarariales ord. nov.	CAIXNZ01
Candidatus Sicarulales ord. nov.	UBA4248
Candidatus Sicubidales ord. nov.	DSGV01
Candidatus Sicubulales ord. nov.	UMGS1840
Candidatus Sifunosales ord. nov.	2-12-FULL-37-12
Candidatus Siligiales ord. nov.	UBA2774
Candidatus Siligulales ord. nov.	PFEM01
Candidatus Siminiales ord. nov.	HRBIN11
Candidatus Siteliales ord. nov.	PUPC01
Candidatus Sitelulales ord. nov.	SHVZ01
Candidatus Siticanales ord. nov.	GCA-001735895
Candidatus Siticiales ord. nov.	J058
Candidatus Socagiales ord. nov.	JAADHS01
Candidatus Solaculales ord. nov.	SZUA-146
Candidatus Solifellales ord. nov.	CAIUCS01
Candidatus Solifidales ord. nov.	UBA10029
Candidatus Solipanales ord. nov.	UBA6002
Candidatus Solipiales ord. nov.	CAISDR01
Candidatus Solivanales ord. nov.	J063
Candidatus Solivellales ord. nov.	JAADGY01
Candidatus Sonabellales ord. nov.	DTU084
Candidatus Sonabidales ord. nov.	RBG-16-71-46
Candidatus Sonipanales ord. nov.	DTKN01
Candidatus Sonivellales ord. nov.	DUMD01
Candidatus Sotululales ord. nov.	UBA11136
Candidatus Subabariales ord. nov.	1-14-2-50-48-13
Candidatus Subacosales ord. nov.	SLPQ01
Candidatus Subadanales ord. nov.	T1SED10-198M
Candidatus Subodanales ord. nov.	UBA9936
Candidatus Subodellales ord. nov.	JdFR-54
Candidatus Subodidales ord. nov.	VMEV01
Candidatus Sugilidales ord. nov.	Bin61
Candidatus Susicellales ord. nov.	UBA5829
Candidatus Tabifellales ord. nov.	GWC2-55-46
Candidatus Tabifidales ord. nov.	CADDZV01
Candidatus Tabifulales ord. nov.	XYB2-FULL-38-15
Candidatus Tabitanales ord. nov.	JABWAT01
Candidatus Tabitiales ord. nov.	UBA8921
Candidatus Tametanales ord. nov.	CG2-30-54-11
Candidatus Tegimosales ord. nov.	UBA7966
Candidatus Telefanales ord. nov.	GWA2-38-13b
Candidatus Telegariales ord. nov.	GWA2-43-13
Candidatus Telegellales ord. nov.	JACIZP01
Candidatus Televariales ord. nov.	SpSt-956
Candidatus Televosales ord. nov.	J113
Candidatus Tenebosales ord. nov.	UBA5066
Candidatus Tenemanales ord. nov.	GWE2-31-10
Candidatus Tenemiales ord. nov.	QZLD01
Candidatus Terebanales ord. nov.	UBA2985
Candidatus Tibicosales ord. nov.	FW602-bin16
Candidatus Tibiculales ord. nov.	AqS2
Candidatus Timefulales ord. nov.	UBA1414
Candidatus Tirocanales ord. nov.	2-02-FULL-39-32
Candidatus Tirocariales ord. nov.	B26-G9
Candidatus Tirocellales ord. nov.	BM003
Candidatus Tirunanales ord. nov.	RBC074
Candidatus Tiruniales ord. nov.	SpSt-205
Candidatus Tomaciales ord. nov.	SZUA-336
Candidatus Tomogosales ord. nov.	UBA3072
Candidatus Totidariales ord. nov.	CACEW01
Candidatus Totidiales ord. nov.	PWKZ01
Candidatus Totidulales ord. nov.	UBA2196
Candidatus Tubicidales ord. nov.	UBA1875
Candidatus Tubicosales ord. nov.	UBA8317
Candidatus Tumefanales ord. nov.	DUEN01
Candidatus Tumefidales ord. nov.	UBA890
Candidatus Turicariales ord. nov.	GWC2-36-17
Candidatus Turifosales ord. nov.	UBA8248
Candidatus Turilariales ord. nov.	UBA8349
Candidatus Vaciliales ord. nov.	DUMP01
Candidatus Vacilosales ord. nov.	GCA-2746535
Candidatus Vagabanales ord. nov.	UBA10030
Candidatus Vavasidales ord. nov.	PHAN01
Candidatus Vecorulales ord. nov.	UBA4733
Candidatus Vehemiales ord. nov.	UBA11073
Candidatus Vehemidales ord. nov.	UBA6098
Candidatus Vehicidales ord. nov.	UBA4664
Candidatus Velifiales ord. nov.	0-14-0-80-59-12
Candidatus Velifidales ord. nov.	JABSQK01
Candidatus Venefariales ord. nov.	QHBO01
Candidatus Venefiales ord. nov.	2-02-FULL-39-11
Candidatus Venefosales ord. nov.	SLND01
Candidatus Venunanales ord. nov.	UM-FILTER-49-7
Candidatus Venunellales ord. nov.	UBA3054
Candidatus Venuniales ord. nov.	UBA7916
Candidatus Vepalariales ord. nov.	Bin95
Candidatus Verecellales ord. nov.	CG2-30-59-28
Candidatus Verifidales ord. nov.	DUMF01
Candidatus Viburellales ord. nov.	DTGP01
Candidatus Vicatellales ord. nov.	DRWM01
Candidatus Vicecosales ord. nov.	RBG-16-55-9
Candidatus Videlulales ord. nov.	CG1-02-37-114
Candidatus Vigenanales ord. nov.	UBA1146
Candidatus Viginariales ord. nov.	LLD-282
Candidatus Viginidales ord. nov.	OLB7
Candidatus Vilipariales ord. nov.	JACCXJ01
Candidatus Vilitulales ord. nov.	DRWO01
Candidatus Vinolariales ord. nov.	UBA3575
Candidatus Vinolellales ord. nov.	LZORAL124-64-63
Candidatus Vinolidales ord. nov.	UBA10190
Candidatus Viragulales ord. nov.	SURF-47
Candidatus Virecariales ord. nov.	ATN3
Candidatus Virecellales ord. nov.	RZYC01
Candidatus Viripanales ord. nov.	SZUA-567
Candidatus Viripariales ord. nov.	20CM-2-55-15
Candidatus Viripulales ord. nov.	AC-67
Candidatus Visibellales ord. nov.	B11-G9
Candidatus Visibiales ord. nov.	UBA8260
Candidatus Visocariales ord. nov.	UBA2241
Candidatus Visocosales ord. nov.	DSUL01
Candidatus Vitabiales ord. nov.	JAACET01
Candidatus Vitifariales ord. nov.	TC1
Candidatus Vituposales ord. nov.	Ch115
Candidatus Vitupulales ord. nov.	GCA-2731375
Candidatus Vivifidales ord. nov.	UBA9942
Candidatus Vocamanales ord. nov.	QHYA01
Candidatus Volubellales ord. nov.	WRKU01
Candidatus Volubiales ord. nov.	RBG-13-61-14
Candidatus Volucanales ord. nov.	SZUA-6
Candidatus Volucosales ord. nov.	UBA9217
Candidatus Voragidales ord. nov.	UBA2201
Candidatus Xeroposales ord. nov.	UBA2394
Candidatus Acrotanaceae fam. nov.	Fen-1088
Candidatus Adsusariaceae fam. nov.	Bog-1112
Candidatus Antegiaceae fam. nov.	Palsa-1295
Candidatus Appugulaceae fam. nov.	Fen-727
Candidatus Attubulaceae fam. nov.	Palsa-688
Candidatus Bacifariaceae fam. nov.	B143-G9
Candidatus Bacifiaceae fam. nov.	DUMB01
Candidatus Bacifosaceae fam. nov.	CAIZGN01
Candidatus Baditanaceae fam. nov.	21-64-14
Candidatus Baditariaceae fam. nov.	UBA6952
Candidatus Baditosaceae fam. nov.	CG1-02-41-26
Candidatus Baropanaceae fam. nov.	HRBIN17
Candidatus Baropellaceae fam. nov.	SURF-54
Candidatus Benemanaceae fam. nov.	DTU025
Candidatus Benemariaceae fam. nov.	CAG-977
Candidatus Benemiaceae fam. nov.	UBA1758
Candidatus Benemidaceae fam. nov.	CAIXSY01
Candidatus Benemulaceae fam. nov.	COTS27
Candidatus Benepanaceae fam. nov.	GCA-2753255
Candidatus Benepiaceae fam. nov.	JdFR-85
Candidatus Beneposaceae fam. nov.	Bin18
Candidatus Benepulaceae fam. nov.	GCA-2746185
Candidatus Beneviaceae fam. nov.	J009
Candidatus Benevidaceae fam. nov.	GCA-002691585
Candidatus Benevosaceae fam. nov.	JdFR-81
Candidatus Benevulaceae fam. nov.	ETH-SRB1
Candidatus Benifanaceae fam. nov.	RGZA01
Candidatus Benifellaceae fam. nov.	RFPC01
Candidatus Benifiaceae fam. nov.	PEXW01
Candidatus Benifidaceae fam. nov.	Fen-1064
Candidatus Benifulaceae fam. nov.	UBA1257
Candidatus Beniviaceae fam. nov.	GWA2-44-9
Candidatus Benividaceae fam. nov.	SHWA01
Candidatus Benivosaceae fam. nov.	SG8-38
Candidatus Betacanaceae fam. nov.	SLMC01
Candidatus Betacariaceae fam. nov.	DP-6
Candidatus Bicalariaceae fam. nov.	DSCS01
Candidatus Bicaliaceae fam. nov.	UBA10511
Candidatus Bicalulaceae fam. nov.	UBA1568
Candidatus Bicapariaceae fam. nov.	CAIZLB01
Candidatus Bicapellaceae fam. nov.	QHCD01
Candidatus Bicapulaceae fam. nov.	JAAYNZ01
Candidatus Bicinariaceae fam. nov.	SpSt-225
Candidatus Bicipanaceae fam. nov.	Gp1-AA112
Candidatus Bicipellaceae fam. nov.	UBA3495
Candidatus Bicipiaceae fam. nov.	CAISPN01
Candidatus Bicodidaceae fam. nov.	2-01-FULL-58-14
Candidatus Bicodulaceae fam. nov.	B25-G16
Candidatus Bicorellaceae fam. nov.	JAADDL01
Candidatus Bicoriaceae fam. nov.	B130-G9
Candidatus Bicoridaceae fam. nov.	UBA7694
Candidatus Bicubidaceae fam. nov.	CAIPFW01
Candidatus Bicubosaceae fam. nov.	4484-276
Candidatus Bifaranaceae fam. nov.	DUVY01
Candidatus Bifarellaceae fam. nov.	UBA1977
Candidatus Bifarosaceae fam. nov.	WRCU01
Candidatus Bifisanaceae fam. nov.	UBA644
Candidatus Bifisiaceae fam. nov.	GCA-001730085
Candidatus Bifisidaceae fam. nov.	SBBB01
Candidatus Bifisulaceae fam. nov.	CR-1
Candidatus Bigaranaceae fam. nov.	UBA11373
Candidatus Bigariaceae fam. nov.	SORT01
Candidatus Bigemiaceae fam. nov.	UBA6126
Candidatus Bigemidaceae fam. nov.	DUZN01
Candidatus Bigemosaceae fam. nov.	CAILAD01
Candidatus Bimetanaceae fam. nov.	JGIOTU-2
Candidatus Bimetellaceae fam. nov.	HGM11514
Candidatus Bimetiaceae fam. nov.	2-12-FULL-35-15
Candidatus Bimetulaceae fam. nov.	DTNQ01
Candidatus Bimotanaceae fam. nov.	UBA868
Candidatus Bimotariaceae fam. nov.	JABMQE01
Candidatus Bimotosaceae fam. nov.	GCA-002787255
Candidatus Bimotulaceae fam. nov.	RZZR01
Candidatus Binocellaceae fam. nov.	CAIOSU01
Candidatus Binociaceae fam. nov.	UBA3531
Candidatus Binocidaceae fam. nov.	E44-bin32
Candidatus Bipalanaceae fam. nov.	Palsa-1439
Candidatus Bipalellaceae fam. nov.	DTSZ01
Candidatus Biparidaceae fam. nov.	JABMRJ01
Candidatus Bipatanaceae fam. nov.	GWA2-47-10b
Candidatus Bipatariaceae fam. nov.	DTLF01
Candidatus Bipatiaceae fam. nov.	1-14-0-20-45-26
Candidatus Bipatosaceae fam. nov.	SZUA-35
Candidatus Bipenariaceae fam. nov.	SYMT01
Candidatus Bipenidaceae fam. nov.	MVCY01
Candidatus Bipinanaceae fam. nov.	TMED-70
Candidatus Bipinariaceae fam. nov.	SZUA-365
Candidatus Bipinellaceae fam. nov.	JdFR-88
Candidatus Bipiniaceae fam. nov.	BX7
Candidatus Bipinosaceae fam. nov.	RSA5
Candidatus Bisacanaceae fam. nov.	WRJC01
Candidatus Bisacariaceae fam. nov.	J137
Candidatus Bisacellaceae fam. nov.	UBA2185
Candidatus Bisaciaceae fam. nov.	WYBJ01
Candidatus Bisacosaceae fam. nov.	UBA4738
Candidatus Bisulanaceae fam. nov.	F1-60-MAGs149
Candidatus Bisulariaceae fam. nov.	CADAWZ01
Candidatus Bisulellaceae fam. nov.	JAAYKL01
Candidatus Bisulosaceae fam. nov.	D2472
Candidatus Bisululaceae fam. nov.	UBA6794
Candidatus Biveriaceae fam. nov.	RGZZ01
Candidatus Biveridaceae fam. nov.	GWB1-42-6
Candidatus Biverosaceae fam. nov.	UBA4778
Candidatus Bonifanaceae fam. nov.	UBA1709
Candidatus Bonifidaceae fam. nov.	JACIWP01
Candidatus Bonifosaceae fam. nov.	PWMO01
Candidatus Bonitanaceae fam. nov.	B3-G13
Candidatus Bovicellaceae fam. nov.	SHYL01
Candidatus Bovicidaceae fam. nov.	4572-78
Candidatus Bovicosaceae fam. nov.	SXIK01
Candidatus Bucelellaceae fam. nov.	GWA2-58-10
Candidatus Buceliaceae fam. nov.	JAADHH01
Candidatus Bucelosaceae fam. nov.	SHYB01
Candidatus Bucelulaceae fam. nov.	DTJE01
Candidatus Bucolariaceae fam. nov.	UBA5435
Candidatus Bucolosaceae fam. nov.	BM507
Candidatus Bucolulaceae fam. nov.	UBA1400
Candidatus Bugilellaceae fam. nov.	UBA3567
Candidatus Bugilidaceae fam. nov.	GWA2-46-15
Candidatus Bulapidaceae fam. nov.	UBA12135
Candidatus Butubariaceae fam. nov.	UBA1255
Candidatus Buxananaceae fam. nov.	MWCZ01
Candidatus Buxanellaceae fam. nov.	CACVAW01
Candidatus Buxanosaceae fam. nov.	BMS3BBIN04
Candidatus Buxanulaceae fam. nov.	2-01-FULL-45-10
Candidatus Buxifanaceae fam. nov.	RAAP-2
Candidatus Buxifiaceae fam. nov.	UBA9160
Candidatus Buxifosaceae fam. nov.	GCA-002719695
Candidatus Cacomanaceae fam. nov.	UBA10347
Candidatus Cacomariaceae fam. nov.	UBA1845
Candidatus Cacomellaceae fam. nov.	GM7ARS4
Candidatus Cacomidaceae fam. nov.	HyVt-16
Candidatus Cacomosaceae fam. nov.	CAIJYI01
Candidatus Cacopanaceae fam. nov.	JAADJB01
Candidatus Cacopiaceae fam. nov.	DTOL01
Candidatus Cadavellaceae fam. nov.	F1-80-MAGS106
Candidatus Cadaviaceae fam. nov.	CAIKAW01
Candidatus Cadavidaceae fam. nov.	DUOD01
Candidatus Cadavulaceae fam. nov.	NS-4
Candidatus Cadurellaceae fam. nov.	Ga0077560
Candidatus Cadurosaceae fam. nov.	WSZJ01
Candidatus Calipellaceae fam. nov.	UBA2247
Candidatus Calipiaceae fam. nov.	VXPQ01
Candidatus Calipidaceae fam. nov.	UBA817
Candidatus Caliposaceae fam. nov.	CAG-313
Candidatus Calipulaceae fam. nov.	VXMN01
Candidatus Canacanaceae fam. nov.	VFKH01
Candidatus Canacariaceae fam. nov.	JAACPR01
Candidatus Canaciaceae fam. nov.	QGNO01
Candidatus Canaculaceae fam. nov.	DTIZ01
Candidatus Capabanaceae fam. nov.	DRLZ01
Candidatus Capabulaceae fam. nov.	GCA-2746255
Candidatus Capilanaceae fam. nov.	UBA9933
Candidatus Capilidaceae fam. nov.	JABDLF01
Candidatus Capucanaceae fam. nov.	UBA953
Candidatus Capucariaceae fam. nov.	UBA9980
Candidatus Capucellaceae fam. nov.	SXON01
Candidatus Capuciaceae fam. nov.	UBA6594
Candidatus Capucosaceae fam. nov.	UBA2199
Candidatus Capudosaceae fam. nov.	B14-G1
Candidatus Capudulaceae fam. nov.	UBA5754
Candidatus Caravulaceae fam. nov.	CAIMUX01
Candidatus Carecariaceae fam. nov.	GPF-1
Candidatus Carecosaceae fam. nov.	UBA5633
Candidatus Careculaceae fam. nov.	VMEP01
Candidatus Carucellaceae fam. nov.	UBA1151
Candidatus Carunanaceae fam. nov.	SZUA-229
Candidatus Carunariaceae fam. nov.	GWA1-40-21
Candidatus Carunidaceae fam. nov.	FEN-943
Candidatus Carunulaceae fam. nov.	JACTMZ01
Candidatus Casabariaceae fam. nov.	GCA-00278855
Candidatus Casabellaceae fam. nov.	SZUA-149
Candidatus Caselellaceae fam. nov.	SZUA-5
Candidatus Caselidaceae fam. nov.	UBA1177
Candidatus Caselosaceae fam. nov.	4484-93
Candidatus Casigariaceae fam. nov.	UBA9089
Candidatus Casigellaceae fam. nov.	UBA927
Candidatus Casigiaceae fam. nov.	CG2-30-33-46
Candidatus Casigidaceae fam. nov.	UBA11063
Candidatus Casigosaceae fam. nov.	UBA9968
Candidatus Catabellaceae fam. nov.	UBA3031
Candidatus Catabulaceae fam. nov.	UBA3941
Candidatus Catafanaceae fam. nov.	GCA-2746425
Candidatus Catafellaceae fam. nov.	CAINMV01
Candidatus Catafosaceae fam. nov.	HRBIN34
Candidatus Cataganaceae fam. nov.	E44-bin39
Candidatus Catagariaceae fam. nov.	DTMQ01
Candidatus Catagidaceae fam. nov.	SW-4-49-11
Candidatus Cataliaceae fam. nov.	SLMS01
Candidatus Catalidaceae fam. nov.	SpSt-223
Candidatus Catalulaceae fam. nov.	BMS3Bbin05
Candidatus Catapanaceae fam. nov.	JdFR-86
Candidatus Catapariaceae fam. nov.	GCA-2715965
Candidatus Catapiaceae fam. nov.	UBA3076
Candidatus Catapidaceae fam. nov.	B12-G15
Candidatus Cataposaceae fam. nov.	CAIQCM01
Candidatus Catapulaceae fam. nov.	SXQI01
Candidatus Catecariaceae fam. nov.	UBA12049
Candidatus Categanaceae fam. nov.	2-12-FULL-49-11
Candidatus Categiaceae fam. nov.	UBA10212
Candidatus Categidaceae fam. nov.	S36-B12
Candidatus Categosaceae fam. nov.	UM-FILTER-48-10
Candidatus Categulaceae fam. nov.	JABDJR01
Candidatus Catilidaceae fam. nov.	PLA2
Candidatus Catobanaceae fam. nov.	CAISOG01
Candidatus Catobulaceae fam. nov.	2-01-FULL-52-15
Candidatus Catociaceae fam. nov.	JABDDJ01
Candidatus Catocosaceae fam. nov.	CAJBRS01
Candidatus Catoculaceae fam. nov.	VEMY01
Candidatus Celamanaceae fam. nov.	SZUA-252
Candidatus Celamariaceae fam. nov.	SPLOWO2-01-44-7
Candidatus Celamellaceae fam. nov.	B48-G9
Candidatus Celamosaceae fam. nov.	1-14-0-10-45-34
Candidatus Celamulaceae fam. nov.	DTOW01
Candidatus Celumariaceae fam. nov.	DTKO01
Candidatus Celumiaceae fam. nov.	J004
Candidatus Celumosaceae fam. nov.	CAJBMK01
Candidatus Celumulaceae fam. nov.	UBA9662
Candidatus Cemenanaceae fam. nov.	JACCYU01
Candidatus Cemenariaceae fam. nov.	JABEUL01
Candidatus Cemenidaceae fam. nov.	GCA-2861595
Candidatus Cemenosaceae fam. nov.	JAAKFQ01
Candidatus Cemenulaceae fam. nov.	PNNO01
Candidatus Cenacidaceae fam. nov.	SIO1D9
Candidatus Cenobanaceae fam. nov.	UBA932
Candidatus Cenobellaceae fam. nov.	UBA4142
Candidatus Cenobidaceae fam. nov.	DTXE01
Candidatus Cenodariaceae fam. nov.	UBA12445
Candidatus Cenodiaceae fam. nov.	OXYB2-FULL-49-7
Candidatus Cenodidaceae fam. nov.	UBA1829
Candidatus Cenodosaceae fam. nov.	F11
Candidatus Cenodulaceae fam. nov.	2-02-FULL-51-18
Candidatus Cenotiaceae fam. nov.	JAACEH01
Candidatus Cenotidaceae fam. nov.	UBA6156
Candidatus Cenotosaceae fam. nov.	SHVR01
Candidatus Cepuliaceae fam. nov.	UBA3636
Candidatus Cepuriaceae fam. nov.	UBA3532
Candidatus Cepurosaceae fam. nov.	UBA3065
Candidatus Ceracanaceae fam. nov.	T1Sed10-126
Candidatus Ceracariaceae fam. nov.	JABMOW01
Candidatus Ceracellaceae fam. nov.	UBA3637
Candidatus Ceracidaceae fam. nov.	WRIO01
Candidatus Ceracosaceae fam. nov.	Mor1
Candidatus Cerarariaceae fam. nov.	DTU065
Candidatus Cerarellaceae fam. nov.	E44-bin88
Candidatus Ceraridaceae fam. nov.	SBBL01
Candidatus Cerarosaceae fam. nov.	OSU-TB39
Candidatus Cerebidaceae fam. nov.	OMJO01
Candidatus Cerevellaceae fam. nov.	MES13
Candidatus Cereviaceae fam. nov.	UBA3496
Candidatus Cerevulaceae fam. nov.	CSSED10-376
Candidatus Cerifariaceae fam. nov.	MARSEILLE-P3954
Candidatus Cerifidaceae fam. nov.	RBG-16-58-11
Candidatus Cerifulaceae fam. nov.	JAALKR01
Candidatus Cerimariaceae fam. nov.	9FT-COMBO-42-15
Candidatus Cerimellaceae fam. nov.	SZUA-104
Candidatus Cerimiaceae fam. nov.	JACIWT01
Candidatus Ceromidaceae fam. nov.	UBA3939
Candidatus Cerucariaceae fam. nov.	JACOMY01
Candidatus Cerucellaceae fam. nov.	JAAYSF01
Candidatus Ceruciaceae fam. nov.	SLGR01
Candidatus Cetarariaceae fam. nov.	4484-213
Candidatus Cetarellaceae fam. nov.	SZUA-254
Candidatus Cetaridaceae fam. nov.	GCA-002788555
Candidatus Cetarulaceae fam. nov.	SURF-3
Candidatus Chernanaceae fam. nov.	Palsa-1180
Candidatus Cibaranaceae fam. nov.	DUMJ01
Candidatus Cibarariaceae fam. nov.	1-14-0-20-64-10
Candidatus Cibarellaceae fam. nov.	WHTK01
Candidatus Cibarosaceae fam. nov.	UBA6265
Candidatus Cibarulaceae fam. nov.	UBA9637
Candidatus Cibicellaceae fam. nov.	UBA6910
Candidatus Cibiculaceae fam. nov.	JAAYGB01
Candidatus Cicarellaceae fam. nov.	RPRI01
Candidatus Cicariaceae fam. nov.	JACNKJ01
Candidatus Cicatidaceae fam. nov.	JACIWR01
Candidatus Cicatosaceae fam. nov.	UBA8231
Candidatus Cicatulaceae fam. nov.	RSA9
Candidatus Cicilariaceae fam. nov.	SCBR16-9
Candidatus Cicilidaceae fam. nov.	SpSt-313
Candidatus Cilibariaceae fam. nov.	JAAUTE01
Candidatus Cilibellaceae fam. nov.	SM23-62
Candidatus Cilibidaceae fam. nov.	UBA922
Candidatus Cilotellaceae fam. nov.	GCA-002795985
Candidatus Cilotiaceae fam. nov.	4484-107
Candidatus Cilotulaceae fam. nov.	WYAZ01
Candidatus Cimelellaceae fam. nov.	1-14-0-20-42-13
Candidatus Cimelidaceae fam. nov.	SOKK01
Candidatus Cimelosaceae fam. nov.	PWKH01
Candidatus Ciminariaceae fam. nov.	AE-B3A
Candidatus Ciminidaceae fam. nov.	SHYO01
Candidatus Ciminosaceae fam. nov.	ARS69
Candidatus Cimitellaceae fam. nov.	DSUN01
Candidatus Cimitiaceae fam. nov.	VFHL01
Candidatus Cimitidaceae fam. nov.	WLXD01
Candidatus Cimitosaceae fam. nov.	GCA-2863065
Candidatus Cimitulaceae fam. nov.	UBA6680
Candidatus Cinefanaceae fam. nov.	RBG-13-43-22
Candidatus Cinefellaceae fam. nov.	WCHB1-27
Candidatus Cinefosaceae fam. nov.	CR04bin15
Candidatus Cinipanaceae fam. nov.	SLNR01
Candidatus Cinipariaceae fam. nov.	CACIAM-69d
Candidatus Ciniposaceae fam. nov.	BM714
Candidatus Cinipulaceae fam. nov.	SZUA-21
Candidatus Cisalanaceae fam. nov.	SXXA01
Candidatus Cisalariaceae fam. nov.	CAIQNR01
Candidatus Cisaliaceae fam. nov.	JABMQK01
Candidatus Cisoranaceae fam. nov.	RBG-16-64-43
Candidatus Cisorariaceae fam. nov.	UBA11346
Candidatus Cisoridaceae fam. nov.	UBA2174
Candidatus Citipariaceae fam. nov.	XYA12-FULL-58-9
Candidatus Citipellaceae fam. nov.	UBA961
Candidatus Citipiaceae fam. nov.	TMED25
Candidatus Citiposaceae fam. nov.	UBA8438
Candidatus Citivariaceae fam. nov.	AC-25
Candidatus Citiviaceae fam. nov.	GWA2-38-27
Candidatus Citivulaceae fam. nov.	SpSt-600
Candidatus Citocariaceae fam. nov.	UBA4971
Candidatus Citocosaceae fam. nov.	JABEVD01
Candidatus Citoculaceae fam. nov.	TMED131
Candidatus Cituvanaceae fam. nov.	HMF5848
Candidatus Cituviaceae fam. nov.	SM23-30
Candidatus Cituvosaceae fam. nov.	UBA11359
Candidatus Cobalanaceae fam. nov.	SLST01
Candidatus Cobalellaceae fam. nov.	UBA3375
Candidatus Cocibariaceae fam. nov.	JAAYLA01
Candidatus Cocibiaceae fam. nov.	CAIPTA01
Candidatus Cocibidaceae fam. nov.	GCA-002748415
Candidatus Cocibosaceae fam. nov.	CG2-30-53-67
Candidatus Cocibulaceae fam. nov.	SZUA-242
Candidatus Cocodariaceae fam. nov.	JAAXHH01
Candidatus Cocodiaceae fam. nov.	ARS1246
Candidatus Cocodidaceae fam. nov.	1-14-0-10-41-12
Candidatus Cocolellaceae fam. nov.	UBA9215
Candidatus Cocolulaceae fam. nov.	2-01-FULL-46-14
Candidatus Codifanaceae fam. nov.	2-01-FULL-47-10
Candidatus Codifellaceae fam. nov.	UBA3071
Candidatus Codifidaceae fam. nov.	SCQP01
Candidatus Cohonidaceae fam. nov.	WTJX01
Candidatus Cohonulaceae fam. nov.	JAADIA01
Candidatus Cohoranaceae fam. nov.	NPL-UPA2
Candidatus Cohorellaceae fam. nov.	JAAYUI01
Candidatus Cohorosaceae fam. nov.	Bin103
Candidatus Cohurariaceae fam. nov.	CAG-314
Candidatus Cohurellaceae fam. nov.	AWTP1-31
Candidatus Cohurosaceae fam. nov.	RPPD01
Candidatus Cohurulaceae fam. nov.	CFX8
Candidatus Colapellaceae fam. nov.	FEN-1343
Candidatus Colapiaceae fam. nov.	PWQF01
Candidatus Colapidaceae fam. nov.	PWLI01
Candidatus Colapulaceae fam. nov.	JAAZCA01
Candidatus Colepanaceae fam. nov.	CG2-30-70-394
Candidatus Colepariaceae fam. nov.	PHBI01
Candidatus Colepidaceae fam. nov.	O2-12-FULL-43-9
Candidatus Colimanaceae fam. nov.	DTPJ01
Candidatus Colimellaceae fam. nov.	UBA7883
Candidatus Colimiaceae fam. nov.	DTHC01
Candidatus Colimulaceae fam. nov.	UBA2206
Candidatus Colipanaceae fam. nov.	JADDFT01
Candidatus Colipariaceae fam. nov.	CAG-272
Candidatus Colipellaceae fam. nov.	JAACEG01
Candidatus Colipiaceae fam. nov.	SURF-26
Candidatus Coliposaceae fam. nov.	NDHX01
Candidatus Colipulaceae fam. nov.	FW602-bin22
Candidatus Colopariaceae fam. nov.	2-02-FULL-35-15
Candidatus Coloposaceae fam. nov.	JAAXGF01
Candidatus Colubanaceae fam. nov.	UBA2165
Candidatus Colubidaceae fam. nov.	C00003060
Candidatus Colubulaceae fam. nov.	B4-G1
Candidatus Colutidaceae fam. nov.	UBA2364
Candidatus Colutulaceae fam. nov.	PALSA-1337
Candidatus Conabanaceae fam. nov.	CSP1-6
Candidatus Conabidaceae fam. nov.	JABDGR01
Candidatus Conabulaceae fam. nov.	FEN-1388
Candidatus Conamariaceae fam. nov.	UBA6940
Candidatus Conamulaceae fam. nov.	GWA2-42-14
Candidatus Conarariaceae fam. nov.	SHXO01
Candidatus Conaridaceae fam. nov.	B36-G15
Candidatus Conarosaceae fam. nov.	GCA-2717565
Candidatus Conarulaceae fam. nov.	SpSt-1174
Candidatus Conibanaceae fam. nov.	JABCYS01
Candidatus Conibellaceae fam. nov.	UBA9216
Candidatus Conibiaceae fam. nov.	T1SED10-24
Candidatus Conifellaceae fam. nov.	UBA1144
Candidatus Conifulaceae fam. nov.	DTYK01
Candidatus Coniganaceae fam. nov.	UBA2156
Candidatus Conigosaceae fam. nov.	B30-G16
Candidatus Conigulaceae fam. nov.	21-14-0-10-42-9
Candidatus Coninidaceae fam. nov.	QIAW01
Candidatus Coninulaceae fam. nov.	GCA-2709665
Candidatus Conipanaceae fam. nov.	JABMQX01
Candidatus Conipariaceae fam. nov.	UBA3002
Candidatus Conipellaceae fam. nov.	JAAXIE01
Candidatus Conipiaceae fam. nov.	GCA-002707645
Candidatus Conipulaceae fam. nov.	GCA-2400775
Candidatus Conopidaceae fam. nov.	UBA8363
Candidatus Conopulaceae fam. nov.	RGVZ01
Candidatus Conubanaceae fam. nov.	VXPW01
Candidatus Conubulaceae fam. nov.	UBA6899
Candidatus Corocanaceae fam. nov.	UMGS416
Candidatus Corocariaceae fam. nov.	BM004
Candidatus Corocidaceae fam. nov.	UM-FILTER-41-14
Candidatus Corocosaceae fam. nov.	SZUA-161
Candidatus Cosidariaceae fam. nov.	SKZP01
Candidatus Cosididaceae fam. nov.	JAAXVQ01
Candidatus Cosidosaceae fam. nov.	UBA1877
Candidatus Cosidulaceae fam. nov.	CAIMLA01
Candidatus Cosiganaceae fam. nov.	Ch109
Candidatus Cosigariaceae fam. nov.	GWF2-38-335
Candidatus Cosigellaceae fam. nov.	DTGC01
Candidatus Cosigosaceae fam. nov.	4572-128
Candidatus Coteniaceae fam. nov.	UBA5352
Candidatus Cotenidaceae fam. nov.	SXHM01
Candidatus Coturanaceae fam. nov.	UBA816
Candidatus Coturariaceae fam. nov.	CACZYB01
Candidatus Coturellaceae fam. nov.	UBA9506
Candidatus Coturiaceae fam. nov.	BLZN01
Candidatus Coturidaceae fam. nov.	2013Ark19i
Candidatus Coturulaceae fam. nov.	QOAS01
Candidatus Cucurariaceae fam. nov.	UBA1398
Candidatus Cucurellaceae fam. nov.	Ch66
Candidatus Cucurosaceae fam. nov.	CAIRSR01
Candidatus Cucurulaceae fam. nov.	2-02-FULL-67-57
Candidatus Cuferanaceae fam. nov.	Bin76
Candidatus Cuferariaceae fam. nov.	UBA5368
Candidatus Cuferidaceae fam. nov.	J094
Candidatus Culibanaceae fam. nov.	DRBW01
Candidatus Culibellaceae fam. nov.	UBA6906
Candidatus Culibidaceae fam. nov.	B119-G9
Candidatus Culibulaceae fam. nov.	UBA3088
Candidatus Culigidaceae fam. nov.	1-14-0-10-42-19
Candidatus Culigosaceae fam. nov.	Bog-877
Candidatus Culigulaceae fam. nov.	1-14-0-20-47-16
Candidatus Culilariaceae fam. nov.	UBA8481
Candidatus Culilellaceae fam. nov.	UBA1396
Candidatus Culilidaceae fam. nov.	YD0425bin51
Candidatus Culilosaceae fam. nov.	UBA8522
Candidatus Cululanaceae fam. nov.	UBA5301
Candidatus Cululariaceae fam. nov.	SHND01
Candidatus Cululellaceae fam. nov.	JACIXR01
Candidatus Cululidaceae fam. nov.	QQVD01
Candidatus Cululosaceae fam. nov.	FEN-1099
Candidatus Culululaceae fam. nov.	GCA-2401445
Candidatus Cunabariaceae fam. nov.	DUSP01
Candidatus Cunabidaceae fam. nov.	DC0425bin3
Candidatus Curabariaceae fam. nov.	JABCZS01
Candidatus Curabiaceae fam. nov.	GCA-002785045
Candidatus Curacanaceae fam. nov.	CADDZG01
Candidatus Curacellaceae fam. nov.	HGW-17
Candidatus Curaciaceae fam. nov.	CG2-30-66-41
Candidatus Curacidaceae fam. nov.	54-19
Candidatus Curacosaceae fam. nov.	UBA2169
Candidatus Curotiaceae fam. nov.	SZUA-140
Candidatus Curotulaceae fam. nov.	UBA6264
Candidatus Cuticanaceae fam. nov.	GCA-002780085
Candidatus Cuticariaceae fam. nov.	UBA10450
Candidatus Cuticiaceae fam. nov.	JACMRI01
Candidatus Cuticidaceae fam. nov.	SZUA-47
Candidatus Cuticosaceae fam. nov.	GWF2-33-10
Candidatus Daducariaceae fam. nov.	CSBR16-119
Candidatus Dapifanaceae fam. nov.	WVWN01
Candidatus Dapifariaceae fam. nov.	2-02-FULL-48-12
Candidatus Dapifidaceae fam. nov.	AK92
Candidatus Dapifosaceae fam. nov.	UBA5453
Candidatus Dapifulaceae fam. nov.	HGW-15
Candidatus Debucariaceae fam. nov.	REDH01
Candidatus Decacariaceae fam. nov.	SPBP01
Candidatus Decaciaceae fam. nov.	UBA941
Candidatus Decacidaceae fam. nov.	UMGS1388
Candidatus Decacosaceae fam. nov.	GCA-2747255
Candidatus Decaculaceae fam. nov.	GWF2-50-93
Candidatus Decamariaceae fam. nov.	CADEGL01
Candidatus Decamosaceae fam. nov.	SLSP01
Candidatus Decapanaceae fam. nov.	DREG01
Candidatus Decapiaceae fam. nov.	UBA1997
Candidatus Decapidaceae fam. nov.	SHYC01
Candidatus Decapulaceae fam. nov.	SURF-13
Candidatus Decatidaceae fam. nov.	B39-G9
Candidatus Decatulaceae fam. nov.	SW-6-46-9
Candidatus Dececanaceae fam. nov.	VXOZ01
Candidatus Dececellaceae fam. nov.	CG1-02-40-25
Candidatus Dececiaceae fam. nov.	DUEL01
Candidatus Dececosaceae fam. nov.	SMXS01
Candidatus Decenellaceae fam. nov.	UBA8366
Candidatus Decenosaceae fam. nov.	UBA8346
Candidatus Deciniaceae fam. nov.	DTRM01
Candidatus Decinosaceae fam. nov.	GWA2-38-13
Candidatus Decinulaceae fam. nov.	PGYV01
Candidatus Decitellaceae fam. nov.	Kazan-3B-28
Candidatus Decitidaceae fam. nov.	AB1-6
Candidatus Decitosaceae fam. nov.	J103
Candidatus Decomariaceae fam. nov.	UBA8108
Candidatus Decomulaceae fam. nov.	UBA6911
Candidatus Decuciaceae fam. nov.	DRYI01
Candidatus Decucidaceae fam. nov.	CAILUR01
Candidatus Decuniaceae fam. nov.	QAMH01
Candidatus Decunidaceae fam. nov.	Fen-1364
Candidatus Decunulaceae fam. nov.	QNDG01
Candidatus Decupanaceae fam. nov.	UBA5680
Candidatus Decupulaceae fam. nov.	Pan216
Candidatus Dedigariaceae fam. nov.	SBBT01
Candidatus Dedigellaceae fam. nov.	RBG-16-64-32
Candidatus Defacanaceae fam. nov.	CAIKKV01
Candidatus Defacellaceae fam. nov.	XYC2-FULL-47-12
Candidatus Defacidaceae fam. nov.	CLD3
Candidatus Defacosaceae fam. nov.	JACCXN01
Candidatus Defaculaceae fam. nov.	GWF2-39-127
Candidatus Defalariaceae fam. nov.	MVZB01
Candidatus Defalidaceae fam. nov.	XYA2-FULL-47-53
Candidatus Defananaceae fam. nov.	CADEHE01
Candidatus Defanariaceae fam. nov.	GCA-2721815
Candidatus Defaniaceae fam. nov.	UBA1096
Candidatus Defaranaceae fam. nov.	UBA1544
Candidatus Defarariaceae fam. nov.	JAADEI01
Candidatus Defarosaceae fam. nov.	DTU030
Candidatus Defarulaceae fam. nov.	JACESI01
Candidatus Defasiaceae fam. nov.	UMGS1883
Candidatus Defetellaceae fam. nov.	BM103
Candidatus Defetiaceae fam. nov.	BM002
Candidatus Defetidaceae fam. nov.	JABMRN01
Candidatus Defetulaceae fam. nov.	SKKL01
Candidatus Deforanaceae fam. nov.	CAIJMQ01
Candidatus Deforariaceae fam. nov.	UBA5272
Candidatus Deforosaceae fam. nov.	JAAZAB01
Candidatus Defosariaceae fam. nov.	JABMQH01
Candidatus Defosellaceae fam. nov.	DTU080
Candidatus Defosiaceae fam. nov.	PXBB01
Candidatus Defosidaceae fam. nov.	DTU086
Candidatus Defulariaceae fam. nov.	JABEVK01
Candidatus Defuliaceae fam. nov.	UBA12178
Candidatus Defulosaceae fam. nov.	XYB1-36-10
Candidatus Defunellaceae fam. nov.	2-12-FULL-50-11
Candidatus Dehinanaceae fam. nov.	OLB16
Candidatus Dehinariaceae fam. nov.	NORP154
Candidatus Dehinulaceae fam. nov.	SKNL01
Candidatus Dehisanaceae fam. nov.	GBS-1
Candidatus Dehonanaceae fam. nov.	UBA12225
Candidatus Dehonariaceae fam. nov.	UMGS1810
Candidatus Dehonellaceae fam. nov.	UBA994
Candidatus Dehonosaceae fam. nov.	JABMPQ01
Candidatus Delacellaceae fam. nov.	JACDFO01
Candidatus Delacidaceae fam. nov.	DSAB01
Candidatus Delaculaceae fam. nov.	JABMRT01
Candidatus Delapanaceae fam. nov.	UBA12532
Candidatus Delapellaceae fam. nov.	4484-211
Candidatus Delapiaceae fam. nov.	Rs-D84
Candidatus Delebidaceae fam. nov.	Ga0077536
Candidatus Delecellaceae fam. nov.	XYD1-FULL-40-9
Candidatus Delubanaceae fam. nov.	UBA5859
Candidatus Delubariaceae fam. nov.	02-FULL-45-10c
Candidatus Delubellaceae fam. nov.	SBBF01
Candidatus Delucariaceae fam. nov.	XYA2-FULL-39-19
Candidatus Delucosaceae fam. nov.	DUMU01
Candidatus Demadariaceae fam. nov.	1-14-0-10-43-13
Candidatus Demadidaceae fam. nov.	YB12-FULL-65-16
Candidatus Demagariaceae fam. nov.	UBA1449
Candidatus Demagidaceae fam. nov.	UBA2995
Candidatus Demagosaceae fam. nov.	GCA-2748055
Candidatus Demagulaceae fam. nov.	JABABV01
Candidatus Demigiaceae fam. nov.	JACOND01
Candidatus Demigidaceae fam. nov.	UBA1172
Candidatus Democariaceae fam. nov.	GWA2-46-9
Candidatus Democellaceae fam. nov.	UBA1532
Candidatus Democosaceae fam. nov.	DTKC01
Candidatus Democulaceae fam. nov.	SCN-69-37
Candidatus Demogosaceae fam. nov.	UBA8477
Candidatus Demogulaceae fam. nov.	JAAYIR01
Candidatus Demulanaceae fam. nov.	UBA12409
Candidatus Demulariaceae fam. nov.	UBA7887
Candidatus Demulidaceae fam. nov.	GCA-2729495
Candidatus Demululaceae fam. nov.	RBG-16-64-13
Candidatus Denavanaceae fam. nov.	JAAEKA01
Candidatus Denaviaceae fam. nov.	UBA2428
Candidatus Denavidaceae fam. nov.	DTLA01
Candidatus Denavulaceae fam. nov.	XYA2-FULL-43-10
Candidatus Denecanaceae fam. nov.	Pb10988
Candidatus Denecellaceae fam. nov.	UBA1546
Candidatus Deneciaceae fam. nov.	UBA5629
Candidatus Denicellaceae fam. nov.	2-02-FULL-58-16
Candidatus Denicidaceae fam. nov.	UBA6624
Candidatus Denicosaceae fam. nov.	UBA920
Candidatus Deniculaceae fam. nov.	SHYT01
Candidatus Deniganaceae fam. nov.	CAIRYL01
Candidatus Denigellaceae fam. nov.	CAIWXX01
Candidatus Denigosaceae fam. nov.	JAABPS01
Candidatus Denixellaceae fam. nov.	RUG033
Candidatus Denixiaceae fam. nov.	UBA228
Candidatus Denixidaceae fam. nov.	2-01-FULL-59-12
Candidatus Denixulaceae fam. nov.	JAAYCJ01
Candidatus Denomariaceae fam. nov.	CAIKAF01
Candidatus Denomiaceae fam. nov.	JAADDB01
Candidatus Denomosaceae fam. nov.	JABDQB01
Candidatus Denomulaceae fam. nov.	UBA6257
Candidatus Denoriaceae fam. nov.	UBA12327
Candidatus Denoridaceae fam. nov.	FEB-10
Candidatus Denorosaceae fam. nov.	BM523
Candidatus Denunellaceae fam. nov.	UMGS1783
Candidatus Denunidaceae fam. nov.	CF-107
Candidatus Denunulaceae fam. nov.	SURF-7
Candidatus Denupanaceae fam. nov.	SICC01
Candidatus Denupulaceae fam. nov.	CAIOMD01
Candidatus Depacidaceae fam. nov.	UBA1429
Candidatus Deparellaceae fam. nov.	DT-59
Candidatus Deparidaceae fam. nov.	UMGS1260
Candidatus Deparosaceae fam. nov.	J102
Candidatus Depasariaceae fam. nov.	SLCP01
Candidatus Depasidaceae fam. nov.	WTBG01
Candidatus Depasosaceae fam. nov.	CAIXZF01
Candidatus Depecariaceae fam. nov.	WRLR01
Candidatus Depecellaceae fam. nov.	RFSG01
Candidatus Depeciaceae fam. nov.	UBA2279
Candidatus Depecosaceae fam. nov.	SM1-73
Candidatus Depelidaceae fam. nov.	DTU022
Candidatus Depelulaceae fam. nov.	XYB2-FULL-49-35
Candidatus Depetariaceae fam. nov.	UBA9649
Candidatus Depicariaceae fam. nov.	GCA-2792135
Candidatus Depicidaceae fam. nov.	JACMPN01
Candidatus Depicosaceae fam. nov.	AAA536-G10
Candidatus Depocellaceae fam. nov.	SM23-73-2
Candidatus Depocosaceae fam. nov.	UBA4473
Candidatus Depoposaceae fam. nov.	PH28-bin88
Candidatus Depubanaceae fam. nov.	0-14-0-80-60-11
Candidatus Depubiaceae fam. nov.	UBA8154
Candidatus Depubidaceae fam. nov.	QAMX01
Candidatus Depubosaceae fam. nov.	JACNGX01
Candidatus Depupariaceae fam. nov.	T3Sed10-336
Candidatus Depupellaceae fam. nov.	UBA8416
Candidatus Depupiaceae fam. nov.	RBG-16-64-22
Candidatus Depupidaceae fam. nov.	JABDEC01
Candidatus Depuposaceae fam. nov.	UBA6915
Candidatus Derecellaceae fam. nov.	79-D21
Candidatus Dereciaceae fam. nov.	UM-FILTER-36-11
Candidatus Derecosaceae fam. nov.	DTDR01
Candidatus Derelariaceae fam. nov.	Cfx3-03
Candidatus Derelellaceae fam. nov.	SCTD01
Candidatus Dereliaceae fam. nov.	UBA6595
Candidatus Derelosaceae fam. nov.	UBA10003
Candidatus Derunanaceae fam. nov.	UBA8898
Candidatus Derunariaceae fam. nov.	DG-60
Candidatus Derunellaceae fam. nov.	UM-FILTER-39-15
Candidatus Derunidaceae fam. nov.	JABLXN01
Candidatus Derunosaceae fam. nov.	UCB3
Candidatus Desacanaceae fam. nov.	DTU029
Candidatus Desaciaceae fam. nov.	UBA7430
Candidatus Desepellaceae fam. nov.	PUNB01
Candidatus Desepiaceae fam. nov.	J057
Candidatus Desepulaceae fam. nov.	RUG11792
Candidatus Desomanaceae fam. nov.	UBA11717
Candidatus Desomariaceae fam. nov.	GCA-002720895
Candidatus Desomellaceae fam. nov.	PEYW01
Candidatus Desomiaceae fam. nov.	DTZQ01
Candidatus Desomidaceae fam. nov.	SCQA01
Candidatus Desonellaceae fam. nov.	AABM5-125-24
Candidatus Desonosaceae fam. nov.	AC-14
Candidatus Desorariaceae fam. nov.	UBA1018
Candidatus Desucellaceae fam. nov.	UBA1234
Candidatus Desuciaceae fam. nov.	CG2-30-49-12
Candidatus Desucosaceae fam. nov.	DUQP01
Candidatus Desulidaceae fam. nov.	JdFR-97
Candidatus Desupariaceae fam. nov.	HR10
Candidatus Desupellaceae fam. nov.	WHST01
Candidatus Desuposaceae fam. nov.	GCA-2686955
Candidatus Desurariaceae fam. nov.	2-02-FULL-50-9b
Candidatus Desurellaceae fam. nov.	UBA12405
Candidatus Desuriaceae fam. nov.	UBA917
Candidatus Desuridaceae fam. nov.	CG1-02-47-37
Candidatus Desurulaceae fam. nov.	DUZI01
Candidatus Detecariaceae fam. nov.	WPAF01
Candidatus Detenellaceae fam. nov.	UBA2770
Candidatus Deteniaceae fam. nov.	MVZH01
Candidatus Detepidaceae fam. nov.	UBA10025
Candidatus Deteposaceae fam. nov.	CSP1-2
Candidatus Detorariaceae fam. nov.	J040
Candidatus Detoridaceae fam. nov.	JABDET01
Candidatus Detosariaceae fam. nov.	SHVT01
Candidatus Detosidaceae fam. nov.	UBA8153
Candidatus Detososaceae fam. nov.	VMGY01
Candidatus Detotidaceae fam. nov.	SHXV01
Candidatus Detotosaceae fam. nov.	UBA7960
Candidatus Detotulaceae fam. nov.	QYQD01
Candidatus Detumanaceae fam. nov.	PWXJ01
Candidatus Detumellaceae fam. nov.	CAIJZX01
Candidatus Detumiaceae fam. nov.	MB11C04
Candidatus Detumosaceae fam. nov.	JABDBP01
Candidatus Detuniaceae fam. nov.	JABUFB01
Candidatus Deveciaceae fam. nov.	UBA7702
Candidatus Devecidaceae fam. nov.	CADCWN01
Candidatus Devecosaceae fam. nov.	PHOS-HE28
Candidatus Deveculaceae fam. nov.	RSA17
Candidatus Dibapariaceae fam. nov.	UBA3824
Candidatus Dibapellaceae fam. nov.	21-14-all-47-15
Candidatus Dibapiaceae fam. nov.	2-01-FULL-39-33
Candidatus Dibapulaceae fam. nov.	UBA11657
Candidatus Dicabanaceae fam. nov.	UBA8524
Candidatus Dicabidaceae fam. nov.	SG8-4
Candidatus Dicabosaceae fam. nov.	SICP01
Candidatus Dicananaceae fam. nov.	HyVt-429
Candidatus Dicibanaceae fam. nov.	UBA2136
Candidatus Dicibariaceae fam. nov.	CAIOZP01
Candidatus Dicibellaceae fam. nov.	UBA10009
Candidatus Dicibiaceae fam. nov.	UBA1390
Candidatus Dicibidaceae fam. nov.	CAIYGI01
Candidatus Dicibosaceae fam. nov.	JAABRJ01
Candidatus Dicibulaceae fam. nov.	SMYD01
Candidatus Dicimariaceae fam. nov.	GCA-2687025
Candidatus Dicimiaceae fam. nov.	DTKB01
Candidatus Dicimidaceae fam. nov.	UBA1402
Candidatus Dicimosaceae fam. nov.	CAILMK01
Candidatus Didacanaceae fam. nov.	DRMV01
Candidatus Didacariaceae fam. nov.	FEN-1173
Candidatus Didacellaceae fam. nov.	UBA1135
Candidatus Didaciaceae fam. nov.	UBA8919
Candidatus Didacidaceae fam. nov.	QHCE01
Candidatus Didacosaceae fam. nov.	CAIPRZ01
Candidatus Dilaculaceae fam. nov.	UBA7683
Candidatus Dileculaceae fam. nov.	JABDDW01
Candidatus Dilemanaceae fam. nov.	BHER01
Candidatus Dilemariaceae fam. nov.	Bin34
Candidatus Dilemellaceae fam. nov.	CAIYCZ01
Candidatus Dilemiaceae fam. nov.	GM7GCV1
Candidatus Dilemosaceae fam. nov.	SMXR01
Candidatus Dilibanaceae fam. nov.	JdFR-78
Candidatus Dilibariaceae fam. nov.	WRDA01
Candidatus Dilicanaceae fam. nov.	SKLO01
Candidatus Dilicellaceae fam. nov.	UBA7541
Candidatus Dilicidaceae fam. nov.	SLAA01
Candidatus Diloganaceae fam. nov.	SHXW01
Candidatus Dilogellaceae fam. nov.	DRME01
Candidatus Dilogidaceae fam. nov.	JACCXV01
Candidatus Dilogosaceae fam. nov.	UBA9629
Candidatus Dilogulaceae fam. nov.	Bin125
Candidatus Diludanaceae fam. nov.	SG8-41
Candidatus Diludidaceae fam. nov.	WQYP01
Candidatus Diluvidaceae fam. nov.	J042
Candidatus Dimacanaceae fam. nov.	UBA9673
Candidatus Dimacariaceae fam. nov.	JAAYKD01
Candidatus Dimacellaceae fam. nov.	SURF-38
Candidatus Dimaciaceae fam. nov.	DSWB01
Candidatus Dimacidaceae fam. nov.	GCA-2711565
Candidatus Dimaculaceae fam. nov.	CF-72
Candidatus Dimadanaceae fam. nov.	CAG-917
Candidatus Dimadariaceae fam. nov.	QNBC01
Candidatus Dimadellaceae fam. nov.	HRbin24
Candidatus Dimidanaceae fam. nov.	PEYH01
Candidatus Dimidellaceae fam. nov.	UBA2962
Candidatus Dimidosaceae fam. nov.	CSBR16-193
Candidatus Diminanaceae fam. nov.	JAADFF01
Candidatus Diminidaceae fam. nov.	UBA5214
Candidatus Dinupanaceae fam. nov.	QAND01
Candidatus Dinupellaceae fam. nov.	DUUL01
Candidatus Dinuposaceae fam. nov.	UBA2966
Candidatus Dinupulaceae fam. nov.	UBA12508
Candidatus Diponanaceae fam. nov.	Palsa-965
Candidatus Diponellaceae fam. nov.	UKL13-2
Candidatus Diponiaceae fam. nov.	JABMQR01
Candidatus Diponidaceae fam. nov.	UBA1163
Candidatus Direcidaceae fam. nov.	UBA2593
Candidatus Direculaceae fam. nov.	J045
Candidatus Direpellaceae fam. nov.	PALSA-610
Candidatus Direpidaceae fam. nov.	UBA3940
Candidatus Direposaceae fam. nov.	JABLXH01
Candidatus Direpulaceae fam. nov.	IMCC2047
Candidatus Diritellaceae fam. nov.	DSOQ01
Candidatus Diritidaceae fam. nov.	WRBF01
Candidatus Diritosaceae fam. nov.	UBA12170
Candidatus Disidanaceae fam. nov.	SLTJ01
Candidatus Disidariaceae fam. nov.	UBA1551
Candidatus Disidellaceae fam. nov.	XYD1-FULL-46-19
Candidatus Divolariaceae fam. nov.	JA-3-3Ab
Candidatus Divolellaceae fam. nov.	UBA5177
Candidatus Divolidaceae fam. nov.	DTEH01
Candidatus Divolosaceae fam. nov.	QOAV01
Candidatus Divorellaceae fam. nov.	Fen-181
Candidatus Divoridaceae fam. nov.	CADCTF01
Candidatus Divorosaceae fam. nov.	UBA10348
Candidatus Divulellaceae fam. nov.	UBA5976
Candidatus Divulosaceae fam. nov.	UBA4068
Candidatus Divululaceae fam. nov.	UBA5603
Candidatus Docibanaceae fam. nov.	UBA2245
Candidatus Docibariaceae fam. nov.	Fen-1342
Candidatus Docibulaceae fam. nov.	SZUA-152
Candidatus Documariaceae fam. nov.	WVXT01
Candidatus Documosaceae fam. nov.	SZUA-191
Candidatus Domabariaceae fam. nov.	SIBH01
Candidatus Domabidaceae fam. nov.	CAIYYI01
Candidatus Domicariaceae fam. nov.	SKKY01
Candidatus Domicosaceae fam. nov.	UBA10183
Candidatus Domiculaceae fam. nov.	2-01-FULL-39-13
Candidatus Domigidaceae fam. nov.	GWA2-32-17
Candidatus Domigosaceae fam. nov.	UBA10199
Candidatus Domigulaceae fam. nov.	WLWR01
Candidatus Domipanaceae fam. nov.	DTU049
Candidatus Domipidaceae fam. nov.	XYC2-FULL-46-14
Candidatus Doxolanaceae fam. nov.	B21-G16
Candidatus Doxolariaceae fam. nov.	UBA6077
Candidatus Doxolellaceae fam. nov.	UBA1908
Candidatus Doxolidaceae fam. nov.	UBA2128
Candidatus Doxolosaceae fam. nov.	JAAUUE01
Candidatus Ducilanaceae fam. nov.	GWA2-38-11
Candidatus Ducilariaceae fam. nov.	SHLN01
Candidatus Duciliaceae fam. nov.	2-01-FULL-66-17
Candidatus Ducilidaceae fam. nov.	DTU010
Candidatus Duponariaceae fam. nov.	2-02-FULL-44-16
Candidatus Duponiaceae fam. nov.	ZC4RG38
Candidatus Duponidaceae fam. nov.	4484-95
Candidatus Dupunanaceae fam. nov.	GCA-2699445
Candidatus Dupunellaceae fam. nov.	UBA4821
Candidatus Dupunidaceae fam. nov.	JAADFP01
Candidatus Dupunosaceae fam. nov.	CAITUY01
Candidatus Duricellaceae fam. nov.	GCA-2701885
Candidatus Duricidaceae fam. nov.	BACL11
Candidatus Effigidaceae fam. nov.	Palsa-1104
Candidatus Exsanellaceae fam. nov.	Fen-336
Candidatus Facunulaceae fam. nov.	UBA4486
Candidatus Famelosaceae fam. nov.	CAIXTV01
Candidatus Famelulaceae fam. nov.	PWVN01
Candidatus Faticariaceae fam. nov.	UBA11712
Candidatus Fatifanaceae fam. nov.	UBA11393
Candidatus Fatifariaceae fam. nov.	Fen-1058
Candidatus Fatifellaceae fam. nov.	UM-FILTER-40-11
Candidatus Fatifosaceae fam. nov.	UBA1212
Candidatus Fatifulaceae fam. nov.	JAAZOE01
Candidatus Fatilariaceae fam. nov.	46-47
Candidatus Fatilellaceae fam. nov.	UBA9655
Candidatus Fatilidaceae fam. nov.	T1SED10-28
Candidatus Fatilulaceae fam. nov.	CAITNO01
Candidatus Favilellaceae fam. nov.	2-02-FULL-40-11
Candidatus Favilidaceae fam. nov.	UBA5542
Candidatus Favonariaceae fam. nov.	JAADGE01
Candidatus Favonellaceae fam. nov.	UBA10066
Candidatus Feculanaceae fam. nov.	GCA-002773005
Candidatus Feculidaceae fam. nov.	B5-G15
Candidatus Fecululaceae fam. nov.	UBA1319
Candidatus Fecunanaceae fam. nov.	CAINNR01
Candidatus Fecunellaceae fam. nov.	UBA6898
Candidatus Fecunosaceae fam. nov.	QHBQ01
Candidatus Fecunulaceae fam. nov.	SURF-5
Candidatus Feditanaceae fam. nov.	WOZS01
Candidatus Feditellaceae fam. nov.	CAIQBE01
Candidatus Feditidaceae fam. nov.	RUG12999
Candidatus Feditosaceae fam. nov.	UBA2466
Candidatus Feditulaceae fam. nov.	SM23-31
Candidatus Fefelariaceae fam. nov.	CAIMVM01
Candidatus Fefelulaceae fam. nov.	UBA6729
Candidatus Feficariaceae fam. nov.	UBA11386
Candidatus Feficellaceae fam. nov.	UBA5745
Candidatus Feficidaceae fam. nov.	UBA8649
Candidatus Feficosaceae fam. nov.	UBA7950
Candidatus Femelariaceae fam. nov.	UBA2766
Candidatus Femeliaceae fam. nov.	SURF-40
Candidatus Femelosaceae fam. nov.	JACDGC01
Candidatus Femelulaceae fam. nov.	CG2-30-39-44
Candidatus Fetifanaceae fam. nov.	UBA11236
Candidatus Fetifosaceae fam. nov.	MHYJ01
Candidatus Fetifulaceae fam. nov.	UBA2386
Candidatus Fetuliaceae fam. nov.	CAIUPP01
Candidatus Fetulidaceae fam. nov.	UTPRO1
Candidatus Fetutanaceae fam. nov.	UBA9339
Candidatus Fetutidaceae fam. nov.	SBAT01
Candidatus Fetutosaceae fam. nov.	JABWBI01
Candidatus Fibicariaceae fam. nov.	HGM11417
Candidatus Fibiciaceae fam. nov.	GWA2-73-35
Candidatus Fibicidaceae fam. nov.	GWF2-38-69
Candidatus Ficediaceae fam. nov.	HGM11327
Candidatus Ficedosaceae fam. nov.	JACMRA01
Candidatus Ficulanaceae fam. nov.	UBA9159
Candidatus Ficulariaceae fam. nov.	UBA7805
Candidatus Fidenanaceae fam. nov.	DUPQ01
Candidatus Fidenariaceae fam. nov.	UBA4092
Candidatus Fidenellaceae fam. nov.	GWA2-35-9
Candidatus Fiducariaceae fam. nov.	UBA6927
Candidatus Fiducellaceae fam. nov.	HRBIN23
Candidatus Fiducosaceae fam. nov.	2-01-FULL-45-11
Candidatus Figilanaceae fam. nov.	CAIODY01
Candidatus Figilulaceae fam. nov.	UBA5755
Candidatus Forabariaceae fam. nov.	SKZT01
Candidatus Forabellaceae fam. nov.	UBA4661
Candidatus Forabiaceae fam. nov.	2-02-FULL-48-14
Candidatus Forabidaceae fam. nov.	UBA5852
Candidatus Foricariaceae fam. nov.	RUG730
Candidatus Foricellaceae fam. nov.	AA152
Candidatus Forinanaceae fam. nov.	CG1-02-43-26
Candidatus Forinellaceae fam. nov.	DRLW01
Candidatus Forinidaceae fam. nov.	SLFE01
Candidatus Forinosaceae fam. nov.	SM23-61
Candidatus Forinulaceae fam. nov.	D1FN1-002
Candidatus Fuliganaceae fam. nov.	UBA3569
Candidatus Fuligidaceae fam. nov.	JABMRG01
Candidatus Fuligosaceae fam. nov.	B26-G2
Candidatus Fumacariaceae fam. nov.	XYC2-FULL-37-10
Candidatus Fumacellaceae fam. nov.	JACDCP01
Candidatus Fumaciaceae fam. nov.	CAJCIY01
Candidatus Fumacosaceae fam. nov.	JABSSG01
Candidatus Fumifariaceae fam. nov.	UBA6615
Candidatus Fumifiaceae fam. nov.	SB21
Candidatus Fumifidaceae fam. nov.	DTFT01
Candidatus Fumifulaceae fam. nov.	VMGT01
Candidatus Funamanaceae fam. nov.	UBA2233
Candidatus Funamiaceae fam. nov.	UBA7656
Candidatus Funamidaceae fam. nov.	MedAcidi-G1
Candidatus Funamosaceae fam. nov.	BuS5
Candidatus Funamulaceae fam. nov.	GWF1-51-8
Candidatus Funebellaceae fam. nov.	CAIQCK01
Candidatus Funebiaceae fam. nov.	2-02-FULL-50-16-A
Candidatus Funebosaceae fam. nov.	WGA-3G
Candidatus Funivariaceae fam. nov.	RBG-16-54-18
Candidatus Funivellaceae fam. nov.	WTKD01
Candidatus Furibidaceae fam. nov.	UBA6266
Candidatus Fusifanaceae fam. nov.	CAACVY01
Candidatus Fusifulaceae fam. nov.	TMED113
Candidatus Futatariaceae fam. nov.	SURF-12
Candidatus Futatosaceae fam. nov.	SURF-15
Candidatus Futatulaceae fam. nov.	UBA12481
Candidatus Gabinosaceae fam. nov.	UBA7879
Candidatus Gasifanaceae fam. nov.	UBA11471
Candidatus Gasifiaceae fam. nov.	32-111
Candidatus Gasifosaceae fam. nov.	DTYH01
Candidatus Gasifulaceae fam. nov.	JAAZEB01
Candidatus Gasomanaceae fam. nov.	WLWN01
Candidatus Gasomellaceae fam. nov.	UBA5616
Candidatus Gasomulaceae fam. nov.	JAADFJ01
Candidatus Gemebariaceae fam. nov.	CAFBRK01
Candidatus Gemebiaceae fam. nov.	UBA9547
Candidatus Gemebidaceae fam. nov.	DRXL01
Candidatus Gemebosaceae fam. nov.	UBA9088
Candidatus Genocariaceae fam. nov.	UBA5862
Candidatus Genociaceae fam. nov.	UBA5518
Candidatus Genoculaceae fam. nov.	VFKW01
Candidatus Genufanaceae fam. nov.	PLA5
Candidatus Genufellaceae fam. nov.	SIRW01
Candidatus Genufiaceae fam. nov.	SLRQ01
Candidatus Genufidaceae fam. nov.	J090
Candidatus Genufulaceae fam. nov.	WRLA01
Candidatus Gerunidaceae fam. nov.	FEN-1346
Candidatus Gerunulaceae fam. nov.	JACDCH01
Candidatus Giganellaceae fam. nov.	DSYF01
Candidatus Giganulaceae fam. nov.	UBA4767
Candidatus Habacariaceae fam. nov.	DRLM01
Candidatus Habacidaceae fam. nov.	UBA4823
Candidatus Habacosaceae fam. nov.	2-12-FULL-54-10
Candidatus Habaculaceae fam. nov.	JABMRZ01
Candidatus Halucellaceae fam. nov.	UBA12454
Candidatus Halucidaceae fam. nov.	JAAYKM01
Candidatus Haluculaceae fam. nov.	CF-121
Candidatus Haricanaceae fam. nov.	UBA2210
Candidatus Hariciaceae fam. nov.	UBA1161
Candidatus Haricosaceae fam. nov.	BMS3Abin05
Candidatus Hecatariaceae fam. nov.	SXRF01
Candidatus Hecatiaceae fam. nov.	CSP1-4
Candidatus Hecatidaceae fam. nov.	CACJXQ01
Candidatus Hecatosaceae fam. nov.	SM23-28-2
Candidatus Hecatulaceae fam. nov.	UBA2143
Candidatus Hegumiaceae fam. nov.	BY39
Candidatus Hegumidaceae fam. nov.	J025
Candidatus Hegumosaceae fam. nov.	UBA828
Candidatus Hemidosaceae fam. nov.	SZUA-38
Candidatus Hemitariaceae fam. nov.	4484-49
Candidatus Hemitiaceae fam. nov.	WLNW01
Candidatus Hemitulaceae fam. nov.	WRBX01
Candidatus Herinanaceae fam. nov.	UBA12079
Candidatus Herinariaceae fam. nov.	SM23-81
Candidatus Herinosaceae fam. nov.	SLHW01
Candidatus Hexagariaceae fam. nov.	2-01-FULL-41-18
Candidatus Hexagellaceae fam. nov.	SBBH01
Candidatus Hexagidaceae fam. nov.	B21-G9
Candidatus Hexagulaceae fam. nov.	JACDBH01
Candidatus Hexapariaceae fam. nov.	UBA1062
Candidatus Hexapidaceae fam. nov.	GWB1-40-14
Candidatus Hexaposaceae fam. nov.	UBA4151
Candidatus Hexapulaceae fam. nov.	RUG350
Candidatus Hibisellaceae fam. nov.	VBWC01
Candidatus Hibisiaceae fam. nov.	SG8-40
Candidatus Hibisosaceae fam. nov.	UBA6663
Candidatus Hirudariaceae fam. nov.	CAIPLT01
Candidatus Hirudidaceae fam. nov.	JABMSB01
Candidatus Hirudulaceae fam. nov.	UBA6099
Candidatus Hirunellaceae fam. nov.	JAAZLZ01
Candidatus Hirunidaceae fam. nov.	SXTU01
Candidatus Hirunulaceae fam. nov.	DUSS01
Candidatus Holisellaceae fam. nov.	UBA5760
Candidatus Holovidaceae fam. nov.	UBA5704
Candidatus Holovosaceae fam. nov.	DTU087
Candidatus Homaganaceae fam. nov.	GCA-2747955
Candidatus Homagidaceae fam. nov.	MAG-NZ
Candidatus Homicosaceae fam. nov.	UBA1063
Candidatus Homiculaceae fam. nov.	UBA6930
Candidatus Homilanaceae fam. nov.	PXDE01
Candidatus Homilidaceae fam. nov.	AC-35
Candidatus Homoganaceae fam. nov.	VENL01
Candidatus Homogariaceae fam. nov.	JAAYXC01
Candidatus Homolanaceae fam. nov.	WRGA01
Candidatus Homolariaceae fam. nov.	CAG-312
Candidatus Homolellaceae fam. nov.	DTU012
Candidatus Homoliaceae fam. nov.	4484-171
Candidatus Homuliaceae fam. nov.	CAINVO01
Candidatus Homulidaceae fam. nov.	QHCA01
Candidatus Homulosaceae fam. nov.	UBA2258
Candidatus Homululaceae fam. nov.	HRBIN36
Candidatus Homunariaceae fam. nov.	B129-G9
Candidatus Homunulaceae fam. nov.	UBA2200
Candidatus Horomanaceae fam. nov.	UBA2777
Candidatus Horomellaceae fam. nov.	MFKM01
Candidatus Horomosaceae fam. nov.	172606-1
Candidatus Humecariaceae fam. nov.	GCA-002772825
Candidatus Humeculaceae fam. nov.	DUMW01
Candidatus Labecellaceae fam. nov.	SG8-24
Candidatus Labeciaceae fam. nov.	SM23-42
Candidatus Lacinanaceae fam. nov.	UBA4882
Candidatus Lacinidaceae fam. nov.	PWPS01
Candidatus Lacinosaceae fam. nov.	GCA-900066905
Candidatus Laculariaceae fam. nov.	16-39-46
Candidatus Laculiaceae fam. nov.	HGM14224
Candidatus Laculosaceae fam. nov.	DG-27
Candidatus Lametariaceae fam. nov.	CAILIB01
Candidatus Lametellaceae fam. nov.	SMYC01
Candidatus Lametosaceae fam. nov.	WRAU01
Candidatus Lanifariaceae fam. nov.	M1805
Candidatus Lanifulaceae fam. nov.	4572-55
Candidatus Laniganaceae fam. nov.	UBA6186
Candidatus Lanigellaceae fam. nov.	JACCYY01
Candidatus Lanigulaceae fam. nov.	UWMA-0217
Candidatus Lanugariaceae fam. nov.	QALW01
Candidatus Lanugellaceae fam. nov.	JAAYUB01
Candidatus Lanugulaceae fam. nov.	FEB-12
[truncated: 40,451 more rows]

## Sheet: new archaeal taxon names
New taxon name	GTDB r202 placeholder alphanumeric
Candidatus Bifararchota phyl. nov.	EX4484-52
Candidatus Funivarchota phyl. nov.	SpSt-1190
Candidatus Genufarchota phyl. nov.	QMZS01
Candidatus Nutamarchota phyl. nov.	PWEA01
Candidatus Bifararchae class. nov.	EX4484-52
Candidatus Bovicarchae class. nov.	EX4484-205
Candidatus Bulaparchae class. nov.	UBA186
Candidatus Cerararchae class. nov.	B47-G6
Candidatus Cerifarchae class. nov.	Bog-38
Candidatus Denixarchae class. nov.	EX4484-6
Candidatus Dicanarchae class. nov.	JABDBI01
Candidatus Funivarchae class. nov.	SpSt-1190
Candidatus Genufarchae class. nov.	QMZS01
Candidatus Nutamarchae class. nov.	PWEA01
Candidatus Rarefarchae class. nov.	DTBI01
Candidatus Rubecarchae class. nov.	QMWL01
Candidatus Semigarchae class. nov.	B88-G9
Candidatus Vitabarchae class. nov.	SW-10-69-26
Candidatus Baditarchales ord. nov.	IMC4
Candidatus Bicaparchales ord. nov.	EX4484-217-1
Candidatus Bifararchales ord. nov.	EX4484-52
Candidatus Biverarchales ord. nov.	CG10238-14
Candidatus Bovicarchales ord. nov.	EX4484-205
Candidatus Bulaparchales ord. nov.	UBA186
Candidatus Capilarchales ord. nov.	JAADDC01
Candidatus Ceracarchales ord. nov.	B31-G17
Candidatus Cerifarchales ord. nov.	Bog-38
Candidatus Cilotarchales ord. nov.	UBA10834
Candidatus Cimitarchales ord. nov.	UBA202
Candidatus Colubarchales ord. nov.	UBA8480
Candidatus Conabarchales ord. nov.	DTKX01
Candidatus Coninarchales ord. nov.	B29-G17
Candidatus Coniparchales ord. nov.	CABMEP01
Candidatus Cuferarchales ord. nov.	CSSed11-243R1
Candidatus Deforarchales ord. nov.	B1Sed10-29
Candidatus Denixarchales ord. nov.	EX4484-6
Candidatus Depelarchales ord. nov.	UBA287
Candidatus Desorarchales ord. nov.	RBG-16-68-12
Candidatus Detorarchales ord. nov.	QMZP01
Candidatus Dicanarchales ord. nov.	JABDBI01
Candidatus Dimidarchales ord. nov.	UBA184
Candidatus Diponarchales ord. nov.	B25
Candidatus Divorarchales ord. nov.	JdFR-21
Candidatus Duponarchales ord. nov.	CABMDC01
Candidatus Favonarchales ord. nov.	DRAE01
Candidatus Filifarchales ord. nov.	UBA583
Candidatus Funivarchales ord. nov.	SpSt-1190
Candidatus Galacarchales ord. nov.	LC-3
Candidatus Genufarchales ord. nov.	QMZS01
Candidatus Hemidarchales ord. nov.	UBA460
Candidatus Hirunarchales ord. nov.	ARK-15
Candidatus Lacinarchales ord. nov.	B9-G16
Candidatus Lametarchales ord. nov.	CR-4
Candidatus Lanifarchales ord. nov.	SCGC-AAA011-G17
Candidatus Lanigarchales ord. nov.	PWKY01
Candidatus Lucularchales ord. nov.	RBG-16-48-13
Candidatus Ludibarchales ord. nov.	DTBS01
Candidatus Manibarchales ord. nov.	B87-G9
Candidatus Murelarchales ord. nov.	UBA9212
Candidatus Nicomarchales ord. nov.	JACIWG01
Candidatus Nimirarchales ord. nov.	40CM-2-53-6
Candidatus Nivomarchales ord. nov.	DTNL01
Candidatus Nutamarchales ord. nov.	PWEA01
Candidatus Panifarchales ord. nov.	PEZQ01
Candidatus Pericarchales ord. nov.	GW2011-AR5
Candidatus Pinifarchales ord. nov.	DTDM01
Candidatus Pinigarchales ord. nov.	UBA10117
Candidatus Pomifarchales ord. nov.	CG07-land
Candidatus Rarefarchales ord. nov.	DTBI01
Candidatus Refularchales ord. nov.	B24
Candidatus Remularchales ord. nov.	B26-1
Candidatus Rubecarchales ord. nov.	QMWL01
Candidatus Sacomarchales ord. nov.	CAILAH01
Candidatus Saxifarchales ord. nov.	LC-2
Candidatus Semigarchales ord. nov.	B88-G9
Candidatus Seniparchales ord. nov.	SG8-5
Candidatus Tabifarchales ord. nov.	EX4484-135
Candidatus Tumefarchales ord. nov.	0-14-0-20-30-16
Candidatus Vepalarchales ord. nov.	JABLTI01
Candidatus Viragarchales ord. nov.	B33-G15
Candidatus Vitabarchales ord. nov.	SW-10-69-26
Candidatus Volubarchales ord. nov.	UBA10214
Candidatus Baditarchaceae fam. nov.	IMC4
Candidatus Baroparchaceae fam. nov.	BMS3B
Candidatus Benifarchaceae fam. nov.	B69-G16
Candidatus Betacarchaceae fam. nov.	SKGA01
Candidatus Bicaparchaceae fam. nov.	EX4484-217-1
Candidatus Bicodarchaceae fam. nov.	JAAXVZ01
Candidatus Bifararchaceae fam. nov.	EX4484-52
Candidatus Bimetarchaceae fam. nov.	J096
Candidatus Bipatarchaceae fam. nov.	UBA489
Candidatus Biverarchaceae fam. nov.	CG10238-14
Candidatus Bonitarchaceae fam. nov.	UBA11716
Candidatus Bovicarchaceae fam. nov.	EX4484-205
Candidatus Bugilarchaceae fam. nov.	DTFW01
Candidatus Bulaparchaceae fam. nov.	UBA186
Candidatus Buxanarchaceae fam. nov.	HR1
Candidatus Cacomarchaceae fam. nov.	B14-G2
Candidatus Cacoparchaceae fam. nov.	SKSH01
Candidatus Cadavarchaceae fam. nov.	BM511
Candidatus Cadurarchaceae fam. nov.	PXDW01
Candidatus Caliparchaceae fam. nov.	UBA10191
Candidatus Capilarchaceae fam. nov.	JAADDC01
Candidatus Caravarchaceae fam. nov.	WYZ-LMO8
Candidatus Carunarchaceae fam. nov.	RDOG01
Candidatus Catagarchaceae fam. nov.	PEVX01
Candidatus Catobarchaceae fam. nov.	SCGC-AAA252-I15
Candidatus Cemenarchaceae fam. nov.	EX4484-224
Candidatus Cenodarchaceae fam. nov.	DTDX01
Candidatus Cepularchaceae fam. nov.	GCA-2687815
Candidatus Cepurarchaceae fam. nov.	PNOQ01
Candidatus Ceracarchaceae fam. nov.	B31-G17
Candidatus Cerevarchaceae fam. nov.	UBA9989
Candidatus Cerifarchaceae fam. nov.	Bog-38
Candidatus Cerimarchaceae fam. nov.	DRYS01
Candidatus Cibicarchaceae fam. nov.	PWGL01
Candidatus Cicatarchaceae fam. nov.	UBA10216
Candidatus Cilicarchaceae fam. nov.	CG08-08-20-14
Candidatus Cilotarchaceae fam. nov.	UBA10834
Candidatus Cimitarchaceae fam. nov.	UBA202
Candidatus Cisalarchaceae fam. nov.	UBA141
Candidatus Citiparchaceae fam. nov.	WOR-SM1-SCG
Candidatus Citivarchaceae fam. nov.	UBA9642
Candidatus Citocarchaceae fam. nov.	PFCU01
Candidatus Cituvarchaceae fam. nov.	SOJC01
Candidatus Cocibarchaceae fam. nov.	UBA12501
Candidatus Cohonarchaceae fam. nov.	GW2011-AR15
Candidatus Colaparchaceae fam. nov.	DRUP01
Candidatus Coleparchaceae fam. nov.	CSSED10-239
Candidatus Colimarchaceae fam. nov.	21-14-0-10-32-9
Candidatus Colubarchaceae fam. nov.	UBA8480
Candidatus Conabarchaceae fam. nov.	DTKX01
Candidatus Conararchaceae fam. nov.	FEN-987
Candidatus Coninarchaceae fam. nov.	B29-G17
Candidatus Coniparchaceae fam. nov.	CABMEP01
Candidatus Corocarchaceae fam. nov.	ARS1285
Candidatus Coticarchaceae fam. nov.	CAITNU01
Candidatus Cucurarchaceae fam. nov.	SCSR01
Candidatus Cuferarchaceae fam. nov.	CSSed11-243R1
Candidatus Culigarchaceae fam. nov.	SpSt-1120
Candidatus Culularchaceae fam. nov.	JAADFI01
Candidatus Dececarchaceae fam. nov.	JAAOZO01
Candidatus Decenarchaceae fam. nov.	UBA73
Candidatus Decomarchaceae fam. nov.	0-14-0-20-34-12
Candidatus Decucarchaceae fam. nov.	J091
Candidatus Decularchaceae fam. nov.	UBA11576
Candidatus Decuparchaceae fam. nov.	GCA-001856825
Candidatus Defacarchaceae fam. nov.	ARS1178
Candidatus Defenarchaceae fam. nov.	JABXJV01
Candidatus Deforarchaceae fam. nov.	B1Sed10-29
Candidatus Defosarchaceae fam. nov.	B24-G1
Candidatus Defularchaceae fam. nov.	UBA543
Candidatus Delacarchaceae fam. nov.	DTGE01
Candidatus Demagarchaceae fam. nov.	B39-G2
Candidatus Democarchaceae fam. nov.	HEL-GB-A
Candidatus Denigarchaceae fam. nov.	PFDC01
Candidatus Denixarchaceae fam. nov.	EX4484-6
Candidatus Denunarchaceae fam. nov.	WUQV01
Candidatus Depecarchaceae fam. nov.	GCA-2687795
Candidatus Depelarchaceae fam. nov.	UBA287
Candidatus Depubarchaceae fam. nov.	B66-G16
Candidatus Desacarchaceae fam. nov.	SM23-78
Candidatus Deseparchaceae fam. nov.	GW2011-AR1
Candidatus Desorarchaceae fam. nov.	RBG-16-68-12
Candidatus Deteparchaceae fam. nov.	LCB-4
Candidatus Detorarchaceae fam. nov.	QMZP01
Candidatus Detumarchaceae fam. nov.	JACAEJ01
Candidatus Devecarchaceae fam. nov.	JAADFM01
Candidatus Dicanarchaceae fam. nov.	JABDBI01
Candidatus Dilacarchaceae fam. nov.	GCA-002838935
Candidatus Dilemarchaceae fam. nov.	UBA213
Candidatus Dilibarchaceae fam. nov.	UBA284
Candidatus Dimidarchaceae fam. nov.	UBA184
Candidatus Diponarchaceae fam. nov.	B25
Candidatus Diritarchaceae fam. nov.	DSCA01
Candidatus Disidarchaceae fam. nov.	EX4572-44
Candidatus Divorarchaceae fam. nov.	JdFR-21
Candidatus Domicarchaceae fam. nov.	B15-G2
Candidatus Domiparchaceae fam. nov.	B50-G16
Candidatus Duponarchaceae fam. nov.	CABMDC01
Candidatus Duricarchaceae fam. nov.	DSZF01
Candidatus Fatifarchaceae fam. nov.	JAAOZN01
Candidatus Favonarchaceae fam. nov.	DRAE01
Candidatus Fecularchaceae fam. nov.	CG1-02-33-12
Candidatus Fecunarchaceae fam. nov.	DTGL01
Candidatus Fefelarchaceae fam. nov.	SZUA-236
Candidatus Fibicarchaceae fam. nov.	UBA525
Candidatus Ficedarchaceae fam. nov.	JAAEEP01
Candidatus Ficularchaceae fam. nov.	JAAZKV01
Candidatus Figilarchaceae fam. nov.	UBA8471
Candidatus Filifarchaceae fam. nov.	UBA583
Candidatus Foricarchaceae fam. nov.	UBA119
Candidatus Forinarchaceae fam. nov.	GCA-2688965
Candidatus Fumifarchaceae fam. nov.	B24-2
Candidatus Funivarchaceae fam. nov.	SpSt-1190
Candidatus Furibarchaceae fam. nov.	QMZZ01
Candidatus Galacarchaceae fam. nov.	LC-3
Candidatus Genufarchaceae fam. nov.	QMZS01
Candidatus Hemidarchaceae fam. nov.	UBA460
Candidatus Hemitarchaceae fam. nov.	BA1
Candidatus Hexamarchaceae fam. nov.	GCA-2688035
Candidatus Hirudarchaceae fam. nov.	SOKP01
Candidatus Hirunarchaceae fam. nov.	ARK-15
Candidatus Holisarchaceae fam. nov.	B20-G17
Candidatus Lacinarchaceae fam. nov.	B9-G16
Candidatus Lametarchaceae fam. nov.	CR-4
Candidatus Lanifarchaceae fam. nov.	SCGC-AAA011-G17
Candidatus Lanigarchaceae fam. nov.	PWKY01
Candidatus Latibarchaceae fam. nov.	UBA97
Candidatus Laxitarchaceae fam. nov.	DRVD01
Candidatus Letifarchaceae fam. nov.	SKNY01
Candidatus Licenarchaceae fam. nov.	B29-G15
Candidatus Locelarchaceae fam. nov.	MFWN01
Candidatus Lucelarchaceae fam. nov.	B40-G2
Candidatus Lucubarchaceae fam. nov.	B8-G13
Candidatus Lucularchaceae fam. nov.	RBG-16-48-13
Candidatus Ludibarchaceae fam. nov.	DTBS01
Candidatus Ludimarchaceae fam. nov.	HEL-GB-B
Candidatus Lugubarchaceae fam. nov.	QMVU01
Candidatus Mahelarchaceae fam. nov.	DSZJ01
Candidatus Malagarchaceae fam. nov.	UBA164
Candidatus Manibarchaceae fam. nov.	B87-G9
Candidatus Masocarchaceae fam. nov.	JAAOZP01
Candidatus Mavorarchaceae fam. nov.	NM3
Candidatus Melilarchaceae fam. nov.	JACIVX01
Candidatus Metabarchaceae fam. nov.	DTNV01
Candidatus Mimogarchaceae fam. nov.	ARS1403
Candidatus Modifarchaceae fam. nov.	B10-G16
Candidatus Molecarchaceae fam. nov.	SW-7-71-33
Candidatus Momorarchaceae fam. nov.	DTIR01
Candidatus Monoparchaceae fam. nov.	B18-G2
Candidatus Morigarchaceae fam. nov.	PXRE01
Candidatus Murelarchaceae fam. nov.	UBA9212
Candidatus Navicarchaceae fam. nov.	ARS1160
Candidatus Necubarchaceae fam. nov.	LFW-46
Candidatus Negotarchaceae fam. nov.	0-14-0-80-44-23
Candidatus Nicomarchaceae fam. nov.	JACIWG01
Candidatus Nimirarchaceae fam. nov.	40CM-2-53-6
Candidatus Nitelarchaceae fam. nov.	QMZT01
Candidatus Nivomarchaceae fam. nov.	DTNL01
Candidatus Notabarchaceae fam. nov.	GCA-2688095
Candidatus Notacarchaceae fam. nov.	CAINOH01
Candidatus Nubecarchaceae fam. nov.	GCA-2687185
Candidatus Nugacarchaceae fam. nov.	UBA233
Candidatus Nugivarchaceae fam. nov.	QMZM01
Candidatus Nutamarchaceae fam. nov.	PWEA01
Candidatus Pacifarchaceae fam. nov.	B48-G16
Candidatus Panifarchaceae fam. nov.	PEZQ01
Candidatus Panoparchaceae fam. nov.	UBA57
Candidatus Papilarchaceae fam. nov.	JAADEF01
Candidatus Paralarchaceae fam. nov.	UBA10107
Candidatus Peracarchaceae fam. nov.	WYZ-LMO6
Candidatus Peradarchaceae fam. nov.	DTKF01
Candidatus Pericarchaceae fam. nov.	GW2011-AR5
Candidatus Peroparchaceae fam. nov.	CG1-02-57-44
Candidatus Pimenarchaceae fam. nov.	JdFR-43
Candidatus Pinifarchaceae fam. nov.	DTDM01
Candidatus Pinigarchaceae fam. nov.	UBA10117
Candidatus Pocilarchaceae fam. nov.	B9-G17
Candidatus Pomifarchaceae fam. nov.	CG07-land
Candidatus Pulegarchaceae fam. nov.	UBA12030
Candidatus Purularchaceae fam. nov.	AG1
Candidatus Ranunarchaceae fam. nov.	1-14-0-10-31-34
Candidatus Rarefarchaceae fam. nov.	DTBI01
Candidatus Ratifarchaceae fam. nov.	GW2011-AR17
Candidatus Recorarchaceae fam. nov.	DTCF01
Candidatus Refinarchaceae fam. nov.	B3-JM-08
Candidatus Refocarchaceae fam. nov.	EX4484-31
Candidatus Reforarchaceae fam. nov.	B54-G15
Candidatus Refularchaceae fam. nov.	B24
Candidatus Regifarchaceae fam. nov.	DSVV01
Candidatus Relaparchaceae fam. nov.	CG1-02-47-40
Candidatus Relecarchaceae fam. nov.	ARS21
Candidatus Relenarchaceae fam. nov.	UBA10210
Candidatus Remularchaceae fam. nov.	B26-1
Candidatus Resalarchaceae fam. nov.	CADDZS01
Candidatus Rosararchaceae fam. nov.	GCA-2685855
Candidatus Rubecarchaceae fam. nov.	QMWL01
Candidatus Rubigarchaceae fam. nov.	B72-G16
Candidatus Rurigarchaceae fam. nov.	RBG-13-38-9
Candidatus Saburarchaceae fam. nov.	J110
Candidatus Sacomarchaceae fam. nov.	CAILAH01
Candidatus Salubarchaceae fam. nov.	JdFR-45
Candidatus Satacarchaceae fam. nov.	UBA472
Candidatus Saxifarchaceae fam. nov.	LC-2
Candidatus Saxoparchaceae fam. nov.	DTJL01
Candidatus Semigarchaceae fam. nov.	B88-G9
Candidatus Semiparchaceae fam. nov.	B47-G15
Candidatus Semunarchaceae fam. nov.	JDFR-13
Candidatus Seniparchaceae fam. nov.	SG8-5
Candidatus Sicararchaceae fam. nov.	CG1-02-47-18
Candidatus Sifunarchaceae fam. nov.	QS-1-68-20
Candidatus Siligarchaceae fam. nov.	UBA10161
Candidatus Siminarchaceae fam. nov.	GW2011-AR10
Candidatus Soliparchaceae fam. nov.	CG1-02-31-27
Candidatus Solivarchaceae fam. nov.	SKIA01
Candidatus Subofarchaceae fam. nov.	SBBD01
Candidatus Subucarchaceae fam. nov.	UBA148
Candidatus Sugilarchaceae fam. nov.	EX4484-36
Candidatus Tabifarchaceae fam. nov.	EX4484-135
Candidatus Tabitarchaceae fam. nov.	GW2011-AR20
Candidatus Taraxarchaceae fam. nov.	B15-G16
Candidatus Telegarchaceae fam. nov.	CABMDW01
Candidatus Tenebarchaceae fam. nov.	UBA183
Candidatus Tenilarchaceae fam. nov.	UBA93
Candidatus Tetenarchaceae fam. nov.	PZKD01
Candidatus Timefarchaceae fam. nov.	CAIVOO01
Candidatus Tirocarchaceae fam. nov.	GW2011-AR9
Candidatus Tolutarchaceae fam. nov.	DTMW01
Candidatus Tomogarchaceae fam. nov.	JAADFO01
Candidatus Tubicarchaceae fam. nov.	UBA10200
Candidatus Tumefarchaceae fam. nov.	0-14-0-20-30-16
Candidatus Vagabarchaceae fam. nov.	UBA168
Candidatus Vehicarchaceae fam. nov.	UBA12382
Candidatus Velifarchaceae fam. nov.	GW2011-AR18
Candidatus Venabarchaceae fam. nov.	GLR71
Candidatus Venefarchaceae fam. nov.	EX4484-15
Candidatus Venunarchaceae fam. nov.	J072
Candidatus Vepalarchaceae fam. nov.	JABLTI01
Candidatus Viginarchaceae fam. nov.	AMARA-1
Candidatus Vinacarchaceae fam. nov.	B79-G9
Candidatus Viragarchaceae fam. nov.	B33-G15
Candidatus Viriparchaceae fam. nov.	JABMPP01
Candidatus Vitabarchaceae fam. nov.	SW-10-69-26
Candidatus Vitifarchaceae fam. nov.	JdFR-42
Candidatus Vitigarchaceae fam. nov.	GCA-2686295
Candidatus Vocamarchaceae fam. nov.	SP79
Candidatus Vocifarchaceae fam. nov.	SOIM01
Candidatus Volubarchaceae fam. nov.	UBA10214
Candidatus Volucarchaceae fam. nov.	CG-Epi1
Candidatus Volunarchaceae fam. nov.	DTQO01
Candidatus Voragarchaceae fam. nov.	UBA10219
Candidatus Xenoparchaceae fam. nov.	DTGH01
Candidatus Baditarcha gen. nov.	IMC4
Candidatus Baroparcha gen. nov.	BMS3B
Candidatus Benemarcha gen. nov.	JACCLJ01
Candidatus Beneparcha gen. nov.	PIYB01
Candidatus Benevarcha gen. nov.	XQ-INN-246
Candidatus Benifarcha gen. nov.	B69-G16
Candidatus Benivarcha gen. nov.	LKUD01
Candidatus Betacarcha gen. nov.	SKGA01
Candidatus Bicalarcha gen. nov.	JdFR-07
Candidatus Bicaparcha gen. nov.	EX4484-217-1
Candidatus Bicinarcha gen. nov.	B12-G17
Candidatus Biciparcha gen. nov.	GCA-2688925
Candidatus Bicodarcha gen. nov.	JAAXVZ01
Candidatus Bicorarcha gen. nov.	CAIKBN01
Candidatus Bicubarcha gen. nov.	JABWCK01
Candidatus Bifararcha gen. nov.	EX4484-52
Candidatus Bifisarcha gen. nov.	CABMCB01
Candidatus Bigemarcha gen. nov.	SKXI01
Candidatus Bimetarcha gen. nov.	J096
Candidatus Bimotarcha gen. nov.	DTMT01
Candidatus Binocarcha gen. nov.	B78-G9
Candidatus Bipararcha gen. nov.	JDFR-14
Candidatus Bipatarcha gen. nov.	UBA489
Candidatus Bipenarcha gen. nov.	CABMEV01
Candidatus Bipinarcha gen. nov.	TEKIR-8
Candidatus Bisacarcha gen. nov.	BA-13
Candidatus Bisularcha gen. nov.	RumEn-M2
Candidatus Biverarcha gen. nov.	CG10238-14
Candidatus Bonifarcha gen. nov.	QS-4-69-31
Candidatus Bonitarcha gen. nov.	UBA11716
Candidatus Bovicarcha gen. nov.	EX4484-205
Candidatus Bucelarcha gen. nov.	PCYB01
Candidatus Bugilarcha gen. nov.	DTFW01
Candidatus Bulaparcha gen. nov.	UBA186
Candidatus Butubarcha gen. nov.	JAADDH01
Candidatus Buxanarcha gen. nov.	HR1
Candidatus Buxifarcha gen. nov.	QEXZ01
Candidatus Cacalarcha gen. nov.	SpSt-9
Candidatus Cacomarcha gen. nov.	B14-G2
Candidatus Cacoparcha gen. nov.	SKSH01
Candidatus Cadavarcha gen. nov.	BM511
Candidatus Cadurarcha gen. nov.	PXDW01
Candidatus Caliparcha gen. nov.	UBA10191
Candidatus Camilarcha gen. nov.	CAIMOB01
Candidatus Capabarcha gen. nov.	CBA1134
Candidatus Capilarcha gen. nov.	JAADDC01
Candidatus Capucarcha gen. nov.	SpSt-742
Candidatus Capudarcha gen. nov.	DSAL01
Candidatus Caravarcha gen. nov.	WYZ-LMO8
Candidatus Carecarcha gen. nov.	Tc-Br11-E2g1
Candidatus Carucarcha gen. nov.	JABMQF01
Candidatus Carunarcha gen. nov.	RDOG01
Candidatus Casabarcha gen. nov.	GCA-2686855
Candidatus Caselarcha gen. nov.	DRZP01
Candidatus Casigarcha gen. nov.	EX4484-58
Candidatus Catabarcha gen. nov.	UBA8516
Candidatus Catafarcha gen. nov.	CAIRCU01
Candidatus Catagarcha gen. nov.	PEVX01
Candidatus Cataparcha gen. nov.	CS1-C013
Candidatus Catecarcha gen. nov.	UBA11855
Candidatus Categarcha gen. nov.	MP8T-1
Candidatus Catilarcha gen. nov.	JGI-0000106-J15
Candidatus Catobarcha gen. nov.	SCGC-AAA252-I15
Candidatus Catocarcha gen. nov.	DSZD01
Candidatus Celamarcha gen. nov.	PIYF01
Candidatus Celumarcha gen. nov.	MGIIa-L3
Candidatus Cemenarcha gen. nov.	EX4484-224
Candidatus Cenacarcha gen. nov.	QS-5-70-15
Candidatus Cenobarcha gen. nov.	JdFR-37
Candidatus Cenodarcha gen. nov.	DTDX01
Candidatus Cenotarcha gen. nov.	JACEMX01
Candidatus Cepularcha gen. nov.	GCA-2687815
Candidatus Cepurarcha gen. nov.	PNOQ01
Candidatus Ceracarcha gen. nov.	B31-G17
Candidatus Cerararcha gen. nov.	B47-G6
Candidatus Cerebarcha gen. nov.	TA-21
Candidatus Cerevarcha gen. nov.	UBA9989
Candidatus Cerifarcha gen. nov.	Bog-38
Candidatus Cerimarcha gen. nov.	DRYS01
Candidatus Cerofarcha gen. nov.	UBA10536
Candidatus Ceromarcha gen. nov.	CAILMU01
Candidatus Cerucarcha gen. nov.	DSLH01
Candidatus Cetararcha gen. nov.	WJOV01
Candidatus Cibararcha gen. nov.	PIYA01
Candidatus Cibicarcha gen. nov.	PWGL01
Candidatus Cicararcha gen. nov.	JACAEL01
Candidatus Cicatarcha gen. nov.	UBA10216
Candidatus Cicilarcha gen. nov.	RBG-16-49-10
Candidatus Cilibarcha gen. nov.	AWOC01
Candidatus Cilicarcha gen. nov.	CG08-08-20-14
Candidatus Cilotarcha gen. nov.	UBA10834
Candidatus Cimelarcha gen. nov.	CSSED10-269
Candidatus Ciminarcha gen. nov.	DG-33
Candidatus Cimitarcha gen. nov.	UBA202
Candidatus Cinefarcha gen. nov.	DTGI01
Candidatus Ciniparcha gen. nov.	UBA207
Candidatus Cisalarcha gen. nov.	UBA141
Candidatus Citiparcha gen. nov.	WOR-SM1-SCG
Candidatus Citivarcha gen. nov.	UBA9642
Candidatus Citocarcha gen. nov.	PFCU01
Candidatus Cituvarcha gen. nov.	SOJC01
Candidatus Cobalarcha gen. nov.	ARS1301
Candidatus Cocibarcha gen. nov.	UBA12501
Candidatus Cocolarcha gen. nov.	B75-G9
Candidatus Codifarcha gen. nov.	CADBMS01
Candidatus Cohonarcha gen. nov.	GW2011-AR15
Candidatus Cohorarcha gen. nov.	UBA102
Candidatus Cohurarcha gen. nov.	CAIYHQ01
Candidatus Colaparcha gen. nov.	DRUP01
Candidatus Coleparcha gen. nov.	CSSED10-239
Candidatus Colimarcha gen. nov.	21-14-0-10-32-9
Candidatus Coliparcha gen. nov.	DTHR01
Candidatus Coloparcha gen. nov.	JdFR-41
Candidatus Colubarcha gen. nov.	UBA8480
Candidatus Conabarcha gen. nov.	DTKX01
Candidatus Conamarcha gen. nov.	UBA8941
Candidatus Conararcha gen. nov.	FEN-987
Candidatus Conibarcha gen. nov.	DRYM01
Candidatus Conigarcha gen. nov.	DTEX01
Candidatus Coninarcha gen. nov.	B29-G17
Candidatus Coniparcha gen. nov.	CABMEP01
Candidatus Conoparcha gen. nov.	MGIIb-N2
Candidatus Conubarcha gen. nov.	DSQK01
Candidatus Corocarcha gen. nov.	ARS1285
Candidatus Cosidarcha gen. nov.	J152
Candidatus Cotenarcha gen. nov.	RBG-13-33-26
Candidatus Coticarcha gen. nov.	CAITNU01
Candidatus Coturarcha gen. nov.	QS-4-70-19
Candidatus Cucurarcha gen. nov.	SCSR01
Candidatus Cuferarcha gen. nov.	CSSed11-243R1
Candidatus Culigarcha gen. nov.	SpSt-1120
Candidatus Culularcha gen. nov.	JAADFI01
Candidatus Cunabarcha gen. nov.	1-14-0-10-34-76
Candidatus Curabarcha gen. nov.	CAIKOA01
Candidatus Curacarcha gen. nov.	MGIIa-L1
Candidatus Curotarcha gen. nov.	0-14-0-20-59-11
Candidatus Cuticarcha gen. nov.	QS-5-68-33
Candidatus Debucarcha gen. nov.	CSBR16-154
Candidatus Decacarcha gen. nov.	DRGT01
Candidatus Decamarcha gen. nov.	JdFR-19
Candidatus Decaparcha gen. nov.	DTOY01
Candidatus Decatarcha gen. nov.	GW2011-AR13
Candidatus Dececarcha gen. nov.	JAAOZO01
Candidatus Decenarcha gen. nov.	UBA73
Candidatus Decinarcha gen. nov.	B23
Candidatus Decitarcha gen. nov.	MVQI01
Candidatus Decomarcha gen. nov.	0-14-0-20-34-12
Candidatus Decucarcha gen. nov.	J091
Candidatus Decularcha gen. nov.	UBA11576
Candidatus Decunarcha gen. nov.	B3-WOES
Candidatus Decuparcha gen. nov.	GCA-001856825
Candidatus Dedigarcha gen. nov.	VBQI01
Candidatus Defacarcha gen. nov.	ARS1178
Candidatus Defalarcha gen. nov.	PFCY01
Candidatus Defanarcha gen. nov.	ARS1309
Candidatus Defararcha gen. nov.	JAAXQB01
Candidatus Defenarcha gen. nov.	JABXJV01
Candidatus Defesarcha gen. nov.	UBA71
Candidatus Defetarcha gen. nov.	DTCV01
Candidatus Deforarcha gen. nov.	B1Sed10-29
Candidatus Defosarcha gen. nov.	B24-G1
Candidatus Defularcha gen. nov.	UBA543
Candidatus Defunarcha gen. nov.	QMZJ01
Candidatus Dehinarcha gen. nov.	GCA-2688265
Candidatus Dehisarcha gen. nov.	UBA328
Candidatus Delacarcha gen. nov.	DTGE01
Candidatus Delaparcha gen. nov.	CAIQQL01
Candidatus Delebarcha gen. nov.	J104
Candidatus Delecarcha gen. nov.	PWVO01
Candidatus Delubarcha gen. nov.	PSPT01
Candidatus Delucarcha gen. nov.	B1SED10-34
Candidatus Demadarcha gen. nov.	NZ13-MG1
Candidatus Demagarcha gen. nov.	B39-G2
Candidatus Democarcha gen. nov.	HEL-GB-A
Candidatus Demogarcha gen. nov.	B12-G16
Candidatus Denavarcha gen. nov.	GCA-2688355
Candidatus Denicarcha gen. nov.	SD8
Candidatus Denigarcha gen. nov.	PFDC01
Candidatus Denixarcha gen. nov.	EX4484-6
Candidatus Denomarcha gen. nov.	WYEQ01
Candidatus Denorarcha gen. nov.	B91-G9
Candidatus Denunarcha gen. nov.	WUQV01
Candidatus Depacarcha gen. nov.	CABMGE01
Candidatus Depasarcha gen. nov.	DRZQ01
Candidatus Depecarcha gen. nov.	GCA-2687795
Candidatus Depelarcha gen. nov.	UBA287
Candidatus Depicarcha gen. nov.	PWVY01
Candidatus Depocarcha gen. nov.	ASMP01
Candidatus Depoparcha gen. nov.	SW-9-67-25
Candidatus Depubarcha gen. nov.	B66-G16
Candidatus Depuparcha gen. nov.	UBA9640
Candidatus Derecarcha gen. nov.	TA-20
Candidatus Derelarcha gen. nov.	DTU008
Candidatus Derunarcha gen. nov.	JAADCV01
Candidatus Desacarcha gen. nov.	SM23-78
Candidatus Deseparcha gen. nov.	GW2011-AR1
Candidatus Desomarcha gen. nov.	WRER01
Candidatus Desonarcha gen. nov.	UBA493
Candidatus Desorarcha gen. nov.	RBG-16-68-12
Candidatus Desucarcha gen. nov.	CAISET01
Candidatus Desuparcha gen. nov.	SW-4-43-9
Candidatus Desurarcha gen. nov.	DRYY01
Candidatus Detecarcha gen. nov.	UBA206
Candidatus Detenarcha gen. nov.	J101
Candidatus Deteparcha gen. nov.	LCB-4
Candidatus Detesarcha gen. nov.	B1-Br10-U2g19
Candidatus Detorarcha gen. nov.	QMZP01
Candidatus Detosarcha gen. nov.	ISO4-G1
Candidatus Detotarcha gen. nov.	GCA-2726865
Candidatus Detumarcha gen. nov.	JACAEJ01
Candidatus Devecarcha gen. nov.	JAADFM01
Candidatus Dibaparcha gen. nov.	CABMGO01
Candidatus Dibucarcha gen. nov.	SKVC01
Candidatus Dicanarcha gen. nov.	JABDBI01
Candidatus Dicibarcha gen. nov.	JACAEI01
Candidatus Dicimarcha gen. nov.	UBA10204
Candidatus Didacarcha gen. nov.	DRZC01
Candidatus Dilacarcha gen. nov.	GCA-002838935
Candidatus Dilemarcha gen. nov.	UBA213
Candidatus Dilibarcha gen. nov.	UBA284
Candidatus Dilicarcha gen. nov.	MVRE01
Candidatus Dilogarcha gen. nov.	MGIIb-Q1
Candidatus Diludarcha gen. nov.	B67-G16
Candidatus Diluvarcha gen. nov.	EX4484-121
Candidatus Dimacarcha gen. nov.	CS3-C152
Candidatus Dimadarcha gen. nov.	SpSt-28
Candidatus Dimidarcha gen. nov.	UBA184
Candidatus Diminarcha gen. nov.	UBA9915
Candidatus Dinuparcha gen. nov.	B5-G16
Candidatus Diponarcha gen. nov.	B25
Candidatus Direcarcha gen. nov.	UBA12276
Candidatus Direparcha gen. nov.	WTHC01
Candidatus Diritarcha gen. nov.	DSCA01
Candidatus Disidarcha gen. nov.	EX4572-44
Candidatus Divolarcha gen. nov.	PWWA01
Candidatus Divorarcha gen. nov.	JdFR-21
Candidatus Divularcha gen. nov.	J144
Candidatus Documarcha gen. nov.	ARS23
Candidatus Domabarcha gen. nov.	OWC5
Candidatus Domicarcha gen. nov.	B15-G2
Candidatus Domigarcha gen. nov.	B44-G15
Candidatus Domiparcha gen. nov.	B50-G16
Candidatus Doxolarcha gen. nov.	VadinCA11
Candidatus Ducilarcha gen. nov.	CAIOIN01
Candidatus Duponarcha gen. nov.	CABMDC01
Candidatus Dupunarcha gen. nov.	HRBIN02
Candidatus Duricarcha gen. nov.	DSZF01
Candidatus Facunarcha gen. nov.	TH5896
Candidatus Famelarcha gen. nov.	DSAX01
Candidatus Faticarcha gen. nov.	B46-G15
Candidatus Fatifarcha gen. nov.	JAAOZN01
Candidatus Fatilarcha gen. nov.	PUNK01
Candidatus Favilarcha gen. nov.	SOJA01
Candidatus Favonarcha gen. nov.	DRAE01
Candidatus Fecularcha gen. nov.	CG1-02-33-12
Candidatus Fecunarcha gen. nov.	DTGL01
Candidatus Fefelarcha gen. nov.	SZUA-236
Candidatus Feficarcha gen. nov.	SICU01
Candidatus Femelarcha gen. nov.	DTIH01
Candidatus Fetifarcha gen. nov.	MGIIb-O2
Candidatus Fetutarcha gen. nov.	JABABT01
Candidatus Fibicarcha gen. nov.	UBA525
Candidatus Ficedarcha gen. nov.	JAAEEP01
Candidatus Ficularcha gen. nov.	JAAZKV01
Candidatus Fidenarcha gen. nov.	TH1177
Candidatus Fiducarcha gen. nov.	SMTZ1-83
Candidatus Figilarcha gen. nov.	UBA8471
Candidatus Filifarcha gen. nov.	UBA583
Candidatus Forabarcha gen. nov.	ANME1a
Candidatus Foricarcha gen. nov.	UBA119
Candidatus Forinarcha gen. nov.	GCA-2688965
Candidatus Fuligarcha gen. nov.	DSLF01
Candidatus Fumacarcha gen. nov.	DSFO01
Candidatus Fumifarcha gen. nov.	B24-2
Candidatus Funamarcha gen. nov.	SKIS01
Candidatus Funebarcha gen. nov.	DRIF01
Candidatus Funivarcha gen. nov.	SpSt-1190
Candidatus Furibarcha gen. nov.	QMZZ01
Candidatus Fusifarcha gen. nov.	CAIPHS01
Candidatus Futatarcha gen. nov.	JAAEEW01
Candidatus Galacarcha gen. nov.	LC-3
Candidatus Gasifarcha gen. nov.	BIN-L-1
Candidatus Gasomarcha gen. nov.	UBA349
Candidatus Genufarcha gen. nov.	QMZS01
Candidatus Gerunarcha gen. nov.	B14-G17
Candidatus Giganarcha gen. nov.	MGIIb-O1
Candidatus Habacarcha gen. nov.	JACAFH01
Candidatus Halucarcha gen. nov.	QS-1-68-17
Candidatus Haricarcha gen. nov.	SpSt-971
Candidatus Hecatarcha gen. nov.	UBA10452
Candidatus Hegumarcha gen. nov.	DTBJ01
Candidatus Hemidarcha gen. nov.	UBA460
Candidatus Hemitarcha gen. nov.	BA1
Candidatus Herinarcha gen. nov.	WYZ-LMO2
Candidatus Hexagarcha gen. nov.	SURF-65
Candidatus Hexamarcha gen. nov.	GCA-2688035
Candidatus Hexaparcha gen. nov.	CAIVED01
Candidatus Hibisarcha gen. nov.	1-14-0-10-37-12
Candidatus Hirudarcha gen. nov.	SOKP01
Candidatus Hirunarcha gen. nov.	ARK-15
Candidatus Holisarcha gen. nov.	B20-G17
Candidatus Holovarcha gen. nov.	UBA587
Candidatus Homagarcha gen. nov.	ARK-14
Candidatus Homicarcha gen. nov.	QENH01
Candidatus Homilarcha gen. nov.	B63
Candidatus Homogarcha gen. nov.	PXYB01
Candidatus Homolarcha gen. nov.	GW2011-AR11
Candidatus Homularcha gen. nov.	B17-G15
Candidatus Homunarcha gen. nov.	JAAZWY01
Candidatus Horomarcha gen. nov.	QMZG01
Candidatus Humecarcha gen. nov.	EX4484-204
Candidatus Labecarcha gen. nov.	Tc-Br11
Candidatus Lacinarcha gen. nov.	B9-G16
Candidatus Lacularcha gen. nov.	GLR112
Candidatus Lametarcha gen. nov.	CR-4
Candidatus Lanifarcha gen. nov.	SCGC-AAA011-G17
Candidatus Lanigarcha gen. nov.	PWKY01
Candidatus Lanugarcha gen. nov.	PL-Br10-E2g29
Candidatus Lapicarcha gen. nov.	HRBIN01
Candidatus Lapilarcha gen. nov.	JAADGB01
Candidatus Latibarcha gen. nov.	UBA97
Candidatus Lavabarcha gen. nov.	SDNM01
Candidatus Lavacarcha gen. nov.	PWHR01
Candidatus Laxitarcha gen. nov.	DRVD01
Candidatus Legifarcha gen. nov.	WOR-SM1-SCG-A
Candidatus Lenimarcha gen. nov.	UBA9653
Candidatus Lenocarcha gen. nov.	UBA581
Candidatus Lenunarcha gen. nov.	CAISDH01
Candidatus Letifarcha gen. nov.	SKNY01
Candidatus Levidarcha gen. nov.	CAIXOA01
Candidatus Levifarcha gen. nov.	VBQP01
Candidatus Licenarcha gen. nov.	B29-G15
Candidatus Locelarcha gen. nov.	MFWN01
Candidatus Lorararcha gen. nov.	CAIKOD01
Candidatus Lubenarcha gen. nov.	EX4484-71
Candidatus Lucelarcha gen. nov.	B40-G2
Candidatus Lucerarcha gen. nov.	PIYN01
Candidatus Lucifarcha gen. nov.	MGIIb-N1
Candidatus Lucubarcha gen. nov.	B8-G13
Candidatus Lucularcha gen. nov.	RBG-16-48-13
Candidatus Ludibarcha gen. nov.	DTBS01
Candidatus Ludifarcha gen. nov.	JACIWB01
Candidatus Ludimarcha gen. nov.	HEL-GB-B
Candidatus Lugubarcha gen. nov.	QMVU01
Candidatus Lupanarcha gen. nov.	B3-G16
Candidatus Luticarcha gen. nov.	QMZY01
Candidatus Lutularcha gen. nov.	CADDZR01
Candidatus Luxurarcha gen. nov.	WUQU01
Candidatus Macilarcha gen. nov.	CAIXRF01
Candidatus Mahelarcha gen. nov.	DSZJ01
Candidatus Mahemarcha gen. nov.	CABMCJ01
Candidatus Malagarcha gen. nov.	UBA164
Candidatus Maledarcha gen. nov.	B-DKE
Candidatus Malifarcha gen. nov.	N1521
Candidatus Maligarcha gen. nov.	DTQF01
Candidatus Malivarcha gen. nov.	MGIIa-K2
Candidatus Manibarcha gen. nov.	B87-G9
Candidatus Manomarcha gen. nov.	DRVV01
Candidatus Manubarcha gen. nov.	JAADEY01
Candidatus Manufarcha gen. nov.	DRUK01
Candidatus Manuparcha gen. nov.	CAIKMX01
Candidatus Masocarcha gen. nov.	JAAOZP01
Candidatus Mavorarcha gen. nov.	NM3
Candidatus Maxilarcha gen. nov.	UBA431
Candidatus Maxumarcha gen. nov.	TEKIR-14
Candidatus Medimarcha gen. nov.	JAADCY01
Candidatus Megalarcha gen. nov.	B109-G9
Candidatus Melilarcha gen. nov.	JACIVX01
Candidatus Meloparcha gen. nov.	QBUR01
Candidatus Menaparcha gen. nov.	1-14-0-10-44-13
Candidatus Meridarcha gen. nov.	JAAYNL01
Candidatus Metabarcha gen. nov.	DTNV01
Candidatus Metaparcha gen. nov.	HARCEL1
Candidatus Metucarcha gen. nov.	SG9
Candidatus Mimogarcha gen. nov.	ARS1403
Candidatus Minagarcha gen. nov.	BMS3ABIN17
Candidatus Minurarcha gen. nov.	UBA10205
Candidatus Mirabarcha gen. nov.	FEN-33
Candidatus Miracarcha gen. nov.	GCA-000496135
Candidatus Mirifarcha gen. nov.	WRKA01
Candidatus Modifarcha gen. nov.	B10-G16
Candidatus Molecarcha gen. nov.	SW-7-71-33
Candidatus Momorarcha gen. nov.	DTIR01
Candidatus Monacarcha gen. nov.	20-14-0-80-47-9
Candidatus Monimarcha gen. nov.	M3-22
Candidatus Monodarcha gen. nov.	Acd1
Candidatus Monoparcha gen. nov.	B18-G2
Candidatus Monumarcha gen. nov.	UBA114
Candidatus Morigarcha gen. nov.	PXRE01
Candidatus Munifarcha gen. nov.	G60ANME1
Candidatus Murelarcha gen. nov.	UBA9212
Candidatus Murilarcha gen. nov.	GCA-2687275
Candidatus Musularcha gen. nov.	MGIIa-K1
Candidatus Mutabarcha gen. nov.	CAIXYX01
Candidatus Navicarcha gen. nov.	ARS1160
Candidatus Navifarcha gen. nov.	COMBO-56-21
Candidatus Necoparcha gen. nov.	MTP4
Candidatus Necubarcha gen. nov.	LFW-46
Candidatus Nefanarcha gen. nov.	JdFR-11
Candidatus Negidarcha gen. nov.	CAIYYQ01
Candidatus Negotarcha gen. nov.	0-14-0-80-44-23
Candidatus Nehalarcha gen. nov.	CG1-02-35-32
Candidatus Nicomarcha gen. nov.	JACIWG01
Candidatus Nicotarcha gen. nov.	UBA95
Candidatus Nidifarcha gen. nov.	NZBF01
Candidatus Nimirarcha gen. nov.	40CM-2-53-6
Candidatus Nitelarcha gen. nov.	QMZT01
Candidatus Nivomarcha gen. nov.	DTNL01
Candidatus Nocenarcha gen. nov.	CABZYC01
Candidatus Nocumarcha gen. nov.	PALSA-986
Candidatus Nosocarcha gen. nov.	MX-02
Candidatus Notabarcha gen. nov.	GCA-2688095
Candidatus Notacarcha gen. nov.	CAINOH01
Candidatus Novilarcha gen. nov.	UBA412
Candidatus Nubecarcha gen. nov.	GCA-2687185
Candidatus Nubifarcha gen. nov.	A07HB70
Candidatus Nubigarcha gen. nov.	SMTZ1-45
Candidatus Nucifarcha gen. nov.	UBA288
Candidatus Nugacarcha gen. nov.	UBA233
Candidatus Nugivarcha gen. nov.	QMZM01
Candidatus Nutabarcha gen. nov.	J07HR59
Candidatus Nutamarcha gen. nov.	PWEA01
Candidatus Pabilarcha gen. nov.	UBA117
Candidatus Pacifarcha gen. nov.	B48-G16
Candidatus Palifarcha gen. nov.	SICV01
Candidatus Panifarcha gen. nov.	PEZQ01
Candidatus Panoparcha gen. nov.	UBA57
Candidatus Papavarcha gen. nov.	ANME-1-THS
Candidatus Papilarcha gen. nov.	JAADEF01
Candidatus Paracarcha gen. nov.	PSPM01
Candidatus Paralarcha gen. nov.	UBA10107
Candidatus Parocarcha gen. nov.	JAADER01
Candidatus Paroparcha gen. nov.	JAADFX01
Candidatus Patibarcha gen. nov.	SURF-58
Candidatus Pavicarcha gen. nov.	UBA92
Candidatus Pavimarcha gen. nov.	SpSt-734
Candidatus Pecunarcha gen. nov.	DTBU01
Candidatus Pedeparcha gen. nov.	BA2
Candidatus Penicarcha gen. nov.	MGIIb-P
Candidatus Pepenarcha gen. nov.	CAIPOI01
Candidatus Perabarcha gen. nov.	BA-19
Candidatus Peracarcha gen. nov.	WYZ-LMO6
Candidatus Peradarcha gen. nov.	DTKF01
Candidatus Peribarcha gen. nov.	JAADFH01
Candidatus Pericarcha gen. nov.	GW2011-AR5
Candidatus Peridarcha gen. nov.	EX4484-2
Candidatus Periparcha gen. nov.	CG1-02-39-14
Candidatus Peroparcha gen. nov.	CG1-02-57-44
Candidatus Petularcha gen. nov.	JABDCJ01
Candidatus Pimenarcha gen. nov.	JdFR-43
Candidatus Pinacarcha gen. nov.	SW-10-68-16
Candidatus Pinifarcha gen. nov.	DTDM01
Candidatus Pinigarcha gen. nov.	UBA10117
Candidatus Pocilarcha gen. nov.	B9-G17
Candidatus Podagarcha gen. nov.	QCWD01
Candidatus Pomifarcha gen. nov.	CG07-land
Candidatus Pudibarcha gen. nov.	M9B1D
Candidatus Pulegarcha gen. nov.	UBA12030
Candidatus Purularcha gen. nov.	AG1
Candidatus Ranunarcha gen. nov.	1-14-0-10-31-34
Candidatus Rarefarcha gen. nov.	DTBI01
Candidatus Ratifarcha gen. nov.	GW2011-AR17
Candidatus Recocarcha gen. nov.	ARS50
Candidatus Recogarcha gen. nov.	ARS10
Candidatus Recorarcha gen. nov.	DTCF01
Candidatus Recucarcha gen. nov.	B17-G17
Candidatus Recumarcha gen. nov.	QMWW01
Candidatus Redacarcha gen. nov.	GCA-2688775
Candidatus Reduvarcha gen. nov.	UBA7939
Candidatus Refacarcha gen. nov.	GCA-2728275
Candidatus Refinarcha gen. nov.	B3-JM-08
Candidatus Refocarcha gen. nov.	EX4484-31
Candidatus Reforarcha gen. nov.	B54-G15
Candidatus Refularcha gen. nov.	B24
Candidatus Refunarcha gen. nov.	EA-27
Candidatus Regifarcha gen. nov.	DSVV01
Candidatus Regigarcha gen. nov.	ECH-B-1
Candidatus Relaparcha gen. nov.	CG1-02-47-40
Candidatus Relecarcha gen. nov.	ARS21
Candidatus Relenarcha gen. nov.	UBA10210
Candidatus Remedarcha gen. nov.	JABDRC01
Candidatus Remularcha gen. nov.	B26-1
Candidatus Renavarcha gen. nov.	UBA467
Candidatus Repagarcha gen. nov.	BOG-1369
Candidatus Repeparcha gen. nov.	JGI-OTU-1
Candidatus Repudarcha gen. nov.	JAADEL01
Candidatus Repurarcha gen. nov.	MWBV01
Candidatus Resacarcha gen. nov.	DRVP01
Candidatus Resalarcha gen. nov.	CADDZS01
Candidatus Resularcha gen. nov.	PL-Br10-U2g16
Candidatus Resurarcha gen. nov.	J060
Candidatus Retecarcha gen. nov.	AD8-1
Candidatus Revecarcha gen. nov.	DSZV01
Candidatus Ridibarcha gen. nov.	VYCS01
Candidatus Rinocarcha gen. nov.	WTCK01
Candidatus Risibarcha gen. nov.	Fen-7
Candidatus Robigarcha gen. nov.	JAAYZC01
Candidatus Rorifarcha gen. nov.	UBA204
Candidatus Rorularcha gen. nov.	CABMGC01
Candidatus Rosacarcha gen. nov.	CAILMQ01
Candidatus Rosararcha gen. nov.	GCA-2685855
Candidatus Rubecarcha gen. nov.	QMWL01
Candidatus Rubefarcha gen. nov.	SM1-50
Candidatus Rubicarcha gen. nov.	CSP1-1
Candidatus Rubigarcha gen. nov.	B72-G16
Candidatus Rudecarcha gen. nov.	QMWT01
Candidatus Rudicarcha gen. nov.	DTDI01
Candidatus Ruricarcha gen. nov.	WYZ-LMO10
Candidatus Rurigarcha gen. nov.	RBG-13-38-9
Candidatus Saburarcha gen. nov.	J110
Candidatus Sacomarcha gen. nov.	CAILAH01
Candidatus Sacoparcha gen. nov.	B1-G15
Candidatus Salubarcha gen. nov.	JdFR-45
Candidatus Sanabarcha gen. nov.	UBA147
Candidatus Sarabarcha gen. nov.	DTJS01
Candidatus Satacarcha gen. nov.	UBA472
Candidatus Saxifarcha gen. nov.	LC-2
Candidatus Saxoparcha gen. nov.	DTJL01
Candidatus Secunarcha gen. nov.	SG8-52-3
Candidatus Selecarcha gen. nov.	MGIIa-L2
Candidatus Selibarcha gen. nov.	UBA492
Candidatus Semaparcha gen. nov.	QNYQ01
Candidatus Semibarcha gen. nov.	B65-G9
Candidatus Semidarcha gen. nov.	EX4572-64
Candidatus Semifarcha gen. nov.	EA-19
Candidatus Semigarcha gen. nov.	B88-G9
Candidatus Semilarcha gen. nov.	NP1466
Candidatus Semiparcha gen. nov.	B47-G15
Candidatus Semivarcha gen. nov.	MGIIa-I
Candidatus Semunarcha gen. nov.	JdFR-13
Candidatus Senacarcha gen. nov.	CABMJK01
Candidatus Seniparcha gen. nov.	SG8-5
Candidatus Seposarcha gen. nov.	JAADDK01
Candidatus Serotarcha gen. nov.	CSBR16-182
Candidatus Sicararcha gen. nov.	CG1-02-47-18
Candidatus Sicinarcha gen. nov.	J156
Candidatus Sicubarcha gen. nov.	UBA203
Candidatus Sicunarcha gen. nov.	UBA153
Candidatus Sifunarcha gen. nov.	QS-1-68-20
Candidatus Siligarcha gen. nov.	UBA10161
Candidatus Siminarcha gen. nov.	GW2011-AR10
Candidatus Sitelarcha gen. nov.	UBA226
Candidatus Socagarcha gen. nov.	SG8-32-3
Candidatus Solacarcha gen. nov.	Tc-Br11-E2g8
Candidatus Solifarcha gen. nov.	UBA285
Candidatus Soliparcha gen. nov.	CG1-02-31-27
Candidatus Solivarcha gen. nov.	SKIA01
Candidatus Sonabarcha gen. nov.	TEKIR-12S
Candidatus Soniparcha gen. nov.	SHMX01
Candidatus Sonivarcha gen. nov.	JWKY01
Candidatus Sotularcha gen. nov.	B24-G9
Candidatus Subabarcha gen. nov.	AAA261-N23
Candidatus Subacarcha gen. nov.	QH-10-67-22
Candidatus Subadarcha gen. nov.	MGIIa-L4
Candidatus Subinarcha gen. nov.	DSQZ01
Candidatus Subodarcha gen. nov.	B82-G9
Candidatus Subofarcha gen. nov.	SBBD01
Candidatus Subucarcha gen. nov.	UBA148
Candidatus Sugilarcha gen. nov.	EX4484-36
Candidatus Supelarcha gen. nov.	UBA582
Candidatus Susicarcha gen. nov.	1-14-0-10-32-24
Candidatus Tabifarcha gen. nov.	EX4484-135
Candidatus Tabitarcha gen. nov.	GW2011-AR20
Candidatus Taraxarcha gen. nov.	B15-G16
Candidatus Taxilarcha gen. nov.	DRBY01
Candidatus Tegimarcha gen. nov.	MVRC01
Candidatus Telefarcha gen. nov.	Sv326
Candidatus Telegarcha gen. nov.	CABMDW01
Candidatus Televarcha gen. nov.	MGIIb-O5
Candidatus Tenebarcha gen. nov.	UBA183
Candidatus Tenemarcha gen. nov.	JdFR-22
Candidatus Tenilarcha gen. nov.	UBA93
Candidatus Tetenarcha gen. nov.	PZKD01
Candidatus Tibicarcha gen. nov.	DSDF01
Candidatus Tigurarcha gen. nov.	BE-D
Candidatus Timefarcha gen. nov.	CAIVOO01
Candidatus Tirocarcha gen. nov.	GW2011-AR9
Candidatus Tirunarcha gen. nov.	WYZ-LMO11
Candidatus Tolutarcha gen. nov.	DTMW01
Candidatus Tomacarcha gen. nov.	B1-Br10-U2g21
Candidatus Tomogarcha gen. nov.	JAADFO01
Candidatus Totidarcha gen. nov.	SCGC-AAA471-B05
Candidatus Tubicarcha gen. nov.	UBA10200
Candidatus Tumefarcha gen. nov.	0-14-0-20-30-16
Candidatus Turibarcha gen. nov.	1-14-0-10-45-29
Candidatus Turicarcha gen. nov.	DTIP01
Candidatus Turifarcha gen. nov.	CAIYYO01
Candidatus Turilarcha gen. nov.	CABMGN01
Candidatus Vacilarcha gen. nov.	GCA-965745
Candidatus Vagabarcha gen. nov.	UBA168
Candidatus Valefarcha gen. nov.	TH5893
Candidatus Vanidarcha gen. nov.	PWHV01
Candidatus Vanitarcha gen. nov.	QENJ01
Candidatus Vatilarcha gen. nov.	UBA9949
Candidatus Vavasarcha gen. nov.	DSBS01
Candidatus Vecorarcha gen. nov.	JABLXE01
Candidatus Vehemarcha gen. nov.	UBA447
Candidatus Vehicarcha gen. nov.	UBA12382
Candidatus Velifarcha gen. nov.	GW2011-AR18
Candidatus Velivarcha gen. nov.	EX4484-218
Candidatus Venabarcha gen. nov.	GLR71
Candidatus Venefarcha gen. nov.	EX4484-15
Candidatus Venunarcha gen. nov.	J072
Candidatus Vepalarcha gen. nov.	JABLTI01
Candidatus Veridarcha gen. nov.	RBG-16-57-9
Candidatus Viburarcha gen. nov.	UBA11998
Candidatus Vicatarcha gen. nov.	JACGMN01
Candidatus Vicecarcha gen. nov.	DTNT01
Candidatus Videlarcha gen. nov.	EX4572-165
Candidatus Vigenarcha gen. nov.	DTBP01
Candidatus Viginarcha gen. nov.	AMARA-1
Candidatus Viliparcha gen. nov.	GCA-002792115
Candidatus Vilitarcha gen. nov.	UBA588
Candidatus Vinacarcha gen. nov.	B79-G9
Candidatus Vinularcha gen. nov.	WYEN01
Candidatus Viragarcha gen. nov.	B33-G15
Candidatus Virecarcha gen. nov.	UBA509
Candidatus Viriparcha gen. nov.	JABMPP01
Candidatus Visifarcha gen. nov.	UBA8886
Candidatus Visocarcha gen. nov.	JAADIF01
Candidatus Vitabarcha gen. nov.	SW-10-69-26
Candidatus Vitifarcha gen. nov.	JdFR-42
Candidatus Vitigarcha gen. nov.	GCA-2686295
Candidatus Vituparcha gen. nov.	DTIM01
Candidatus Vivifarcha gen. nov.	MGIIb-O3
Candidatus Vocamarcha gen. nov.	SP79
Candidatus Vocifarcha gen. nov.	SOIM01
Candidatus Volubarcha gen. nov.	UBA10214
Candidatus Volucarcha gen. nov.	CG-Epi1
Candidatus Volunarcha gen. nov.	DTQO01
Candidatus Voragarcha gen. nov.	UBA10219
Candidatus Xenodarcha gen. nov.	CABMGU01
Candidatus Xenoparcha gen. nov.	DTGH01
Candidatus Xeramarcha gen. nov.	UBA60
Candidatus Xeroparcha gen. nov.	SOJZ01
Candidatus Acidilobus demadiforma sp. nov.	Acidilobus sp003431325
Candidatus Acidilobus funivitica sp. nov.	Acidilobus sp002496425
Candidatus Acidilobus hexamisca sp. nov.	Acidilobus sp000495735
Candidatus Aciduliprofundum tomacitudo sp. nov.	Aciduliprofundum sp000327505
Candidatus Altarchaeum cicilivita sp. nov.	Altarchaeum sp002841105
Candidatus Altarchaeum foricifica sp. nov.	Altarchaeum sp002083985
Candidatus Archaeoglobus bipinivita sp. nov.	Archaeoglobus sp002507545
Candidatus Archaeoglobus bucolisca sp. nov.	Archaeoglobus_A sp002011215
Candidatus Archaeoglobus catabitura sp. nov.	Archaeoglobus_C sp003978865
Candidatus Archaeoglobus cilicilega sp. nov.	Archaeoglobus_A sp002010195
Candidatus Archaeoglobus cobalivita sp. nov.	Archaeoglobus_A sp003662985
Candidatus Archaeoglobus decenigena sp. nov.	Archaeoglobus_B sp003663025
Candidatus Archaeoglobus paracentia sp. nov.	Archaeoglobus_A sp002494625
Candidatus Archaeoglobus solipax sp. nov.	Archaeoglobus_C sp003663055
Candidatus Archaeoglobus sonipivita sp. nov.	Archaeoglobus_A sp002011235
Candidatus Baditarcha caravimonas sp. nov.	IMC4 sp001742785
Candidatus Baroparcha domabastra sp. nov.	BMS3B sp002897955
Candidatus Baroparcha monocastra sp. nov.	BMS3B sp003229935
Candidatus Benemarcha didacitudo sp. nov.	JACCLJ01 sp011358535
Candidatus Benemarcha gabinedo sp. nov.	JACCLJ01 sp013425425
Candidatus Beneparcha volucivita sp. nov.	PIYB01 sp003601835
Candidatus Benevarcha nucifitrix sp. nov.	XQ-INN-246 sp006543045
Candidatus Benifarcha binocousia sp. nov.	B69-G16 sp003649235
Candidatus Benivarcha cerucatio sp. nov.	LKUD01 sp001412355
Candidatus Benivarcha direpitudo sp. nov.	LKUD01 sp013415665
Candidatus Betacarcha paralitudo sp. nov.	SKGA01 sp007117735
Candidatus Bicalarcha capucessa sp. nov.	JdFR-07 sp003601605
Candidatus Bicalarcha cerofitura sp. nov.	JdFR-07 sp002010975
Candidatus Bicaparcha loraritica sp. nov.	EX4484-217-1 sp002254745
Candidatus Bicinarcha siminigena sp. nov.	B12-G17 sp003661905
Candidatus Biciparcha detotivita sp. nov.	GCA-2688925 sp002688925
Candidatus Bicodarcha pocilicella sp. nov.	JAAXVZ01 sp013335235
Candidatus Bicorarcha decinastra sp. nov.	CAIKBN01 sp903825675
Candidatus Bicubarcha refocicella sp. nov.	JABWCK01 sp013360305
Candidatus Bifararcha metabitoga sp. nov.	EX4484-52 sp003660905
Candidatus Bifararcha ranunimonas sp. nov.	EX4484-52 sp002254415
Candidatus Bifisarcha televivita sp. nov.	CABMCB01 sp902384455
Candidatus Bigemarcha cerebago sp. nov.	SKXI01 sp007129135
Candidatus Bigemarcha peripibula sp. nov.	SKXI01 sp007128515
Candidatus Bimetarcha demogatica sp. nov.	J096 sp003694965
Candidatus Bimotarcha dimadatio sp. nov.	DTMT01 sp011355205
Candidatus Binocarcha cohonifica sp. nov.	B78-G9 sp003650975
Candidatus Bipararcha domicicula sp. nov.	JDFR-14 sp002011085
Candidatus Bipatarcha rosaritio sp. nov.	UBA489 sp002505585
Candidatus Bipenarcha laculousia sp. nov.	CABMEV01 sp902385255
Candidatus Bipinarcha depicicula sp. nov.	TEKIR-8 sp008080765
Candidatus Bipinarcha lavabilenta sp. nov.	TEKIR-8 sp004524365
Candidatus Bipinarcha lenimisca sp. nov.	TEKIR-8 sp008080735
Candidatus Bisacarcha papilessa sp. nov.	BA-13 sp005888675
Candidatus Bisacarcha risibitoga sp. nov.	BA-13 sp005888695
Candidatus Bisularcha cucurousia sp. nov.	RumEn-M2 sp002502965
Candidatus Bisularcha laculatio sp. nov.	RumEn-M2 sp001421175
Candidatus Bisularcha pavicigena sp. nov.	RumEn-M2 sp012522645
Candidatus Bisularcha recumatio sp. nov.	RumEn-M2 sp002506255
Candidatus Biverarcha cenobilega sp. nov.	CG10238-14 sp002789635
Candidatus Bonifarcha cimelitudo sp. nov.	QS-4-69-31 sp003021655
Candidatus Bonitarcha conubax sp. nov.	UBA11716 sp9638u
Candidatus Bovicarcha depicimonas sp. nov.	EX4484-205 sp002255045
Candidatus Bucelarcha redacitudo sp. nov.	PCYB01 sp002762845
Candidatus Bugilarcha homulitrix sp. nov.	DTFW01 sp011363025
Candidatus Bulaparcha hemiditudo sp. nov.	UBA186 sp002494765
Candidatus Butubarcha taxilivita sp. nov.	JAADDH01 sp013154035
Candidatus Buxanarcha mahemigena sp. nov.	HR1 sp002926195
Candidatus Buxifarcha coticitura sp. nov.	QEXZ01 sp013180605
Candidatus Buxifarcha cululentia sp. nov.	QEXZ01 sp003160755
Candidatus Buxifarcha funebibra sp. nov.	QEXZ01 sp003661125
Candidatus Buxifarcha repecitia sp. nov.	QEXZ01 sp003601795
Candidatus Cacalarcha peropibula sp. nov.	SpSt-9 sp011333035
Candidatus Cacomarcha decinibra sp. nov.	B14-G2 sp003661385
Candidatus Cacoparcha fecunicella sp. nov.	SKSH01 sp007118075
Candidatus Cacoparcha hiruditio sp. nov.	SKSH01 sp007118145
Candidatus Cadavarcha regigimonas sp. nov.	BM511 sp002867475
Candidatus Cadurarcha hexamicula sp. nov.	PXDW01 sp003564925
Candidatus Caldisphaera defuniforma sp. nov.	Caldisphaera sp002506595
Candidatus Caldisphaera volucugo sp. nov.	Caldisphaera sp002877855
Candidatus Caldivirga cisalitoga sp. nov.	Caldivirga sp001663375
Candidatus Caldivirga lametimonas sp. nov.	Caldivirga sp002506515
Candidatus Caliparcha divolentia sp. nov.	UBA10191 sp10036u
Candidatus Camilarcha domabibra sp. nov.	CAIMOB01 sp903842985
Candidatus Capabarcha caduriforma sp. nov.	CBA1134 sp003021785
Candidatus Capabarcha cicatifica sp. nov.	CBA1134 sp003021175
Candidatus Capabarcha sacopetta sp. nov.	CBA1134 sp003023185
Candidatus Capabarcha sifunousia sp. nov.	CBA1134 sp001950595
Candidatus Capabarcha vagabatio sp. nov.	CBA1134 sp009184545
Candidatus Capilarcha cosigitia sp. nov.	JAADDC01 sp013154145
Candidatus Capucarcha dehisimonia sp. nov.	SpSt-742 sp011335085
Candidatus Capudarcha pulegilega sp. nov.	DSAL01 sp011380095
Candidatus Caravarcha benepentia sp. nov.	WYZ-LMO8 sp003649565
Candidatus Caravarcha catalitia sp. nov.	WYZ-LMO8 sp011369545
Candidatus Caravarcha deciticella sp. nov.	WYZ-LMO8 sp003650865
Candidatus Caravarcha dereciforma sp. nov.	WYZ-LMO8 sp004347965
Candidatus Caravarcha hegumimonia sp. nov.	WYZ-LMO8 sp011605835
Candidatus Caravarcha pedificella sp. nov.	WYZ-LMO8 sp011362155
Candidatus Carecarcha tenemilenta sp. nov.	Tc-Br11-E2g1 sp001564255
Candidatus Carucarcha conaretta sp. nov.	JABMQF01 sp013203345
Candidatus Carunarcha luxuribra sp. nov.	RDOG01 sp011365055
Candidatus Casabarcha detumivita sp. nov.	GCA-2686855 sp002686855
Candidatus Caselarcha domigax sp. nov.	DRZP01 sp011373125
Candidatus Caselarcha recumisca sp. nov.	DRZP01 sp011375535
Candidatus Casigarcha rubefigena sp. nov.	EX4484-58 sp002254665
Candidatus Catabarcha malagitoga sp. nov.	UBA8516 sp8516u
Candidatus Catafarcha lavabifica sp. nov.	CAIRCU01 sp903877165
Candidatus Catagarcha subabessa sp. nov.	PEVX01 sp002780285
Candidatus Cataparcha biverimonas sp. nov.	CS1-C013 sp011773475
Candidatus Catecarcha lutulimonia sp. nov.	UBA11855 sp11852u
Candidatus Categarcha bimotiforma sp. nov.	MP8T-1 sp003345545
Candidatus Categarcha bucelitura sp. nov.	MP8T-1 sp004524565
Candidatus Categarcha catafilenta sp. nov.	MP8T-1 sp004524595
Candidatus Categarcha cibicedo sp. nov.	MP8T-1 sp002825535
Candidatus Categarcha conamitudo sp. nov.	MP8T-1 sp002825465
Candidatus Catilarcha bugiligena sp. nov.	JGI-0000106-J15 sp000405685
Candidatus Catilarcha dececisca sp. nov.	JGI-0000106-J15 sp011363825
Candidatus Catilarcha manibax sp. nov.	JGI-0000106-J15 sp011375845
Candidatus Catilarcha nugigicula sp. nov.	JGI-0000106-J15 sp011364615
Candidatus Catilarcha resurilega sp. nov.	JGI-0000106-J15 sp011337925
Candidatus Catobarcha colopitas sp. nov.	SCGC-AAA252-I15 sp000402775
Candidatus Catocarcha terebessa sp. nov.	DSZD01 sp011364805
Candidatus Celamarcha hexapiforma sp. nov.	PIYF01 sp003601875
Candidatus Celumarcha bacifousia sp. nov.	MGIIa-L3 sp002731395
Candidatus Celumarcha cenodetta sp. nov.	MGIIa-L3 sp002723635
Candidatus Celumarcha cilotessa sp. nov.	MGIIa-L3 sp003602635
Candidatus Celumarcha malivimonia sp. nov.	MGIIa-L3 sp002496845
Candidatus Celumarcha nugacitio sp. nov.	MGIIa-L3 sp11892u
Candidatus Celumarcha sonipicula sp. nov.	MGIIa-L3 sp002722135
Candidatus Celumarcha turibessa sp. nov.	MGIIa-L3 sp002694585
Candidatus Celumarcha veridibra sp. nov.	MGIIa-L3 sp12206u
Candidatus Cemenarcha petulitia sp. nov.	EX4484-224 sp002254545
Candidatus Cenacarcha licenibra sp. nov.	QS-5-70-15 sp003022005
Candidatus Cenarchaeum cacomitio sp. nov.	Cenarchaeum sp003724275
Candidatus Cenarchaeum depecessa sp. nov.	Cenarchaeum sp007570915
Candidatus Cenobarcha valefedo sp. nov.	JdFR-37 sp002010215
Candidatus Cenodarcha divolitio sp. nov.	DTDX01 sp011338225
Candidatus Cenodarcha hemidifica sp. nov.	DTDX01 sp011369655
Candidatus Cenotarcha recogitura sp. nov.	JACEMX01 sp011773785
Candidatus Cenotarcha viripilega sp. nov.	JACEMX01 sp013867335
Candidatus Cepularcha gemebibula sp. nov.	GCA-2687815 sp002687815
Candidatus Cepurarcha fumacitia sp. nov.	PNOQ01 sp013824915
Candidatus Ceracarcha desepastra sp. nov.	B31-G17 sp003649915
Candidatus Cerararcha fetifimonia sp. nov.	B47-G6 sp003663585
Candidatus Cerararcha semapimonas sp. nov.	B47-G6 sp003663565
Candidatus Cerebarcha betacilega sp. nov.	TA-21 sp014523495
Candidatus Cerebarcha cunabibula sp. nov.	TA-21 sp014523595
Candidatus Cerebarcha defasiforma sp. nov.	TA-21 sp005877075
Candidatus Cerebarcha defositrix sp. nov.	TA-21 sp005877345
Candidatus Cerebarcha rutabisca sp. nov.	TA-21 sp014523525
Candidatus Cerevarcha ruricatica sp. nov.	UBA9989 sp9989u
Candidatus Cerifarcha citocilega sp. nov.	Bog-38 sp003158275
Candidatus Cerifarcha cohoressa sp. nov.	Bog-38 sp003162175
Candidatus Cerifarcha puruledo sp. nov.	Bog-38 sp003170935
Candidatus Cerifarcha visifax sp. nov.	Bog-38 sp003139855
Candidatus Cerimarcha delapigena sp. nov.	DRYS01 sp011367275
Candidatus Cerimarcha mutabax sp. nov.	DRYS01 sp011375775
Candidatus Cerofarcha nubificella sp. nov.	UBA10536 sp10536u
Candidatus Ceromarcha benevimonia sp. nov.	CAILMU01 sp013425375
Candidatus Ceromarcha dehoniforma sp. nov.	CAILMU01 sp903835325
Candidatus Ceromarcha luticitia sp. nov.	CAILMU01 sp902386555
Candidatus Cerucarcha cenobax sp. nov.	DSLH01 sp011053435
Candidatus Cetararcha repepetta sp. nov.	WJOV01 sp009618475
Candidatus Cibararcha detecentia sp. nov.	PIYA01 sp003662325
Candidatus Cibararcha penicatio sp. nov.	PIYA01 sp003601785
Candidatus Cibicarcha demogatio sp. nov.	PWGL01 sp003554465
Candidatus Cicararcha decitimonas sp. nov.	JACAEL01 sp013388835
Candidatus Cicatarcha holisax sp. nov.	UBA10216 sp10216u
Candidatus Cicilarcha morigetta sp. nov.	RBG-16-49-10 sp001784635
Candidatus Cilibarcha caravibra sp. nov.	AWOC01 sp000494185
Candidatus Cilicarcha lavabax sp. nov.	CG08-08-20-14 sp002762705
Candidatus Cilotarcha papilisca sp. nov.	UBA10834 sp10834u
Candidatus Cimelarcha dimadedo sp. nov.	CSSED10-269 sp003558235
Candidatus Ciminarcha depecivita sp. nov.	DG-33 sp001515185
Candidatus Ciminarcha minuricella sp. nov.	DG-33 sp004375695
Candidatus Cimitarcha caruniforma sp. nov.	UBA202 sp002502685
Candidatus Cinefarcha homuletta sp. nov.	DTGI01 sp011362975
Candidatus Ciniparcha pavicentia sp. nov.	UBA207 sp002503135
Candidatus Cisalarcha domipivita sp. nov.	UBA141 sp002495315
Candidatus Citiparcha giganousia sp. nov.	WOR-SM1-SCG sp001723855
Candidatus Citiparcha vigenitoga sp. nov.	WOR-SM1-SCG sp001723835
Candidatus Citivarcha fibicibra sp. nov.	UBA9642 sp12459u
Candidatus Citivarcha reforitrix sp. nov.	UBA9642 sp011329125
Candidatus Citocarcha novilitica sp. nov.	PFCU01 sp001872185
Candidatus Citocarcha velifibra sp. nov.	PFCU01 sp002763155
Candidatus Cituvarcha cobalastra sp. nov.	SOJC01 sp004376645
Candidatus Cobalarcha bigemitoga sp. nov.	ARS1301 sp002686355
Candidatus Cocibarcha viburitica sp. nov.	UBA12501 sp10192u
Candidatus Cocolarcha divorimonas sp. nov.	B75-G9 sp003661465
Candidatus Cocolarcha manibatica sp. nov.	B75-G9 sp012962055
Candidatus Codifarcha modifitia sp. nov.	CADBMS01 sp902795935
Candidatus Cohonarcha volubimonia sp. nov.	GW2011-AR15 sp000830295
Candidatus Cohorarcha baditibra sp. nov.	UBA102 sp002509225
Candidatus Cohorarcha bicodilega sp. nov.	UBA102 sp001875425
Candidatus Cohurarcha munifousia sp. nov.	CAIYHQ01 sp903926075
Candidatus Colaparcha secunitas sp. nov.	DRUP01 sp011371845
Candidatus Coleparcha dehisigena sp. nov.	CSSED10-239 sp003559395
Candidatus Colimarcha cohoredo sp. nov.	21-14-0-10-32-9 sp903891505
Candidatus Colimarcha faticibula sp. nov.	21-14-0-10-32-9 sp002762915
Candidatus Coliparcha monogitrix sp. nov.	DTHR01 sp011334665
Candidatus Coloparcha culigilega sp. nov.	JdFR-41 sp002010285
Candidatus Colubarcha denecitica sp. nov.	UBA8480 sp001871495
Candidatus Colubarcha semimitia sp. nov.	UBA8480 sp013425325
Candidatus Conabarcha luculentia sp. nov.	DTKX01 sp011333475
Candidatus Conamarcha divulousia sp. nov.	UBA8941 sp001774245
Candidatus Conamarcha homulimonas sp. nov.	UBA8941 sp8941u
Candidatus Conararcha dehinessa sp. nov.	FEN-987 sp003152955
Candidatus Conararcha derunitoga sp. nov.	FEN-987 sp001768965
Candidatus Conexivisphaera vehicitas sp. nov.	Conexivisphaera sp011054345
Candidatus Conibarcha nicometta sp. nov.	DRYM01 sp011375895
Candidatus Conigarcha fetififica sp. nov.	DTEX01 sp011364715
Candidatus Conigarcha minagilega sp. nov.	DTEX01 sp011366945
Candidatus Conigarcha monumisca sp. nov.	DTEX01 sp011380195
Candidatus Conigarcha senacibra sp. nov.	DTEX01 sp011363705
Candidatus Conigarcha vitigiforma sp. nov.	DTEX01 sp011363945
Candidatus Coninarcha rumifastra sp. nov.	B29-G17 sp003650625
Candidatus Coninarcha velivilenta sp. nov.	B29-G17 sp003649145
Candidatus Coniparcha cocibetta sp. nov.	CABMEP01 sp902385155
Candidatus Conoparcha cepulatio sp. nov.	MGIIb-N2 sp002712285
Candidatus Conoparcha deforimonia sp. nov.	MGIIb-N2 sp002503665
Candidatus Conoparcha diluditura sp. nov.	MGIIb-N2 sp002718215
Candidatus Conoparcha feditago sp. nov.	MGIIb-N2 sp002702985
Candidatus Conoparcha funivugo sp. nov.	MGIIb-N2 sp002506875
Candidatus Conoparcha paracicula sp. nov.	MGIIb-N2 sp002708695
Candidatus Conoparcha refulilega sp. nov.	MGIIb-N2 sp002697105
Candidatus Conoparcha semidugo sp. nov.	MGIIb-N2 sp002497905
Candidatus Conoparcha serotimonas sp. nov.	MGIIb-N2 sp002502625
Candidatus Conoparcha subodicella sp. nov.	MGIIb-N2 sp002503045
Candidatus Conoparcha vacilitudo sp. nov.	MGIIb-N2 sp002708015
Candidatus Conoparcha viragilega sp. nov.	MGIIb-N2 sp002713585
Candidatus Conubarcha refunitas sp. nov.	DSQK01 sp011331795
Candidatus Corocarcha catafitio sp. nov.	ARS1285 sp002688875
Candidatus Corocarcha dicanimonas sp. nov.	ARS1285 sp002688165
Candidatus Corocarcha resulilega sp. nov.	ARS1285 sp002688335
Candidatus Cosidarcha bicubax sp. nov.	J152 sp003694525
Candidatus Cotenarcha bonifatica sp. nov.	RBG-13-33-26 sp012798335
Candidatus Cotenarcha coninigena sp. nov.	RBG-13-33-26 sp001786415
Candidatus Cotenarcha ridibilega sp. nov.	RBG-13-33-26 sp902386025
Candidatus Coticarcha manubitudo sp. nov.	CAITNU01 sp903893865
Candidatus Coturarcha decacivita sp. nov.	QS-4-70-19 sp003020985
Candidatus Coturarcha futatedo sp. nov.	QS-4-70-19 sp007421925
Candidatus Cucurarcha colimitrix sp. nov.	SCSR01 sp004297575
Candidatus Cuferarcha cicatitia sp. nov.	CSSed11-243R1 sp003563585
Candidatus Cuferarcha cocibiforma sp. nov.	CSSed11-243R1 sp007133845
Candidatus Culigarcha monodatio sp. nov.	SpSt-1120 sp011373045
Candidatus Culularcha fefelessa sp. nov.	JAADFI01 sp013152905
Candidatus Cunabarcha cilibibra sp. nov.	1-14-0-10-34-76 sp002763075
Candidatus Curabarcha mirifitio sp. nov.	CAIKOA01 sp903828955
Candidatus Curacarcha bicalitia sp. nov.	MGIIa-L1 sp9354u
Candidatus Curacarcha cemenigena sp. nov.	MGIIa-L1 sp002702945
Candidatus Curacarcha cerifatio sp. nov.	MGIIa-L1 sp002170315
Candidatus Curacarcha cerifousia sp. nov.	MGIIa-L1 sp002499545
Candidatus Curacarcha cilibentia sp. nov.	MGIIa-L1 sp000246735
Candidatus Curacarcha cimelitrix sp. nov.	MGIIa-L1 sp002505355
Candidatus Curacarcha codifitudo sp. nov.	MGIIa-L1 sp002499015
Candidatus Curacarcha curotibula sp. nov.	MGIIa-L1 sp002502605
Candidatus Curacarcha delebibra sp. nov.	MGIIa-L1 sp8160u
Candidatus Curacarcha depecitoga sp. nov.	MGIIa-L1 sp002506025
Candidatus Curacarcha depelatica sp. nov.	MGIIa-L1 sp002172355
Candidatus Curacarcha derunitia sp. nov.	MGIIa-L1 sp009887195
Candidatus Curacarcha dilibibula sp. nov.	MGIIa-L1 sp002506275
Candidatus Curacarcha diluviforma sp. nov.	MGIIa-L1 sp003602645
Candidatus Curacarcha domabitura sp. nov.	MGIIa-L1 sp002687075
Candidatus Curacarcha ducilibula sp. nov.	MGIIa-L1 sp002727485
Candidatus Curacarcha fatifastra sp. nov.	MGIIa-L1 sp003602575
Candidatus Curacarcha fiducugo sp. nov.	MGIIa-L1 sp002499705
Candidatus Curacarcha foricatica sp. nov.	MGIIa-L1 sp002726395
Candidatus Curacarcha hirunax sp. nov.	MGIIa-L1 sp002697705
Candidatus Curacarcha lacinilenta sp. nov.	MGIIa-L1 sp011526375
Candidatus Curacarcha ludimimonas sp. nov.	MGIIa-L1 sp002688825
Candidatus Curacarcha luxurilenta sp. nov.	MGIIa-L1 sp002729095
Candidatus Curacarcha molecivita sp. nov.	MGIIa-L1 sp009937205
Candidatus Curacarcha nocenitas sp. nov.	MGIIa-L1 sp002496955
Candidatus Curacarcha pavicitura sp. nov.	MGIIa-L1 sp002721085
Candidatus Curacarcha peripilenta sp. nov.	MGIIa-L1 sp009937025
Candidatus Curacarcha rorifentia sp. nov.	MGIIa-L1 sp902520595
Candidatus Curacarcha satacifica sp. nov.	MGIIa-L1 sp009887095
Candidatus Curacarcha telefilega sp. nov.	MGIIa-L1 sp003602605
Candidatus Curacarcha tiruniforma sp. nov.	MGIIa-L1 sp8725u
Candidatus Curacarcha turicilenta sp. nov.	MGIIa-L1 sp9513u
Candidatus Curacarcha vatiliforma sp. nov.	MGIIa-L1 sp002495945
Candidatus Curacarcha venefitio sp. nov.	MGIIa-L1 sp012959845
Candidatus Curacarcha videlitas sp. nov.	MGIIa-L1 sp8734u
Candidatus Curacarcha xenopentia sp. nov.	MGIIa-L1 sp002495535
Candidatus Curacarcha xeropitura sp. nov.	MGIIa-L1 sp9596u
Candidatus Curotarcha genocedo sp. nov.	0-14-0-20-59-11 sp902384935
Candidatus Curotarcha pavicicula sp. nov.	0-14-0-20-59-11 sp002763345
Candidatus Cuticarcha fidenax sp. nov.	QS-5-68-33 sp003023785
Candidatus Debucarcha bicipousia sp. nov.	CSBR16-154 sp007117405
Candidatus Decacarcha cicaratica sp. nov.	DRGT01 sp011055585
Candidatus Decamarcha bigaricula sp. nov.	JdFR-19 sp002010075
Candidatus Decamarcha depasicula sp. nov.	JdFR-19 sp003661015
Candidatus Decaparcha telefitura sp. nov.	DTOY01 sp011358085
Candidatus Decatarcha lametifica sp. nov.	GW2011-AR13 sp9966u
Candidatus Dececarcha cohoretta sp. nov.	JAAOZO01 sp011605715
Candidatus Decenarcha ridibimonas sp. nov.	UBA73 sp002496015
Candidatus Decinarcha catabedo sp. nov.	B23 sp001593875
Candidatus Decitarcha cuferatica sp. nov.	MVQI01 sp002067795
Candidatus Decomarcha sacomentia sp. nov.	0-14-0-20-34-12 sp002779065
Candidatus Decucarcha giganicella sp. nov.	J091 sp003695045
Candidatus Decularcha revecibula sp. nov.	UBA11576 sp11576u
Candidatus Decunarcha homoligena sp. nov.	B3-WOES sp005222965
Candidatus Decuparcha ceraribula sp. nov.	GCA-001856825 sp001856825
Candidatus Decuparcha pericastra sp. nov.	GCA-001856825 sp011358095
Candidatus Dedigarcha defasigena sp. nov.	VBQI01 sp008297865
Candidatus Defacarcha sacopitrix sp. nov.	ARS1178 sp002688325
Candidatus Defalarcha mavorigena sp. nov.	PFCY01 sp002763085
Candidatus Defanarcha fibicisca sp. nov.	ARS1309 sp002688015
Candidatus Defararcha catabitudo sp. nov.	JAAXQB01 sp012329085
Candidatus Defenarcha tirocitura sp. nov.	JABXJV01 sp013375355
Candidatus Defesarcha decamentia sp. nov.	UBA71 sp006954425
Candidatus Defesarcha depetilega sp. nov.	UBA71 sp002506425
Candidatus Defesarcha lubenitoga sp. nov.	UBA71 sp002504405
Candidatus Defesarcha refiniforma sp. nov.	UBA71 sp006954465
Candidatus Defesarcha solifugo sp. nov.	UBA71 sp002504495
Candidatus Defesarcha tabitatio sp. nov.	UBA71 sp900767505
Candidatus Defetarcha delubastra sp. nov.	DTCV01 sp011337845
Candidatus Defetarcha ludifivita sp. nov.	DTCV01 sp011366425
Candidatus Deforarcha divolago sp. nov.	B1Sed10-29 sp003551125
Candidatus Deforarcha vigenitica sp. nov.	B1Sed10-29 sp003553825
Candidatus Defosarcha cimelousia sp. nov.	B24-G1 sp003662535
Candidatus Defularcha bonititio sp. nov.	UBA543 sp002502135
Candidatus Defunarcha lubenifica sp. nov.	QMZJ01 sp003663115
Candidatus Dehinarcha fibicicula sp. nov.	GCA-2688265 sp002688265
Candidatus Dehisarcha penecitoga sp. nov.	UBA328 sp002506905
Candidatus Dehisarcha verifilenta sp. nov.	UBA328 sp012719315
Candidatus Delacarcha decacax sp. nov.	DTGE01 sp011389385
Candidatus Delaparcha mimogicula sp. nov.	CAIQQL01 sp903873955
Candidatus Delebarcha xeropessa sp. nov.	J104 sp003694495
Candidatus Delecarcha manupugo sp. nov.	PWVO01 sp003561825
Candidatus Delubarcha verecago sp. nov.	PSPT01 sp004195635
Candidatus Delucarcha holisitura sp. nov.	B1SED10-34 sp003551065
Candidatus Demadarcha cenoticula sp. nov.	NZ13-MG1 sp011363045
Candidatus Demadarcha desepetta sp. nov.	NZ13-MG1 sp011364235
Candidatus Demadarcha vivifugo sp. nov.	NZ13-MG1 sp003056285
Candidatus Demagarcha locelitica sp. nov.	B39-G2 sp003661185
Candidatus Democarcha desucedo sp. nov.	HEL-GB-A sp013375455
Candidatus Democarcha murelimonia sp. nov.	HEL-GB-A sp013375405
Candidatus Democarcha tenebatio sp. nov.	HEL-GB-A sp005191415
Candidatus Demogarcha cocodigena sp. nov.	B12-G16 sp003650925
Candidatus Denavarcha duricifica sp. nov.	GCA-2688355 sp002688355
Candidatus Denicarcha defenibula sp. nov.	SD8 sp001412335
Candidatus Denicarcha nefanilenta sp. nov.	SD8 sp002509485
Candidatus Denigarcha detepousia sp. nov.	PFDC01 sp002763035
Candidatus Denixarcha buxifatio sp. nov.	EX4484-6 sp002254385
Candidatus Denomarcha galacicula sp. nov.	WYEQ01 sp009904015
Candidatus Denorarcha munimimonia sp. nov.	B91-G9 sp003650935
Candidatus Denunarcha telefetta sp. nov.	WUQV01 sp009889585
Candidatus Depacarcha nicomifica sp. nov.	CABMGE01 sp902385625
Candidatus Depasarcha cinipibula sp. nov.	DRZQ01 sp011055445
Candidatus Depasarcha cotenisca sp. nov.	DRZQ01 sp011053655
Candidatus Depasarcha mahemitrix sp. nov.	DRZQ01 sp011372935
Candidatus Depasarcha mutabetta sp. nov.	DRZQ01 sp011369665
Candidatus Depecarcha nocumilega sp. nov.	GCA-2687795 sp002687795
Candidatus Depelarcha cicaribula sp. nov.	UBA287 sp011620765
Candidatus Depelarcha repuritica sp. nov.	UBA287 sp002495235
Candidatus Depicarcha cacopitas sp. nov.	PWVY01 sp003561665
Candidatus Depocarcha megalimonia sp. nov.	ASMP01 sp000405225
Candidatus Depoparcha purulifica sp. nov.	SW-9-67-25 sp003022745
Candidatus Depubarcha cilotifica sp. nov.	B66-G16 sp003649085
Candidatus Depuparcha retecitoga sp. nov.	UBA9640 sp9640u
Candidatus Derecarcha necopimonas sp. nov.	TA-20 sp013287585
Candidatus Derecarcha papavitudo sp. nov.	TA-20 sp005877305
Candidatus Derecarcha verifimonas sp. nov.	TA-20 sp007280335
Candidatus Derelarcha decinitrix sp. nov.	DTU008 sp001421185
Candidatus Derelarcha desoretta sp. nov.	DTU008 sp002498285
Candidatus Derelarcha dupunitas sp. nov.	DTU008 sp012519255
Candidatus Derelarcha navicilenta sp. nov.	DTU008 sp002504525
Candidatus Derelarcha ranunimonia sp. nov.	DTU008 sp012518185
Candidatus Derelarcha turifibula sp. nov.	DTU008 sp001512965
Candidatus Derunarcha depocax sp. nov.	JAADCV01 sp013154235
Candidatus Desacarcha decupivita sp. nov.	SM23-78 sp001595785
Candidatus Desacarcha verifitudo sp. nov.	SM23-78 sp011372335
Candidatus Deseparcha colopitoga sp. nov.	GW2011-AR1 sp903831045
Candidatus Deseparcha mirabetta sp. nov.	GW2011-AR1 sp009992215
Candidatus Deseparcha pinifetta sp. nov.	GW2011-AR1 sp002762735
Candidatus Deseparcha pinigibra sp. nov.	GW2011-AR1 sp009992175
Candidatus Desomarcha cacalentia sp. nov.	WRER01 sp009779205
Candidatus Desonarcha bipatitudo sp. nov.	UBA493 sp002499505
Candidatus Desonarcha conopax sp. nov.	UBA493 sp002687735
Candidatus Desonarcha repurastra sp. nov.	UBA493 sp002762975
Candidatus Desorarcha catecicella sp. nov.	RBG-16-68-12 sp005878385
Candidatus Desorarcha cerimifica sp. nov.	RBG-16-68-12 sp005879045
Candidatus Desorarcha corocifica sp. nov.	RBG-16-68-12 sp005878395
Candidatus Desorarcha cuferibra sp. nov.	RBG-16-68-12 sp011331255
Candidatus Desorarcha decucax sp. nov.	RBG-16-68-12 sp005878325
Candidatus Desorarcha decupitura sp. nov.	RBG-16-68-12 sp005878525
Candidatus Desorarcha deforicula sp. nov.	RBG-16-68-12 sp005878615
Candidatus Desorarcha delapitas sp. nov.	RBG-16-68-12 sp005879015
Candidatus Desorarcha derunifica sp. nov.	RBG-16-68-12 sp005878515
Candidatus Desorarcha detumitrix sp. nov.	RBG-16-68-12 sp001800745
Candidatus Desorarcha gasomitudo sp. nov.	RBG-16-68-12 sp011362635
Candidatus Desorarcha ludibicula sp. nov.	RBG-16-68-12 sp001800825
Candidatus Desorarcha maxiledo sp. nov.	RBG-16-68-12 sp005878985
Candidatus Desorarcha medimiforma sp. nov.	RBG-16-68-12 sp005878635
Candidatus Desorarcha minagitura sp. nov.	RBG-16-68-12 sp005878485
Candidatus Desorarcha pabilitio sp. nov.	RBG-16-68-12 sp005878995
Candidatus Desorarcha paracibra sp. nov.	RBG-16-68-12 sp005878415
Candidatus Desorarcha selecugo sp. nov.	RBG-16-68-12 sp005879065
Candidatus Desorarcha veridedo sp. nov.	RBG-16-68-12 sp005878665
Candidatus Desorarcha vinacicella sp. nov.	RBG-16-68-12 sp8695u
Candidatus Desucarcha cocibilega sp. nov.	CAISET01 sp903884505
Candidatus Desuparcha ficulitas sp. nov.	SW-4-43-9 sp003009815
Candidatus Desuparcha venunifica sp. nov.	SW-4-43-9 sp003009795
Candidatus Desurarcha vitifago sp. nov.	DRYY01 sp011375665
Candidatus Detecarcha sitelastra sp. nov.	UBA206 sp002503105
Candidatus Detenarcha volunibra sp. nov.	J101 sp003695435
Candidatus Deteparcha bicubilenta sp. nov.	LCB-4 sp001940665
Candidatus Detesarcha cerifisca sp. nov.	B1-Br10-U2g19 sp001563875
Candidatus Detesarcha nubigatica sp. nov.	B1-Br10-U2g19 sp001563905
Candidatus Detorarcha loraritio sp. nov.	QMZP01 sp003663225
Candidatus Detosarcha podagilega sp. nov.	ISO4-G1 sp002506175
Candidatus Detosarcha semilimonia sp. nov.	ISO4-G1 sp001563305
Candidatus Detotarcha cosidilenta sp. nov.	GCA-2726865 sp014381835
Candidatus Detotarcha venefessa sp. nov.	GCA-2726865 sp002726865
Candidatus Detumarcha celamedo sp. nov.	JACAEJ01 sp013388925
Candidatus Detumarcha fetififorma sp. nov.	JACAEJ01 sp011358735
Candidatus Devecarcha maledugo sp. nov.	JAADFM01 sp013152845
Candidatus Dibaparcha bugilivita sp. nov.	CABMGO01 sp902385655
Candidatus Dibucarcha melilitas sp. nov.	SKVC01 sp007129655
Candidatus Dicanarcha venabetta sp. nov.	JABDBI01 sp013288705
Candidatus Dicibarcha dilemessa sp. nov.	JACAEI01 sp013388905
Candidatus Dicibarcha necopitica sp. nov.	JACAEI01 sp013388895
Candidatus Dicimarcha refinugo sp. nov.	UBA10204 sp10204u
Candidatus Dilacarcha detepigena sp. nov.	GCA-002838935 sp002838935
Candidatus Dilemarcha nugacax sp. nov.	UBA213 sp011331095
Candidatus Dilemarcha verifedo sp. nov.	UBA213 sp002713325
Candidatus Dilibarcha cicarousia sp. nov.	UBA284 sp002499185
Candidatus Dilicarcha monocimonas sp. nov.	MVRE01 sp903900025
Candidatus Dilicarcha solivitoga sp. nov.	MVRE01 sp002067895
Candidatus Dilogarcha bicipessa sp. nov.	MGIIb-Q1 sp012959435
Candidatus Dilogarcha categentia sp. nov.	MGIIb-Q1 sp002727675
Candidatus Dilogarcha culibigena sp. nov.	MGIIb-Q1 sp002505495
Candidatus Dilogarcha debucitoga sp. nov.	MGIIb-Q1 sp012964335
Candidatus Dilogarcha nocenitudo sp. nov.	MGIIb-Q1 sp002685895
Candidatus Dilogarcha ratifigena sp. nov.	MGIIb-Q1 sp014384685
Candidatus Dilogarcha xeramatio sp. nov.	MGIIb-Q1 sp002725475
Candidatus Diludarcha subofitoga sp. nov.	B67-G16 sp003650675
Candidatus Diluvarcha celumicella sp. nov.	EX4484-121 sp003660635
Candidatus Diluvarcha desonedo sp. nov.	EX4484-121 sp002255105
Candidatus Dimacarcha refocedo sp. nov.	CS3-C152 sp011772645
Candidatus Dimadarcha catapugo sp. nov.	SpSt-28 sp011047985
Candidatus Dimidarcha bugiledo sp. nov.	UBA184 sp013044425
Candidatus Dimidarcha cimelitura sp. nov.	UBA184 sp002495185
Candidatus Dimidarcha defalitoga sp. nov.	UBA184 sp013290045
Candidatus Dimidarcha xeramivita sp. nov.	UBA184 sp002503985
Candidatus Diminarcha saxifitudo sp. nov.	UBA9915 sp9915u
Candidatus Dinuparcha locupicula sp. nov.	B5-G16 sp003662995
Candidatus Diponarcha cenobatio sp. nov.	B25 sp001593855
Candidatus Diponarcha gerunisca sp. nov.	B25 sp003662515
Candidatus Diponarcha telegilega sp. nov.	B25 sp003662485
Candidatus Diponarcha vacilicula sp. nov.	B25 sp003662305
Candidatus Direcarcha solififorma sp. nov.	UBA12276 sp8261u
Candidatus Direparcha bacifitudo sp. nov.	WTHC01 sp011523285
Candidatus Diritarcha colutitura sp. nov.	DSCA01 sp011049295
Candidatus Disidarcha detesimonia sp. nov.	EX4572-44 sp002254825
Candidatus Disidarcha domicitas sp. nov.	EX4572-44 sp002255135
Candidatus Divolarcha hemidax sp. nov.	PWWA01 sp003560545
Candidatus Divolarcha vatilatica sp. nov.	PWWA01 sp007131205
Candidatus Divolarcha vatililenta sp. nov.	PWWA01 sp003562145
Candidatus Divorarcha cepurivita sp. nov.	JdFR-21 sp002011165
Candidatus Divorarcha semipax sp. nov.	JdFR-21 sp014361165
Candidatus Divularcha calipastra sp. nov.	J144 sp003694055
Candidatus Documarcha malivilega sp. nov.	ARS23 sp002686195
Candidatus Domabarcha cadurax sp. nov.	OWC5 sp003345555
Candidatus Domabarcha venabessa sp. nov.	OWC5 sp003345595
Candidatus Domicarcha cemenimonia sp. nov.	B15-G2 sp003649445
Candidatus Domicarcha semififorma sp. nov.	B15-G2 sp003650815
Candidatus Domigarcha lucubitoga sp. nov.	B44-G15 sp003649845
Candidatus Domiparcha rubecilenta sp. nov.	B50-G16 sp003663345
Candidatus Doxolarcha curacugo sp. nov.	VadinCA11 sp002509405
Candidatus Doxolarcha favonitoga sp. nov.	VadinCA11 sp002505345
Candidatus Doxolarcha furibax sp. nov.	VadinCA11 sp002498365
Candidatus Doxolarcha furibiforma sp. nov.	VadinCA11 sp002498605
Candidatus Doxolarcha palifimonia sp. nov.	VadinCA11 sp011620825
Candidatus Ducilarcha conifitia sp. nov.	CAIOIN01 sp903858385
Candidatus Duponarcha locupiforma sp. nov.	CABMDC01 sp902384795
Candidatus Dupunarcha lapicicula sp. nov.	HRBIN02 sp009889515
Candidatus Dupunarcha maledilega sp. nov.	HRBIN02 sp011373505
Candidatus Dupunarcha nitelessa sp. nov.	HRBIN02 sp011373385
Candidatus Dupunarcha tiguretta sp. nov.	HRBIN02 sp002898395
Candidatus Duricarcha decinatio sp. nov.	DSZF01 sp011605825
Candidatus Duricarcha defulentia sp. nov.	DSZF01 sp011370515
Candidatus Duricarcha nocenicula sp. nov.	DSZF01 sp011372955
Candidatus Duricarcha repudicula sp. nov.	DSZF01 sp011367155
Candidatus Ethanoperedens visibitudo sp. nov.	Ethanoperedens sp004212095
Candidatus Facunarcha categitica sp. nov.	TH5896 sp009377575
Candidatus Facunarcha dececicula sp. nov.	TH5896 sp014523625
Candidatus Facunarcha lavabibula sp. nov.	TH5896 sp014523695
Candidatus Facunarcha tomacago sp. nov.	TH5896 sp014523665
Candidatus Famelarcha xeropitas sp. nov.	DSAX01 sp011046235
Candidatus Faticarcha caselastra sp. nov.	B46-G15 sp003662205
Candidatus Fatifarcha colopitrix sp. nov.	JAAOZN01 sp011605775
Candidatus Fatifarcha semigentia sp. nov.	JAAOZN01 sp011355215
Candidatus Fatilarcha bipinitia sp. nov.	PUNK01 sp003552585
Candidatus Favilarcha canacatica sp. nov.	SOJA01 sp004376975
Candidatus Favonarcha defalitio sp. nov.	DRAE01 sp011041895
Candidatus Fecularcha cosigastra sp. nov.	CG1-02-33-12 sp002762865
Candidatus Fecunarcha defasatio sp. nov.	DTGL01 sp011334955
Candidatus Fefelarcha delucetta sp. nov.	SZUA-236 sp002923215
Candidatus Fefelarcha holisilenta sp. nov.	SZUA-236 sp003230355
Candidatus Feficarcha cinefitudo sp. nov.	SICU01 sp009694755
Candidatus Femelarcha dicimibra sp. nov.	DTIH01 sp011334515
Candidatus Ferroplasma cocolitio sp. nov.	Ferroplasma sp002505185
Candidatus Fetifarcha calipitrix sp. nov.	MGIIb-O2 sp902593945
Candidatus Fetifarcha delubitio sp. nov.	MGIIb-O2 sp002495525
Candidatus Fetifarcha dinupatio sp. nov.	MGIIb-O2 sp902514485
Candidatus Fetifarcha lugubatio sp. nov.	MGIIb-O2 sp002504905
Candidatus Fetifarcha mirabitia sp. nov.	MGIIb-O2 sp002498985
Candidatus Fetifarcha monocilenta sp. nov.	MGIIb-O2 sp002494975
Candidatus Fetifarcha navifatio sp. nov.	MGIIb-O2 sp002497245
Candidatus Fetifarcha peracetta sp. nov.	MGIIb-O2 sp002499785
Candidatus Fetifarcha reforousia sp. nov.	MGIIb-O2 sp002686525
Candidatus Fetifarcha senipigena sp. nov.	MGIIb-O2 sp002730775
Candidatus Fetifarcha seposatica sp. nov.	MGIIb-O2 sp902511005
Candidatus Fetifarcha tolutentia sp. nov.	MGIIb-O2 sp002685315
Candidatus Fetifarcha vavasitia sp. nov.	MGIIb-O2 sp004195525
Candidatus Fetutarcha dibucugo sp. nov.	JABABT01 sp014238095
Candidatus Fibicarcha colutisca sp. nov.	UBA525 sp10207u
Candidatus Fibicarcha funebago sp. nov.	UBA525 sp002498125
Candidatus Ficedarcha cucuricella sp. nov.	JAAEEP01 sp013415695
Candidatus Ficularcha panopitudo sp. nov.	JAAZKV01 sp012799645
Candidatus Ficularcha rosacitura sp. nov.	JAAZKV01 sp002068885
Candidatus Ficularcha tibicousia sp. nov.	JAAZKV01 sp902385225
Candidatus Fidenarcha catafibra sp. nov.	TH1177 sp014523515
Candidatus Fidenarcha momorentia sp. nov.	TH1177 sp014523485
Candidatus Fiducarcha disidatica sp. nov.	SMTZ1-83 sp011364985
Candidatus Fiducarcha recumibula sp. nov.	SMTZ1-83 sp011365025
Candidatus Fiducarcha sonabigena sp. nov.	SMTZ1-83 sp001563325
Candidatus Figilarcha manubimonia sp. nov.	UBA8471 sp001871535
Candidatus Filifarcha capilousia sp. nov.	UBA583 sp002506365
Candidatus Filifarcha pinigitica sp. nov.	UBA583 sp013215525
Candidatus Forabarcha panificella sp. nov.	ANME1a sp003194425
Candidatus Foricarcha resalifica sp. nov.	UBA119 sp002505945
Candidatus Forinarcha dibapitudo sp. nov.	GCA-2688965 sp002688965
Candidatus Fuligarcha cerebatio sp. nov.	DSLF01 sp011051215
Candidatus Fumacarcha turicicella sp. nov.	DSFO01 sp011056475
Candidatus Fumifarcha decomicella sp. nov.	B24-2 sp002490245
Candidatus Funamarcha funivigena sp. nov.	SKIS01 sp007117755
Candidatus Funamarcha volubitura sp. nov.	SKIS01 sp007116295
Candidatus Funebarcha fatifibra sp. nov.	DRIF01 sp011052825
Candidatus Funivarcha cosigilenta sp. nov.	SpSt-1190 sp011049195
Candidatus Furibarcha detosiforma sp. nov.	QMZZ01 sp003663445
Candidatus Fusifarcha dimadibra sp. nov.	CAIPHS01 sp903864915
Candidatus Futatarcha derecifica sp. nov.	JAAEEW01 sp013415595
Candidatus Galacarcha tomogimonia sp. nov.	LC-3 sp001940645
Candidatus Gasifarcha detenibra sp. nov.	BIN-L-1 sp003096235
Candidatus Gasifarcha lanifastra sp. nov.	BIN-L-1 sp004376385
Candidatus Gasifarcha viburetta sp. nov.	BIN-L-1 sp003096255
Candidatus Gasomarcha capudax sp. nov.	UBA349 sp002839705
Candidatus Gasomarcha corocatio sp. nov.	UBA349 sp002509745
Candidatus Genufarcha benemousia sp. nov.	QMZS01 sp003663295
Candidatus Genufarcha subadilenta sp. nov.	QMZS01 sp003663355
Candidatus Geoglobus conarimonia sp. nov.	Geoglobus sp002494725
Candidatus Gerunarcha dimacicula sp. nov.	B14-G17 sp003649515
Candidatus Giganarcha catagitoga sp. nov.	MGIIb-O1 sp002496905
Candidatus Giganarcha culigago sp. nov.	MGIIb-O1 sp002498525
Candidatus Giganarcha dehisax sp. nov.	MGIIb-O1 sp002685415
Candidatus Giganarcha diluvatio sp. nov.	MGIIb-O1 sp002502365
Candidatus Giganarcha direpilega sp. nov.	MGIIb-O1 sp002502175
Candidatus Giganarcha doxoletta sp. nov.	MGIIb-O1 sp002708385
Candidatus Giganarcha feculilega sp. nov.	MGIIb-O1 sp002497895
Candidatus Giganarcha genocibula sp. nov.	MGIIb-O1 sp12570u
Candidatus Giganarcha mirabitudo sp. nov.	MGIIb-O1 sp902560445
Candidatus Giganarcha notabatica sp. nov.	MGIIb-O1 sp8684u
Candidatus Giganarcha notacax sp. nov.	MGIIb-O1 sp002497025
Candidatus Giganarcha pavimatica sp. nov.	MGIIb-O1 sp002457595
Candidatus Giganarcha recucugo sp. nov.	MGIIb-O1 sp002457555
Candidatus Giganarcha repagitoga sp. nov.	MGIIb-O1 sp002498725
Candidatus Habacarcha vatilastra sp. nov.	JACAFH01 sp013538715
Candidatus Hadarchaeum demulitas sp. nov.	Hadarchaeum sp014361095
Candidatus Haladaptatus gasomitas sp. nov.	Haladaptatus sp001625445
Candidatus Haladaptatus homogibula sp. nov.	Haladaptatus sp003298465
Candidatus Halapricum cacopitudo sp. nov.	Halapricum sp009741825
Candidatus Halegenticoccus nutabibra sp. nov.	Halegenticoccus sp004116405
Candidatus Haloarcula cacomisca sp. nov.	Haloarcula sp005406125
Candidatus Haloarcula gasifax sp. nov.	Haloarcula sp001485575
Candidatus Haloarcula sanabitio sp. nov.	Haloarcula sp008729015
Candidatus Halobacterium bipalastra sp. nov.	Halobacterium sp009741975
Candidatus Halobacterium culigastra sp. nov.	Halobacterium sp000230955
Candidatus Halobacterium galacitica sp. nov.	Halobacterium sp011734195
Candidatus Halobacterium metapugo sp. nov.	Halobacterium sp009831555
Candidatus Halobacterium sicubago sp. nov.	Halobacterium sp001485535
Candidatus Halobaculum codififorma sp. nov.	Halobaculum sp013402875
Candidatus Halobaculum denorousia sp. nov.	Halobaculum sp009831625
Candidatus Halobaculum detenedo sp. nov.	Halobaculum sp003020945
Candidatus Halobaculum divorastra sp. nov.	Halobaculum sp013401515
Candidatus Halobellus deculimonia sp. nov.	Halobellus sp003665925
Candidatus Halobellus dilemiforma sp. nov.	Halobellus sp014212355
Candidatus Halobellus verecilenta sp. nov.	Halobellus sp003665935
Candidatus Halococcus cinipimonas sp. nov.	Halococcus sp003022925
Candidatus Halococcus desonentia sp. nov.	Halococcus sp003022685
Candidatus Halococcus detecago sp. nov.	Halococcus sp003021705
Candidatus Halococcus divulitura sp. nov.	Halococcus sp003021045
Candidatus Halococcus monopago sp. nov.	Halococcus sp003021725
Candidatus Halococcus recoriforma sp. nov.	Halococcus sp003021235
Candidatus Haloferax capabedo sp. nov.	Haloferax sp001482285
Candidatus Haloferax cucurisca sp. nov.	Haloferax sp009674625
Candidatus Haloferax direcigena sp. nov.	Haloferax sp009674585
Candidatus Haloferax pericitoga sp. nov.	Haloferax sp001469875
Candidatus Haloferax repagessa sp. nov.	Haloferax sp001469865
Candidatus Haloferax secunentia sp. nov.	Haloferax sp009674605
Candidatus Halohasta dilecedo sp. nov.	Halohasta sp001563795
Candidatus Halohasta mutabilenta sp. nov.	Halohasta sp003554115
Candidatus Halolamina cuticago sp. nov.	Halolamina sp000224475
Candidatus Halolamina lapicigena sp. nov.	Halolamina sp002025255
Candidatus Halomarina benepastra sp. nov.	Halomarina sp003021975
Candidatus Halomicroarcula recogitia sp. nov.	Halomicroarcula sp003020925
Candidatus Halomicroarcula veliviforma sp. nov.	Halomicroarcula sp003021755
Candidatus Halomicroarcula venucibra sp. nov.	Halomicroarcula sp004681185
Candidatus Halomicrobium luculicella sp. nov.	Halomicrobium sp003021685
Candidatus Halomicrobium perexitoga sp. nov.	Halomicrobium sp009617995
Candidatus Halonotius decenatio sp. nov.	Halonotius sp003605575
Candidatus Halonotius dicibicula sp. nov.	Halonotius sp000496215
Candidatus Haloquadratum velifimonas sp. nov.	Haloquadratum sp000416005
Candidatus Halorhabdus depetitoga sp. nov.	Halorhabdus sp009690625
Candidatus Halorhabdus duponibula sp. nov.	Halorhabdus sp004944975
Candidatus Halorhabdus hibisitia sp. nov.	Halorhabdus sp013839425
Candidatus Halorientalis biparatio sp. nov.	Halorientalis sp004118325
Candidatus Halorientalis homolibula sp. nov.	Halorientalis sp005049285
Candidatus Halorientalis recoritica sp. nov.	Halorientalis sp001989615
Candidatus Halorubellus vepalivita sp. nov.	Halorubellus sp011440375
Candidatus Halorubrum bicorimonas sp. nov.	Halorubrum sp002252755
Candidatus Halorubrum bifaritudo sp. nov.	Halorubrum sp000746205
Candidatus Halorubrum cacalilenta sp. nov.	Halorubrum sp002286985
Candidatus Halorubrum calipax sp. nov.	Halorubrum sp003990725
Candidatus Halorubrum decapetta sp. nov.	Halorubrum sp003287355
Candidatus Halorubrum defeticella sp. nov.	Halorubrum sp003023405
Candidatus Halorubrum deforitica sp. nov.	Halorubrum sp009806985
Candidatus Halorubrum doxolimonas sp. nov.	Halorubrum sp003781945
Candidatus Halorubrum fetulugo sp. nov.	Halorubrum sp003721435
Candidatus Halorubrum hecaticula sp. nov.	Halorubrum sp000296615
Candidatus Halorubrum maxumimonia sp. nov.	Halorubrum sp003666015
Candidatus Halorubrum menapastra sp. nov.	Halorubrum sp001261915
Candidatus Halorubrum nefanatio sp. nov.	Halorubrum sp005435165
Candidatus Halorubrum notabitudo sp. nov.	Halorubrum sp001564205
Candidatus Halorubrum pepenivita sp. nov.	Halorubrum sp003554605
Candidatus Halorubrum petulax sp. nov.	Halorubrum sp004114375
Candidatus Halorubrum rudecousia sp. nov.	Halorubrum sp003697845
Candidatus Halorubrum sanabimonia sp. nov.	Halorubrum sp000496175
Candidatus Halorubrum vocamigena sp. nov.	Halorubrum sp009742825
Candidatus Halorussus detecitica sp. nov.	Halorussus sp010747475
Candidatus Halorussus monacimonas sp. nov.	Halorussus sp003023465
Candidatus Halorussus morigentia sp. nov.	Halorussus sp005239435
Candidatus Halorussus nubeciforma sp. nov.	Halorussus sp004765795
Candidatus Halorussus rumifousia sp. nov.	Halorussus sp004087835
Candidatus Halorussus solipitura sp. nov.	Halorussus sp008831545
Candidatus Halorussus viragitio sp. nov.	Halorussus sp004765805
Candidatus Halosimplex cenotitudo sp. nov.	Halosimplex sp004698125
Candidatus Halosimplex cepurugo sp. nov.	Halosimplex sp003730195
Candidatus Halosimplex molecousia sp. nov.	Halosimplex sp003023165
Candidatus Halostagnicola loceledo sp. nov.	Halostagnicola sp000691505
Candidatus Halostella gemebousia sp. nov.	Halostella sp003675875
Candidatus Halostella totidastra sp. nov.	Halostella sp003023565
Candidatus Haloterrigena homagitia sp. nov.	Haloterrigena sp013342135
Candidatus Halovenus decinitas sp. nov.	Halovenus sp003021335
Candidatus Halovenus dilogitica sp. nov.	Halovenus sp003022725
Candidatus Halovenus funivilega sp. nov.	Halovenus sp001564135
Candidatus Halovenus homuliforma sp. nov.	Halovenus sp003551265
Candidatus Halovenus lupanifica sp. nov.	Halovenus sp003022085
Candidatus Halovenus malivisca sp. nov.	Halovenus sp003021015
Candidatus Halovenus pinacimonas sp. nov.	Halovenus sp009831575
Candidatus Halovenus relapax sp. nov.	Halovenus sp003022845
Candidatus Halovenus relenifica sp. nov.	Halovenus sp003021285
Candidatus Halovenus rumifitica sp. nov.	Halovenus sp003551945
Candidatus Halovenus seposibra sp. nov.	Halovenus sp000416085
Candidatus Halovenus vocififorma sp. nov.	Halovenus sp004015825
Candidatus Halovivax saxifitia sp. nov.	Halovivax sp007119345
Candidatus Halovivax supelatio sp. nov.	Halovivax sp007135505
Candidatus Halucarcha hirunastra sp. nov.	QS-1-68-17 sp003021105
Candidatus Haricarcha cenobago sp. nov.	SpSt-971 sp011334385
Candidatus Hecatarcha conopicula sp. nov.	UBA10452 sp009665115
Candidatus Hecatarcha loceletta sp. nov.	UBA10452 sp003176995
Candidatus Hecatarcha ratifitura sp. nov.	UBA10452 sp002501855
Candidatus Hecatarcha venuniforma sp. nov.	UBA10452 sp009898475
Candidatus Hemidarcha buxifimonia sp. nov.	UBA460 sp013166775
Candidatus Hemidarcha defetax sp. nov.	UBA460 sp001940755
Candidatus Hemidarcha dicibitudo sp. nov.	UBA460 sp002505645
Candidatus Hemitarcha didacigena sp. nov.	BA1 sp001399805
Candidatus Herinarcha direcitia sp. nov.	WYZ-LMO2 sp004347865
Candidatus Herinarcha refacibula sp. nov.	WYZ-LMO2 sp004347825
Candidatus Herinarcha vinulugo sp. nov.	WYZ-LMO2 sp011361745
Candidatus Herinarcha volucastra sp. nov.	WYZ-LMO2 sp011605865
Candidatus Hexagarcha ceroficula sp. nov.	SURF-65 sp003599055
Candidatus Hexamarcha defenentia sp. nov.	GCA-2688035 sp002688035
Candidatus Hexaparcha tegumisca sp. nov.	CAIVED01 sp903904885
Candidatus Hibisarcha vehicetta sp. nov.	1-14-0-10-37-12 sp002762795
Candidatus Hirudarcha bipinax sp. nov.	SOKP01 sp013375475
Candidatus Hirudarcha canacago sp. nov.	SOKP01 sp013375485
Candidatus Hirudarcha cerevitudo sp. nov.	SOKP01 sp005222975
Candidatus Hirudarcha cicatilega sp. nov.	SOKP01 sp011364925
Candidatus Hirudarcha decupousia sp. nov.	SOKP01 sp004524725
Candidatus Hirudarcha deforatio sp. nov.	SOKP01 sp013375495
Candidatus Hirudarcha laculastra sp. nov.	SOKP01 sp004375715
Candidatus Hirudarcha ludibitudo sp. nov.	SOKP01 sp005223125
Candidatus Hirudarcha veriditio sp. nov.	SOKP01 sp011364975
Candidatus Hirunarcha cululitoga sp. nov.	ARK-15 sp009758405
Candidatus Hirunarcha remulitrix sp. nov.	ARK-15 sp002878135
Candidatus Holisarcha caduratica sp. nov.	B20-G17 sp003650785
Candidatus Holovarcha vicecilega sp. nov.	UBA587 sp002504725
Candidatus Homagarcha seposigena sp. nov.	ARK-14 sp002899805
Candidatus Homicarcha ceromago sp. nov.	QENH01 sp013139985
Candidatus Homicarcha depubousia sp. nov.	QENH01 sp009903405
Candidatus Homicarcha masocitrix sp. nov.	QENH01 sp013180565
Candidatus Homicarcha tomogifica sp. nov.	QENH01 sp003336485
Candidatus Homilarcha cilibigena sp. nov.	B63 sp003601695
Candidatus Homilarcha funiventia sp. nov.	B63 sp003601725
Candidatus Homilarcha murilimonas sp. nov.	B63 sp003661975
Candidatus Homilarcha tomacigena sp. nov.	B63 sp001593845
Candidatus Homogarcha recorimonas sp. nov.	PXYB01 sp003352285
Candidatus Homogarcha rubeciforma sp. nov.	PXYB01 sp014078545
Candidatus Homolarcha detumentia sp. nov.	GW2011-AR11 sp12027u
Candidatus Homularcha depupiforma sp. nov.	B17-G15 sp003649495
Candidatus Homunarcha gemebastra sp. nov.	JAAZWY01 sp014240455
Candidatus Horomarcha voragax sp. nov.	QMZG01 sp003663045
Candidatus Humecarcha bicalastra sp. nov.	EX4484-204 sp003661745
Candidatus Humecarcha detesitas sp. nov.	EX4484-204 sp002255065
Candidatus Ignicoccus divorigena sp. nov.	Ignicoccus_A sp013154085
Candidatus Korarchaeum peropifica sp. nov.	Korarchaeum sp011056255
Candidatus Korarchaeum retecitia sp. nov.	Korarchaeum sp003344655
Candidatus Labecarcha bugilimonia sp. nov.	Tc-Br11 sp001564275
Candidatus Labecarcha cufericula sp. nov.	Tc-Br11 sp003552325
Candidatus Labecarcha velifilega sp. nov.	Tc-Br11 sp001564285
Candidatus Lacinarcha homunilega sp. nov.	B9-G16 sp003660965
Candidatus Lacularcha holisessa sp. nov.	GLR112 sp013139905
Candidatus Lametarcha dicimugo sp. nov.	CR-4 sp001940655
Candidatus Lanifarcha toluticella sp. nov.	SCGC-AAA011-G17 sp000402515
Candidatus Lanigarcha baditilega sp. nov.	PWKY01 sp003553085
Candidatus Lanigarcha defaricella sp. nov.	PWKY01 sp007133925
Candidatus Lanigarcha mirifousia sp. nov.	PWKY01 sp003560595
Candidatus Lanugarcha reduvibra sp. nov.	PL-Br10-E2g29 sp001563965
Candidatus Lapicarcha verecibra sp. nov.	HRBIN01 sp002898355
Candidatus Lapilarcha monodivita sp. nov.	JAADGB01 sp013152575
Candidatus Latibarcha latibilenta sp. nov.	UBA97 sp001871595
Candidatus Lavabarcha conamax sp. nov.	SDNM01 sp004524535
Candidatus Lavabarcha fetulisca sp. nov.	SDNM01 sp004524385
Candidatus Lavabarcha sonivisca sp. nov.	SDNM01 sp004524515
Candidatus Lavabarcha turifitura sp. nov.	SDNM01 sp004524425
Candidatus Lavacarcha defesitica sp. nov.	PWHR01 sp003551675
Candidatus Lavacarcha tenilimonas sp. nov.	PWHR01 sp003554965
Candidatus Lavacarcha vinolifica sp. nov.	PWHR01 sp003555395
Candidatus Laxitarcha lavacigena sp. nov.	DRVD01 sp011371765
Candidatus Legifarcha cimititura sp. nov.	WOR-SM1-SCG-A sp001723845
Candidatus Lenimarcha debucitio sp. nov.	UBA9653 sp9653u
Candidatus Lenimarcha semapifica sp. nov.	UBA9653 sp011391345
Candidatus Lenocarcha fetutastra sp. nov.	UBA581 sp002501775
Candidatus Lenunarcha recumitudo sp. nov.	CAISDH01 sp903884115
Candidatus Letifarcha cerucetta sp. nov.	SKNY01 sp007118975
Candidatus Letifarcha delacitio sp. nov.	SKNY01 sp007123105
Candidatus Levidarcha manomitia sp. nov.	CAIXOA01 sp903920925
Candidatus Levidarcha sitelibra sp. nov.	CAIXOA01 sp013425455
Candidatus Levifarcha deforedo sp. nov.	VBQP01 sp008297795
Candidatus Licenarcha bovicibula sp. nov.	B29-G15 sp903915225
Candidatus Licenarcha hemitimonia sp. nov.	B29-G15 sp003650585
Candidatus Locelarcha notacitura sp. nov.	MFWN01 sp001786395
Candidatus Lorararcha resupetta sp. nov.	CAIKOD01 sp903819595
Candidatus Lorararcha tetenentia sp. nov.	CAIKOD01 sp903828975
Candidatus Lubenarcha peridedo sp. nov.	EX4484-71 sp002254395
Candidatus Lucelarcha bicapitio sp. nov.	B40-G2 sp003649615
Candidatus Lucerarcha voragitio sp. nov.	PIYN01 sp003601775
Candidatus Lucifarcha bipinetta sp. nov.	MGIIb-N1 sp002170775
Candidatus Lucifarcha canacitura sp. nov.	MGIIb-N1 sp002497295
Candidatus Lucifarcha demagibra sp. nov.	MGIIb-N1 sp002495675
Candidatus Lucifarcha diludiforma sp. nov.	MGIIb-N1 sp002505695
Candidatus Lucifarcha diluvitudo sp. nov.	MGIIb-N1 sp002712645
Candidatus Lucifarcha funivitoga sp. nov.	MGIIb-N1 sp011523055
Candidatus Lucifarcha ludimitia sp. nov.	MGIIb-N1 sp002717835
Candidatus Lucifarcha mahelitudo sp. nov.	MGIIb-N1 sp002505455
Candidatus Lucifarcha mirifisca sp. nov.	MGIIb-N1 sp002504845
Candidatus Lucifarcha semivicula sp. nov.	MGIIb-N1 sp002499585
Candidatus Lucifarcha supelimonas sp. nov.	MGIIb-N1 sp002507175
Candidatus Lucubarcha nubecedo sp. nov.	B8-G13 sp003649745
Candidatus Lucularcha vitigousia sp. nov.	RBG-16-48-13 sp001775995
Candidatus Ludibarcha luculitudo sp. nov.	DTBS01 sp011366705
Candidatus Ludifarcha bimotetta sp. nov.	JACIWB01 sp014361195
Candidatus Ludifarcha caduricula sp. nov.	JACIWB01 sp014361245
Candidatus Ludimarcha decitessa sp. nov.	HEL-GB-B sp005191425
Candidatus Lugubarcha biveritia sp. nov.	QMVU01 sp003661365
Candidatus Lugubarcha mirabivita sp. nov.	QMVU01 sp003661265
Candidatus Lupanarcha metapentia sp. nov.	B3-G16 sp003649665
Candidatus Luticarcha binocatio sp. nov.	QMZY01 sp003663415
Candidatus Lutularcha necopitrix sp. nov.	CADDZR01 sp902812495
Candidatus Luxurarcha dececifica sp. nov.	WUQU01 sp009889605
Candidatus Macilarcha coticugo sp. nov.	CAIXRF01 sp903921825
Candidatus Mahelarcha munifedo sp. nov.	DSZJ01 sp011367145
Candidatus Mahelarcha mutabiforma sp. nov.	DSZJ01 sp011361855
Candidatus Mahemarcha benififica sp. nov.	CABMCJ01 sp902384585
Candidatus Malagarcha desomiforma sp. nov.	UBA164 sp009903795
Candidatus Malagarcha pavimibra sp. nov.	UBA164 sp002499005
Candidatus Malagarcha siminibra sp. nov.	UBA164 sp002506605
Candidatus Maledarcha panifago sp. nov.	B-DKE sp011334705
Candidatus Maledarcha vatilitoga sp. nov.	B-DKE sp002204705
Candidatus Malifarcha cimitilenta sp. nov.	N1521 sp005543295
Candidatus Malifarcha medimitio sp. nov.	N1521 sp005239175
Candidatus Malifarcha semivitrix sp. nov.	N1521 sp003551725
Candidatus Maligarcha daducatio sp. nov.	DTQF01 sp011332735
Candidatus Malivarcha monogetta sp. nov.	MGIIa-K2 sp002719395
Candidatus Malivarcha volubicella sp. nov.	MGIIa-K2 sp002699425
Candidatus Manibarcha cenobicella sp. nov.	B87-G9 sp003649695
Candidatus Manomarcha colapilega sp. nov.	DRVV01 sp011373895
Candidatus Manomarcha sotulessa sp. nov.	DRVV01 sp011373445
Candidatus Manubarcha lucerentia sp. nov.	JAADEY01 sp013153145
Candidatus Manufarcha decomimonia sp. nov.	DRUK01 sp011370995
Candidatus Manuparcha ludimicula sp. nov.	CAIKMX01 sp903828655
Candidatus Masocarcha curotimonas sp. nov.	JAAOZP01 sp011363915
Candidatus Masocarcha gasifitrix sp. nov.	JAAOZP01 sp011605725
Candidatus Masocarcha giganilenta sp. nov.	JAAOZP01 sp011362045
Candidatus Masocarcha negotitoga sp. nov.	JAAOZP01 sp011389375
Candidatus Mavorarcha figilessa sp. nov.	NM3 sp004212155
Candidatus Mavorarcha patibitica sp. nov.	NM3 sp011372835
Candidatus Maxilarcha catecitas sp. nov.	UBA431 sp002505525
Candidatus Maxumarcha teniledo sp. nov.	TEKIR-14 sp004524445
Candidatus Medimarcha dehinigena sp. nov.	JAADCY01 sp013154205
Candidatus Megalarcha duricitura sp. nov.	B109-G9 sp003661525
Candidatus Megalarcha gasifitio sp. nov.	B109-G9 sp003661505
Candidatus Melilarcha bicinago sp. nov.	JACIVX01 sp014361295
Candidatus Melilarcha daducentia sp. nov.	JACIVX01 sp011334735
Candidatus Meloparcha corocitura sp. nov.	QBUR01 sp013374385
Candidatus Menaparcha fiducimonas sp. nov.	1-14-0-10-44-13 sp002762985
Candidatus Meridarcha malivessa sp. nov.	JAAYNL01 sp012520845
Candidatus Metabarcha luticitudo sp. nov.	DTNV01 sp011358415
Candidatus Metaparcha cuticugo sp. nov.	HARCEL1 sp003058365
Candidatus Methanimicrococcus citipifica sp. nov.	Methanimicrococcus sp009776675
Candidatus Methanimicrococcus musulimonia sp. nov.	Methanimicrococcus sp012518265
Candidatus Methanimicrococcus sarabitio sp. nov.	Methanimicrococcus sp009784005
Candidatus Methanimicrococcus turiledo sp. nov.	Methanimicrococcus sp009783635
Candidatus Methanobacterium cacalago sp. nov.	Methanobacterium sp013403005
Candidatus Methanobacterium cibarastra sp. nov.	Methanobacterium_A sp002495625
Candidatus Methanobacterium cimelitia sp. nov.	Methanobacterium_B sp003162115
Candidatus Methanobacterium citocitio sp. nov.	Methanobacterium_B sp000744455
Candidatus Methanobacterium conubimonas sp. nov.	Methanobacterium_A sp003166335
Candidatus Methanobacterium curacousia sp. nov.	Methanobacterium_A sp002494495
Candidatus Methanobacterium defulifica sp. nov.	Methanobacterium_B sp003151535
Candidatus Methanobacterium fetutentia sp. nov.	Methanobacterium sp000499765
Candidatus Methanobacterium gabinimonas sp. nov.	Methanobacterium sp012838205
Candidatus Methanobacterium galacilenta sp. nov.	Methanobacterium_C sp002498385
Candidatus Methanobacterium levidigena sp. nov.	Methanobacterium_D sp002509665
Candidatus Methanobacterium minurugo sp. nov.	Methanobacterium_D sp002505765
Candidatus Methanobacterium monimessa sp. nov.	Methanobacterium sp000309865
Candidatus Methanobacterium nefanitas sp. nov.	Methanobacterium_A sp003161815
Candidatus Methanobacterium negotiforma sp. nov.	Methanobacterium_A sp011620845
Candidatus Methanobacterium negotilega sp. nov.	Methanobacterium_A sp002067325
Candidatus Methanobacterium pedepetta sp. nov.	Methanobacterium_D sp002494885
Candidatus Methanobacterium periditia sp. nov.	Methanobacterium sp003491305
Candidatus Methanobacterium peropicula sp. nov.	Methanobacterium_B sp003162655
Candidatus Methanobacterium peropousia sp. nov.	Methanobacterium_A sp002502855
Candidatus Methanobacterium saxopimonia sp. nov.	Methanobacterium sp002067065
Candidatus Methanobacterium telegicula sp. nov.	Methanobacterium_B sp003164415
Candidatus Methanobacterium timefedo sp. nov.	Methanobacterium sp002496805
Candidatus Methanobacterium vavasago sp. nov.	Methanobacterium_A sp002067565
Candidatus Methanobacterium vicecitia sp. nov.	Methanobacterium_B sp003158115
Candidatus Methanobacterium vitabitudo sp. nov.	Methanobacterium_B sp009712615
Candidatus Methanobrevibacter bicodimonas sp. nov.	Methanobrevibacter_A sp902772665
Candidatus Methanobrevibacter biparitoga sp. nov.	Methanobrevibacter_A sp900314695
Candidatus Methanobrevibacter cadavousia sp. nov.	Methanobrevibacter_A sp900313645
Candidatus Methanobrevibacter catililenta sp. nov.	Methanobrevibacter_C sp009777005
Candidatus Methanobrevibacter cenobimonas sp. nov.	Methanobrevibacter_A sp902768765
Candidatus Methanobrevibacter cepuledo sp. nov.	Methanobrevibacter_A sp902764015
Candidatus Methanobrevibacter cerarisca sp. nov.	Methanobrevibacter_A sp900319985
Candidatus Methanobrevibacter cohorax sp. nov.	Methanobrevibacter_A sp902764455
Candidatus Methanobrevibacter cuferastra sp. nov.	Methanobrevibacter_B sp002208625
Candidatus Methanobrevibacter culilitrix sp. nov.	Methanobrevibacter_C sp009776495
Candidatus Methanobrevibacter dapificula sp. nov.	Methanobrevibacter_A sp902801725
Candidatus Methanobrevibacter decucitrix sp. nov.	Methanobrevibacter sp902774685
Candidatus Methanobrevibacter decunousia sp. nov.	Methanobrevibacter_A sp002496065
Candidatus Methanobrevibacter derunitudo sp. nov.	Methanobrevibacter_A sp900319535
Candidatus Methanobrevibacter desomax sp. nov.	Methanobrevibacter_A sp902782595
Candidatus Methanobrevibacter detenousia sp. nov.	Methanobrevibacter_A sp900320515
Candidatus Methanobrevibacter dilogastra sp. nov.	Methanobrevibacter_A sp902774605
Candidatus Methanobrevibacter domabisca sp. nov.	Methanobrevibacter_A sp902770715
Candidatus Methanobrevibacter halucivita sp. nov.	Methanobrevibacter_C sp003315655
Candidatus Methanobrevibacter holovigena sp. nov.	Methanobrevibacter_A sp900766745
Candidatus Methanobrevibacter lameticella sp. nov.	Methanobrevibacter_A sp900769095
Candidatus Methanobrevibacter lanigentia sp. nov.	Methanobrevibacter_A sp001548675
Candidatus Methanobrevibacter lubeniforma sp. nov.	Methanobrevibacter_A sp900316895
Candidatus Methanobrevibacter mavoredo sp. nov.	Methanobrevibacter_A sp902789505
Candidatus Methanobrevibacter melilentia sp. nov.	Methanobrevibacter_A sp902785855
Candidatus Methanobrevibacter milificula sp. nov.	Methanobrevibacter sp902769175
Candidatus Methanobrevibacter molecicella sp. nov.	Methanobrevibacter_A sp900314615
Candidatus Methanobrevibacter paropilenta sp. nov.	Methanobrevibacter_A sp902783085
Candidatus Methanobrevibacter patibastra sp. nov.	Methanobrevibacter_A sp902777885
Candidatus Methanobrevibacter repuritrix sp. nov.	Methanobrevibacter_A sp902763935
Candidatus Methanobrevibacter rurigitas sp. nov.	Methanobrevibacter_B sp900314605
Candidatus Methanobrevibacter semivisca sp. nov.	Methanobrevibacter sp900321995
Candidatus Methanobrevibacter sonipisca sp. nov.	Methanobrevibacter_A sp902771435
Candidatus Methanobrevibacter subofax sp. nov.	Methanobrevibacter_A sp900318035
Candidatus Methanobrevibacter tegumax sp. nov.	Methanobrevibacter_A sp902796575
Candidatus Methanobrevibacter venabibra sp. nov.	Methanobrevibacter_A sp902794475
Candidatus Methanobrevibacter vicativita sp. nov.	Methanobrevibacter_A sp900320955
Candidatus Methanobrevibacter viginousia sp. nov.	Methanobrevibacter_C sp009784145
Candidatus Methanobrevibacter viripentia sp. nov.	Methanobrevibacter_A sp900317865
Candidatus Methanobrevibacter vitifastra sp. nov.	Methanobrevibacter sp900314635
Candidatus Methanobrevibacter voragugo sp. nov.	Methanobrevibacter_A sp902788255
Candidatus Methanobrevibacter xeropilenta sp. nov.	Methanobrevibacter sp902784195
Candidatus Methanocalculus colepedo sp. nov.	Methanocalculus sp003838185
Candidatus Methanocalculus malififica sp. nov.	Methanocalculus sp002496395
Candidatus Methanocalculus monopitrix sp. nov.	Methanocalculus sp9912u
Candidatus Methanocalculus morigimonia sp. nov.	Methanocalculus sp007130455
Candidatus Methanocalculus vatilifica sp. nov.	Methanocalculus sp003838065
Candidatus Methanocaldococcus bigematio sp. nov.	Methanocaldococcus sp013153845
Candidatus Methanocaldococcus lenocilega sp. nov.	Methanocaldococcus sp000025525
Candidatus Methanocella bigaritas sp. nov.	Methanocella_A sp002067315
Candidatus Methanococcoides linigax sp. nov.	Methanococcoides sp900774055
Candidatus Methanocorpusculum hexagatio sp. nov.	Methanocorpusculum sp002498375
Candidatus Methanocorpusculum malifatica sp. nov.	Methanocorpusculum sp001940805
Candidatus Methanocorpusculum noninatica sp. nov.	Methanocorpusculum sp003315675
Candidatus Methanocorpusculum penicousia sp. nov.	Methanocorpusculum sp002506085
Candidatus Methanoculleus cenotivita sp. nov.	Methanoculleus sp002839645
Candidatus Methanoculleus cinipitia sp. nov.	Methanoculleus sp002508705
Candidatus Methanoculleus conifitudo sp. nov.	Methanoculleus sp002497965
Candidatus Methanoculleus cuferiforma sp. nov.	Methanoculleus sp012797575
Candidatus Methanoculleus delubax sp. nov.	Methanoculleus sp012521035
Candidatus Methanoculleus depetitia sp. nov.	Methanoculleus sp001896715
Candidatus Methanoculleus docibilenta sp. nov.	Methanoculleus sp012510335
Candidatus Methanoculleus locupivita sp. nov.	Methanoculleus sp002506585
Candidatus Methanoculleus lucubibula sp. nov.	Methanoculleus sp012511245
Candidatus Methanoculleus necubigena sp. nov.	Methanoculleus sp002499455
Candidatus Methanoculleus nefanimonas sp. nov.	Methanoculleus sp002839575
Candidatus Methanoculleus penicetta sp. nov.	Methanoculleus sp002498065
Candidatus Methanoculleus peropisca sp. nov.	Methanoculleus sp000691865
Candidatus Methanoculleus semipitio sp. nov.	Methanoculleus sp002501655
Candidatus Methanoculleus voragedo sp. nov.	Methanoculleus sp012510295
Candidatus Methanofastidiosum cocolitica sp. nov.	Methanofastidiosum sp003558335
Candidatus Methanofastidiosum desucibra sp. nov.	Methanofastidiosum sp001587715
Candidatus Methanofastidiosum ficedimonia sp. nov.	Methanofastidiosum sp012799835
Candidatus Methanofastidiosum paropago sp. nov.	Methanofastidiosum sp9950u
Candidatus Methanofastidiosum pinificella sp. nov.	Methanofastidiosum sp013178285
Candidatus Methanofastidiosum rudicivita sp. nov.	Methanofastidiosum sp001587595
Candidatus Methanofastidiosum tenebatica sp. nov.	Methanofastidiosum sp001587675
Candidatus Methanofastidiosum tubicitia sp. nov.	Methanofastidiosum sp001587575
Candidatus Methanofervidicoccus denorax sp. nov.	Methanofervidicoccus sp003351865
Candidatus Methanofollis cimitessa sp. nov.	Methanofollis sp002498315
Candidatus Methanofollis demogentia sp. nov.	Methanofollis sp004297185
Candidatus Methanogenium bifarax sp. nov.	Methanogenium sp009914725
Candidatus Methanogenium metapigena sp. nov.	Methanogenium sp012523385
Candidatus Methanogenium veridibula sp. nov.	Methanogenium sp011045995
Candidatus Methanohalophilus perexibula sp. nov.	Methanohalophilus sp003722075
Candidatus Methanohalophilus tabititoga sp. nov.	Methanohalophilus sp004137855
Candidatus Methanolinea denigiforma sp. nov.	Methanolinea sp002501965
Candidatus Methanolinea detorugo sp. nov.	Methanolinea sp002067485
Candidatus Methanolinea dimidax sp. nov.	Methanolinea sp002509495
Candidatus Methanolinea figilitoga sp. nov.	Methanolinea sp11423u
Candidatus Methanolinea homilitia sp. nov.	Methanolinea sp002067095
Candidatus Methanolinea redunago sp. nov.	Methanolinea sp002067155
Candidatus Methanolinea relenicella sp. nov.	Methanolinea sp002506105
Candidatus Methanolinea repecisca sp. nov.	Methanolinea sp002067685
Candidatus Methanoliparum levidilega sp. nov.	Methanoliparum sp8915u
Candidatus Methanolliviera morigibula sp. nov.	Methanolliviera sp902158735
Candidatus Methanolliviera viburatio sp. nov.	Methanolliviera sp902158745
Candidatus Methanolobus homagicella sp. nov.	Methanolobus sp002501695
Candidatus Methanolobus mavoretta sp. nov.	Methanolobus sp004745425
Candidatus Methanolobus maxilago sp. nov.	Methanolobus sp003565715
Candidatus Methanolobus pinacifica sp. nov.	Methanolobus sp002508635
Candidatus Methanolobus repuditio sp. nov.	Methanolobus sp002507205
Candidatus Methanomassiliicoccus coturilenta sp. nov.	Methanomassiliicoccus sp012719175
Candidatus Methanomassiliicoccus lucelimonia sp. nov.	Methanomassiliicoccus sp002067635
Candidatus Methanomassiliicoccus sonipastra sp. nov.	Methanomassiliicoccus sp002508545
Candidatus Methanomethylophilus capucicella sp. nov.	Methanomethylophilus sp000350305
Candidatus Methanomethylophilus catecugo sp. nov.	Methanomethylophilus sp902787415
Candidatus Methanomethylophilus cilotisca sp. nov.	Methanomethylophilus sp002495325
Candidatus Methanomethylophilus hemidessa sp. nov.	Methanomethylophilus sp001560915
Candidatus Methanomethylophilus refocugo sp. nov.	Methanomethylophilus sp001481295
Candidatus Methanomethylophilus relecifica sp. nov.	Methanomethylophilus sp902763685
Candidatus Methanomethylophilus sonipago sp. nov.	Methanomethylophilus sp002503545
Candidatus Methanomethylovorans bisulitia sp. nov.	Methanomethylovorans sp001896725
Candidatus Methanomethylovorans nivomousia sp. nov.	Methanomethylovorans sp002067275
Candidatus Methanomethylovorans recomisca sp. nov.	Methanomethylovorans sp002067265
Candidatus Methanomethylovorans selecessa sp. nov.	Methanomethylovorans sp014361205
Candidatus Methanomethylovorans veriditica sp. nov.	Methanomethylovorans sp002508425
Candidatus Methanonatronarchaeum rubeficella sp. nov.	Methanonatronarchaeum sp004212035
Candidatus Methanoperedens bigemitio sp. nov.	Methanoperedens_A sp002839545
Candidatus Methanoperedens cacopessa sp. nov.	Methanoperedens sp012026835
Candidatus Methanoperedens capililega sp. nov.	Methanoperedens sp003104905
Candidatus Methanoperedens detunedo sp. nov.	Methanoperedens sp002487355
Candidatus Methanoperedens foricago sp. nov.	Methanoperedens sp902384525
Candidatus Methanoperedens melopessa sp. nov.	Methanoperedens sp902386115
Candidatus Methanoperedens nidifilenta sp. nov.	Methanoperedens sp902386205
Candidatus Methanoperedens refinetta sp. nov.	Methanoperedens sp902386255
Candidatus Methanoperedens sarabax sp. nov.	Methanoperedens sp902386085
Candidatus Methanoperedens selibimonas sp. nov.	Methanoperedens sp012026795
Candidatus Methanoperedens tegumentia sp. nov.	Methanoperedens sp902386135
Candidatus Methanoplasma ceromax sp. nov.	Methanoplasma sp009776625
Candidatus Methanoplasma demadedo sp. nov.	Methanoplasma sp009778275
Candidatus Methanoplasma depupago sp. nov.	Methanoplasma sp009778575
Candidatus Methanoplasma rurigilenta sp. nov.	Methanoplasma sp009786295
Candidatus Methanoplasma solifedo sp. nov.	Methanoplasma sp009777615
Candidatus Methanopyrus dilicilega sp. nov.	Methanopyrus sp013154335
Candidatus Methanopyrus pedifitudo sp. nov.	Methanopyrus sp002201895
Candidatus Methanoregula celumitoga sp. nov.	Methanoregula sp012798365
Candidatus Methanoregula cenotitrix sp. nov.	Methanoregula sp11803u
Candidatus Methanoregula corocimonas sp. nov.	Methanoregula sp002502245
Candidatus Methanoregula depicibula sp. nov.	Methanoregula sp002067035
Candidatus Methanoregula depopetta sp. nov.	Methanoregula sp002508495
Candidatus Methanoregula fatilousia sp. nov.	Methanoregula sp002835825
Candidatus Methanoregula hemitugo sp. nov.	Methanoregula sp003157895
Candidatus Methanoregula homolitoga sp. nov.	Methanoregula sp003136075
Candidatus Methanoregula laculimonia sp. nov.	Methanoregula sp002495065
Candidatus Methanoregula medimilenta sp. nov.	Methanoregula sp903832665
Candidatus Methanoregula mirabastra sp. nov.	Methanoregula sp002502735
Candidatus Methanoregula ranunago sp. nov.	Methanoregula sp002839675
Candidatus Methanoregula relecedo sp. nov.	Methanoregula sp003154335
Candidatus Methanoregula satacastra sp. nov.	Methanoregula sp003170075
Candidatus Methanoregula senacedo sp. nov.	Methanoregula sp002497485
Candidatus Methanoregula sonabibula sp. nov.	Methanoregula sp002839605
Candidatus Methanoregula turicitura sp. nov.	Methanoregula sp002495055
Candidatus Methanoregula venucitudo sp. nov.	Methanoregula sp003141335
Candidatus Methanosalsum cituvousia sp. nov.	Methanosalsum sp007127385
Candidatus Methanosarcina bicorisca sp. nov.	Methanosarcina sp001714685
Candidatus Methanosarcina bigaritio sp. nov.	Methanosarcina sp11020u
Candidatus Methanosarcina bipinitio sp. nov.	Methanosarcina sp000969965
Candidatus Methanosarcina bucoletta sp. nov.	Methanosarcina sp003164755
Candidatus Methanosarcina carecentia sp. nov.	Methanosarcina sp002505485
Candidatus Methanosarcina celumastra sp. nov.	Methanosarcina sp003157235
Candidatus Methanosarcina coninugo sp. nov.	Methanosarcina sp002496565
Candidatus Methanosarcina defenitica sp. nov.	Methanosarcina sp002509325
Candidatus Methanosarcina depupugo sp. nov.	Methanosarcina sp002499445
Candidatus Methanosarcina domabivita sp. nov.	Methanosarcina sp10923u
Candidatus Methanosarcina homolago sp. nov.	Methanosarcina sp8098u
Candidatus Methanosarcina refacicula sp. nov.	Methanosarcina sp000979455
Candidatus Methanosarcina repecifica sp. nov.	Methanosarcina sp004099695
Candidatus Methanosphaera benivedo sp. nov.	Methanosphaera sp900322125
Candidatus Methanosphaera caduredo sp. nov.	Methanosphaera sp002509095
Candidatus Methanosphaera cinipigena sp. nov.	Methanosphaera sp003266145
Candidatus Methanosphaera dapifetta sp. nov.	Methanosphaera sp11921u
Candidatus Methanosphaera dedigastra sp. nov.	Methanosphaera sp003266065
Candidatus Methanosphaera diludicula sp. nov.	Methanosphaera sp003268005
Candidatus Methanosphaera dinupitio sp. nov.	Methanosphaera sp10242u
Candidatus Methanosphaera fuligiforma sp. nov.	Methanosphaera sp003266105
Candidatus Methanosphaera hexapastra sp. nov.	Methanosphaera sp902797085
Candidatus Methanosphaera maheliforma sp. nov.	Methanosphaera sp001729965
Candidatus Methanosphaera pavimivita sp. nov.	Methanosphaera sp003266075
Candidatus Methanosphaera recomibra sp. nov.	Methanosphaera sp003266165
Candidatus Methanospirillum desoressa sp. nov.	Methanospirillum sp012729995
Candidatus Methanospirillum funamivita sp. nov.	Methanospirillum sp012520015
Candidatus Methanospirillum virecax sp. nov.	Methanospirillum sp012729535
Candidatus Methanosuratus lutulitudo sp. nov.	Methanosuratus sp014361455
[truncated: 775 more rows]
